# Host ecology regulates interspecies recombination in bacteria of the genus *Campylobacter*

Evangelos Mourkas<sup>1</sup>, Koji Yahara<sup>2</sup>, Sion C. Bayliss<sup>1</sup>, Jessica K. Calland<sup>1</sup>, Håkan Johansson<sup>3</sup>, Leonardos Mageiros<sup>1</sup>, Zilia Y. Muñoz-Ramirez<sup>4</sup>, Grant Fletcher<sup>1</sup>, Guillaume Méric<sup>1#</sup>, Matthew D. Hitchings<sup>5</sup>, Santiago Sandoval-Motta<sup>4</sup>, Javier Torres<sup>4</sup>, Keith A. Jolley<sup>6</sup>, Martin C. J. Maiden<sup>6</sup>, Patrik Ellström<sup>7</sup>, Jonas Waldenström<sup>3</sup>, Ben Pascoe<sup>1</sup>, Samuel K. Sheppard<sup>1,6\*</sup>

<sup>1</sup>The Milner Centre for Evolution, Department of Biology and Biochemistry, University of Bath, Bath BA2 7AY, UK; <sup>2</sup>Antimicrobial Resistance Research Center, National Institute of Infectious Diseases, Tokyo, 162-8640, Japan; <sup>3</sup>Centre for Ecology and Evolution in Microbial Model Systems, Linnaeus University, Kalmar, 391 82, Sweden; <sup>4</sup>Unidad de Investigacion en Enfermedades Infecciosas, UMAE Pediatría, Instituto Mexicano del Seguro Social; <sup>5</sup>Swansea University Medical School, Swansea University, Singleton Park, Swansea, SA2 8PP, UK; <sup>6</sup>Department of Zoology, University of Oxford, South Parks Road, Oxford, OX1 3PS, UK; <sup>7</sup>Department of Medical Sciences, Zoonosis Science Centre, Uppsala University, Uppsala, Sweden;

\*Corresponding authors: Samuel K. Sheppard; [s.k.sheppard@bath.ac.uk](mailto:s.k.sheppard@bath.ac.uk)

<sup>#</sup>Present address: Cambridge Baker Systems Genomics Initiative, Baker Heart and Diabetes Institute, 75 Commercial Rd, Melbourne 3004, Victoria, Australia; Department of Infectious Diseases, Central Clinical School, Monash University, Melbourne, Victoria 3004, Australia.

Keywords: *Campylobacter*, genus, species, niche, adaptation, host, evolution.

Running title: Comparative genomics of the *Campylobacter* genus

## 28 **Abstract**

29 Horizontal gene transfer (HGT) can allow traits that have evolved in one bacterial species to  
 30 transfer to another. This has potential to rapidly promote new adaptive trajectories such as  
 31 zoonotic transfer or antimicrobial resistance. However, for this to occur requires gaps to align  
 32 in barriers to recombination within a given time frame. Chief among these barriers is the  
 33 physical separation of species with distinct ecologies in separate niches. Within the genus  
 34 *Campylobacter* there are species with divergent ecologies, from rarely isolated single host  
 35 specialists to multi-host generalist species that are among the most common global causes of  
 36 human bacterial gastroenteritis. Here, by characterising these contrasting ecologies, we can  
 37 quantify HGT among sympatric and allopatric species in natural populations. Analysing  
 38 recipient and donor population ancestry among genomes from 30 *Campylobacter* species we  
 39 show that cohabitation in the same host can lead to a 6-fold increase in HGT between species.  
 40 This accounts for up to 30% of all SNPs within a given species and identifies highly  
 41 recombinogenic genes with functions including host adaptation and antimicrobial resistance.  
 42 As described in some animal and plant species, ecological factors are a major evolutionary  
 43 force for speciation in bacteria and changes to the host landscape can promote partial  
 44 convergence of distinct species through HGT.

45

46

## 47 **Introduction**

48 It is well established that bacteria do not conform to a strict clonal model of reproduction but  
 49 engage in regular horizontal gene transfer (HGT)<sup>1</sup>. This lateral exchange of DNA can confer  
 50 new functionality on recipient genomes, potentially promoting novel adaptive trajectories  
 51 such as colonization of a new host or the emergence of pathogenicity<sup>2</sup>. In some cases, gene  
 52 flow can occur at such magnitude, even between different species<sup>3,4</sup>, that one may question  
 53 why disparate lineages do not merge and why distinct bacterial species exist at all<sup>5</sup>. An  
 54 answer to this lies in considering the successive processes that enable genes from one strain  
 55 to establish in an entirely new genetic background.

56  
 57 The probability of HGT is governed by the interaction of multiple factors, including exposure  
 58 to DNA, the susceptibility of the recipient genome to DNA uptake, and the impact of  
 59 recombined DNA on the recipient strain. These factors can be broadly defined in three  
 60 functional phases and HGT can only occur when gaps align in each successive ecological,  
 61 mechanistic and adaptive barriers within a given time frame (Fig. 1). In the first phase, the  
 62 quantity of DNA available to recipient strains is determined by ecological factors such as the  
 63 distribution, prevalence and interactions of donor and recipient bacteria, as well as the  
 64 capacity for free DNA to be disseminated among species/strains. In the second phase, there  
 65 are mechanistic barriers to HGT imposed by the homology dependence of recombination<sup>6</sup> or  
 66 other factors promoting DNA specificity - such as restriction-modification, CRISPR  
 67 interference or antiphage systems<sup>7-11</sup> - that can act as a defence against the uptake of foreign  
 68 DNA (mechanistic barriers)<sup>12,13</sup>. Finally, the effect that HGT has on the fitness of the  
 69 recipient cell in a given selective environment (adaptive barrier) will determine if the  
 70 recombinant genotype survives for subsequent generations<sup>2,14</sup>.

71  
 72 Understanding how ecology maintains, and potentially confines, distinct strains and species  
 73 has become increasingly important in the light of global challenges such as the emergence  
 74 and spread of zoonotic pathogens<sup>15</sup>. A typical approach to investigating this is to consider  
 75 spillover of particular strains or clones from one host to another (clonal transmission). This is  
 76 an important phenomenon and may be influenced by anthropogenic change, such as habitat  
 77 encroachment or agricultural intensification<sup>16</sup>. However, in many cases, important  
 78 phenotypes, including antimicrobial resistance (AMR)<sup>17-19</sup>, can be conferred by relatively  
 79 few genes. In such cases, it may be important to consider how cohabiting strains and species  
 80 can potentially draw genes from a common pangenome pool<sup>20-23</sup> and how genes, rather than

clones, can transition between segregated populations (gene pool transmission). To investigate the impact of ecological segregation (ecological barriers) on this gene pool transmission, in natural populations, requires quantification of HGT among sympatric and allopatric bacteria.

Species within the genus *Campylobacter* are an ideal subject for considering how ecology influences the maintenance of genetically distinct species for several reasons. First, *Campylobacter* are a common component of the commensal gut microbiota of reptiles<sup>24,25</sup>, birds<sup>26,27</sup> and mammals<sup>28</sup> but, being microaerophilic, do not survive well outside of the host. This creates island populations that have some degree of ecological isolation. Second, because at least 12 species have been identified as human pathogens<sup>29</sup> and *C. jejuni* and *C. coli* among the most common global causes of bacterial gastroenteritis<sup>30</sup>, large numbers of isolate genomes have been sequenced from potential reservoir hosts as part of public health source tracking programs<sup>31,32</sup>. Third, within the genus there are species and strains that inhabit one or multiple hosts (ecological specialists and generalists<sup>16,26,33–37</sup>). As a single host can simultaneously carry multiple lineages<sup>38</sup>, possibly occupying different sub-niches within that host<sup>39</sup>, there is potential to compare allopatric and sympatric populations. Finally, high magnitude interspecies admixture (introgression) between *C. jejuni* and *C. coli* isolated from agricultural animals suggests that host ecology plays a role in the maintenance of species<sup>40–43</sup>.

Here, we quantify HGT among 600 genomes from 30 *Campylobacter* species using a ‘chromosome painting’ approach<sup>44–46</sup> to characterize shared ancestry among donor and recipient populations. Specifically, we investigate the role of ecological barriers to interspecies gene flow. By identifying recombining species pairs within the same and different hosts we can describe interactions where co-localization enhances gene flow, quantify the impact of ecological barriers in these populations and distinguish highly recombinogenic genes that are found in multiple genetic backgrounds. This provides information about the evolutionary forces that gave rise to species and the extent to which ecological barriers maintain them as discrete entities.

## Results

### Host restricted and host generalist *Campylobacter* species

Isolate genomes were taken from publicly available databases to represent diversity within the genus *Campylobacter*, including environmental isolates from the closely related



*Arcobacter* and *Sulfurospirillum* species to provide phylogenetic context within the *Campylobacteraceae* family (Supplementary Fig. 1). In total, there were 631 isolates from 30 different *Campylobacter* species (Fig. 2a) and 64 different sources, isolated from 31 different countries between 1964 and 2016 (Supplementary Table 1). Among the isolates, 361 were *C. jejuni* and *C. coli* and could be classified according to 31 Clonal Complexes (CCs) based upon sharing four or more alleles at seven housekeeping genes defined by multi-locus sequence typing (MLST) (Supplementary Table 1)<sup>47</sup> and were representative of known diversity in both species<sup>16,33</sup>. The obligate human commensal and pathogen *C. concisus* (n=106 isolates), comprised 2 genomospecies (GSI, n=32 and GSII, n=74), as previously described<sup>48</sup> (Supplementary Table 1). The collection also included more than 52 *C. fetus* isolate genomes, including 3 subspecies: *C. fetus subsp. fetus* (n=8), *C. fetus subsp. venerealis* (n=23) and *C. fetus subsp. testudinum* (n=21) (Supplementary Table 1)<sup>49</sup>. Two clades were observed in *C. lari* (Supplementary Fig. 2) which could correspond to previously described subspecies based on 16S rRNA sequencing<sup>50</sup>.

A maximum-likelihood phylogeny of the *Campylobacter* genus was reconstructed on a gene-by-gene concatenated sequence alignment of 820 gene families shared by >95% of all isolates, with a core genome of 903,753 base pairs (Fig. 2a). The phylogeny included species which appear to be restricted to one host or environment, including *C. iguanorium*<sup>51</sup> and *C. geochelonis*<sup>52</sup> (reptiles), *C. lanienae*<sup>53</sup> (pigs), *C. hepaticus*<sup>54</sup> (chicken liver), *C. lari* group<sup>55</sup> (marine birds and environment) and *C. pinnipediorum*<sup>56</sup> (seals) species, most of which were discovered recently (Fig. 1, Supplementary Fig. 3). Host restricted species had lower diversity possibly linked to low sample numbers, with *C. hepaticus* having the lowest diversity (Supplementary Fig. 2) with 8/10 genomes associated with isolates from the same outbreak<sup>54</sup>. For other species there was evidence of a broad host range (ecological generalists) (Fig. 1b). For example, highly structured *C. jejuni* and *C. coli* isolates were sampled from seven and six host sources respectively (Fig. 1b, Supplementary Table 1, Supplementary Fig. 2, Supplementary Fig. 3). For *C. fetus* there was distinct separation between mammal-associated *C. fetus subsp. fetus* and *C. fetus subsp. venerealis* and reptile-associated *C. fetus subsp. testudinum* (Supplementary Fig. 2) as previously described<sup>49</sup>. Unsurprisingly, a large proportion of the isolates in this study were from humans, likely reflecting intensive sampling. *C. jejuni* (27.52%; n=60/218), *C. coli* (14.68%; n=32/218) and *C. concisus* (44.5%; n=97/218) were all common among human clinical samples. However, less common species were also present, with nearly half of all *Campylobacter* species (44.83%, n=13/29) isolated

from humans at least once (Fig. 1b, Supplementary Table 1). Agricultural animals were also a common source accounting for more than 1/3 of the isolates (38.35%; 242/631), with 10/30 species isolated from more than one host species (Fig. 2b, Supplementary Table 1).

### **Evidence of interspecies recombination in the core and accessory genome**

Genome size varied between 1.40 and 2.51 Mb (Supplementary Fig. 4) (mean 1.73) and the number of genes (per isolate) ranged from 1,293 to 2,170 (mean 1,675) (Supplementary Fig. 5). The pangenome for the genus comprised 15,649 unique genes, found in at least one of the 631 isolates (Fig. 1b), with 820 genes (5.24 % of the pangenome) shared by >95% of all isolates (core genome), across 30 species (Fig. 1b). We excluded species with fewer than 3 isolates in subsequent analysis. For the remaining 15 species the core genome ranged in size from 1,116 genes in *C. lari* to 1,700 in *C. geochelonis* (Fig. 2a right panel). Differences were also noted in the size of accessory genomes, with *C. concisus* (mean: 981 genes), *C. hyointestinalis* (mean: 946 genes), *C. showae* (mean: 1,160 genes), *C. geochelonis* (mean: 1,021 genes) and *C. fetus* (mean: 912 genes) containing the highest average number of accessory genes (Fig. 3a left panel). Functional annotation of all 14,829 accessory genes showed that 71% (10,561) encoded hypothetical proteins of unknown function due to the lack of homology with well-characterized genes (Supplementary Fig. 6)<sup>57</sup>. Remaining genes were related to metabolism, DNA modification, transporters, virulence, inner membrane/periplasmic, adhesion, regulators, metal transport and antimicrobial resistance (Supplementary Fig. 6).

To further understand genetic differentiation within and between species, we generated genus-wide similarity matrices for the core and accessory genomes (Fig. 3c-d). For the core genome, pairwise average nucleotide identity (ANI) was calculated for shared genes in all possible genome pairs (Fig. 3c) using FastANI<sup>58</sup>. On average, isolates of the same species shared >95% similarity (Fig. 3c), with decreasing genetic similarity (between 85% and 90%) over greater phylogenetic distances. The number of core genome SNPs ranged from 983 to 230,264 for the 15 *Campylobacter* species with  $\geq 3$  isolates in our dataset, with *C. coli* and *C. concisus* having the greatest mean SNP numbers (Supplementary Fig. 7a) indicating considerable diversity within these species. In contrast *C. hepaticus* and *C. geochelonis* had low mean SNP numbers with 986 and 4,310, respectively. This is likely related to low sample numbers with isolates either sampled in close proximity<sup>52</sup> or from a single outbreak<sup>54</sup>.

The core genome similarity matrix provided initial evidence of interspecies gene flow (introgression). This can be observed as elevated nucleotide identity between *C. jejuni* and clade 1 *C. coli* (Fig. 3c), consistent with previous studies<sup>40,42,43</sup>. Further evidence of introgression came from pairwise ANI comparison of genus-wide core genes, in all isolates of the 15 major *Campylobacter* species, to the *C. jejuni* genome (Supplementary Fig. 7b). In the absence of gene flow, isolates from the two species should have an approximately unimodal ANI distribution reflecting accumulation of mutations throughout the genome. This was largely the case but for some species, low nucleotide divergence suggested recent recombination with *C. jejuni*. There was also evidence of interspecies accessory genome recombination. Presence/absence patterns in the accessory genome matrix show considerable accessory gene sharing among several species that was inconsistent with the phylogeny (Fig. 3d). This is well illustrated in *C. lanienae* where much of the accessory genome was shared with other *Campylobacter* species (Fig. 3d).

# **Enhanced interspecies recombination among cohabiting species.**

For *Campylobacter* inhabiting different host species there is a physical barrier to HGT. However, when there is niche overlap, interspecies recombination can occur, for example between *C. jejuni* and *C. coli* inhabiting livestock<sup>33,40,42</sup>. To understand the extent to which inhabiting different hosts impedes interspecies gene flow we quantified recombination among *Campylobacter* species where isolates originated from same host ( $x_I, y$ ) and different hosts ( $x_2, y$ ) (Fig. 4a).

ChromoPainterV2 software was used to infer tracts of DNA donated from multiple donor groups, belonging to the same CC but isolated from different hosts to recipient groups (Materials and Methods). Among 27 combinations of multiple donor groups and recipient groups, overall, there were more recombining SNPs within hosts than between hosts (Fig. 4b) and for 10/27 species pairs there was evidence of enhanced within species recombination ( $x_I \rightarrow y > x_2 \rightarrow y$ ; Fig. 4c). To assess the robustness of the analysis we included the effect of randomization and repeated the analysis by assigning random hosts for every strain (Supplementary Fig. 8). In the 10 pair species comparisons where  $x_I \rightarrow y > x_2 \rightarrow y$ , we detected 174,594 within-host recombining SNPs (mapped to 473 genes; 28.8% of NCTC11168 genes) and 109,564 between-host recombining SNPs (mapped to 395 genes; 24.05% of NCTC11168 genes). From the 473 within-host recombining genes, 45 genes contained the highest number (>95<sup>th</sup> percentile) of recombining SNPs (Supplementary Fig. 9 and 10, Supplementary Table

2). These genes have diverse inferred functions including metabolism, cell wall biogenesis, DNA modification, transcription, and translation (Supplementary Table 2).

Interspecies recombination was observed for isolates sampled from chickens between generalist lineages CC21 and CC45 (donors; *C. jejuni*) and generalist CC828 (recipient; *C. coli*). These lineages appear to have high recombination to mutation ( $r/m$ ) ratio as inferred by ClonalFrameML (Supplementary Table 3). DNA from generalist *C. jejuni* CC45 was introduced into three *Campylobacter* species, including *C. hepaticus* (chicken), *C. concisus* GSI and GSII (clinical) and *C. ureolyticus* (clinical) (Supplementary Table 4, Fig. 4c, Supplementary Fig. 9 and 10). Clonal complex 45 had the highest  $r/m$  ratio from all other lineages or species involved in the comparisons (Supplementary Table 3). There was increased recombination in genomes sampled from cattle between *C. jejuni* CC61 (donor; *C. jejuni*) and *C. fetus* and *C. hyointestinalis* (recipients) with 71.75% of all within-host recombining SNPs from all 10 comparisons detected in these two pairs (Supplementary Table 4, Fig. 3c, Supplementary Fig. 9 and 10). Agricultural associated *C. jejuni* CC61 and *C. fetus* subsp. *venerealis* involved in these comparisons were among the lineages and subspecies with the highest  $r/m$  ratios (Supplementary Table 3). The cattle-associated CC61 has previously been described as highly recombinant, and has been associated with rapid clonal expansion and adaptation in cattle<sup>16</sup>.

### The within-host mobilome

Bacteria inhabiting the same niche may benefit from functionality conferred by similar gene combinations. Recombination can promote the dissemination of adaptive genetic elements among different bacterial species. Therefore, we postulated that the genes that recombine most among species (>95<sup>th</sup> percentile) will include those that are potentially beneficial in multiple genetic backgrounds. To investigate this, we quantified mobility within the genome identifying recombining SNPs found in more than one species comparison (Fig. 5a). These SNPs mapped to 337 genes (20.52% of the NCTC11168 genes; 2.15% of the pangenome) (Fig. 5a, Supplementary Table 5). We found that 32 of those genes (9.49%) have also been found on plasmids (Supplementary Table 5). A total of 16 genes showed elevated within-host interspecies recombination in more than five species pairs (Fig. 5a, Supplementary Table 5). Genes included *cmeA* and *cmeB* which are part of the predominant efflux pump CmeABC system in *Campylobacter*. Sequence variation in the drug-binding pocket of the *cmeB* gene has been linked to increased efflux function leading to resistance to multiple drugs<sup>59</sup>. Many of

the same antimicrobial classes are used in human and veterinary medicine and this may be linked to selection for AMR *Campylobacter*, that are commonly isolated from livestock<sup>60</sup>. To investigate this further, we compared the genomes of all 631 isolates in our dataset to 8,762 known antibiotic resistance genes from the Comprehensive Antibiotic Resistance Database (CARD)<sup>61</sup>, ResFinder<sup>62</sup> and the National Center for Biotechnology Information (NCBI) databases. Homology (>75%) was found for 42 AMR determinants associated with multi-drug efflux pumps, aminoglycosides, tetracyclines and  $\beta$ -lactams (Supplementary Fig. 11). Species that contained >40% isolates from livestock, including *C. jejuni*, *C. coli*, *C. lari*, *C. hepaticus*, *C. hyointestinalis* and *C. fetus* contained far more AMR determinants (Supplementary Fig. 11). AMR genes are often collocated in the genome<sup>63</sup> and our analysis revealed several gene clusters (Supplementary Fig. 12) that have been described in previous studies<sup>63,64</sup>. These findings are consistent with HGT-mediated circulation of AMR genes among different *Campylobacter* species and support hypotheses that ecology drives gene pool transmission<sup>2,63</sup>.

*Campylobacter* host transmission and virulence have been linked with biofilm formation and changes into surface polysaccharides<sup>65,66</sup>. The *carB* gene showed elevated within-host interspecies recombination in eight species pair comparisons. This gene encodes a carbamoylphosphate synthase that has been associated with biosynthesis of substrates for many polysaccharides and is known to contain transposon insertion sites upstream of its genomic position<sup>66</sup>. Other genes with elevated within-host interspecies transfer (>7 species pairs) included *typA*, a translator regulator for GTPase and *gltX*, a glutamate-tRNA ligase, promoting survival under stress conditions<sup>67,68</sup>. Other genes included *gidA* and *hydB* associated with virulence<sup>69</sup> and hydrogenase enzyme activity (respiratory pathway in *C. concisus*, 69), respectively. By considering genes that overcome barriers to interspecies recombination and establish in multiple new genetic backgrounds, it may be possible to infer important phenotypes that allow bacteria to adapt to different hosts and environments.

## Discussion

Phylogenetic reconstruction of the genus *Campylobacter* revealed a highly structured population. Distinct core genome clustering largely supported known classification for species, subspecies (*C. fetus*,<sup>49</sup>), genomospecies (*C. concisus*,<sup>48</sup>) and clades (*C. coli*<sup>42</sup>). Also consistent with previous studies, certain species are principally associated with a specific host niche. For example, *C. fetus subsp. testudinum*, *C. iguanorum*, *C. geochelonis* were only

sampled from reptile species, and *C. pinnipediorum* was only sampled from seals. However, for several species there was clear evidence for host generalism, including *C. jejuni*, *C. coli* and *C. lari*, all of which were sampled from multiple hosts<sup>26,71</sup>. It is clear that the hosts with the greatest diversity of *Campylobacter* species were agricultural animals (and humans) (Fig. 2, Supplementary Fig. 3). While this undoubtedly reflects oversampling of these sources to some extent, the cohabitation of species in the same host niche potentially provides opportunities for interspecies HGT.

Initial evidence of interspecies gene flow came from comparison of average nucleotide identity (ANI) and the accessory genome gene presence/absence for all isolates. In each case, patterns of genetic similarity largely mirrored the phylogeny. However, consistent with previous studies<sup>40</sup>, there was clear evidence of elevated homologous and non-homologous recombination between some species. For example, core genome ANI was higher between *C. jejuni* and *C. coli* clade 1, compared to other *C. coli* clades (Fig. 3c). The evidence for non-homologous gene sharing was even more striking with accessory genome sharing across considerable genetic distances (Fig. 3d), exemplified by *C. lanienae* which shares accessory genes with most other *Campylobacter* species.

To quantify the extent to which ecological barriers influenced interspecies gene flow, it was necessary to focus on donor-recipient species pairs where there was evidence of elevated HGT in the same (sympatry) compared to different (allopatry) hosts. Perhaps unsurprisingly, this was not the case for all species comparisons. Interacting factors could lead to genetic isolation even when species inhabit the same host. First, rather than being a single niche, the host represents a collection of subniches with varying degrees of differentiation. For example, gut-associated bacteria in the same intestinal tract have been shown to occupy different microniches<sup>72</sup> and more striking segregation may be expected between *C. hepaticus* inhabits the liver in poultry<sup>54</sup> and gut-dwelling *C. jejuni* and *C. coli* in the same host. Second, there is potential for the resident microbiota to influence the colonization potential of different *Campylobacter* species and therefore the opportunity for genetic exchange, for example through succession<sup>73</sup> and inhibition of transient species by residents, as seen in some other bacteria<sup>74–76</sup> in humans.

Continued exposition of the microecology of subniches is important but for 10 species comparisons there was clear evidence of enhanced within-host gene flow allowing



quantitative analysis of ecological barriers to gene flow. Specifically, there was on average a 3-fold increase in recombination among species pairs inhabiting the same host. In some cases, this was greater, with 5-6 times more recombination among cohabiting species *C. jejuni* and *C. hointestinalis/C. fetus* in cattle. In absolute terms, this equates to approximately 30% of all recorded SNPs in the recipient species being the result of introgression. To place this in context, if greater than half (51%) of the recorded SNPs resulted from interspecies recombination then the forces of species convergence would be greater than those that maintain distinct species. If maintained over time, these relative rates could lead to progressive genetic convergence unless countered by strong genome-wide natural selection against introgressed DNA.

Quantitative SNP-based comparisons clearly ignore one very important factor. Specifically, that recombined genes that do not reduce the fitness of the recipient genome (provide an adaptive advantage) will remain in the population while others will be purged through natural selection. Therefore, by identifying genomic hotspots of recombination and the putative function of genes that recombine between species it is possible to understand more about micro-niche segregation and the host adapted gene pool. Of the 35 genes with evidence of enhanced within host HGT in  $\geq 5$  species pairs, several were linked to functions associated with proliferation in, and exploitation of, the host. For example, the *carB* gene, encoding the large subunit of carbamoylphosphatase associated with polysaccharide biosynthesis, recombined in eight cohabiting species pairs and is potentially linked to enhanced virulence and growth<sup>66</sup>. In addition, other highly mobile genes, including *typA* and *gltX* are associated with survival and proliferation in stress conditions<sup>67,68</sup>, and *hydB* is linked to NiFe hydrogenase and nickel uptake that is essential for the survival of *C. jejuni* in the gut of birds and mammals<sup>77</sup>.

Some genes showed evidence of elevated recombination in a specific host species. For example, the *glmS* and *napA* genes in cohabiting *Campylobacter* species in cattle. In many bacteria, analogs of *glmS* have multiple downstream integration specific sites (Tn7)<sup>78</sup> which may explain the mobility of this gene. Explaining the mobility of *napA* is less straight forward, but this gene is known to encode a nitrate reductase in *Campylobacter*<sup>79</sup> in microaerobic conditions which may be ecologically significant as the accumulation of nitrate in slurry, straw and drainage water can be potentially toxic to livestock mammals<sup>80</sup>.

Factors such as host physiology, diet, and metabolism undoubtedly impose selection pressures upon resident bacteria and the horizontal acquisition of genes provides a possible vehicle for adaptation. However, the widespread use of antimicrobials by humans, and in pets livestock production<sup>81,82</sup>, provides another major ecological barrier to niche colonization. We found that *gyrA* was among the most recombinogenic genes in *Campylobacter* in chickens. This is important as a single mutation in this gene is known to confer resistance to ciprofloxacin<sup>83</sup>. While the rising trend in fluorophinolone resistance in *Campylobacter* from humans and livestock<sup>84</sup> may result from spontaneous independent mutations, it is likely that it is accelerated by HGT. Interspecies recombination of AMR genes has been observed between *C. jejuni* and *C. coli* isolates from multiple sources including livestock, human and sewage<sup>63</sup>. Consistent with this, we found AMR genes present in strains from 12 *Campylobacter* species in multiple hosts (Supplementary Fig. 12). In some cases, strains from phylogenetically closely related species (*C. fetus* and *C. hyointestinalis*) isolated from cattle, shared the same AMR gene cluster (*tet44* and *ant(6)-Ib*) described before in *C. fetus* subsp. *fetus*<sup>64</sup>, indicating the circulation of colocalized AMR genes among related species and host niche gene pools. Strikingly, the efflux pump genes *cmeA* and *cmeB*, associated with multidrug resistance (MDR) were highly mobile among *Campylobacter* species with evidence of elevated within host interspecies recombination in >7 species pairs. Furthermore, the *gltX* gene, which when phosphorylated by protein kinases promotes MDR<sup>68</sup>, was also among the most introgressed genes. While a deeper understanding of gene interactions, epistasis and epigenetics would be needed to prove that the lateral acquisition of AMR genes promotes niche adaptation, these data do suggest that HGT may facilitate colonization of antimicrobial-rich host environments, potentially favouring the spread of genes into multiple genetic backgrounds.

In conclusion, we show that species within the genus *Campylobacter* include those that are host restricted as well as host generalists. When species cohabit in the same host, ecological barriers to recombination can be perforated leading to considerable introgression between species. While the magnitude of introgression varies, potentially reflecting microniche structure with the host, there is clear evidence that ecology is important in maintaining genetically distinct species. This parallels evolution in some interbreeding eukaryotes, such as Darwin's Finches, where fluctuating environmental conditions can change the selection pressures acting on species inhabiting distinct niches, potentially favouring hybrids<sup>85,86</sup>. Consistent with this, the host landscape is changing for *Campylobacter*, with intensively reared livestock now constituting 60-70% of bird and mammal biomass on earth



respectively<sup>87</sup>. This creates opportunities for species to be brought together in new adaptive landscapes and for genes to be tested multiple genetic backgrounds. By understanding the ecology of niche segregation and the genetics of bacterial adaptation we can hope to improve strategies and interventions to reduce the risk of zoonotic transmission and the spread of problematic genes among species.

## Materials & Methods

### Isolate genomes

A total of 631 *Campylobacter*, 18 *Arcobacter*, eight *Sulfurospirillum* and five *Helicobacter* genomes were assembled from previously published datasets (Supplementary Table S1). Isolates were sampled from clinical cases of campylobacteriosis and faeces of chickens, ruminants, wild birds, wild mammals, pets and environmental sources. Genomes and related metadata were uploaded and archived in the BIGS database<sup>88</sup>. All assembled genomes can be downloaded from FigShare (doi: 10.6084/m9.figshare.15061017). Comparative genomics analyses focused on the *Campylobacter* genomes representing 30 species including: *C. avium* (n=1); *C. coli* (n=143); *C. concisus* (n=106); *C. corcagiensis* (n=1); *C. cuniculorum* (n=2); *C. curvus* (n=2); *C. fetus* (n=52); *C. geochelonis* (n=3); *C. gracilis* (n=2); *C. helveticus* (n=1); *C. hepaticus* (n=10); *C. hominis* (n=1); *C. hyointestinalis* (n=16); *C. iguanorium* (n=3); *C. insulaenigrae* (n=1); *C. jejuni* (n=218); *C. lanienae* (n=26); *C. lari* (n=13); *C. mucosalis* (n=1); *C. ornithocola* (n=1); *C. peloridis* (n=1); *C. pinnipediorum* (n=9); *C. rectus* (n=1); *C. showae* (n=3); *C. sputorum* (n=1); *C. subantarcticus* (n=3); *C. upsaliensis* (n=3); *C. ureolyticus* (n=4); *C. volucris* (n=2); *Campylobacter sp* (n=1) (Supplementary Table S1).

### Pangenome characterization and phylogenetic analysis

Sequence data were analysed using PIRATE, a fast and scalable pangenomics tool which allows for orthologue gene clustering in divergent bacterial species<sup>89</sup>. Genomes were annotated in Prokka<sup>90</sup>, using a genus database comprising well annotated *C. jejuni* strains NCTC11168, 81116, 81-176 and M1, and plasmids pTet and pVir in addition to the already existing databases used by Prokka<sup>90</sup>. Briefly, annotated genomes were used as input for PIRATE. Non-redundant representative sequences were produced using CD-HIT and the longest sequence was used as a reference for sequence similarity interrogation using BLAST/DIAMOND. Gene orthologues were defined as “gene families” and were clustered in different MCL thresholds, from 10 to 98 % sequence identity (10, 20, 30, 40, 50, 60, 70, 80, 90, 95, 98). Higher MCL thresholds were used to identify allelic variation within different

loci. An inflation value of 4 was used to increase the granularity of MCL clustering between gene families. BLAST high-scoring pairs with a reciprocal minimum length of 90% of the query/subject sequence were excluded from MCL clustering to reduce the number of spurious associations between distantly related or conserved genes<sup>91</sup>. This information was used to generate gene presence/absence and allelic variation matrices. A core gene-by-gene multiple sequence alignment<sup>88</sup> was generated using MAFFT<sup>92</sup> comprising genes shared >95% of isolates. Phylogenetic trees, based on core gene-by-gene alignments, were reconstructed using the maximum-likelihood algorithm implemented in RAxML v8.2.11<sup>93</sup> with GTRGAMMA as substitution model.

### Quantifying core and accessory genome variation

The degree of genetic differentiation between species was investigated gene-by-gene as in previous studies<sup>40,94</sup> by calculating the average nucleotide identity (ANI) of all 631 *Campylobacter* genomes using FastANI v.1.0<sup>58</sup>. The analysis generated a lower triangular matrix with the lowest ANI value at 75% (as computed by FastANI). A comparable gene presence/absence matrix was produced using PIRATE and was further used to generate a heatmap of accessory genome similarity based upon gene presence or absence. Subsequently, all *Campylobacter* genomes were screened for the presence of antimicrobial resistance genes against the CARD<sup>61</sup>, ResFinder<sup>62</sup> and NCBI databases. All *Campylobacter* genomes were further screened for the presence of plasmids using mobsuite<sup>95,96</sup>. A positive hit was defined when a gene had >75% nucleotide identity over >50% of the sequence length. A gene presence/absence matrix for every antimicrobial resistance gene was generated for every genome. Genomes carrying AMR genes were screened to characterize the location of adjacent genes using SnapGene software (GSL Biotech; available at [snapgene.com](http://snapgene.com)), as previously described<sup>63</sup>. The number of core SNPs was identified using SNP-sites (v2.3.2)<sup>97</sup>.

### Inference of recombination

Each combination of a recipient group and multiple donor groups (belonging to the same CC but isolated from different hosts) was selected to compare the extent of interspecies recombination into the recipient genomes. Each donor group consisted of 8 isolates to avoid the influence of difference in sample size on estimation of the extent of interspecies recombination. Each recipient group included at least 4 isolates. We excluded *C. jejuni* and *C. coli* clade 1 genomes isolated from seals and water, as these most likely represent spillover events and not true host segregated populations. Briefly, we conducted a pairwise genome

alignment between reference genome NCTC11168 and one of the strains included in the donor-recipient analysis using progressiveMauve<sup>98</sup>. This enabled the construction of positional homology alignments for all genomes regardless gene content and genome rearrangements, which were then combined into a multiple whole-genome alignment, as previously described<sup>99</sup>. ChromoPainterV2 software was used to calculate the amount of DNA sequence that is donated from a donor to a recipient group<sup>45</sup>. ClonalFrameML<sup>100</sup> was used to infer the relative number of substitutions introduced by recombination ( $r$ ) and mutation ( $m$ ) as the ratio  $r/m$  as previously described<sup>16</sup>.

## Data availability

Genomes sequenced as part of other studies are archived on the Short Read Archive associated with BioProject accessions: PRJNA176480, PRJNA177352, PRJNA342755, PRJNA345429, PRJNA312235, PRJNA415188, PRJNA524300, PRJNA528879, PRJNA529798, PRJNA575343, PRJNA524315 and PRJNA689604. Additional genomes were also downloaded from NCBI<sup>101</sup> and pubMLST (<http://pubmlst.org/campylobacter>). Contiguous assemblies of all genome sequences compared are available at the public data repository Figshare (doi: 10.6084/m9.figshare.15061017) and individual project and accession numbers can be found in Supplementary Table 1.

## References

1. Smith, J. M., Dowson, C. G. & Spratt, B. G. Localized sex in bacteria. *Nature* **349**, 29–31 (1991).
2. Sheppard, S. K., Guttman, D. S. & Fitzgerald, J. R. Population genomics of bacterial host adaptation. *Nat. Rev. Genet.* **19**, 549–565 (2018).
3. Shapiro, B. J., Leducq, J.-B. & Mallet, J. What Is Speciation? *PLOS Genet.* **12**, e1005860 (2016).
4. Doolittle, W. F. & Zhaxybayeva, O. On the origin of prokaryotic species. *Genome Res.* **19**, 744–756 (2009).
5. Doolittle, W. F. & Papke, R. T. Genomics and the bacterial species problem. *Genome Biol.* **7**, 116 (2006).
6. Fraser, C., Hanage, W. P. & Spratt, B. G. Recombination and the nature of bacterial speciation. *Science* **315**, 476–80 (2007).
7. Budroni, S. *et al.* *Neisseria meningitidis* is structured in clades associated with restriction modification systems that modulate homologous recombination. *Proc. Natl.*

- 489        *Acad. Sci.* **108**, 4494–4499 (2011).
- 490    8.    Oliveira, P. H., Touchon, M. & Rocha, E. P. C. Regulation of genetic flux between  
491        bacteria by restriction–modification systems. *Proc. Natl. Acad. Sci.* **113**, 5658–5663  
492        (2016).
- 493    9.    Doron, S. *et al.* Systematic discovery of antiphage defense systems in the microbial  
494        pangenome. *Science* (80-. ). **359**, eaar4120 (2018).
- 495    10.   Nandi, T. *et al.* *Burkholderia pseudomallei* sequencing identifies genomic clades with  
496        distinct recombination, accessory, and epigenetic profiles. *Genome Res.* **25**, 129–141  
497        (2015).
- 498    11.   Marraffini, L. A. & Sontheimer, E. J. CRISPR Interference Limits Horizontal Gene  
499        Transfer in Staphylococci by Targeting DNA. *Science* (80-. ). **322**, 1843–1845 (2008).
- 500    12.   Thomas, C. M. & Nielsen, K. M. Mechanisms of, and Barriers to, Horizontal Gene  
501        Transfer between Bacteria. *Nat. Rev. Microbiol.* **3**, 711–721 (2005).
- 502    13.   Eggleston, A. K., Mitchell, A. H. & West, S. C. In Vitro Reconstitution of the Late  
503        Steps of Genetic Recombination in *E. coli*. *Cell* **89**, 607–617 (1997).
- 504    14.   Zhu, P. *et al.* Fit genotypes and escape variants of subgroup III *Neisseria meningitidis*  
505        during three pandemics of epidemic meningitis. *Proc. Natl. Acad. Sci.* **98**, 5234–5239  
506        (2001).
- 507    15.   Boni, M. F. *et al.* Evolutionary origins of the SARS-CoV-2 sarbecovirus lineage  
508        responsible for the COVID-19 pandemic. *Nat. Microbiol.* **5**, 1408–1417 (2020).
- 509    16.   Mourkas, E. *et al.* Agricultural intensification and the evolution of host specialism in  
510        the enteric pathogen *Campylobacter jejuni*. *Proc. Natl. Acad. Sci.* **117**, 11018–11028  
511        (2020).
- 512    17.   Johnson, A. P. & Woodford, N. Global spread of antibiotic resistance: the example of  
513        New Delhi metallo- $\beta$ -lactamase (NDM)-mediated carbapenem resistance. *J. Med.*  
514        *Microbiol.* **62**, 499–513 (2013).
- 515    18.   Schwarz, S. & Johnson, A. P. Transferable resistance to colistin: a new but old threat.  
516        *J. Antimicrob. Chemother.* **71**, 2066–70 (2016).
- 517    19.   Baker, K. S. *et al.* Horizontal antimicrobial resistance transfer drives epidemics of  
518        multiple *Shigella* species. *Nat. Commun.* **9**, 1462 (2018).
- 519    20.   Young, J. P. W. Bacteria Are Smartphones and Mobile Genes Are Apps. *Trends*  
520        *Microbiol.* **24**, 931–932 (2016).
- 521    21.   McInerney, J. O., Whelan, F. J., Domingo-Sananes, M. R., McNally, A. & O’Connell,  
522        M. J. Pangenomes and Selection: The Public Goods Hypothesis. in *The Pangenome*

- 151–167 (Springer International Publishing, 2020). doi:10.1007/978-3-030-38281-0\_7
22. Vos, M. & Eyre-Walker, A. Are pangenomes adaptive or not? *Nat. Microbiol.* **2**, 1576 (2017).
23. Werren, J. H. Selfish genetic elements, genetic conflict, and evolutionary innovation. *Proc. Natl. Acad. Sci.* **108**, 10863–10870 (2011).
24. Giacomelli, M. & Piccirillo, A. Pet reptiles as potential reservoir of *Campylobacter* species with zoonotic potential: TABLE 1: *Vet. Rec.* **174**, 479.2–479 (2014).
25. Fitzgerald, C. *et al.* *Campylobacter fetus* subsp. *testudinum* subsp. nov., isolated from humans and reptiles. *Int. J. Syst. Evol. Microbiol.* **64**, 2944–2948 (2014).
26. Griekspoor, P. *et al.* Marked host specificity and lack of phylogeographic population structure of *Campylobacter jejuni* in wild birds. *Mol. Ecol.* **22**, 1463–1472 (2013).
27. Atterby, C. *et al.* The Potential of Isolation Source to Predict Colonization in Avian Hosts: A Case Study in *Campylobacter jejuni* Strains From Three Bird Species. *Front. Microbiol.* **9**, (2018).
28. Leatherbarrow, A. J. H. *et al.* *Campylobacter lari*: genotype and antibiotic resistance of isolates from cattle, wildlife and water in an area of mixed dairy farmland in the United Kingdom. *Environ. Microbiol.* **9**, 1772–1779 (2007).
29. Man, S. M. The clinical importance of emerging *Campylobacter* species. *Nat. Rev. Gastroenterol. Hepatol.* **8**, 669–685 (2011).
30. Kaakoush, N. O., Castaño-Rodríguez, N., Mitchell, H. M. & Man, S. M. Global Epidemiology of *Campylobacter* Infection. *Clin. Microbiol. Rev.* **28**, 687–720 (2015).
31. Sheppard, S. K. *et al.* *Campylobacter* genotypes from food animals, environmental sources and clinical disease in Scotland 2005/6. *Int. J. Food Microbiol.* **134**, 96–103 (2009).
32. Sheppard, S. K. *et al.* *Campylobacter* genotyping to determine the source of human infection. *Clin. Infect. Dis.* **48**, 1072–8 (2009).
33. Sheppard, S. K. *et al.* Niche segregation and genetic structure of *Campylobacter jejuni* populations from wild and agricultural host species. *Mol. Ecol.* **20**, 3484–90 (2011).
34. Dearlove, B. L. *et al.* Rapid host switching in generalist *Campylobacter* strains erodes the signal for tracing human infections. *ISME J.* **10**, 721–729 (2016).
35. Sheppard, S. K. *et al.* Host Association of *Campylobacter* Genotypes Transcends Geographic Variation. *Appl. Environ. Microbiol.* **76**, 5269–5277 (2010).
36. Sheppard, S. K. *et al.* Cryptic ecology among host generalist *Campylobacter jejuni* in domestic animals. *Mol. Ecol.* **23**, 2442–2451 (2014).

- 557 37. Woodcock, D. J. *et al.* Genomic plasticity and rapid host switching can promote the  
558 evolution of generalism: a case study in the zoonotic pathogen *Campylobacter*. *Sci.*  
559 *Rep.* **7**, 9650 (2017).
- 560 38. Colles, F. M., Dingle, K. E., Cody, A. J. & Maiden, M. C. J. Comparison of  
561 *Campylobacter* Populations in Wild Geese with Those in Starlings and Free-Range  
562 Poultry on the Same Farm. *Appl. Environ. Microbiol.* **74**, 3583–3590 (2008).
- 563 39. Colles, F. M., McCarthy, N. D., Bliss, C. M., Layton, R. & Maiden, M. C. J. The long-  
564 term dynamics of *Campylobacter* colonizing a free-range broiler breeder flock: an  
565 observational study. *Environ. Microbiol.* **17**, 938–946 (2015).
- 566 40. Sheppard, S. K. *et al.* Progressive genome-wide introgression in agricultural  
567 *Campylobacter coli*. *Mol. Ecol.* **22**, 1051–64 (2013).
- 568 41. Taylor, A. J. *et al.* Cross-species evolutionary rewiring in the enteric bacterium  
569 *Campylobacter*. *bioRxiv* 2021.03.15.435406 (2021). doi:10.1101/2021.03.15.435406
- 570 42. Sheppard, S. K., McCarthy, N. D., Falush, D. & Maiden, M. C. J. Convergence of  
571 *Campylobacter* Species: Implications for Bacterial Evolution. *Science (80-. ).* **320**,  
572 237–239 (2008).
- 573 43. Sheppard, S. K., McCarthy, N. D., Jolley, K. A. & Maiden, M. C. J. Introgression in  
574 the genus *Campylobacter*: generation and spread of mosaic alleles. *Microbiology* **157**,  
575 1066–1074 (2011).
- 576 44. Thorell, K. *et al.* Rapid evolution of distinct *Helicobacter pylori* subpopulations in the  
577 Americas. *PLOS Genet.* **13**, e1006730 (2017).
- 578 45. Lawson, D. J., Hellenthal, G., Myers, S. & Falush, D. Inference of Population  
579 Structure using Dense Haplotype Data. *PLoS Genet.* **8**, e1002453 (2012).
- 580 46. Yahara, K. *et al.* Chromosome Painting In Silico in a Bacterial Species Reveals Fine  
581 Population Structure. *Mol. Biol. Evol.* **30**, 1454–1464 (2013).
- 582 47. Dingle, K. E. *et al.* Multilocus sequence typing system for *Campylobacter jejuni*. *J.*  
583 *Clin. Microbiol.* **39**, 14–23 (2001).
- 584 48. Kirk, K. F. *et al.* Molecular epidemiology and comparative genomics of  
585 *Campylobacter concisus* strains from saliva, faeces and gut mucosal biopsies in  
586 inflammatory bowel disease. *Sci. Rep.* **8**, 1902 (2018).
- 587 49. Iraola, G. *et al.* Distinct *Campylobacter fetus* lineages adapted as livestock pathogens  
588 and human pathobionts in the intestinal microbiota. *Nat. Commun.* **8**, 1367 (2017).
- 589 50. Debruyne, L., On, S. L. W., De Brandt, E. & Vandamme, P. Novel *Campylobacter*  
590 *lari*-like bacteria from humans and molluscs: description of *Campylobacter peloridis*



- 591 sp. nov., *Campylobacter lari* subsp. *concheus* subsp. nov. and *Campylobacter lari*  
592 subsp. *lari* subsp. nov. *Int. J. Syst. Evol. Microbiol.* **59**, 1126–32 (2009).
- 593 51. Gilbert, M. J., Kik, M., Miller, W. G., Duim, B. & Wagenaar, J. A. *Campylobacter*  
594 *iguaniorum* sp. nov., isolated from reptiles. *Int. J. Syst. Evol. Microbiol.* **65**, 975–982  
595 (2015).
- 596 52. Piccirillo, A. *et al.* *Campylobacter geochelonis* sp. nov. isolated from the western  
597 Hermann's tortoise (*Testudo hermanni hermanni*). *Int. J. Syst. Evol. Microbiol.* **66**,  
598 3468–3476 (2016).
- 599 53. Logan, J. M. J., Burnens, A., Linton, D., Lawson, A. J. & Stanley, J. *Campylobacter*  
600 *lanienae* sp. nov., a new species isolated from workers in an abattoir. *Int. J. Syst. Evol.*  
601 *Microbiol.* **50**, 865–872 (2000).
- 602 54. Van, T. T. H., Elshagmani, E., Gor, M. C., Scott, P. C. & Moore, R. J. *Campylobacter*  
603 *hepaticus* sp. nov., isolated from chickens with spotty liver disease. *Int. J. Syst. Evol.*  
604 *Microbiol.* **66**, 4518–4524 (2016).
- 605 55. Miller, W. G. *et al.* Comparative genomics of the *Campylobacter lari* group. *Genome*  
606 *Biol. Evol.* **6**, 3252–66 (2014).
- 607 56. Gilbert, M. J. *et al.* *Campylobacter pinnipediorum* sp. nov., isolated from pinnipeds,  
608 comprising *Campylobacter pinnipediorum* subsp. *pinnipediorum* subsp. nov. and  
609 *Campylobacter pinnipediorum* subsp. *caledonicus* subsp. nov. *Int. J. Syst. Evol.*  
610 *Microbiol.* **67**, 1961–1968 (2017).
- 611 57. Pascoe, B. *et al.* Domestication of *Campylobacter jejuni* NCTC 11168. *Microb.*  
612 *genomics* **5**, (2019).
- 613 58. Jain, C., Rodriguez-R, L. M., Phillippy, A. M., Konstantinidis, K. T. & Aluru, S. High  
614 throughput ANI analysis of 90K prokaryotic genomes reveals clear species boundaries.  
615 *Nat. Commun.* **9**, 5114 (2018).
- 616 59. Yao, H. *et al.* Emergence of a Potent Multidrug Efflux Pump Variant That Enhances  
617 *Campylobacter* Resistance to Multiple Antibiotics. *MBio* **7**, 1–11 (2016).
- 618 60. Livermore, D. M. Introduction: the challenge of multiresistance. *Int. J. Antimicrob.*  
619 *Agents* **29**, S1–S7 (2007).
- 620 61. Jia, B. *et al.* CARD 2017: expansion and model-centric curation of the comprehensive  
621 antibiotic resistance database. *Nucleic Acids Res.* **45**, D566–D573 (2017).
- 622 62. Zankari, E. *et al.* Identification of acquired antimicrobial resistance genes. *J.*  
623 *Antimicrob. Chemother.* **67**, 2640–2644 (2012).
- 624 63. Mourkas, E. *et al.* Gene pool transmission of multidrug resistance among

- 625 *Campylobacter* from livestock, sewage and human disease. *Environ. Microbiol.* **21**,  
626 4597–4613 (2019).
- 627 64. Abril, C., Brodard, I. & Perreten, V. Two Novel Antibiotic Resistance Genes, tet(44)  
628 and ant(6)-Ib, Are Located within a Transferable Pathogenicity Island in  
629 *Campylobacter fetus* subsp. *fetus*. *Antimicrob. Agents Chemother.* **54**, 3052–3055  
630 (2010).
- 631 65. Szymanski, C. M., Logan, S. M., Linton, D. & Wren, B. W. *Campylobacter* – a tale of  
632 two protein glycosylation systems. *Trends Microbiol.* **11**, 233–238 (2003).
- 633 66. McLennan, M. K. *et al.* *Campylobacter jejuni* Biofilms Up-Regulated in the Absence  
634 of the Stringent Response Utilize a Calcofluor White-Reactive Polysaccharide. *J.*  
635 *Bacteriol.* **190**, 1097–1107 (2008).
- 636 67. Margus, T., Remm, M. & Tenson, T. Phylogenetic distribution of translational  
637 GTPases in bacteria. *BMC Genomics* **8**, 1–18 (2007).
- 638 68. Semanjski, M. *et al.* The kinases HipA and HipA7 phosphorylate different substrate  
639 pools in *Escherichia coli* to promote multidrug tolerance. *Sci. Signal.* **11**, (2018).
- 640 69. Mikheil, D. M., Shippy, D. C., Eakley, N. M., Okwumabua, O. E. & Fadl, A. A.  
641 Deletion of gene encoding methyltransferase (*gidB*) confers high-level antimicrobial  
642 resistance in *Salmonella*. *J. Antibiot. (Tokyo)*. **65**, 185–192 (2012).
- 643 70. Benoit, S. L. & Maier, R. J. Site-directed mutagenesis of *Campylobacter concisus*  
644 respiratory genes provides insight into the pathogen’s growth requirements. *Sci. Rep.*  
645 **8**, 14203 (2018).
- 646 71. Cody, A. J. *et al.* Wild bird-associated *Campylobacter jejuni* isolates are a consistent  
647 source of human disease, in Oxfordshire, United Kingdom. *Environ. Microbiol. Rep.* **7**,  
648 782–788 (2015).
- 649 72. Hayashi, H., Takahashi, R., Nishi, T., Sakamoto, M. & Benno, Y. Molecular analysis  
650 of jejunal, ileal, caecal and recto-sigmoidal human colonic microbiota using 16S rRNA  
651 gene libraries and terminal restriction fragment length polymorphism. *J. Med.*  
652 *Microbiol.* **54**, 1093–1101 (2005).
- 653 73. Lu, J. *et al.* Diversity and succession of the intestinal bacterial community of the  
654 maturing broiler chicken. *Appl. Environ. Microbiol.* **69**, 6816–24 (2003).
- 655 74. Stecher, B. *et al.* Like will to like: abundances of closely related species can predict  
656 susceptibility to intestinal colonization by pathogenic and commensal bacteria. *PLoS*  
657 *Pathog.* **6**, e1000711 (2010).
- 658 75. van Elsas, J. D. *et al.* Microbial diversity determines the invasion of soil by a bacterial



- 659 pathogen. *Proc. Natl. Acad. Sci. U. S. A.* **109**, 1159–64 (2012).
- 660 76. Nowrouzian, F. L., Wold, A. E. & Adlerberth, I. *Escherichia coli* strains belonging to  
661 phylogenetic group B2 have superior capacity to persist in the intestinal microflora of  
662 infants. *J. Infect. Dis.* **191**, 1078–83 (2005).
- 663 77. Howlett, R. M., Hughes, B. M., Hitchcock, A. & Kelly, D. J. Hydrogenase activity in  
664 the foodborne pathogen *Campylobacter jejuni* depends upon a novel ABC-type nickel  
665 transporter (NikZYXWV) and is SlyD-independent. *Microbiology* **158**, 1645–1655  
666 (2012).
- 667 78. Choi, K.-H. Applications of Transposon-Based Gene Delivery System in Bacteria. *J.*  
668 *Microbiol. Biotechnol.* **19**, 217–28 (2009).
- 669 79. Pittman, M. S. *et al.* Growth of *Campylobacter jejuni* on nitrate and nitrite: electron  
670 transport to NapA and NrfA via NrfH and distinct roles for NrfA and the globin Cgb in  
671 protection against nitrosative stress. *Mol. Microbiol.* **63**, 575–590 (2007).
- 672 80. Alexander, J. *et al.* Nitrite as undesirable substances in animal feed □ Scientific  
673 Opinion of the Panel on Contaminants in the Food Chain. *EFSA J.* **7**, 1–47 (2009).
- 674 81. Teuber, M. Veterinary use and antibiotic resistance. *Curr. Opin. Microbiol.* **4**, 493–499  
675 (2001).
- 676 82. Price, L. B., Koch, B. J. & Hungate, B. A. Ominous projections for global antibiotic  
677 use in food-animal production. *Proc. Natl. Acad. Sci. U. S. A.* **112**, 5554–5 (2015).
- 678 83. Luo, N., Sahin, O., Lin, J., Michel, L. O. & Zhang, Q. In Vivo Selection of  
679 *Campylobacter* Isolates with High Levels of Fluoroquinolone Resistance Associated  
680 with *gyrA* Mutations and the Function of the CmeABC Efflux Pump. *Antimicrob.*  
681 *Agents Chemother.* **47**, 390–394 (2003).
- 682 84. Sproston, E. L., Wimalaratna, H. M. L. & Sheppard, S. K. Trends in fluoroquinolone  
683 resistance in *Campylobacter*. *Microb. Genomics* **4**, 1–8 (2018).
- 684 85. Mallet, J. Hybrid speciation. *Nature* **446**, 279–283 (2007).
- 685 86. Grant, P. R. & Grant, B. R. Hybridization of Bird Species. *Science (80-. ).* **256**, 193–  
686 197 (1992).
- 687 87. Bar-On, Y. M., Phillips, R. & Milo, R. The biomass distribution on Earth. *Proc. Natl.*  
688 *Acad. Sci.* **115**, 6506–6511 (2018).
- 689 88. Sheppard, S. K., Jolley, K. A. & Maiden, M. C. J. A Gene-By-Gene Approach to  
690 Bacterial Population Genomics: Whole Genome MLST of *Campylobacter*. *Genes*  
691 *(Basel).* **3**, 261–277 (2012).
- 692 89. Bayliss, S. C., Thorpe, H. A., Coyle, N. M., Sheppard, S. K. & Feil, E. J. PIRATE: A

- fast and scalable pangenomics toolbox for clustering diverged orthologues in bacteria.  
*Gigascience* **8**, 1–9 (2019).
90. Seemann, T. Prokka: rapid prokaryotic genome annotation. *Bioinformatics* **30**, 2068–  
2069 (2014).
91. Sahl, J. W., Caporaso, J. G., Rasko, D. A. & Keim, P. The large-scale blast score ratio  
(LS-BSR) pipeline: a method to rapidly compare genetic content between bacterial  
genomes. *PeerJ* **2**, e332 (2014).
92. Katoh, K. MAFFT: a novel method for rapid multiple sequence alignment based on  
fast Fourier transform. *Nucleic Acids Res.* **30**, 3059–3066 (2002).
93. Stamatakis, A. RAxML version 8: a tool for phylogenetic analysis and post-analysis of  
large phylogenies. *Bioinformatics* **30**, 1312–1313 (2014).
94. Didelot, X., Achtman, M., Parkhill, J., Thomson, N. R. & Falush, D. A bimodal  
pattern of relatedness between the *Salmonella* Paratyphi A and Typhi genomes:  
convergence or divergence by homologous recombination? *Genome Res.* **17**, 61–8  
(2007).
95. Robertson, J. & Nash, J. H. E. MOB-suite: software tools for clustering, reconstruction  
and typing of plasmids from draft assemblies. *Microb. genomics* **4**, (2018).
96. Robertson, J., Bessonov, K., Schonfeld, J. & Nash, J. H. E. Universal whole-sequence-  
based plasmid typing and its utility to prediction of host range and epidemiological  
surveillance. *Microb. Genomics* **6**, 1–12 (2020).
97. Page, A. J. *et al.* SNP-sites: rapid efficient extraction of SNPs from multi-FASTA  
alignments. *Microb. Genomics* **2**, e000056 (2016).
98. Darling, A. E., Mau, B. & Perna, N. T. progressiveMauve: Multiple Genome  
Alignment with Gene Gain, Loss and Rearrangement. *PLoS One* **5**, e11147 (2010).
99. Yahara, K. *et al.* Genomic surveillance of *Neisseria gonorrhoeae* to investigate the  
distribution and evolution of antimicrobial-resistance determinants and lineages.  
*Microb. Genomics* **4**, 1–3 (2018).
100. Didelot, X. & Wilson, D. J. ClonalFrameML: Efficient Inference of Recombination in  
Whole Bacterial Genomes. *PLOS Comput. Biol.* **11**, e1004041 (2015).
101. NCBI Resource Coordinators. Database resources of the National Center for  
Biotechnology Information. *Nucleic Acids Res.* **44**, D7–D19 (2016).

## Acknowledgements

This work was supported by Wellcome Trust grants 088786/C/09/Z and Medical Research Council (MRC) grants MR/M501608/1 and MR/L015080/1 awarded to S.K.S.

## Competing interests

The authors declare no competing interests.

## Figure legends

**Fig. 1. Barriers to horizontal gene transfer in bacteria.** A series of barriers must be surmounted for DNA to transmit from one species to another. These are broadly defined in three categories. At a given time, alignment of holes in successive barriers is necessary for HGT to occur. Here we focus on ecological barriers that are influenced by multiple factors that reflect the physical isolation of bacteria in separate niches.

**Fig. 2. Population structure and host ecology in the genus *Campylobacter*.** **a**, Phylogenetic tree of 631 *Campylobacter* isolates from 30 species reconstructed using a gene-by-gene concatenated alignment of 820 core genes (shared by >95% of isolates) and an approximation of the maximum-likelihood algorithm (ML) implemented in RAxML. The species name is indicated adjacent to the associated sequence cluster. The scale bar indicates the estimated number of substitutions per site. **b**, Isolation source of *Campylobacter* species with  $n \geq 3$  isolates.

**Fig. 3. Core and accessory genome variation in the genus *Campylobacter*.** **a**, Overall distribution of the total number of accessory genes (left) and core genes (right) per isolate for each *Campylobacter* species (where  $n \geq 3$  isolates). The number of accessory genes is shown as boxplots (min to max). **b**, Venn diagram of pangenomes among different *Campylobacter* species ( $n \geq 9$ ). The number of core genes shared by all species is illustrated in the center. **c**, Pairwise average nucleotide identity comparison calculated for all 631 *Campylobacter* isolates based upon 820 core genes shared by >95% of isolates. ANI values <75% are not calculated by FastANI<sup>58</sup>. **d**, Pairwise accessory genome similarity based upon gene presence or absence at 2,168 non-core loci. The heatmaps coloring ranges from yellow (minimum) to red (maximum). The matrices are ordered according to the phylogenetic tree presented in Fig. 2a. Different colours correspond to *Campylobacter* species with  $\geq 3$  isolates.

**Fig. 4. Elevated within-host interspecies recombination and donor-recipient comparisons.** **a**, A hypothesis depicting the relationships between *Campylobacter* species, *C. jejuni* ( $x_1$ ,  $x_2$ ) and *C. coli* ( $y$ ), when found in the same or in different hosts. **b**, Number of recombining SNPs within and between host as inferred by chromosome painting analysis for all donor recipient species comparisons. The error bar represents the standard error of the mean (SEM). **c**, The figure shows the number of donated SNPs in 10 donor-recipient pair species comparisons. The proportion (%) of recombining SNPs with >90% probability of copying from a donor to a recipient genome is illustrated in the y axis. All donor groups are shown in the x axis. All coloured boxes correspond to comparison where donors and recipients are found in the same host.

**Fig. 5. The mobilome of the *Campylobacter* genus.** **a**, The graph illustrates the proportion of recombining genes in 10 different species comparisons. The number of species pairs in which the gene was found to recombine is shown on the x axis and the number of genes in each category is given on the y axis and. The exact number of genes found in each group comparison is shown on the top of each box. **b**, Number of *Campylobacter* species harbouring AMR genes that belong to efflux pumps and four different antibiotic classes which are shown on the x axis. **c**, The circos plot indicates the 16 genes involved in recombination in >5 donor-recipient pair species comparisons. Gene matches are indicated by joining lines, coloured differently for each gene. Gene names are shown around the perimeter for each *Campylobacter* species. **d**, The circos plot indicates the sharing of AMR genes associated with efflux pumps and four antibiotic classes among *Campylobacter* species. Presence of at least one gene (not necessarily the same gene) conferring resistance to a specific antibiotic class is indicated by joining lines, coloured differently for each drug class. Efflux pumps (i),  $\beta$ -lactams (ii), tetracyclines (iii), aminoglycosides (iv) and lincosamides (v) are shown around the perimeter for each *Campylobacter* species.

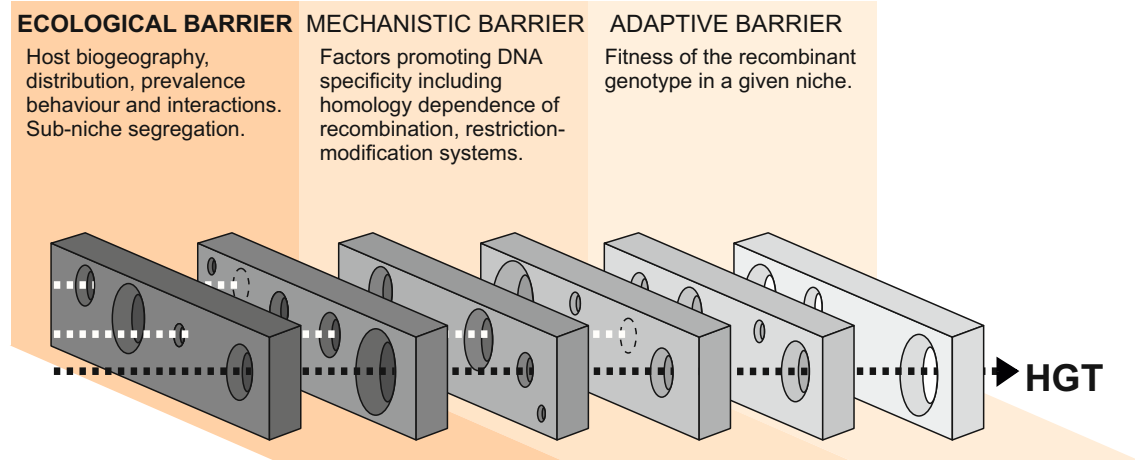

**a**

bioRxiv preprint doi: <https://doi.org/10.1101/2021.08.24.457495>; this version posted August 24, 2021. The copyright holder for this preprint (which was not certified by peer review) is the author/funder, who has granted bioRxiv a license to display the preprint in perpetuity. It is made available under aCC-BY-NC-ND 4.0 International license.

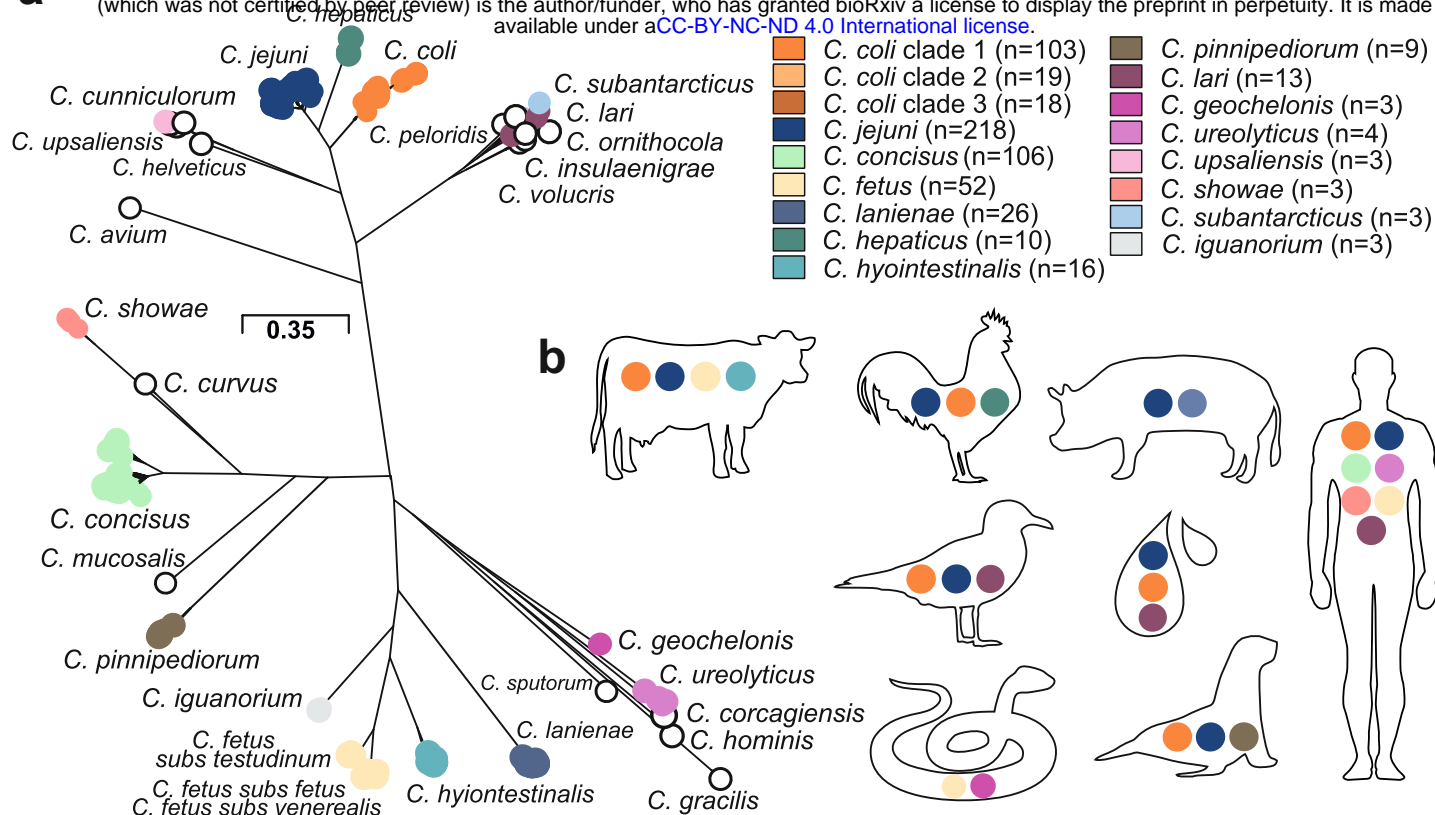

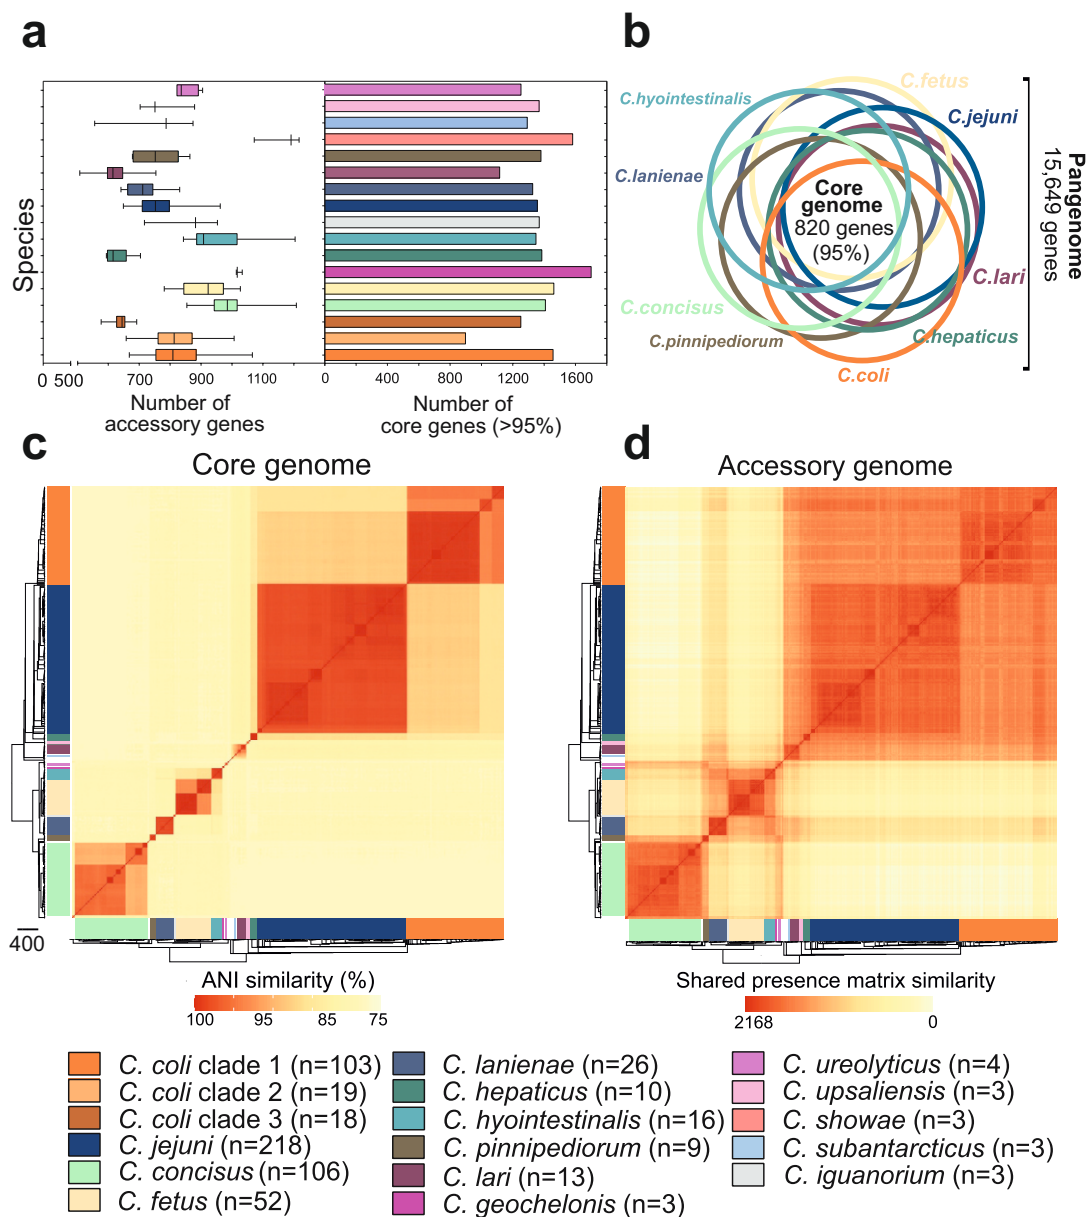

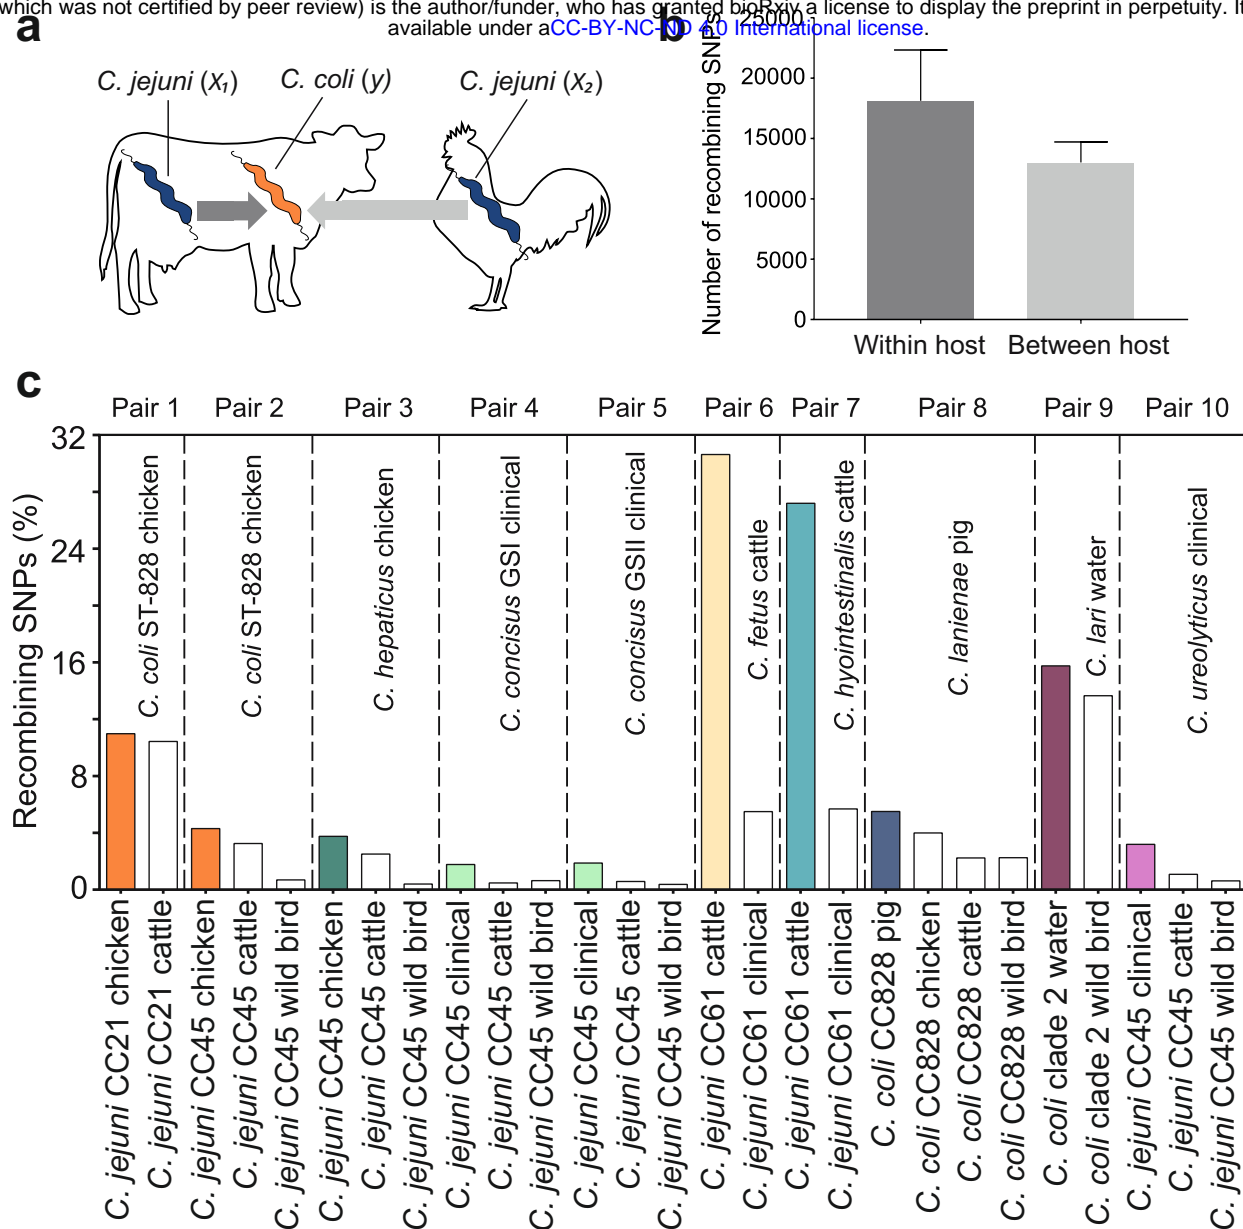



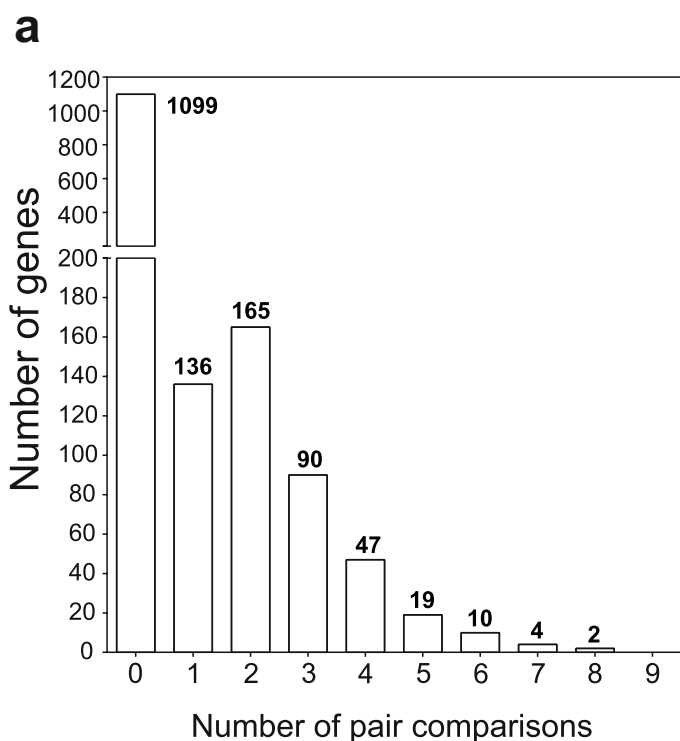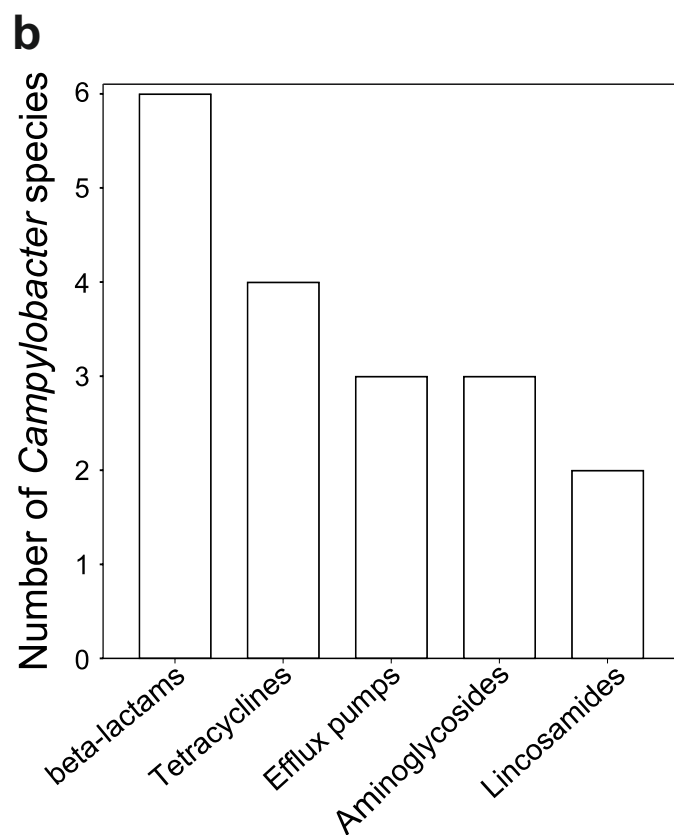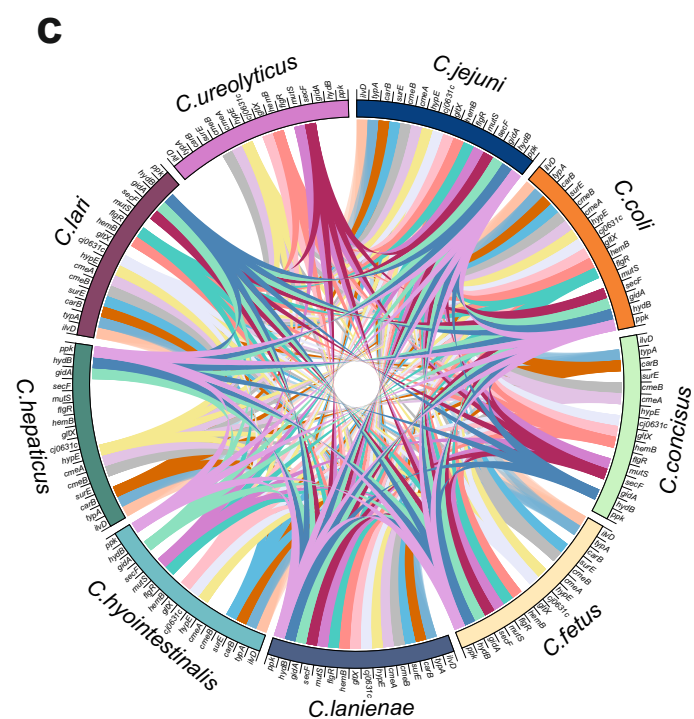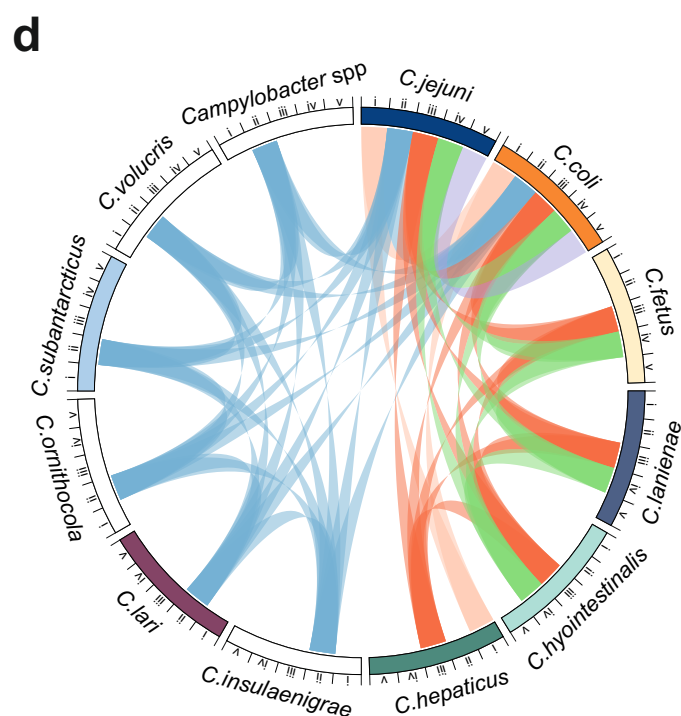

Source: https://biorxiv.org/content/10.1101/2021.08.24.457495v1.full.pdf
