# Supplementary material for: Host ecology regulates interspecies recombination in bacteria of the genus Campylobacter
Source: bioRxiv preprint, doi:10.1101/2021.08.24.457495, version 2 (2022-02-25)
Supplement: Figure 3-source data 1 [file 457495_file15.xlsx]

## Sheet: Figure 3a-left panel
	Ccoli_1_828 (n=103)	Ccoli_2 (n=19)	Ccoli_3 (n=18)	Cconcisus (n=106)	Cfetus (n=52)	Cgeochelonis (n=3)	Chepaticus (n=3)	Chyointestinalis (n=16)	Ciguanorium (n=3)	Cjejuni (n=218)	Clanienae (n=26)	Clari (n=13)	Cpinnipediorum (n=9)	Cshowae (n=3)	Csubantarcticus (n=3)	Cupsaliensis (n=3)	Cureolyticus (n=4)
	755	746	611	941	898	1014	594	1204	717	721	694	508	752	1072	556	751	905
	751	658	625	923	903	1017	658	915	882	780	743	554	864	1191	787	879	850
	746	828	643	974	903	1033	704	871	953	825	793	682	834	1217	874	703	822
	786	710	598	879	926		659	927		835	831	602	679				822
	874	674	692	870	912		657	900		776	740	616	779
	800	779	628	992	813		596	901		834	755	613	682
	961	783	577	957	811		598	1064		756	805	615	678
	911	788	630	977	848		600	938		772	743	632	818
	931	919	656	997	807		602	1036		901	708	754	722
	861	1007	668	985	811		629	1024		726	647	595
	806	813	653	984	893			892		728	710	636
	753	836	651	981	812			893		859	713	657
	754	877	645	925	807			843		767	748	600
	668	761	644	919	817			850		761	664
	694	829	639	911	822			994		795	658
	952	862	657	884	942			884		795	742
	960	915	647	883	801					796	647
	904	871	653	890	845					777	653
	728	799		880	875					741	677
	849			879	781					704	690
	862			871	1027					699	641
	743			854	920					702	698
	749			869	800					705	732
	805			883	835					703	770
	927			920	844					699	660
	1066			928	926					703	716
	908			941	896					756
	803			958	887					754
	955			971	864					767
	941			1019	976					820
	829			1015	928					867
	878			1031	995					777
	908			1021	990					677
	807			1010	963					752
	839			972	947					796
	811			862	1018					715
	812			1208	995					774
	790			1095	960					817
	944			1100	973					703
	832			1041	1015					724
	835			1045	953					806
	952			1001	1023					815
	836			1078	991					790
	827			1038	969					886
	826			1010	909					780
	884			1022	961					824
	944			1073	1002					831
	854			1016	960					846
	801			1032	937					778
	769			1032	975					884
	776			1002	996					822
	751			1029	966					820
	942			987						774
	890			1035						719
	731			1025						829
	783			1008						819
	809			1034						821
	894			1027						755
	811			981						779
	859			989						718
	886			1050						764
	803			983						777
	892			972						737
	834			1028						859
	815			988						814
	742			986						671
	759			967						873
	743			1009						927
	791			980						855
	790			985						834
	749			980						844
	842			965						902
	691			966						808
	804			1009						850
	868			977						864
	987			1002						720
	900			920						704
	870			880						698
	793			963						701
	750			947						671
	751			941						749
	751			938						733
	752			994						702
	752			949						706
	752			945						753
	779			947						706
	740			934						748
	812			984						694
	960			1010						698
	809			999						702
	757			1006						689
	894			1013						689
	970			943						775
	874			976						734
	750			984						749
	738			930						805
	788			985						956
	785			1009						952
	752			986						874
	729			1034						818
	768			1050						951
	766			991						885
	797			1060						814
				1012						729
				1077						937
				1123						904
										810
										848
										962
										829
										873
										829
										724
										765
										829
										772
										775
										756
										822
										774
										766
										711
										776
										744
										776
										733
										696
										754
										708
										707
										706
										793
										690
										689
										705
										889
										903
										691
										797
										757
										723
										707
										739
										705
										710
										706
										710
										772
										795
										702
										707
										751
										726
										836
										724
										789
										719
										714
										799
										724
										686
										706
										743
										710
										791
										762
										672
										699
										768
										754
										754
										727
										755
										778
										728
										729
										729
										777
										748
										746
										747
										740
										753
										746
										748
										755
										699
										714
										696
										712
										739
										764
										712
										764
										708
										712
										752
										713
										733
										704
										664
										680
										656
										649
										691
										834
										751
										750
										703
										793
										712
										784
										740
										697
										704
										709
										691
										725

## Sheet: Figure 3a-right panel
	Ccoli_1_828 (n=103)	Ccoli_2 (n=19)	Ccoli_3 (n=18)	Cconcisus (n=106)	Cfetus (n=52)	Cgeochelonis (n=3)	Chepaticus (n=10)	Chyointestinalis (n=16)	Ciguanorium (n=3)	Cjejuni (n=218)	Clanienae (n=26)	Clari (n=13)	Cpinnipediorum (n=9)	Cshowae (n=3)	Csubantarcticus (n=3)	Cupsaliensis (n=3)	Cureolyticus (n=4)
	1457	898	1251	1408	1462	1700	1385	1348	1369	1357	1327	1116	1380	1582	1292	1367	1252

## Sheet: Figure 3b
	Name	C. coli (n=143)	C. concisus (n=106)	C. hepaticus (n=10)	C. hyointestinalis (n=16)	C. fetus (n=52)	C. jejuni (n=218)	C. lanienae (n=26)	C. lari (n= 13)	C. pinnipediorum (n=9)
	C. coli (n=143)		781	1035	836	852	1073	836	885	801
	C. concisus (n=106)	781		850	1021	1026	835	938	792	1085
	C. hepaticus (n=10)	1035	850		906	930	1159	906	940	883
	C. hyointestinalis (n=16)	836	1021	906		1221	895	1098	839	1030
	C. fetus (n=52)	852	1026	930	1221		913	1100	849	1051
	C. jejuni (n=218)	1073	835	1159	895	913		895	946	869
	C. lanienae (n=26)	836	938	906	1098	1100	895		827	948
	C. lari (n= 13)	885	792	940	839	849	946	827		812
	C. pinnipediorum (n=9)	801	1085	883	1030	1051	869	948	812

## Sheet: Figure 3c
ID	5347	5354	5350	5348	5627	5609	5683	5678	5662	5358	5360	5625	5657	5643	5666	5691	5636	5361	5363	5699	5618	5599	5629	5620	5630	5357	5614	5697	5690	5703	5638	5619	5709	5621	5617	5631	5649	5704	5702	5694	5624	5623	5715	5713	5701	5626	5706	5369	5598
5347	100	89.2899	88.7687	89.2938	77.7489	77.2806	77.6487	77.7152	77.4469	77.5476	77.1527	77.4333	77.4231	77.4372	77.5846	77.6542	77.4289	77.5359	77.7331	77.5663	77.7145	77.8047	77.6169	78.2902	78.2863	77.6491	77.5821	77.176	77.4272	77.3107	77.568	77.606	77.7286	77.7353	77.742	77.8317	77.5953	77.6043	77.5459	77.5761	77.5179	77.5057	77.7778	77.7193	77.8143	77.1991	77.8764	77.6984	77.4627
5354	89.2899	100	92.0468	92.9752	78.278	78.0446	78.0243	77.9393	78.0819	78.1093	77.8006	77.9366	77.9396	78.0907	78.1526	78.0701	78.5998	78.3124	77.8432	78.1822	78.4336	78.4244	78.0089	79.4498	79.4744	78.3377	78.2705	78.3821	78.4963	78.0179	78.2115	78.2596	78.2348	78.4197	78.3712	78.1668	78.1893	78.1061	78.1732	78.5342	78.0914	78.0914	78.4053	78.5511	78.0631	78.044	78.5791	78.3787	78.2291
5350	88.7687	92.0468	100	92.5675	80.283	80.4903	80.5417	80.7	79.6467	80.4165	79.596	80.0311	80.0311	80.1729	80.3245	80.5788	79.9414	79.9379	80.131	80.2255	79.777	79.9113	80.4014	81.2961	81.2791	80.06	80.5168	80.1557	80.256	80.5634	79.6436	79.6496	80.5573	80.2669	80.35	80.6573	79.8415	80.0896	80.0842	80.4145	80.334	80.334	80.684	80.6591	80.2915	80.3009	80.6203	79.9505	79.8521
5348	89.2938	92.9752	92.5675	100	78.4278	78.1496	78.0404	78.0684	77.9284	78.326	77.8538	78.2382	78.2382	78.5061	77.9746	78.2127	78.3575	78.2738	77.8512	78.5855	78.2166	78.2672	77.9207	78.3522	78.3661	78.2625	78.3221	78.1117	78.3122	78.2379	78.1385	78.2322	78.2219	78.2712	78.1443	78.2009	78.2525	78.3429	78.1327	78.3183	77.9863	77.9866	78.1013	78.1308	78.0429	78.0316	78.4929	78.1872	78.2193
5627	77.7489	78.278	80.283	78.4278	100	95.4233	95.451	95.4449	95.8302	95.6492	95.6553	95.595	95.5964	95.5877	95.7322	95.1891	95.0091	94.7534	94.9097	95.0114	94.9626	94.9912	94.986	94.9235	94.9766	94.8862	95.0202	94.9086	94.9439	94.8446	94.8269	94.8279	94.6423	94.4034	94.4135	94.3648	94.2017	94.2083	94.2538	94.4078	94.51	94.5158	94.7423	94.7039	95.0221	94.9829	94.8669	94.7386	94.9439
5609	77.2806	78.0446	80.4903	78.1496	95.4233	100	95.4342	95.4291	95.5689	95.4893	95.5389	95.5846	95.5846	95.5684	95.7084	95.0901	94.9665	94.8293	94.8488	95.0313	94.87	94.843	94.9486	94.9082	94.9783	94.858	94.9839	94.9807	94.9885	94.8395	94.8153	94.8016	94.7463	94.5229	94.5071	94.5137	94.2681	94.1529	94.2452	94.4427	94.4663	94.4663	94.7468	94.731	94.9046	94.942	94.8446	94.7673	94.7892
5683	77.6487	78.0243	80.5417	78.0404	95.451	95.4342	100	99.8118	95.7199	95.7755	95.4783	95.5113	95.5113	95.6123	95.7195	95.3021	95.0308	94.8727	94.8744	95.0113	95.01	95.0304	95.066	94.9981	95.1031	94.9897	95.0016	95.0142	94.972	94.9184	94.921	94.8928	94.8159	94.5353	94.6095	94.5155	94.2299	94.2102	94.1778	94.3811	94.5484	94.5484	94.7357	94.705	94.9394	95.0758	94.8477	94.7958	94.8874
5678	77.7152	77.9393	80.7	78.0684	95.4449	95.4291	99.8118	100	95.5976	95.67	95.3767	95.5108	95.5108	95.589	95.4657	95.2505	95.0789	94.8901	94.9754	95.0253	94.9836	95.1127	95.0222	95.0422	95.0865	94.9789	95.0323	94.9922	94.9424	94.9314	94.9073	94.8497	94.8636	94.6155	94.6579	94.5693	94.237	94.3177	94.281	94.4604	94.5698	94.5698	94.8394	94.8021	94.977	95.0536	94.8172	94.7892	94.9073
5662	77.4469	78.0819	79.6467	77.9284	95.8302	95.5689	95.7199	95.5976	100	95.8621	95.8283	95.8931	95.8931	95.9348	95.9747	95.33	95.2226	95.0187	94.963	95.2132	95.1902	95.1342	95.1457	95.0755	95.1453	95.1157	95.2698	95.164	95.1276	94.9806	95.0325	95.0618	94.9719	94.5538	94.5275	94.4971	94.4651	94.3872	94.4254	94.4761	94.6091	94.6091	94.9432	94.8113	95.1626	95.0943	94.9799	94.9789	95.1436
5358	77.5476	78.1093	80.4165	78.326	95.6492	95.4893	95.7755	95.67	95.8621	100	95.7521	95.6158	95.6158	95.8974	95.874	95.3734	95.1694	94.9417	94.9493	95.1453	95.0695	95.1072	95.144	95.2113	95.2537	94.9821	95.0333	95.0596	95.1512	94.9328	94.9876	94.9314	94.9369	94.4719	94.531	94.4567	94.3043	94.2742	94.2375	94.5298	94.6408	94.6381	94.8484	94.8029	95.1135	95.154	94.878	94.9068	95.0817
5360	77.1527	77.8006	79.596	77.8538	95.6553	95.5389	95.4783	95.3767	95.8283	95.7521	100	96.1721	96.1721	95.8506	95.9114	95.3075	95.2197	95.0838	95.1184	95.1907	95.1164	95.1338	95.1678	95.1171	95.1311	95.1171	95.1103	95.1118	95.048	94.9893	95.0086	94.9836	94.9925	94.5249	94.6484	94.7251	94.5197	94.4508	94.4713	94.6197	94.6921	94.6921	94.9432	94.896	95.1153	95.1127	94.9605	95.016	94.9893
5625	77.4333	77.9366	80.0311	78.2382	95.595	95.5846	95.5113	95.5108	95.8931	95.6158	96.1721	100	100	95.8018	95.9819	95.3016	95.2549	95.0006	94.9818	95.2988	95.1174	95.1234	95.125	95.0321	95.0978	95.0857	95.1248	95.031	95.0255	94.9449	94.9743	94.9517	94.9034	94.4162	94.4737	94.6974	94.29	94.3156	94.3226	94.4253	94.4458	94.4115	94.7125	94.7577	95.0379	95.1149	94.8948	94.9689	95.0464
5657	77.4231	77.9396	80.0311	78.2382	95.5964	95.5846	95.5113	95.5108	95.8931	95.6158	96.1721	100	100	95.8018	95.9819	95.3016	95.2549	95.0006	94.9818	95.2988	95.1174	95.1234	95.125	95.012	95.0978	95.0857	95.1248	95.0277	95.0255	94.9449	94.9743	94.9517	94.8988	94.4162	94.4737	94.6974	94.29	94.3156	94.3226	94.4253	94.4458	94.4115	94.7078	94.7577	95.0379	95.1149	94.8948	94.9767	95.0419
5643	77.4372	78.0907	80.1729	78.5061	95.5877	95.5684	95.6123	95.589	95.9348	95.8974	95.8506	95.8018	95.8018	100	95.8896	95.292	95.2827	94.9355	94.9559	95.1829	95.0857	95.1933	95.2133	95.2941	95.2061	94.8933	95.1234	95.202	95.1821	94.9855	95.0437	94.9575	94.9031	94.5749	94.7008	94.5997	94.4149	94.399	94.4077	94.5625	94.6992	94.7074	94.9102	94.8459	95.1748	95.301	95.0584	94.9709	95.0136
5666	77.5846	78.1526	80.3245	77.9746	95.7322	95.7084	95.7195	95.4657	95.9747	95.874	95.9114	95.9819	95.9819	95.8896	100	95.3568	95.2467	95.0444	95.0386	95.2807	95.2988	95.203	95.2978	95.219	95.2585	95.1081	95.3378	95.2653	95.2448	95.034	95.0474	94.9863	95.0554	94.7031	94.7104	94.6311	94.414	94.3616	94.3846	94.6321	94.7262	94.7262	94.973	95.0236	95.1989	95.2544	95.1368	95.0155	95.0974
5691	77.6542	78.0701	80.5788	78.2127	95.1891	95.0901	95.3021	95.2505	95.33	95.3734	95.3075	95.3016	95.3016	95.292	95.3568	100	95.3962	95.0855	95.3097	95.316	95.3495	95.3118	95.2255	95.3523	95.3839	95.3211	95.2011	95.3897	95.3423	95.1228	95.04	95.0457	95.0593	94.6559	94.74	94.6627	94.5849	94.4081	94.3614	94.6685	94.779	94.779	94.9485	94.9855	95.1366	95.3426	95.1308	95.0753	95.1903
5636	77.4289	78.5998	79.9414	78.3575	95.0091	94.9665	95.0308	95.0789	95.2226	95.1694	95.2197	95.2549	95.2549	95.2827	95.2467	95.3962	100	95.2216	95.234	95.2229	95.1471	95.267	95.1162	95.2874	95.22	95.0812	95.1499	95.258	95.1938	95.1289	95.0389	95.0287	94.9261	94.6862	94.6682	94.5818	94.4534	94.4436	94.3757	94.5484	94.6752	94.6752	94.8	94.7878	94.9791	95.3006	94.9582	94.9231	95.0708
5361	77.5359	78.3124	79.9379	78.2738	94.7534	94.8293	94.8727	94.8901	95.0187	94.9417	95.0838	95.0006	95.0006	94.9355	95.0444	95.0855	95.2216	100	95.2831	95.0881	95.0302	94.948	94.9476	94.9084	94.8984	94.9312	94.9386	95.0556	95.0369	94.9558	94.9357	94.9212	94.861	94.5472	94.5845	94.6554	94.6702	94.5178	94.5104	94.6518	94.7418	94.7418	94.7048	94.768	94.9201	95.0058	94.9174	94.7866	95.0091
5363	77.7331	77.8432	80.131	77.8512	94.9097	94.8488	94.8744	94.9754	94.963	94.9493	95.1184	94.9818	94.9818	94.9559	95.0386	95.3097	95.234	95.2831	100	95.0216	94.9857	94.9313	95.046	95.0795	95.0216	94.9487	95.0957	95.0285	95.0782	95.0836	94.8675	94.955	95.0334	94.634	94.7005	94.7592	94.7309	94.5578	94.5903	94.682	94.8625	94.8625	94.9222	94.9874	95.1568	95.0471	95.0764	94.8461	95.0465
5699	77.5663	78.1822	80.2255	78.5855	95.0114	95.0313	95.0113	95.0253	95.2132	95.1453	95.1907	95.2988	95.2988	95.1829	95.2807	95.316	95.2229	95.0881	95.0216	100	95.3211	95.3084	95.4024	95.2738	95.3016	95.1937	95.3291	95.3793	95.3473	95.1773	95.0805	95.0992	95.1739	94.7743	94.7676	94.6524	94.4397	94.4548	94.4421	94.7483	94.7967	94.7967	95.0034	94.9668	95.2365	95.2935	95.227	95.1977	95.2592
5618	77.7145	78.4336	79.777	78.2166	94.9626	94.87	95.01	94.9836	95.1902	95.0695	95.1164	95.1174	95.1174	95.0857	95.2988	95.3495	95.1471	95.0302	94.9857	95.3211	100	99.9254	95.4231	95.4733	95.4444	95.2999	95.2576	95.5556	95.525	95.3733	95.5026	95.536	95.2575	94.9355	95.015	94.7202	94.4063	94.6557	94.6017	94.8719	94.9817	94.9817	95.1998	95.1212	95.5296	95.4885	95.4575	95.3755	95.6347
5599	77.8047	78.4244	79.9113	78.2672	94.9912	94.843	95.0304	95.1127	95.1342	95.1072	95.1338	95.1234	95.1234	95.1933	95.203	95.3118	95.267	94.948	94.9313	95.3084	99.9254	100	95.3952	95.5003	95.4898	95.3093	95.2638	95.5582	95.4926	95.3345	95.485	95.5414	95.2077	94.9278	94.9595	94.6554	94.3897	94.7996	94.6904	94.8411	94.9577	94.9577	95.2147	95.0961	95.5699	95.5784	95.3907	95.3162	95.6392
5629	77.6169	78.0089	80.4014	77.9207	94.986	94.9486	95.066	95.0222	95.1457	95.144	95.1678	95.125	95.125	95.2133	95.2978	95.2255	95.1162	94.9476	95.046	95.4024	95.4231	95.3952	100	95.3861	95.343	95.2764	95.4892	95.4248	95.451	95.1639	95.2431	95.2259	95.239	94.8952	94.9192	94.7838	94.4665	94.6144	94.629	94.8585	94.9971	94.9971	95.1189	95.1328	95.4013	95.3517	95.263	95.1703	95.3036
5620	78.2902	79.4498	81.2961	78.3522	94.9235	94.9082	94.9981	95.0422	95.0755	95.2113	95.1171	95.0321	95.012	95.2941	95.219	95.3523	95.2874	94.9084	95.0795	95.2738	95.4733	95.5003	95.3861	100	99.9435	95.45	95.3274	95.4243	95.4616	95.1733	95.1605	95.2321	95.204	94.8897	94.8577	94.832	94.4103	94.6408	94.6473	94.9092	94.9846	94.9846	95.0364	94.9656	95.3605	95.5049	95.3031	95.3117	95.3315
5630	78.2863	79.4744	81.2791	78.3661	94.9766	94.9783	95.1031	95.0865	95.1453	95.2537	95.1311	95.0978	95.0978	95.2061	95.2585	95.3839	95.22	94.8984	95.0216	95.3016	95.4444	95.4898	95.343	99.9435	100	95.4118	95.2466	95.4293	95.4134	95.1961	95.1658	95.1902	95.2359	94.8668	94.9016	94.8651	94.4655	94.6168	94.5722	94.9437	94.9997	94.9997	95.0464	94.9675	95.4256	95.4583	95.3091	95.2802	95.3616
5357	77.6491	78.3377	80.06	78.2625	94.8862	94.858	94.9897	94.9789	95.1157	94.9821	95.1171	95.0857	95.0857	94.8933	95.1081	95.3211	95.0812	94.9312	94.9487	95.1937	95.2999	95.3093	95.2764	95.45	95.4118	100	95.1584	95.2324	95.3019	95.0765	95.0884	95.1582	95.1766	94.6729	94.7066	94.8343	94.4059	94.6521	94.5886	94.8226	94.9076	94.8891	94.8866	94.8856	95.2699	95.3524	95.1788	95.0988	95.251
5614	77.5821	78.2705	80.5168	78.3221	95.0202	94.9839	95.0016	95.0323	95.2698	95.0333	95.1103	95.1248	95.1248	95.1234	95.3378	95.2011	95.1499	94.9386	95.0957	95.3291	95.2576	95.2638	95.4892	95.3274	95.2466	95.1584	100	95.439	95.4836	95.2825	95.1927	95.1425	95.2825	94.8838	94.832	94.8731	94.4766	94.5765	94.5714	94.8632	94.9785	94.9785	95.0681	95.0426	95.3788	95.4191	95.2817	95.2264	95.3261
5697	77.176	78.3821	80.1557	78.1117	94.9086	94.9807	95.0142	94.9922	95.164	95.0596	95.1118	95.031	95.0277	95.202	95.2653	95.3897	95.258	95.0556	95.0285	95.3793	95.5556	95.5582	95.4248	95.4243	95.4293	95.2324	95.439	100	99.8622	95.4719	95.5331	95.5462	95.3714	95.0994	95.1278	94.9619	94.6485	94.7352	94.715	95.0546	95.0876	95.0876	95.2272	95.2099	95.7074	95.6179	95.5122	95.3471	95.501
5690	77.4272	78.4963	80.256	78.3122	94.9439	94.9885	94.972	94.9424	95.1276	95.1512	95.048	95.0255	95.0255	95.1821	95.2448	95.3423	95.1938	95.0369	95.0782	95.3473	95.525	95.4926	95.451	95.4616	95.4134	95.3019	95.4836	99.8622	100	95.5282	95.4783	95.4995	95.3759	95.1165	95.1722	94.9591	94.6075	94.8012	94.754	95.0641	95.1018	95.0862	95.1783	95.1945	95.6859	95.641	95.5189	95.3705	95.5676
5703	77.3107	78.0179	80.5634	78.2379	94.8446	94.8395	94.9184	94.9314	94.9806	94.9328	94.9893	94.9449	94.9449	94.9855	95.034	95.1228	95.1289	94.9558	95.0836	95.1773	95.3733	95.3345	95.1639	95.1733	95.1961	95.0765	95.2825	95.4719	95.5282	100	95.2678	95.3037	95.2587	95.0312	95.1148	94.9651	94.6513	94.9127	94.8512	94.8098	95.0848	95.0848	95.1927	95.2044	95.557	95.3022	95.3781	95.1496	95.3069
5638	77.568	78.2115	79.6436	78.1385	94.8269	94.8153	94.921	94.9073	95.0325	94.9876	95.0086	94.9743	94.9743	95.0437	95.0474	95.04	95.0389	94.9357	94.8675	95.0805	95.5026	95.485	95.2431	95.1605	95.1658	95.0884	95.1927	95.5331	95.4783	95.2678	100	99.8798	95.2815	95.2814	95.2516	94.8669	94.6591	94.9784	94.9156	95.1024	95.1526	95.1526	95.1219	95.1595	95.4805	95.4481	95.4447	95.3616	95.6882
5619	77.606	78.2596	79.6496	78.2322	94.8279	94.8016	94.8928	94.8497	95.0618	94.9314	94.9836	94.9517	94.9517	94.9575	94.9863	95.0457	95.0287	94.9212	94.955	95.0992	95.536	95.5414	95.2259	95.2321	95.1902	95.1582	95.1425	95.5462	95.4995	95.3037	99.8798	100	95.2693	95.249	95.2244	94.9589	94.5855	94.9167	94.8803	95.1137	95.188	95.188	95.2167	95.1863	95.4608	95.399	95.4458	95.4262	95.6974
5709	77.7286	78.2348	80.5573	78.2219	94.6423	94.7463	94.8159	94.8636	94.9719	94.9369	94.9925	94.9034	94.8988	94.9031	95.0554	95.0593	94.9261	94.861	95.0334	95.1739	95.2575	95.2077	95.239	95.204	95.2359	95.1766	95.2825	95.3714	95.3759	95.2587	95.2815	95.2693	100	94.9805	94.9809	95	94.6333	95.0865	95.0089	95.0063	95.1088	95.1088	95.1183	95.1282	95.3911	95.4394	95.2878	95.1603	95.2009
5621	77.7353	78.4197	80.2669	78.2712	94.4034	94.5229	94.5353	94.6155	94.5538	94.4719	94.5249	94.4162	94.4162	94.5749	94.7031	94.6559	94.6862	94.5472	94.634	94.7743	94.9355	94.9278	94.8952	94.8897	94.8668	94.6729	94.8838	95.0994	95.1165	95.0312	95.2814	95.249	94.9805	100	99.9035	94.9723	94.7418	95.2516	95.2089	95.0169	95.3061	95.3061	95.1154	95.0738	95.0573	95.0448	94.9384	95.0704	95.0636
5617	77.742	78.3712	80.35	78.1443	94.4135	94.5071	94.6095	94.6579	94.5275	94.531	94.6484	94.4737	94.4737	94.7008	94.7104	94.74	94.6682	94.5845	94.7005	94.7676	95.015	94.9595	94.9192	94.8577	94.9016	94.7066	94.832	95.1278	95.1722	95.1148	95.2516	95.2244	94.9809	99.9035	100	95.0087	94.7455	95.2795	95.2286	95.1174	95.2937	95.2937	95.1039	95.1221	95.0764	95.1054	94.9679	95.0767	95.0641
5631	77.8317	78.1668	80.6573	78.2009	94.3648	94.5137	94.5155	94.5693	94.4971	94.4567	94.7251	94.6974	94.6974	94.5997	94.6311	94.6627	94.5818	94.6554	94.7592	94.6524	94.7202	94.6554	94.7838	94.832	94.8651	94.8343	94.8731	94.9619	94.9591	94.9651	94.8669	94.9589	95	94.9723	95.0087	100	94.784	95.1031	95.1103	95.1373	95.0699	95.0699	94.8078	94.8357	94.795	94.9303	94.8882	94.8331	94.8527
5649	77.5953	78.1893	79.8415	78.2525	94.2017	94.2681	94.2299	94.237	94.4651	94.3043	94.5197	94.29	94.29	94.4149	94.414	94.5849	94.4534	94.6702	94.7309	94.4397	94.4063	94.3897	94.4665	94.4103	94.4655	94.4059	94.4766	94.6485	94.6075	94.6513	94.6591	94.5855	94.6333	94.7418	94.7455	94.784	100	94.9472	94.8873	94.8329	94.8238	94.8238	94.6326	94.6073	94.5437	94.6652	94.5452	94.5297	94.4896
5704	77.6043	78.1061	80.0896	78.3429	94.2083	94.1529	94.2102	94.3177	94.3872	94.2742	94.4508	94.3156	94.3156	94.399	94.3616	94.4081	94.4436	94.5178	94.5578	94.4548	94.6557	94.7996	94.6144	94.6408	94.6168	94.6521	94.5765	94.7352	94.8012	94.9127	94.9784	94.9167	95.0865	95.2516	95.2795	95.1031	94.9472	100	99.8963	95.0107	95.299	95.299	94.9947	94.9837	94.6657	94.8754	94.7445	94.8775	94.8159
5702	77.5459	78.1732	80.0842	78.1327	94.2538	94.2452	94.1778	94.281	94.4254	94.2375	94.4713	94.3226	94.3226	94.4077	94.3846	94.3614	94.3757	94.5104	94.5903	94.4421	94.6017	94.6904	94.629	94.6473	94.5722	94.5886	94.5714	94.715	94.754	94.8512	94.9156	94.8803	95.0089	95.2089	95.2286	95.1103	94.8873	99.8963	100	95.0238	95.203	95.203	94.9247	95.0019	94.7284	94.7546	94.7741	94.8095	94.7795
5694	77.5761	78.5342	80.4145	78.3183	94.4078	94.4427	94.3811	94.4604	94.4761	94.5298	94.6197	94.4253	94.4253	94.5625	94.6321	94.6685	94.5484	94.6518	94.682	94.7483	94.8719	94.8411	94.8585	94.9092	94.9437	94.8226	94.8632	95.0546	95.0641	94.8098	95.1024	95.1137	95.0063	95.0169	95.1174	95.1373	94.8329	95.0107	95.0238	100	95.1152	95.1152	94.8662	94.9403	94.8974	95.0317	95.0163	95.0071	95.0318
5624	77.5179	78.0914	80.334	77.9863	94.51	94.4663	94.5484	94.5698	94.6091	94.6408	94.6921	94.4458	94.4458	94.6992	94.7262	94.779	94.6752	94.7418	94.8625	94.7967	94.9817	94.9577	94.9971	94.9846	94.9997	94.9076	94.9785	95.0876	95.1018	95.0848	95.1526	95.188	95.1088	95.3061	95.2937	95.0699	94.8238	95.299	95.203	95.1152	100	100	95.2269	95.1787	95.1601	94.982	94.9869	95.0584	95.1151
5623	77.5057	78.0914	80.334	77.9866	94.5158	94.4663	94.5484	94.5698	94.6091	94.6381	94.6921	94.4115	94.4115	94.7074	94.7262	94.779	94.6752	94.7418	94.8625	94.7967	94.9817	94.9577	94.9971	94.9846	94.9997	94.8891	94.9785	95.0876	95.0862	95.0848	95.1526	95.188	95.1088	95.3061	95.2937	95.0699	94.8238	95.299	95.203	95.1152	100	100	95.2269	95.1787	95.1601	94.982	94.9869	95.0584	95.1151
5715	77.7778	78.4053	80.684	78.1013	94.7423	94.7468	94.7357	94.8394	94.9432	94.8484	94.9432	94.7125	94.7078	94.9102	94.973	94.9485	94.8	94.7048	94.9222	95.0034	95.1998	95.2147	95.1189	95.0364	95.0464	94.8866	95.0681	95.2272	95.1783	95.1927	95.1219	95.2167	95.1183	95.1154	95.1039	94.8078	94.6326	94.9947	94.9247	94.8662	95.2269	95.2269	100	99.8964	95.3771	95.1012	95.1215	95.0483	95.2076
5713	77.7193	78.5511	80.6591	78.1308	94.7039	94.731	94.705	94.8021	94.8113	94.8029	94.896	94.7577	94.7577	94.8459	95.0236	94.9855	94.7878	94.768	94.9874	94.9668	95.1212	95.0961	95.1328	94.9656	94.9675	94.8856	95.0426	95.2099	95.1945	95.2044	95.1595	95.1863	95.1282	95.0738	95.1221	94.8357	94.6073	94.9837	95.0019	94.9403	95.1787	95.1787	99.8964	100	95.3997	95.125	95.1901	95.0483	95.1792
5701	77.8143	78.0631	80.2915	78.0429	95.0221	94.9046	94.9394	94.977	95.1626	95.1135	95.1153	95.0379	95.0379	95.1748	95.1989	95.1366	94.9791	94.9201	95.1568	95.2365	95.5296	95.5699	95.4013	95.3605	95.4256	95.2699	95.3788	95.7074	95.6859	95.557	95.4805	95.4608	95.3911	95.0573	95.0764	94.795	94.5437	94.6657	94.7284	94.8974	95.1601	95.1601	95.3771	95.3997	100	95.5135	95.5397	95.4027	95.548
5626	77.1991	78.044	80.3009	78.0316	94.9829	94.942	95.0758	95.0536	95.0943	95.154	95.1127	95.1149	95.1149	95.301	95.2544	95.3426	95.3006	95.0058	95.0471	95.2935	95.4885	95.5784	95.3517	95.5049	95.4583	95.3524	95.4191	95.6179	95.641	95.3022	95.4481	95.399	95.4394	95.0448	95.1054	94.9303	94.6652	94.8754	94.7546	95.0317	94.982	94.982	95.1012	95.125	95.5135	100	95.4604	95.3323	95.4314
5706	77.8764	78.5791	80.6203	78.4929	94.8669	94.8446	94.8477	94.8172	94.9799	94.878	94.9605	94.8948	94.8948	95.0584	95.1368	95.1308	94.9582	94.9174	95.0764	95.227	95.4575	95.3907	95.263	95.3031	95.3091	95.1788	95.2817	95.5122	95.5189	95.3781	95.4447	95.4458	95.2878	94.9384	94.9679	94.8882	94.5452	94.7445	94.7741	95.0163	94.9869	94.9869	95.1215	95.1901	95.5397	95.4604	100	95.5495	95.6276
5369	77.6984	78.3787	79.9505	78.1872	94.7386	94.7673	94.7958	94.7892	94.9789	94.9068	95.016	94.9689	94.9767	94.9709	95.0155	95.0753	94.9231	94.7866	94.8461	95.1977	95.3755	95.3162	95.1703	95.3117	95.2802	95.0988	95.2264	95.3471	95.3705	95.1496	95.3616	95.4262	95.1603	95.0704	95.0767	94.8331	94.5297	94.8775	94.8095	95.0071	95.0584	95.0584	95.0483	95.0483	95.4027	95.3323	95.5495	100	95.4884
5598	77.4627	78.2291	79.8521	78.2193	94.9439	94.7892	94.8874	94.9073	95.1436	95.0817	94.9893	95.0464	95.0419	95.0136	95.0974	95.1903	95.0708	95.0091	95.0465	95.2592	95.6347	95.6392	95.3036	95.3315	95.3616	95.251	95.3261	95.501	95.5676	95.3069	95.6882	95.6974	95.2009	95.0636	95.0641	94.8527	94.4896	94.8159	94.7795	95.0318	95.1151	95.1151	95.2076	95.1792	95.548	95.4314	95.6276	95.4884	100
5705	78.0005	78.3542	80.3293	78.1431	94.9185	94.7528	94.8224	94.8426	95.0889	94.9351	94.9782	94.9702	94.9702	94.8674	95.032	95.0706	95.0986	94.9057	95.0277	95.139	95.4872	95.4944	95.1693	95.194	95.1971	95.1628	95.2918	95.347	95.3593	95.1569	95.4221	95.354	95.1879	94.9129	94.9235	94.6736	94.6104	94.7199	94.7553	94.9291	94.9425	94.9212	95.005	95.0146	95.3368	95.4469	95.2426	95.2118	95.8204
5359	77.6531	78.3031	80.3361	78.1371	94.8031	94.7517	94.7517	94.7883	94.9595	94.9352	94.8756	94.841	94.841	94.9308	95.134	94.7637	94.7639	94.6379	94.5699	94.9321	94.689	94.7449	94.7712	94.773	94.7721	94.6918	94.7784	94.7564	94.6943	94.6495	94.4928	94.5671	94.5157	94.3326	94.3428	94.5844	94.1196	94.1649	94.218	94.4037	94.3718	94.3867	94.6339	94.7237	94.8026	94.7564	94.6689	94.6775	94.7326
5693	77.6737	78.4113	80.8235	78.195	94.938	94.9263	94.9387	94.7867	95.0175	95.0479	95.0712	95.1284	95.1284	95.1403	95.2888	94.8491	94.7381	94.6341	94.7413	95.0316	94.8584	94.8654	95.0969	94.8332	94.8866	94.802	94.9558	94.9763	94.9447	94.8204	94.8866	94.8118	94.6157	94.5329	94.5438	94.5051	93.9698	94.0867	94.1083	94.2269	94.5157	94.5157	94.7536	94.792	94.7828	94.9155	94.7542	94.7648	94.796
5696	77.5221	78.4716	80.7546	78.3604	94.8925	94.9039	94.9166	94.8321	95.0135	95.0058	95.0475	95.201	95.201	95.152	95.2203	94.7763	94.7142	94.5495	94.71	95.0366	94.8578	94.8727	95.0144	94.779	94.8689	94.7933	94.8531	94.879	94.9994	94.8105	94.8962	94.8041	94.573	94.4397	94.4121	94.5036	93.9573	94.0584	94.1627	94.2105	94.4747	94.4747	94.7244	94.8304	94.7515	94.9302	94.8389	94.7294	94.7944
5700	77.6415	78.2496	80.6621	78.3294	95.0135	94.9511	94.9269	94.9454	95.0699	95.1381	95.1582	95.2002	95.2002	95.1786	95.267	94.9624	94.916	94.7384	94.8419	95.0184	94.8721	94.8766	95.0462	94.8917	94.9311	94.8885	94.9907	94.9663	94.9033	94.7464	94.8543	94.6791	94.5832	94.4574	94.4296	94.534	94.1203	94.1971	94.2652	94.3166	94.5015	94.5015	94.8102	94.8633	94.9159	94.907	94.88	94.7302	94.8202
5680	77.628	78.4524	80.8155	78.4951	94.9146	94.9487	94.9268	94.8596	94.9958	95.0445	95.0893	95.1589	95.168	95.1418	95.2955	94.8587	94.8522	94.6569	94.6893	94.9303	94.7433	94.7609	94.9893	94.8104	94.9218	94.83	94.9907	94.9115	94.8788	94.7365	94.8421	94.7209	94.6179	94.4548	94.4018	94.5721	93.9819	94.1152	94.2195	94.29	94.3933	94.3967	94.6649	94.7542	94.8846	94.8792	94.8009	94.7475	94.8022
5681	77.6342	78.5005	80.7278	78.4695	94.9705	94.9312	94.9476	94.9749	95.0815	95.1352	95.1521	95.192	95.192	95.1873	95.3186	94.9853	94.9919	94.8212	94.7388	95.0815	94.9276	94.8832	95.0738	94.9352	94.9867	94.8735	95.1053	95.0308	95.0395	94.8502	94.9315	94.8318	94.6378	94.6031	94.5296	94.5283	94.0765	94.2114	94.2535	94.3765	94.5602	94.5602	94.7683	94.8625	94.8955	94.9725	94.8575	94.7982	94.8606
5685	77.6946	78.3318	80.6792	78.3927	95.0522	94.9532	94.995	94.9729	95.1061	95.1791	95.2279	95.217	95.217	95.2291	95.3396	94.8892	94.8819	94.7357	94.7771	95.0515	94.8563	94.8405	95.0148	94.896	94.9146	94.8114	94.9867	94.9284	94.969	94.7811	94.8852	94.8021	94.6155	94.4922	94.4705	94.5194	94.088	94.1987	94.2457	94.347	94.4964	94.4964	94.7077	94.7998	94.8593	94.942	94.8086	94.7199	94.8831
5687	77.6897	78.269	80.793	78.1617	95.0159	94.9544	94.9989	94.895	95.0922	95.0737	95.1691	95.1388	95.1388	95.0816	95.2686	94.9011	94.8386	94.6821	94.7996	95.051	94.8085	94.8188	95.0064	94.8006	94.8725	94.8061	94.9829	94.9186	94.9531	94.7597	94.8656	94.7396	94.5482	94.4643	94.4753	94.5393	94.035	94.1606	94.2063	94.3577	94.5229	94.5229	94.7531	94.8468	94.8298	94.9409	94.7396	94.6798	94.7476
5686	77.506	78.3562	80.7383	78.4068	94.9835	94.9106	94.8142	94.9284	95.0454	95.0086	95.0611	95.1237	95.1237	95.1937	95.252	94.8905	94.8647	94.6778	94.6501	94.9892	94.7789	94.8012	95.0087	94.7663	94.8218	94.826	94.993	94.8815	94.9623	94.7785	94.8742	94.7485	94.6241	94.5149	94.3961	94.473	94.0645	94.1048	94.2087	94.3226	94.44	94.44	94.7576	94.8155	94.8023	94.9144	94.8256	94.651	94.7638
5682	77.6035	78.4455	80.6023	78.2818	94.9778	94.9783	94.8997	94.9548	95.075	95.0222	95.1485	95.2119	95.2064	95.1385	95.2864	94.8427	94.8643	94.6764	94.707	95.052	94.8607	94.8149	95.0111	94.85	94.8672	94.8844	94.9563	94.9958	94.9941	94.8645	94.8452	94.7544	94.5557	94.4808	94.4501	94.4845	93.9736	94.12	94.2145	94.4201	94.5058	94.5058	94.7563	94.8288	94.8568	94.849	94.8421	94.7435	94.8283
5639	77.5254	78.0286	80.6098	78.41	94.9336	94.8741	94.8763	94.8761	95.0054	95.0239	94.9863	94.8806	94.8742	95.1521	95.1692	94.8622	94.6302	94.5857	94.6193	94.8818	94.8173	94.8181	94.9094	94.7588	94.8819	94.7633	94.9276	94.9581	94.971	94.655	94.6917	94.6365	94.6109	94.3602	94.3505	94.5944	94.0429	94.1055	94.1085	94.2557	94.4708	94.4708	94.7308	94.7596	94.6689	94.9282	94.7659	94.769	94.7387
5646	77.6602	78.3614	80.1622	78.2032	94.8848	94.7289	94.8931	94.9085	95.097	95.0227	95.0459	94.9677	94.9677	95.2083	95.158	94.8131	94.8593	94.5294	94.6788	95.0598	94.9916	94.9428	94.8862	94.8306	94.8385	94.9726	94.9728	94.8151	94.8437	94.7819	94.785	94.8443	94.8193	94.3373	94.3668	94.4667	93.9999	94.1123	94.0549	94.2908	94.3718	94.3589	94.6028	94.6453	94.8589	94.9222	94.6774	94.7191	94.8818
5652	77.8328	78.3186	80.2549	78.1762	94.8483	94.6834	94.8913	94.8036	95.0534	94.9751	95.0002	94.9675	94.9675	95.1208	95.1141	94.8504	94.7748	94.5271	94.6336	95.0314	94.9013	94.9476	94.8936	94.7716	94.8109	94.9391	94.9892	94.7815	94.8617	94.7847	94.8374	94.8071	94.7146	94.3423	94.319	94.4138	93.9592	94.06	94.0731	94.2855	94.3523	94.3674	94.5628	94.5768	94.9127	94.9621	94.7623	94.7285	94.8388
5698	77.33	78.0503	80.4751	77.9226	94.7742	94.854	94.8878	94.8708	95.0065	95.084	94.9855	95.0008	95.0046	95.1766	95.2595	94.9109	94.7707	94.6341	94.7436	94.8588	94.9039	94.8716	94.8599	94.9013	94.9935	94.8598	94.8786	95.0519	95.0628	94.8189	94.8575	94.8435	94.642	94.4946	94.421	94.5024	94.0988	94.1606	94.2388	94.3261	94.5769	94.5769	94.5906	94.5676	94.8483	94.8996	94.8545	94.7126	94.8917
5648	77.8528	78.6358	80.5081	78.5275	94.9831	95.0127	94.997	95.0161	95.1148	95.1536	95.0725	95.1534	95.1534	95.157	95.3379	95.0499	94.8843	94.6373	94.7032	94.9747	94.8494	94.9025	95.0215	94.9133	94.9474	94.8499	95.0047	94.9531	94.9991	94.7664	94.7577	94.6858	94.678	94.3517	94.3575	94.4995	93.9969	94.0524	93.9914	94.3265	94.4962	94.4962	94.6864	94.764	94.9488	94.933	94.7977	94.6298	94.8255
5642	77.8453	78.6589	80.6741	78.5567	94.9824	94.9223	94.946	95.0088	95.0705	95.2051	95.0668	95.1084	95.1055	95.1192	95.3316	95.0631	94.9328	94.6696	94.6835	95.0282	94.8116	94.897	95.0185	94.9096	94.9411	94.8354	94.9822	94.8821	94.916	94.7784	94.6556	94.633	94.6491	94.3086	94.3472	94.5284	94.068	94.0312	93.9691	94.4326	94.4906	94.4906	94.6535	94.7638	94.8757	94.8761	94.8114	94.6792	94.8555
5635	77.9875	78.6559	80.4805	78.5691	95.0003	94.9508	94.9488	94.9264	95.0634	95.1867	95.0791	95.1426	95.1426	95.1375	95.3926	95.0335	94.927	94.6258	94.7608	94.9862	94.8226	94.8666	94.9617	94.831	94.898	94.8118	95.0064	94.9502	94.9286	94.7104	94.6734	94.6552	94.663	94.4004	94.3754	94.5414	94.0439	94.012	93.9282	94.3276	94.3308	94.3308	94.6185	94.7048	94.8245	94.8933	94.8708	94.6031	94.785
5644	77.7993	78.7033	80.6027	78.4863	94.9651	94.957	94.9505	94.9863	95.0143	95.0522	95.0778	95.1668	95.1668	95.0931	95.3549	94.995	94.8671	94.7178	94.6324	95.0655	94.8153	94.8416	94.9216	94.8902	94.9091	94.7948	94.9983	94.9312	94.8965	94.7335	94.6582	94.6155	94.6498	94.3131	94.3031	94.4743	94.0628	94.0199	93.9987	94.3594	94.3487	94.3487	94.6526	94.7144	94.9035	94.924	94.8114	94.6445	94.7426
5641	77.8036	78.5277	80.6488	78.5159	94.9178	94.8584	94.9237	94.985	95.0516	95.1582	95.0692	95.0927	95.0927	95.0798	95.3684	95.0156	94.8737	94.6758	94.6803	95.0742	94.8892	94.8919	94.9237	94.8561	94.8929	94.8434	94.9926	94.9008	95.0096	94.6799	94.6928	94.6118	94.6345	94.3358	94.3564	94.4588	93.9794	94.0376	94.0221	94.3739	94.3926	94.3926	94.6645	94.7661	94.8951	94.9291	94.7284	94.6397	94.7927
5647	77.8527	78.6193	80.4185	78.4118	94.973	94.9069	94.914	94.9835	95.0381	95.1501	95.0816	95.1992	95.1992	95.1388	95.3182	95.0437	94.9512	94.7214	94.7816	95.0442	94.9075	94.8617	95.0305	94.8469	94.9399	94.8757	95.0508	94.9108	94.9955	94.7659	94.6999	94.7532	94.6904	94.3961	94.3883	94.517	94.0644	94.0895	94.074	94.4601	94.4464	94.4432	94.6907	94.7725	94.8472	94.8965	94.7835	94.5947	94.8311
5637	77.8445	78.5087	80.5182	78.3635	94.967	95.0083	95.0169	94.9872	95.0706	95.1804	95.0547	95.0881	95.0881	95.14	95.3648	95.0033	94.9893	94.6761	94.6569	94.9909	94.7937	94.8595	94.9583	94.8623	94.9334	94.8353	94.9848	95.0009	94.9818	94.7026	94.6639	94.6485	94.6843	94.4778	94.3755	94.5349	94.0151	94.0323	94.0458	94.3104	94.3455	94.3455	94.6385	94.7291	94.8247	94.9311	94.8253	94.6368	94.7931
5634	77.634	78.1685	80.7892	78.3064	94.9782	95.0164	95.058	94.9886	95.1611	95.1895	95.1783	95.2487	95.2487	95.2322	95.374	95.0387	95.0896	94.7047	94.7994	94.9916	94.8338	94.97	94.9983	95.0293	95.03	94.8821	95.1235	95.0629	95.007	94.8959	94.816	94.8308	94.7015	94.6314	94.5623	94.5765	94.0876	94.2637	94.2688	94.4052	94.6036	94.6036	94.7569	94.7496	94.9299	95.106	94.9075	94.7522	94.8619
5695	77.6706	78.389	80.1224	78.3432	95.0232	94.9684	94.9578	94.9479	95.1209	95.1485	95.1142	95.0328	95.0466	95.1657	95.2611	94.9351	94.6943	94.5246	94.7187	94.9355	94.9718	95.0205	94.9727	94.8938	94.901	94.7457	95.1603	94.9483	94.9314	94.9438	94.8584	94.8495	94.6789	94.4799	94.4694	94.4384	93.9569	94.0482	94.087	94.2305	94.5353	94.53	94.6717	94.7639	94.8126	95.0244	94.8198	94.6771	94.7747
5633	77.7302	78.1348	80.5372	78.6198	95.0169	95.0049	94.9708	94.972	95.1596	95.1561	95.0884	95.0378	95.0562	95.1894	95.3655	94.8965	94.9509	94.614	94.7882	95.0157	94.9706	94.9142	94.9994	94.9328	94.9269	94.8923	94.9999	95.0181	95.0878	94.8172	94.7899	94.8435	94.6181	94.4954	94.4171	94.5491	94	94.1499	94.1225	94.246	94.5497	94.5497	94.6855	94.8273	94.9516	94.907	94.8082	94.705	94.8709
5632	77.6714	78.1942	80.3829	78.7003	94.9544	94.8794	94.9251	94.9316	95.127	95.13	95.0816	95.0813	95.0847	95.1624	95.3161	94.9741	94.9027	94.6383	94.7481	95.0863	94.8733	94.8988	94.991	94.9122	94.8527	94.8939	94.9733	95.0277	95.106	94.8799	94.7838	94.7639	94.6286	94.4555	94.4914	94.5402	93.9824	94.1225	94.1289	94.2578	94.5381	94.5381	94.6981	94.7904	94.9417	94.9773	94.7793	94.7434	94.8196
5640	77.4466	78.5076	79.9242	78.2976	94.9358	94.7303	94.8453	94.8304	94.9905	94.9432	95.0746	95.1179	95.1179	95.0402	95.1176	94.8236	94.7523	94.5097	94.4984	94.9172	94.764	94.7719	94.7874	94.7149	94.8005	94.7787	94.8842	94.8854	94.8784	94.7017	94.6267	94.6422	94.5901	94.4035	94.3225	94.4449	93.9171	93.9957	94.0453	94.2291	94.2412	94.249	94.544	94.5768	94.5859	94.7966	94.6653	94.6559	94.7315
5645	77.5563	78.5534	79.9609	78.2781	94.8956	94.7754	94.8714	94.8388	94.9723	94.9024	95.0906	95.1143	95.1143	95.0065	95.1053	94.8615	94.8103	94.6091	94.5427	94.9215	94.7917	94.8266	94.7873	94.7332	94.7914	94.7366	94.8694	94.829	94.8078	94.6738	94.6537	94.674	94.59	94.4076	94.4072	94.3867	93.95	93.9268	93.9812	94.1539	94.2388	94.2388	94.5747	94.6361	94.6472	94.8699	94.64	94.6931	94.6983
5707	77.702	78.1952	80.4597	78.415	94.8924	94.8051	94.9105	94.8587	95.0412	95.1391	95.0999	95.0372	95.0372	95.0758	95.2279	94.8728	94.809	94.4861	94.6783	95.0519	94.7333	94.7852	94.9081	94.7795	94.8347	94.7653	94.9592	94.9035	94.9308	94.7194	94.7333	94.6721	94.5941	94.356	94.3032	94.3344	94.0074	93.8804	93.8227	94.3152	94.4219	94.4219	94.5739	94.6064	94.7827	94.8682	94.7148	94.5955	94.6665
5674	78.5067	79	80.2109	79.1417	88.7643	88.9126	88.9315	88.9817	88.8169	88.7381	88.7542	88.8115	88.8115	88.7623	88.6806	88.7364	88.7784	88.7078	88.6308	88.5276	88.633	88.5644	88.5306	88.4789	88.4431	88.517	88.6987	88.4426	88.598	88.5924	88.4332	88.4645	88.4358	88.4192	88.5056	88.5745	88.4821	88.3214	88.4759	88.5573	88.3324	88.3298	88.5983	88.635	88.5347	88.5764	88.4525	88.6415	88.5769
5679	78.5578	78.9188	79.8317	78.9988	88.7192	88.8308	88.893	88.9767	88.7944	88.738	88.5832	88.8005	88.7812	88.6632	88.637	88.6888	88.6526	88.5526	88.5221	88.4966	88.5794	88.5795	88.4929	88.3421	88.3701	88.5131	88.6282	88.4137	88.5106	88.4596	88.4468	88.3657	88.5068	88.3475	88.4791	88.5825	88.4367	88.2874	88.4478	88.4381	88.3695	88.367	88.5771	88.5909	88.6297	88.4417	88.4763	88.4261	88.286
5689	78.8099	79.9944	79.7597	79.8707	88.6858	88.8003	88.5944	88.7398	88.8573	88.6382	88.5975	88.7704	88.7704	88.698	88.6607	88.3749	88.5603	88.4666	88.5102	88.5068	88.5834	88.4883	88.2524	88.3371	88.3649	88.4274	88.5094	88.2875	88.2673	88.2343	88.4249	88.3898	88.3715	88.3225	88.4344	88.26	88.2485	88.3522	88.3481	88.2674	88.2579	88.2579	88.3241	88.5423	88.3057	88.4104	88.3776	88.3233	88.4969
5675	78.3557	79.4716	79.9564	79.2317	89.0449	88.7853	88.9814	89.0003	88.9496	88.7706	88.6824	88.8252	88.8252	88.8707	88.865	88.8654	88.7714	88.7365	88.6609	88.4926	88.6639	88.5785	88.4529	88.6706	88.6355	88.7682	88.7182	88.5527	88.7241	88.746	88.5092	88.5569	88.6435	88.6386	88.5673	88.5597	88.5743	88.4268	88.4657	88.6821	88.5636	88.5722	88.6548	88.8231	88.5714	88.7003	88.6638	88.529	88.6297
5676	78.9454	79.3049	80.039	79.2351	88.8874	89.1164	88.9086	88.9798	88.966	88.8763	88.8956	88.9221	88.9221	88.8638	88.7044	88.596	88.7529	88.6656	88.7166	88.582	88.7105	88.578	88.4562	88.5688	88.6095	88.7555	88.7438	88.5873	88.5575	88.6442	88.5321	88.6054	88.4433	88.4352	88.427	88.4029	88.5402	88.5182	88.6491	88.5966	88.4799	88.4799	88.5508	88.666	88.5663	88.5114	88.6002	88.6554	88.6037
5688	79.1308	79.2903	79.8839	79.441	89.0188	89.0767	89.0179	89.0493	89.1415	89.0779	88.9189	89.1423	89.1423	89.0405	89.0393	88.9407	89.0135	88.8849	88.8623	88.8837	88.8258	88.8289	88.6375	88.7951	88.8148	88.8783	88.8272	88.7877	88.6551	88.8796	88.6401	88.6299	88.6962	88.735	88.7166	88.6133	88.769	88.728	88.8042	88.8623	88.625	88.625	88.8071	88.8965	88.8777	88.7782	88.9371	88.9283	88.7435
5692	79.2019	79.237	79.6654	79.6605	88.9477	89.2145	89.0144	89.0287	89.2091	89.0235	88.9716	89.169	89.169	89.0347	88.899	88.8949	88.9743	88.921	88.8891	88.812	88.8774	88.8873	88.7038	88.7598	88.8004	88.6872	88.8638	88.7841	88.7732	88.8441	88.7937	88.6578	88.68	88.6761	88.7119	88.5971	88.752	88.7001	88.8684	88.8232	88.6782	88.6782	88.795	88.8529	88.8453	88.755	88.9019	88.8995	88.8701
5653	78.5059	79.2309	80.5561	79.0355	88.7065	88.9337	88.8246	88.8779	88.7664	88.8335	88.7475	88.691	88.6761	88.7878	88.7741	88.7663	88.6349	88.5754	88.6443	88.4254	88.4036	88.4127	88.5678	88.6212	88.6247	88.4891	88.6751	88.4912	88.5304	88.4629	88.5452	88.5363	88.4111	88.4189	88.4214	88.4437	88.303	88.1626	88.3274	88.5179	88.4487	88.4345	88.4499	88.468	88.6139	88.4409	88.588	88.5182	88.4056
5650	78.8128	79.3925	79.9949	79.4954	88.8308	88.8288	88.8302	89.0462	88.7579	88.6744	88.643	88.8527	88.8277	88.7203	88.8695	88.6996	88.6823	88.5287	88.5571	88.6147	88.6478	88.6341	88.6133	88.4692	88.4875	88.3957	88.6036	88.4514	88.533	88.4876	88.534	88.4685	88.3618	88.4204	88.5235	88.5333	88.3794	88.361	88.4271	88.49	88.2222	88.2195	88.6459	88.7744	88.6764	88.5228	88.6425	88.4496	88.5808
5651	78.8698	79.3682	79.9637	79.4133	88.8473	88.7619	88.899	88.9356	88.8394	88.6572	88.6885	88.8068	88.8068	88.735	88.6628	88.6332	88.7068	88.6064	88.6174	88.5139	88.6194	88.6051	88.5643	88.3645	88.4318	88.3465	88.5276	88.4007	88.4413	88.4384	88.4889	88.4362	88.4708	88.454	88.4561	88.3889	88.4196	88.3459	88.4389	88.4204	88.1716	88.1716	88.5582	88.7389	88.5841	88.4416	88.5765	88.4312	88.4648
5667	78.5377	79.1574	79.8018	79.847	88.8043	88.7638	88.8829	88.9824	88.8511	88.7928	88.6538	88.8143	88.8143	88.76	88.7102	88.6342	88.6788	88.5309	88.6058	88.5136	88.3862	88.4741	88.3495	88.4741	88.5074	88.4702	88.6135	88.4388	88.5083	88.5187	88.4861	88.3777	88.4293	88.3207	88.3479	88.2726	88.1863	88.3469	88.4504	88.5442	88.4895	88.4754	88.3388	88.4146	88.5303	88.4988	88.4806	88.4445	88.3546
5671	78.8878	79.0962	80.5259	79.3156	88.8836	89.0267	89.0956	89.0673	88.7792	89.0266	88.655	88.7525	88.7525	88.8932	88.8745	88.7116	88.7031	88.5923	88.6716	88.6183	88.5046	88.5461	88.6441	88.6133	88.5117	88.4681	88.7092	88.5185	88.6349	88.5513	88.4218	88.3879	88.5477	88.5315	88.6543	88.6366	88.2778	88.3542	88.6012	88.5128	88.4709	88.4709	88.6203	88.6796	88.6996	88.5766	88.6861	88.5196	88.5553
5677	78.9342	79.2333	79.8496	79.095	88.8562	88.9155	88.9393	89.0203	88.7117	88.6062	88.5682	88.6981	88.6816	88.5489	88.5862	88.5769	88.6445	88.5636	88.4283	88.5573	88.602	88.536	88.377	88.3754	88.3923	88.4844	88.5359	88.4365	88.4786	88.5246	88.4269	88.4514	88.3514	88.4468	88.4325	88.4593	88.4836	88.4281	88.4978	88.3061	88.4162	88.4162	88.4265	88.5892	88.5133	88.4428	88.5569	88.5717	88.4578
5684	79.1049	78.965	79.8595	79.6664	88.9429	88.7345	88.8564	88.9938	88.8959	88.8285	88.8643	88.8658	88.8561	88.8304	88.9569	88.8453	88.8261	88.6779	88.6551	88.5293	88.678	88.6583	88.5128	88.6031	88.5303	88.5843	88.7664	88.4964	88.5432	88.5963	88.4644	88.574	88.4858	88.3113	88.3882	88.4299	88.4008	88.2816	88.4073	88.4194	88.3831	88.3985	88.4514	88.5332	88.732	88.568	88.6045	88.4681	88.6417
5655	78.5606	78.7714	79.6768	79.0483	89.2575	89.3143	89.2258	89.4484	89.3344	89.2896	89.3545	89.2776	89.2833	89.5015	89.2189	89.1526	89.4021	89.0109	88.9885	89.1133	88.9892	89.1281	88.8516	89.2685	89.1252	89.0015	89.1101	89.0689	88.9166	88.9607	89.0028	88.7966	88.9302	88.7835	88.7547	88.7511	88.7644	88.949	88.9946	88.8937	88.7456	88.7456	88.8399	88.9737	89.1759	89.2422	89.1513	88.917	88.9562
5670	78.6429	78.7211	79.4801	79.1216	89.4116	89.3794	89.3899	89.4516	89.4078	89.3601	89.3225	89.3522	89.3522	89.2152	89.2956	89.1172	89.1842	89.0682	89.0158	89.0486	89.0546	88.8984	88.9657	89.0913	89.1115	89.0585	89.0582	89.0615	89.04	88.9171	88.9612	88.8844	88.8761	88.8316	88.8237	88.7634	88.8045	88.7026	88.86	89.0319	88.7718	88.7595	88.878	88.9639	89.1455	88.9918	89.0859	88.8957	88.968
5612	78.5717	78.614	79.5727	79.0787	89.3442	89.4371	89.3002	89.4082	89.4208	89.3787	89.2058	89.2705	89.2587	89.1786	89.3032	89.0729	89.2541	89.1213	88.9964	88.9534	89.0046	89.0121	88.8081	89.1394	89.1617	89.027	89.0615	88.9936	89.0153	88.9359	88.9506	88.8371	88.9194	88.8063	88.8663	88.7942	88.7581	88.5533	88.7364	89.0297	88.7306	88.7397	88.8618	88.8821	89.1304	89.0887	89.1079	88.8773	88.9658
5665	78.6064	78.7983	79.6318	79.0518	89.4142	89.4426	89.2672	89.4961	89.3288	89.3131	89.3314	89.341	89.3272	89.2623	89.3259	89.0943	89.1763	89.0665	88.9333	89.0781	88.9722	88.9575	88.8893	89.1098	89.2449	89.0299	89.0773	89.1051	89.0743	88.9655	88.9593	88.8165	89.0152	88.8206	88.8112	88.7697	88.8065	88.6665	88.8073	88.863	88.8086	88.7958	88.8301	88.9371	89.179	88.9765	89.0994	89.0373	89.0064
5669	78.4994	78.6379	79.6255	79.0896	89.329	89.443	89.2288	89.4647	89.3835	89.341	89.36	89.2328	89.2279	89.1953	89.2516	89.1924	89.2482	89.159	89.0689	89.1147	89.0135	88.8853	88.9459	89.1001	89.0851	88.9924	89.1087	89.0692	89.116	88.9845	88.9871	88.8402	89.021	88.7889	88.8169	88.779	88.8073	88.6486	88.8917	88.9793	88.8712	88.8712	88.9369	88.9779	89.2255	88.9568	89.0728	89.0224	88.9891
5664	78.5872	78.8661	79.3873	79.1474	89.272	89.4072	89.2622	89.3625	89.419	89.2766	89.2547	89.3039	89.3039	89.1711	89.3826	89.1519	89.2196	89.1459	89.0198	89.0492	88.9814	88.8835	88.9475	89.0499	89.0288	89.0284	88.9437	89.0655	88.9862	88.9828	88.853	88.828	88.8936	88.7449	88.795	88.7456	88.7312	88.6395	88.8112	88.9448	88.7298	88.7259	88.8208	88.9951	89.1415	89.011	88.9972	88.8581	88.9241
5659	78.7091	78.7189	79.5982	78.9957	89.3158	89.4665	89.2757	89.4045	89.3984	89.2836	89.2559	89.2699	89.261	89.4115	89.3747	89.0734	89.3688	89.1501	88.9888	89.0848	89.0409	89.1081	88.9519	89.355	89.1617	89.0384	89.0871	89.056	89.0375	89.0135	88.997	88.8977	88.9339	88.8337	88.835	88.7594	88.7537	88.8995	89.0404	88.9788	88.6945	88.6945	88.857	89.0264	89.1798	89.1858	89.1166	89.0074	88.9655
5660	78.5973	78.7593	79.6134	79.0098	89.3282	89.4316	89.2211	89.4282	89.3315	89.346	89.2832	89.3243	89.3243	89.5498	89.305	89.043	89.5073	89.0786	88.9222	89.026	88.9116	89.1294	88.8489	89.329	89.0748	89.0901	89.0725	89.0198	89.0724	88.9447	88.8754	88.8457	89.0047	88.8209	88.8213	88.8258	88.7381	88.9133	89.0704	89.0302	88.7336	88.7336	88.8196	89.0361	89.1271	89.1854	89.0654	89.0166	88.9379
5661	78.6168	78.7327	79.566	79.0305	89.2968	89.2666	89.3607	89.4618	89.3817	89.3908	89.3144	89.3087	89.3087	89.2452	89.3137	89.2026	89.281	89.1121	89.0541	89.0955	88.9646	88.9785	88.8333	89.111	89.0809	89.0675	89.0518	88.9872	88.987	88.9324	88.8729	88.7631	88.9669	88.7636	88.8409	88.8182	88.7604	88.7836	88.979	88.9849	88.8491	88.8611	88.8726	88.9968	89.122	89.0693	89.081	88.8851	88.9051
5613	78.5572	78.5633	79.7524	79.1411	89.3168	89.4618	89.3926	89.49	89.4248	89.3959	89.3246	89.2958	89.2958	89.2768	89.335	89.2317	89.3636	89.1774	89.1351	89.147	89.0014	88.9823	88.9386	89.211	89.1889	89.0585	89.0798	89.0357	89.1376	89.0932	89.0413	88.8729	89.0387	88.869	88.872	88.8805	88.8525	88.8595	88.9423	89.0501	88.8519	88.8519	88.9001	88.994	89.2552	89.1947	89.2627	89.0188	89.0851
5362	79.4197	79.8227	80.6233	78.4868	88.8522	88.855	88.9279	89.0705	88.9708	88.9324	88.8411	88.8191	88.8303	88.928	88.9288	88.7689	88.7429	88.8718	88.6157	88.6824	88.6962	88.7363	88.6304	88.7343	88.846	88.6052	88.7908	88.4434	88.536	88.5608	88.5635	88.5383	88.5721	88.4956	88.4567	88.3627	88.3946	88.401	88.4903	88.5682	88.4868	88.4722	88.4862	88.5848	88.6586	88.634	88.7329	88.6616	88.6934
5398	78.7674	79.037	80.8565	79.3412	88.8142	88.8444	88.8558	88.8732	88.7513	88.806	88.7359	88.8234	88.8234	89.0505	88.7928	88.7195	88.8171	88.7673	88.7223	88.6042	88.5617	88.5301	88.698	88.5927	88.6363	88.509	88.878	88.6789	88.7633	88.7552	88.6855	88.6977	88.758	88.6738	88.7226	88.7391	88.5089	88.5884	88.6311	88.6696	88.753	88.753	88.6837	88.8145	88.6314	88.5154	88.64	88.6206	88.6128
5672	78.8371	79.0132	80.6815	79.2463	89.0176	89.1144	89.1761	89.1163	88.8982	88.9397	88.7793	88.9045	88.9045	89.0889	88.9283	88.7805	88.9255	88.8319	88.9685	88.825	88.8156	88.7886	88.8481	88.7976	88.7739	88.7803	88.8385	88.8136	88.8315	88.8668	88.818	88.8115	88.7878	88.977	88.9494	88.9704	88.5976	88.7201	88.6663	88.7968	88.831	88.831	88.9044	88.9447	88.7877	88.7199	88.8518	88.7339	88.8737
5673	78.7098	78.9195	80.6276	79.2814	88.9988	89.1434	89.074	89.0903	88.801	88.9897	88.8426	88.9005	88.9005	88.9775	88.9688	88.9448	88.8333	88.8428	88.9651	88.7496	88.7594	88.7737	88.8568	88.7075	88.7137	88.5856	88.8526	88.846	88.8926	88.8226	88.7291	88.7305	88.7802	88.7606	88.9065	88.8928	88.6488	88.7091	88.6463	88.7832	88.7891	88.7862	88.8474	88.977	88.902	88.698	88.8042	88.7294	88.7252
5654	79.7209	80.2952	81.827	79.7517	88.8083	89.1012	88.8924	88.9359	88.7623	88.8829	88.6914	88.6681	88.6761	88.9144	88.7743	88.7206	88.7236	88.8165	88.8735	88.5621	88.7156	88.6344	88.6842	88.8049	88.8252	88.5925	88.7117	88.6531	88.7969	88.6542	88.6739	88.6049	88.7193	88.6878	88.78	88.724	88.6369	88.5899	88.6389	88.5719	88.7129	88.7074	88.9089	88.8959	88.7739	88.5757	88.7393	88.6317	88.6421
5656	79.6428	80.1081	81.5711	79.6014	88.7874	89.0609	88.9543	88.9276	88.6709	88.7812	88.714	88.7604	88.7618	88.9291	88.7328	88.7508	88.691	88.7608	88.8131	88.7176	88.7167	88.6913	88.6879	88.7411	88.8672	88.5133	88.756	88.6059	88.7262	88.6402	88.6583	88.5376	88.7701	88.7226	88.7245	88.7385	88.516	88.5816	88.6288	88.6593	88.6924	88.6924	88.8	88.8412	88.7704	88.5814	88.8125	88.6224	88.7173
5658	79.7225	80.3433	81.6542	79.7307	88.9204	89.1024	88.974	89.0543	88.6449	88.8916	88.6931	88.7351	88.7351	88.9617	88.9128	88.8465	88.6932	88.776	88.8422	88.7339	88.7868	88.7472	88.7604	88.8347	88.8899	88.5989	88.7705	88.655	88.764	88.6904	88.7105	88.6926	88.7284	88.6244	88.7823	88.7741	88.5807	88.5952	88.6363	88.6087	88.6976	88.6976	88.8459	88.9744	88.8209	88.5998	88.8202	88.5347	88.6693
5610	79.8237	80.3197	81.6685	79.5701	88.8245	88.9572	88.8618	88.9712	88.6935	88.8227	88.6717	88.8254	88.8036	88.8067	88.7688	88.8531	88.648	88.6669	88.7241	88.613	88.7872	88.8209	88.72	88.7927	88.8292	88.5008	88.7376	88.7081	88.7876	88.6988	88.7209	88.5956	88.7329	88.7153	88.7779	88.8272	88.5886	88.6317	88.5886	88.5163	88.7812	88.7963	88.7771	88.9352	88.7311	88.5506	88.7096	88.6514	88.5679
5353	78.2657	78.15	78.1617	78.3498	78.5622	78.3599	78.4433	78.5283	78.2592	78.7885	78.2371	78.4643	78.4643	78.507	78.3381	78.4252	78.5024	78.5575	78.7141	78.5094	78.51	78.456	78.533	78.252	78.2715	78.4914	78.4565	78.4487	78.4967	78.5442	78.3607	78.3097	78.5107	78.39	78.4647	78.3701	78.5647	78.4496	78.408	78.494	78.2077	78.2077	78.546	78.7597	78.4797	78.3133	78.5511	78.5126	78.4314
5370	78.1715	78.2373	78.2721	78.2932	78.2715	78.2545	78.1674	78.3409	78.0679	78.3324	78.0848	78.013	78.0065	78.3685	78.1323	78.517	78.1866	78.3035	78.2942	78.1073	78.2398	78.2542	78.1615	77.9718	77.9529	78.3897	78.2408	78.1405	78.1706	78.2493	78.1745	78.201	78.3207	78.0603	78.0868	78.1675	78.2409	78.3458	78.216	78.3042	78.1915	78.1853	77.9956	78.096	78.4586	78.1781	78.2841	78.3019	77.9841
5376	77.0908	76.7824	77.0751	77.3209	77.4789	77.6832	77.6784	77.621	77.5622	77.6376	77.5163	77.6532	77.653	77.3957	77.5676	77.5965	77.6802	77.607	77.6138	77.5071	77.3295	77.3398	77.5936	77.6144	77.5733	77.3763	77.6091	77.4659	77.7999	77.5254	77.4112	77.5014	77.5004	77.5246	77.471	77.5661	77.4557	77.656	77.8099	77.7283	77.6465	77.6432	77.5936	77.5927	77.6893	77.7831	77.9178	77.4254	77.4297
6401	0.1	0.1	0.1	0.1	77.2037	77.4625	77.1907	77.1839	77.3208	77.0679	77.0651	77.1289	77.1289	77.1815	77.0933	77.1467	77.0628	77.0599	77.1893	76.9525	77.1522	77.1571	76.8318	77.0894	77.1494	77.209	76.9265	77.2562	77.3506	77.4555	77.3453	77.3847	77.3366	77.0936	77.0829	77.237	77.1261	76.8987	77.1588	77.2621	77.1899	77.1899	77.0434	77.1889	77.2086	77.2174	77.088	77.477	77.0652
6400	0.1	0.1	0.1	0.1	77.4958	77.2501	77.3595	77.358	77.251	77.4225	77.2324	77.3322	77.3322	77.1702	77.285	77.154	76.7142	77.0774	77.0968	77.0094	77.1579	77.172	77.3285	77.078	77.3353	77.2837	77.5422	77.3211	77.6573	77.1053	77.0483	77.1472	77.1228	77.2967	77.3558	77.284	77.1609	77.2441	77.1358	77.3231	77.1526	77.1847	76.9869	77.4502	77.377	77.1633	77.4135	77.5204	76.9196
6395	0.1	0.1	0.1	0.1	77.3372	77.142	77.4217	77.6163	77.3883	77.2852	77.0839	77.2344	77.2344	77.2	77.3224	77.1702	76.7935	77.0445	77.2196	77.0936	76.8623	76.8867	77.138	76.9409	77.1464	77.2877	77.6022	77.1592	77.4401	77.1887	77.2706	77.228	77.1925	77.2306	77.3376	77.4353	77.0766	77.3736	77.3951	77.3577	77.2894	77.2726	76.9665	77.5949	77.2452	77.1055	77.299	78.0919	77.0221
6394	0.1	0.1	0.1	0.1	77.449	77.1496	77.2894	77.5257	77.4667	77.2564	77.0363	77.305	77.3077	77.1948	77.5073	77.3784	76.9837	77.1693	77.0669	77.0983	77.0617	77.1049	77.1457	77.412	77.4782	77.0883	77.462	77.2467	77.7108	77.2308	77.2812	77.2703	77.1586	77.2078	77.2946	77.2884	77.219	77.5453	77.4696	77.5424	77.2824	77.2847	77.1429	77.6417	77.3281	77.1908	77.4187	77.931	77.0218
6393	0.1	0.1	0.1	0.1	77.4232	77.2093	77.2837	77.5129	77.4023	77.349	77.2266	77.2144	77.1965	77.1142	77.2906	77.2436	76.7716	77.0836	77.346	77.0892	77.0493	76.9274	77.3153	77.0028	77.2224	77.1325	77.3766	77.0676	77.5262	77.0864	77.076	77.092	77.0227	77.1169	77.2956	77.2643	77.1456	77.2605	77.2235	77.2408	77.0871	77.0872	76.996	77.5027	77.4687	77.1345	77.3754	77.8192	76.8914
6399	0.1	0.1	0.1	0.1	77.1887	77.0701	77.3452	77.2049	77.1863	76.9472	77.2694	77.272	77.2904	76.9805	77.1778	77.2033	76.9639	77.1305	77.0291	77.137	77.1808	77.2231	77.3825	77.2798	77.3554	77.3473	77.2762	77.3631	77.5201	77.2557	77.0934	77.1798	77.2656	77.1631	77.3059	77.2761	77.2462	77.1292	77.3842	77.1536	77.3873	77.3684	77.0946	77.2893	77.3295	77.155	77.0831	77.2484	77.1326
6398	0.1	0.1	0.1	0.1	77.5579	77.1214	77.5509	77.4239	77.4125	77.3886	77.3996	77.4615	77.4832	77.3115	77.4818	77.2417	76.9875	77.1535	77.196	77.2302	77.1728	77.2356	77.3052	77.2186	77.3199	77.3081	77.4081	77.2262	77.5567	77.1815	77.2177	77.2922	77.1123	77.2079	77.3026	77.3663	77.1654	77.1948	77.1487	77.3372	77.217	77.217	77.1968	77.6095	77.3815	77.063	77.4039	77.7485	76.9857
6397	0.1	0.1	0.1	0.1	77.4179	77.4162	77.435	77.343	77.5096	77.3697	77.21	77.5827	77.5827	77.4004	77.4153	77.3905	77.1381	77.198	77.373	77.2338	77.2333	77.2035	77.2393	77.0905	77.3775	77.3817	77.3818	77.3317	77.5818	77.2757	77.2464	77.474	77.1416	77.2641	77.1707	77.575	77.2367	77.2081	77.1786	77.7472	77.2639	77.2639	77.3432	77.8066	77.4669	77.1538	77.3672	77.4648	77.1348
6396	0.1	0.1	0.1	0.1	77.3071	77.3071	77.302	77.2143	77.2067	77.2295	77.3434	77.165	77.202	77.1018	77.2607	77.106	76.8908	77.0458	77.137	77.0836	77.0775	77.0899	77.3394	77.0073	77.2278	77.3028	77.1897	77.2357	77.4459	77.3977	77.4736	77.6234	77.3066	77.3465	77.3911	77.4056	77.0636	77.191	77.3004	77.2035	77.2913	77.2913	77.2066	77.3126	77.2176	77.3945	77.1318	77.3216	77.0626
6362	0.1	0.1	0.1	0.1	77.5156	77.2313	77.3503	77.4571	77.4337	77.6593	76.9748	0.1	0.1	76.8718	77.6836	77.2362	77.0665	77.0389	76.8571	77.1309	77.1606	77.1441	76.8281	76.9242	77.0972	77.2649	77.4424	77.2532	77.6402	77.1018	77.0812	77.0602	76.9353	76.9704	77.0084	77.073	77.1006	77.1373	76.918	0.1	76.9657	76.9657	77.1008	77.3191	77.5096	77.0573	77.6151	77.8474	76.993
6385	0.1	0.1	0.1	0.1	77.6196	77.1271	77.2931	77.4551	77.3855	77.5061	76.9271	77.2596	77.2868	77.0599	77.1185	77.6228	77.2262	77.0847	76.9889	77.1955	77.0459	77.1767	76.9255	77.0169	77.2237	77.2872	77.3582	77.243	0.1	77.3183	77.0161	77.1347	77.1545	77.2277	0.1	0.1	0.1	77.2013	77.198	0.1	76.9331	76.9331	77.1405	77.436	77.362	77.066	0.1	77.2346	77.2013
6374	0.1	0.1	0.1	0.1	77.4553	77.2401	77.5837	77.6998	77.6625	77.5483	77.0545	77.1795	77.2262	76.9634	77.156	77.3941	77.2849	77.1909	77.1815	0.1	77.3331	77.3571	76.9603	76.981	77.2126	77.4035	77.1029	77.3256	77.3601	77.4309	0.1	77.1957	77.0373	76.7184	76.8224	77.2778	76.9673	77.3709	77.3665	77.4881	76.9682	76.9682	77.2317	77.4977	77.8062	77.2246	0.1	77.232	77.2155
6387	0.1	0.1	0.1	0.1	0.1	77.2548	77.3463	77.3657	77.6806	77.7	77.0447	77.4708	77.4708	76.8232	77.5518	77.5211	77.0399	77.2313	77.0287	0.1	77.1779	77.2725	77.0651	77.1429	77.2823	77.0402	77.0143	77.2875	77.7422	0.1	77.4089	77.3872	77.2767	77.0384	77.0034	77.2879	77.1087	77.3098	77.0561	77.2279	76.9876	76.9876	77.1791	77.6932	77.7118	77.347	77.8833	77.5989	77.296
6384	0.1	0.1	0.1	0.1	0.1	77.4039	77.4899	0.1	77.852	77.6846	0.1	77.3107	77.3107	0.1	0.1	0.1	77.0823	0.1	76.9761	0.1	77.2008	0.1	77.0224	76.77	77.1902	0.1	0.1	77.1119	0.1	0.1	0.1	0.1	0.1	0.1	0.1	77.1798	0.1	76.8537	76.7983	0.1	0.1	0.1	0.1	0.1	0.1	0.1	0.1	77.6257	0.1
6377	0.1	0.1	0.1	0.1	0.1	0.1	77.1666	77.42	77.3328	77.3889	77.1278	77.2219	77.2219	0.1	76.8926	77.081	77.1371	77.4358	77.0068	0.1	76.9483	76.923	76.9405	76.9232	76.9211	77.2969	77.165	0.1	0.1	77.4706	0.1	0.1	77.1538	76.9979	76.9876	0.1	0.1	0.1	0.1	77.1982	0.1	0.1	0.1	0.1	77.299	77.6267	0.1	77.1493	77.1429
6368	0.1	0.1	0.1	0.1	0.1	0.1	0.1	0.1	77.2935	0.1	77.1633	77.1244	77.1244	0.1	77.0851	76.9953	77.1061	76.9133	77.1967	0.1	77.1741	77.2655	77.0969	77.101	77.2198	0.1	76.7912	0.1	0.1	0.1	0.1	77.0754	76.9731	77.0597	76.7378	0.1	76.7049	0.1	0.1	0.1	0.1	0.1	0.1	0.1	77.7113	77.0968	0.1	76.9752	0.1
6369	0.1	0.1	0.1	0.1	0.1	77.5808	77.4042	77.4344	77.6265	77.3908	77.2627	77.247	77.247	77.0663	77.2936	77.192	77.1291	77.0591	77.0365	77.0552	77.1687	77.3637	77.142	76.8281	77.1273	77.5119	77.082	77.2077	77.3019	77.5512	0.1	77.3163	77.2556	77.0402	77.0496	77.1133	77.3225	76.9049	76.9893	76.9932	0.1	0.1	77.4308	0.1	77.4422	77.5223	0.1	77.1789	77.1613
6363	0.1	0.1	0.1	0.1	0.1	77.4758	77.7538	77.0738	77.5229	77.5294	77.0571	77.1037	77.1037	77.8809	77.2248	77.31	77.2217	77.1281	77.1728	0.1	77.364	77.4914	77.3998	0.1	77.4963	77.8502	77.081	76.9462	0.1	77.4614	0.1	77.5613	0.1	76.6272	76.6705	77.2512	77.2227	76.9963	76.9712	0.1	77.3407	77.3407	77.4968	0.1	77.471	77.4321	0.1	77.3351	77.0665
6365	0.1	0.1	0.1	0.1	0.1	0.1	77.2593	0.1	77.4642	77.5152	77.2427	77.32	77.32	0.1	77.1449	77.0553	0.1	77.2981	77.0395	0.1	77.3231	77.3884	77.0427	77.2387	77.2386	77.5415	77.0038	77.003	0.1	77.5528	0.1	77.6256	0.1	77.2002	0.1	0.1	0.1	77.2386	0.1	0.1	77.4082	77.4082	0.1	77.2965	0.1	77.5245	0.1	77.202	0.1
6364	0.1	0.1	0.1	0.1	0.1	77.3146	77.2441	77.1511	77.4523	77.4976	77.0187	77.1751	77.1751	77.455	77.2775	76.8892	77.2189	77.2262	77.2327	0.1	77.2782	77.2745	76.9274	77.1816	0.1	77.4809	77.0505	76.858	77.1063	77.4155	77.5393	77.4721	77.2403	76.8476	77.0333	77.0514	0.1	77.148	77.0226	0.1	77.2118	77.2118	77.3428	0.1	77.1138	77.5482	0.1	77.1554	0.1
6366	0.1	0.1	0.1	0.1	77.5797	77.2422	77.254	77.1903	77.3466	77.626	77.1923	77.1187	77.1187	77.3946	77.2009	77.1025	77.2195	77.4907	77.3242	77.2402	77.177	77.16	77.098	77.1029	77.2094	77.4758	77.16	77.1402	77.2091	77.4713	0.1	77.4661	77.4314	77.2075	77.1529	77.1189	0.1	77.1156	77.2118	77.4708	77.2357	77.2357	77.371	77.0878	77.5601	77.479	0.1	77.225	77.2988
6367	0.1	0.1	0.1	0.1	0.1	77.2064	77.1923	77.0176	77.1522	77.3432	76.9668	0.1	0.1	77.1549	77.1009	77.1071	77.195	77.1373	77.1481	0.1	77.3376	77.4843	76.9812	76.9065	77.1758	77.141	77.0429	77.145	77.3335	0.1	77.1676	77.1733	77.1215	77.0499	76.9424	77.0795	77.016	76.7517	76.7832	76.8298	77.2431	77.2431	77.1639	77.0453	77.359	77.2726	0.1	77.1355	0.1
6381	0.1	0.1	0.1	0.1	0.1	77.1951	77.5829	77.6303	77.4101	77.4232	76.9121	77.2728	77.2728	77.1266	77.5721	77.3828	77.1356	77.1962	77.0988	77.0797	77.3042	77.3168	77.0724	76.9849	77.0798	77.2153	77.4623	77.3023	77.2107	77.4062	77.2121	77.2948	77.3573	76.9733	76.8415	77.2672	77.0354	77.1966	77.2109	77.3203	77.1721	77.1721	77.1905	77.5172	77.7632	77.2923	0.1	77.1939	77.374
6380	0.1	0.1	0.1	0.1	0.1	77.2896	77.6261	0.1	77.6553	77.4656	77.1659	77.1328	77.1328	77.1338	77.4693	0.1	77.2666	77.1921	77.1235	0.1	77.262	77.372	77.0166	77.1645	77.2601	77.458	77.7123	77.4715	0.1	77.4612	77.0756	77.1136	77.6481	77.0506	76.9376	77.2834	77.1672	77.114	77.1597	77.334	0.1	0.1	77.2139	77.5188	0.1	77.1533	0.1	77.4455	77.3995
6373	0.1	0.1	0.1	0.1	0.1	77.3617	77.4336	77.3447	77.4765	77.3629	0.1	0.1	0.1	76.9377	77.0414	77.3986	0.1	76.9625	76.9891	0.1	76.971	77.3648	76.9715	76.7864	0.1	0.1	77.3573	77.2118	77.5888	77.2017	0.1	0.1	0.1	76.8065	76.9727	0.1	76.9822	0.1	0.1	0.1	0.1	0.1	76.7563	77.1627	77.4493	76.9194	0.1	77.9023	0.1
6370	0.1	0.1	0.1	0.1	0.1	76.9786	77.4294	77.8245	77.4521	77.4164	0.1	77.1709	77.1709	77.0745	77.1929	77.2897	76.8757	0.1	76.9301	0.1	77.1002	77.2377	76.8089	76.7367	77.2396	77.3073	77.2346	77.1481	77.4581	0.1	0.1	0.1	76.974	76.7604	76.8509	77.1886	77.1089	0.1	0.1	0.1	77.0338	77.0338	76.8508	77.126	77.3651	77.0375	0.1	77.3066	0.1
6372	0.1	0.1	0.1	0.1	77.6739	77.151	77.4624	77.5725	77.6347	77.4287	77.0366	77.0982	77.0982	77.0505	77.4847	77.4896	76.9912	76.9155	76.9351	0.1	76.914	77.1277	76.7478	76.8508	77.2004	0.1	77.2322	77.0721	77.5223	77.2602	77.185	77.3369	77.128	0.1	0.1	0.1	77.1605	77.0384	77.1553	0.1	77.1441	77.1441	0.1	77.4892	77.6232	77.3134	77.6268	77.5935	0.1
6383	0.1	0.1	0.1	0.1	0.1	77.0131	77.5786	77.4902	77.792	77.4405	77.1877	77.2115	77.2115	77.1019	77.569	77.1233	77.0372	77.2522	76.7982	77.1415	77.0649	77.2026	76.9436	76.9809	77.1565	0.1	77.447	77.0498	77.365	77.3108	77.0322	77.1166	77.1963	76.9521	76.7665	77.0353	77.1999	77.1039	76.9531	77.3881	77.3828	77.3828	0.1	77.3309	77.1596	77.3322	77.3889	77.373	0.1
6379	0.1	0.1	0.1	0.1	77.5785	77.3561	0.1	0.1	77.7104	77.4848	76.7817	77.1403	77.1657	0.1	77.3663	0.1	77.0871	0.1	77.0384	0.1	77.2292	0.1	76.9843	76.7912	77.1038	77.3461	77.491	77.2	77.8758	0.1	77.0191	0.1	77.0606	0.1	0.1	76.9678	0.1	76.9582	76.9831	0.1	0.1	0.1	0.1	0.1	77.5346	77.3443	77.8051	77.5592	76.9276
6382	0.1	0.1	0.1	0.1	0.1	77.293	0.1	0.1	77.7442	77.585	0.1	77.1711	77.1711	0.1	77.5319	0.1	0.1	0.1	77.172	77.1836	77.1797	0.1	77.0784	76.9693	0.1	0.1	77.6467	77.201	0.1	0.1	0.1	77.1875	77.1535	0.1	0.1	76.999	0.1	0.1	0.1	0.1	0.1	0.1	0.1	0.1	0.1	77.1289	0.1	0.1	0.1
6371	0.1	0.1	0.1	0.1	0.1	0.1	77.3779	0.1	77.642	77.4086	0.1	0.1	0.1	0.1	77.4545	77.4784	76.9735	0.1	77.1259	0.1	77.2079	0.1	76.9879	77.0355	77.1916	0.1	77.4075	76.8821	77.3204	0.1	0.1	77.2474	77.0331	0.1	0.1	77.2584	0.1	77.074	0.1	0.1	0.1	0.1	0.1	0.1	77.7162	77.257	0.1	77.3586	0.1
6378	0.1	0.1	0.1	0.1	0.1	0.1	0.1	0.1	77.5593	77.4668	0.1	0.1	0.1	0.1	77.4789	77.5761	76.9996	0.1	77.0629	0.1	76.839	77.1576	77.0838	77.0945	77.129	0.1	77.0545	77.0775	77.4468	77.3103	0.1	77.1927	0.1	76.8188	76.8706	77.321	0.1	77.2817	77.1777	77.2218	0.1	0.1	0.1	0.1	77.546	77.4529	0.1	77.49	0.1
6375	0.1	0.1	0.1	0.1	0.1	77.2616	0.1	77.425	77.6861	77.522	76.781	0.1	0.1	77.0193	77.5618	77.0972	77.1426	0.1	76.9525	0.1	0.1	0.1	76.8021	0.1	76.9723	0.1	77.214	77.101	0.1	0.1	0.1	77.3596	0.1	76.9864	76.9847	0.1	0.1	77.2963	0.1	0.1	0.1	0.1	0.1	0.1	77.7963	76.994	0.1	77.3297	0.1
6386	0.1	0.1	0.1	0.1	0.1	0.1	0.1	0.1	77.6968	77.5946	76.8053	77.0676	77.1161	77.1585	77.5414	77.5401	77.0435	0.1	77.0798	0.1	77.1311	77.0746	76.9999	0.1	77.1634	0.1	77.3316	77.1791	0.1	0.1	0.1	77.3955	0.1	76.9468	76.9398	0.1	0.1	77.2631	0.1	0.1	0.1	0.1	0.1	0.1	77.9034	76.8853	0.1	77.4981	77.3501
6376	0.1	0.1	0.1	0.1	0.1	0.1	0.1	0.1	0.1	0.1	0.1	77.1832	77.2355	0.1	77.6007	77.3616	0.1	0.1	77.1181	0.1	0.1	77.1262	76.9944	77.2117	77.1327	0.1	77.4303	77.2995	0.1	0.1	0.1	0.1	0.1	77.0248	76.9251	0.1	0.1	77.1991	0.1	0.1	0.1	0.1	0.1	0.1	77.1685	76.8669	0.1	77.4657	0.1
5383	0.1	0.1	0.1	0.1	77.2472	77.4489	77.4542	77.7812	77.5424	77.6019	77.2188	77.3618	77.3618	77.038	77.3385	77.3897	77.161	77.2819	77.0487	77.4665	77.3032	77.3177	77.3468	77.0864	77.2493	77.2747	77.4454	77.2115	77.5459	77.3963	77.2625	77.3513	76.9732	77.2473	77.2721	77.0558	77.1733	77.4136	77.5946	77.5011	77.0988	77.0988	77.3778	77.5803	77.5422	77.0863	77.6719	77.8832	77.2916
5399	77.1923	0.1	77.0591	0.1	77.363	77.357	77.3819	77.6845	77.339	77.5758	77.0798	77.2739	77.2772	76.9538	77.1837	77.1171	77.2863	77.178	76.9891	77.2748	77.1693	77.0764	77.2467	77.0913	77.3026	77.3192	77.1911	77.0977	77.3346	77.2357	77.2326	77.2519	77.0002	77.1118	77.0988	77.1195	77.1502	77.2988	77.4503	77.6594	76.9027	76.9027	77.401	77.5847	77.5269	77.1918	77.4496	77.5326	77.1579
5404	0.1	0.1	77.265	0.1	77.3205	77.6369	77.6927	77.9221	77.5198	77.9284	77.3703	77.6487	77.6487	77.0822	77.3629	77.6122	77.1885	77.0889	77.2106	77.384	77.2795	77.2696	77.1654	77.4811	77.6454	77.3727	77.237	77.2576	77.7116	77.5889	77.2927	77.4725	77.273	77.3476	77.2023	77.0944	77.228	77.6189	77.6575	77.6427	77.2161	77.2161	77.5713	77.7547	77.4206	77.1752	77.5383	77.6025	77.4305
5423	0.1	0.1	0.1	0.1	76.5151	76.344	76.5309	76.576	76.5754	76.3093	76.3809	76.4982	76.4982	76.8305	76.6016	76.5723	76.8522	76.6277	76.6049	76.4663	76.7042	76.9563	76.7297	76.8943	76.6562	76.6974	76.3261	76.6044	76.3617	76.5478	76.4254	76.3499	76.4368	76.639	76.6707	76.5691	76.3286	76.8102	76.8112	76.3977	76.8218	76.8218	76.382	76.3226	76.6509	76.7932	0.1	76.7268	76.6715
3102	0.1	0.1	0.1	0.1	77.1897	76.9059	77.1013	77.2147	76.8388	76.9101	76.636	76.8172	76.8	76.6638	77.162	77.2099	76.9128	76.6853	76.7041	76.6513	76.8141	76.8773	76.7693	76.7533	76.8908	76.6288	76.9291	76.8559	76.994	76.646	76.3859	76.5219	76.637	76.8728	76.9752	76.7382	76.4845	76.9159	76.8848	77.1966	76.9475	76.9688	76.6951	77.0833	77.135	76.8102	76.8228	77.997	76.8833
5382	0.1	0.1	0.1	0.1	77.1667	76.9065	77.1013	77.2147	76.8377	76.896	76.636	76.8196	76.8024	76.6424	77.162	77.1849	76.8916	76.6868	76.6872	76.635	76.7939	76.8559	76.749	76.7533	76.8908	76.6118	76.9291	76.8559	76.994	76.646	76.3859	76.5255	76.637	76.8535	76.9515	76.7209	76.453	76.9159	76.8848	77.1156	76.9475	76.9688	76.6769	77.0243	77.135	76.8102	77.1679	77.6262	76.8833
5426	0.1	0.1	0.1	0.1	76.7549	76.8737	76.8149	76.8302	76.8575	76.6509	76.8636	76.7919	76.7719	76.6964	76.9845	76.9756	76.6092	77.0103	76.8724	76.78	76.791	76.8794	76.8341	76.7054	76.839	76.8388	76.5875	76.82	76.7176	76.7165	76.6485	76.7212	76.7957	77.0286	77.0943	76.8409	76.3103	76.7823	76.7543	76.8345	76.9691	76.9436	76.652	76.7039	76.8624	76.7577	76.8514	76.619	76.907
3107	0.1	0.1	0.1	0.1	0.1	0.1	0.1	0.1	0.1	76.4212	0.1	0.1	0.1	0.1	0.1	0.1	76.7706	0.1	76.6975	76.4482	0.1	76.6983	0.1	77.086	0.1	0.1	0.1	0.1	0.1	76.3856	0.1	0.1	0.1	0.1	0.1	76.425	76.0991	76.9354	0.1	0.1	0.1	0.1	0.1	0.1	0.1	76.8803	0.1	0.1	0.1
5386	0.1	0.1	0.1	0.1	76.6703	0.1	76.3862	76.1492	76.3587	76.477	76.3589	76.4657	76.4502	0.1	76.6277	76.6239	76.5455	76.4337	76.4905	76.4506	76.3534	76.2846	76.4767	76.384	76.5642	76.3498	76.0972	76.3944	76.1966	76.2534	76.1545	76.1425	0.1	76.4835	76.6525	76.4375	76.0765	76.3369	76.2512	76.3465	76.6294	76.6294	76.1562	76.4745	76.413	76.3466	0.1	76.3341	76.4287
5368	0.1	0.1	0.1	0.1	77.1351	76.9693	77.1339	77.2361	76.9833	77.0195	76.7704	76.8568	76.8378	76.6208	77.3115	77.2235	76.9995	76.8699	76.7574	76.7145	76.7775	76.8276	76.7982	76.8146	76.8898	76.8807	77.019	76.9864	77.1093	76.7326	76.6355	76.7024	76.9258	77.1037	77.1606	76.7706	76.5717	77.2009	77.1067	77.2185	77.0819	77.1039	76.7436	77.2043	77.0619	76.8294	77.5059	77.5004	76.8974
5397	0.1	0.1	0.1	0.1	77.1253	76.8559	76.9438	76.9129	77.0066	76.8277	76.803	76.8007	76.8007	76.7955	77.1821	77.3507	76.8738	76.8806	76.5879	76.7371	76.8709	76.836	76.6703	76.6794	76.86	76.7243	76.8051	76.8949	76.9804	76.6241	76.5705	76.6257	76.6489	76.9278	77.0263	76.7995	76.4449	76.9686	76.972	77.0107	77.0165	76.9922	76.7561	77.0817	77.2422	76.7931	77.2591	77.0725	76.683
5431	0.1	0.1	0.1	0.1	76.8417	76.7766	76.6635	76.655	76.5871	76.4671	76.6839	76.7111	76.6927	76.4008	76.865	76.8244	76.7472	76.6185	76.6176	76.623	76.6272	76.6704	76.7514	76.5622	76.7726	76.653	76.4849	76.6791	76.5465	76.6195	76.6473	76.6439	76.4924	76.7131	76.8031	76.6926	76.4307	76.4568	76.4715	76.7215	76.9499	76.9499	76.6404	76.6924	76.6897	76.5939	76.8758	76.7258	76.686
5436	0.1	0.1	0.1	0.1	76.8915	76.6671	76.67	76.6832	76.5521	76.4689	76.6806	76.5977	76.5814	76.3993	76.81	76.7432	76.6198	76.627	76.4987	76.6558	76.6166	76.6301	76.7508	76.5564	76.7006	76.7033	76.4526	76.6882	76.4921	76.5365	76.5005	76.4993	76.1732	76.6949	76.8259	76.6286	76.3234	76.4718	76.4243	76.5657	76.7241	76.7516	76.5783	76.6509	76.5909	76.5382	76.8821	76.5995	76.6382
5437	0.1	0.1	0.1	0.1	76.9068	76.6741	76.7014	76.6941	76.7006	76.62	76.7139	76.5759	76.5609	76.6752	76.8177	76.759	76.7595	76.7268	76.7014	76.5561	76.6775	76.6905	76.7748	76.6304	76.784	76.6451	76.4148	76.7585	76.556	76.6364	76.6226	76.7005	76.3223	76.6929	76.8316	76.5943	76.3596	76.6164	76.6141	76.8017	76.9556	76.9077	76.6133	76.6958	76.7117	76.5718	76.7852	76.6833	76.6394
5384	0.1	0.1	0.1	0.1	76.8786	76.809	76.9959	77.0223	76.6585	76.8266	76.6559	76.7554	76.7554	76.6431	77.0539	76.9745	76.75	76.9659	76.6764	76.6019	76.7111	76.677	76.6781	76.6192	76.7524	76.7001	76.7096	76.9061	76.868	76.5576	76.5232	76.5556	76.4261	76.7468	76.8578	76.9063	76.5271	76.9901	76.8981	77.1373	76.9647	76.9647	76.6939	77.1928	76.98	76.8138	77.1862	77.2299	76.7855
5385	0.1	0.1	0.1	0.1	76.8579	76.6072	76.8078	76.8818	76.7906	76.7348	76.5877	76.7193	76.7193	76.9601	77.1483	77.1293	76.9779	76.9036	76.577	76.4386	76.656	76.8484	76.7616	76.738	76.7343	76.5898	76.6616	76.7615	76.7544	76.6418	76.5079	76.5219	76.318	76.8152	76.9116	76.67	76.3643	77.1779	76.9485	76.9798	77.0677	77.0677	76.5658	77.0959	77.0181	76.9517	77.2224	77.19	76.6137
5432	0.1	0.1	0.1	0.1	76.8275	76.6443	76.6838	76.6566	76.7053	76.5331	76.761	76.716	76.7013	76.6097	76.8699	76.8448	76.8707	76.8074	76.7505	76.5149	76.7604	76.8756	76.743	76.659	76.7348	76.5925	76.4094	76.6941	76.5532	76.8081	76.604	76.5802	76.4506	76.6627	76.7498	76.6554	76.5677	76.7478	76.6262	76.6368	76.959	76.9841	76.6485	76.711	76.8754	76.7792	76.754	76.7919	76.8034
5433	0.1	0.1	0.1	0.1	76.8001	76.7736	76.686	76.6807	76.6815	76.5339	76.673	76.6222	76.6085	76.6884	76.92	76.7839	76.8999	76.8413	76.7287	76.5093	76.7051	76.9428	76.6315	76.9151	76.853	76.591	76.374	76.6731	76.4591	76.8798	76.5928	76.5662	76.7424	76.6641	76.7296	76.7497	76.4473	76.8553	76.7289	76.5953	76.9645	76.9645	76.7096	76.7232	76.8056	76.9365	76.8406	76.6646	76.6749
5329	76.9321	0.1	0.1	0.1	77.0482	76.8709	76.8781	77.0372	76.9615	76.8851	76.7915	76.8296	76.8139	77.0504	77.112	77.187	77.0374	76.8359	76.7713	76.5162	76.7177	77.1156	76.7082	76.8942	76.8733	76.7364	76.9433	76.7603	77.0071	76.7252	76.4918	76.5377	76.6319	76.5663	76.7339	76.8396	76.5286	77.3343	77.1618	77.0849	76.8207	76.8465	76.6826	77.0806	77.0114	77.044	77.2321	77.613	76.63
5430	0.1	0.1	0.1	0.1	76.8036	76.6395	76.6459	76.5735	76.7482	76.5712	76.6412	76.5247	76.5128	76.5062	76.8729	76.7194	76.6774	76.7058	76.6549	76.4096	76.7428	76.7193	76.7722	76.5651	76.7777	76.5894	76.3744	76.654	76.4677	76.7214	76.5326	76.5272	76.4556	76.6266	76.6935	76.5535	76.3501	76.6157	76.5966	76.6915	76.9236	76.9045	76.5864	76.7061	76.7628	76.7952	76.7207	76.5266	76.7005
5381	76.854	0.1	0.1	0.1	76.9736	76.7613	76.8801	77.0245	76.8185	76.8659	76.7201	76.7997	76.7846	77.0014	77.1982	77.2879	77.0124	76.7598	76.7353	76.5227	76.7065	77.0848	76.6861	76.7409	76.7401	76.7009	76.7838	76.801	76.9142	76.6545	76.5331	76.5622	76.6193	76.6923	76.8336	76.7556	76.5064	77.1626	77.0556	77.0197	76.9417	76.9417	76.5635	76.9527	77.0416	77.153	77.1785	77.7934	76.6417
3101	76.8495	0.1	0.1	0.1	76.9287	76.7895	76.9044	77.0483	76.7934	76.8827	76.7201	76.7997	76.7846	77.0014	77.1982	77.2407	76.9932	76.761	76.7201	76.5075	76.7074	77.0635	76.6658	76.7626	76.7161	76.684	76.7591	76.801	76.8928	76.6545	76.5331	76.5622	76.6193	76.6923	76.8071	76.7155	76.5105	77.1328	77.0556	76.9413	76.9649	76.9417	76.544	76.903	77.0416	77.1977	77.2103	77.4315	76.6309
5406	76.1478	0.1	0.1	0.1	76.707	76.6958	76.7044	76.7015	76.7496	76.6113	76.6087	76.6076	76.5939	77.0217	76.8436	76.8894	76.9805	76.6531	76.8145	76.4547	76.5506	76.8447	76.6773	76.824	76.7334	76.6036	76.4231	76.6825	76.4657	76.7081	76.5706	76.5871	76.4823	76.6128	76.7496	76.6383	76.2521	76.899	76.8906	76.4642	76.7974	76.8413	76.5391	76.5509	76.7404	76.8666	76.803	76.5525	76.4965
5435	0.1	0.1	0.1	0.1	76.7975	76.6154	76.6665	76.4288	76.5945	76.4304	76.6454	76.4775	76.465	76.6242	76.8602	76.9077	76.713	76.6015	76.6729	76.4329	76.5597	76.5831	76.7641	76.481	76.5617	76.5712	76.4329	76.6992	76.5308	76.5524	76.5011	76.5117	76.3095	76.5377	76.6684	76.6437	76.3044	76.4656	76.558	76.5602	76.8614	76.9032	76.6029	76.6837	76.7177	76.6212	76.8048	76.5952	76.5949
5428	0.1	0.1	0.1	0.1	76.8121	76.6959	76.7032	76.7528	76.5898	76.4714	76.6768	76.68	76.6863	76.5712	77.0154	76.9326	76.6454	76.8068	76.7825	76.598	76.7066	76.7582	76.8109	76.6259	76.8044	76.6514	76.4788	76.7188	76.6549	76.8055	76.5097	76.5284	76.4461	76.6371	76.7002	76.6882	76.4113	76.4704	76.4722	76.754	76.7995	76.8404	76.5888	76.7406	76.7526	76.6824	76.7564	76.6478	76.8328
5372	0.1	0.1	0.1	0.1	76.9437	76.8765	77.0247	77.1223	76.9828	76.9401	76.7216	76.7619	76.7619	77.0327	77.1472	77.2989	77.0501	76.8503	76.5742	76.4524	76.8043	77.0875	76.7463	76.8457	76.7088	76.7552	76.9129	76.8454	76.9944	76.6804	76.5385	76.5788	76.4151	76.7846	76.8911	76.6953	76.5259	77.1952	77.0803	77.0321	77.0402	77.0402	76.4685	76.972	77.1582	76.951	77.351	77.8828	76.6927
5440	0.1	0.1	0.1	0.1	76.9708	76.7026	76.9222	76.9645	76.8211	76.7457	76.5763	76.7501	76.7355	76.5672	77.197	77.1931	76.6492	76.5964	76.6116	76.4927	76.671	76.7188	76.7516	76.5129	76.6914	76.4942	76.7946	76.7831	76.8922	76.7552	76.4597	76.469	76.4629	76.692	76.8202	76.678	76.3759	76.9362	76.8423	76.8121	76.8287	76.8286	76.5044	76.9295	76.9341	76.8115	77.2686	77.5686	76.6682
5439	0.1	0.1	0.1	0.1	76.8298	76.7846	76.7558	76.751	76.6241	76.6657	76.7305	76.6656	76.65	77.0133	77.147	77.0132	76.8772	76.6859	76.8827	76.498	76.6865	76.7625	76.807	76.7905	76.7945	76.6739	76.4705	76.6754	76.5255	76.8342	76.601	76.6852	76.6966	76.6705	76.8259	76.7363	76.4007	76.7564	76.6271	76.7503	76.8018	76.8018	76.5746	76.7039	76.8666	76.8442	76.8832	76.686	76.7484
5356	0.1	0.1	0.1	0.1	76.6326	76.2114	76.5266	76.3908	76.5806	76.322	76.5162	76.4339	76.4218	76.4724	76.7234	76.7267	76.4369	76.5651	76.5277	76.3384	76.5022	76.4422	76.5812	76.3627	76.4702	76.4856	76.3555	76.4648	76.2993	76.539	76.4035	76.4779	76.3075	76.4556	76.5863	76.4296	76.2495	76.338	76.4825	76.2156	76.7796	76.7796	76.3322	76.395	76.5484	76.2861	76.4256	76.4369	76.5564
5438	0.1	0.1	0.1	0.1	76.8418	0.1	76.6986	76.7201	76.7613	76.4281	76.6838	76.8237	76.8237	76.8434	77.061	76.9049	77.1109	76.6708	76.7724	76.572	76.8336	77.1372	76.7581	76.9879	76.8702	76.6714	76.6382	76.7463	76.6402	76.7424	76.479	76.5482	76.5371	76.7668	76.8742	76.6786	76.4739	76.8487	76.9937	76.706	77.0046	77.0046	76.4949	76.6447	76.6209	76.9173	76.8878	76.708	76.7305
5434	0.1	0.1	0.1	0.1	76.7363	76.7286	76.6843	76.6968	76.6075	76.5516	76.7225	76.7107	76.7107	76.5079	76.9452	76.8682	76.7161	76.7869	76.7355	76.5962	76.7354	76.7141	76.7527	76.6517	76.7775	76.7069	76.5127	76.7853	76.6213	76.696	76.5055	76.5192	76.5298	76.7402	76.8138	76.664	76.3377	76.4888	76.4929	76.7365	76.8825	76.9055	76.659	76.749	76.7448	76.7308	76.799	76.6944	76.8913
5429	0.1	0.1	0.1	0.1	76.7239	76.6857	76.7021	76.7682	76.7042	76.5884	76.7191	76.7065	76.7128	76.7377	77.0399	76.8597	76.8583	76.7439	76.7584	76.6379	76.8021	76.7694	76.7166	76.6794	76.7158	76.5891	76.478	76.7863	76.5523	76.6453	76.5578	76.5847	76.5559	76.7677	76.8783	76.6468	76.4263	76.6212	76.6073	76.6631	76.9868	76.9649	76.6513	76.6548	76.8093	76.7504	76.792	76.6795	76.7723
5427	0.1	0.1	0.1	0.1	76.8231	76.7732	76.6825	76.6922	76.6112	76.6236	76.7681	76.7723	76.7559	76.6214	76.9931	77.05	76.8592	76.7372	76.6909	76.6842	76.7649	76.7725	76.8033	76.6411	76.8015	76.7365	76.5574	76.8449	76.5745	76.7799	76.5476	76.645	76.4321	76.7146	76.8486	76.7482	76.4088	76.5011	76.5312	76.7988	76.9408	76.9181	76.7652	76.7531	76.7704	76.6265	76.7894	76.8441	76.9392
5355	0.1	0.1	0.1	0.1	76.9852	76.8326	76.9735	77.1167	76.9913	76.8019	76.7978	76.7023	76.6899	76.8986	77.2138	77.2039	77.0833	76.8092	76.5176	76.7053	76.8739	77.1242	76.8311	76.8172	76.8515	76.7021	76.7649	76.7259	76.9095	76.7392	76.5892	76.6031	76.8127	76.6705	76.7975	76.7249	76.4426	77.0659	76.9468	76.9059	76.895	76.9201	76.6953	77.0619	77.0492	76.8582	77.4263	77.0422	76.6652
5412	0.1	0.1	0.1	0.1	77.2241	76.819	76.951	76.9726	76.8321	76.7869	76.6956	76.7588	76.7832	76.9814	77.125	76.6709	76.9427	76.7743	77.0247	76.8942	77.0208	76.82	76.6047	76.7073	76.8327	77.0669	76.6706	77.1779	77.3222	76.8939	76.706	76.7281	76.8632	76.9108	76.6994	76.8112	76.825	76.8241	76.893	76.9927	76.8329	76.8329	76.7522	76.7584	76.9291	76.6912	76.8404	76.7696	77.0789
5375	0.1	0.1	0.1	0.1	77.6134	77.163	77.36	77.5447	77.0614	77.2577	76.9852	77.0943	77.0962	76.915	77.4724	77.1742	77.0528	77.0453	77.2352	76.8798	77.1584	77.0119	76.603	76.8714	76.9682	76.9133	77.008	77.3866	77.8036	76.9244	76.8169	76.8254	76.8945	76.9493	76.8522	76.8276	77.0378	77.2032	77.2984	77.3672	77.042	77.0597	76.9598	77.3746	77.2083	76.8552	77.1491	77.7116	77.2212
5418	0.1	0.1	0.1	0.1	77.0482	76.8541	76.7836	76.74	76.5827	76.6849	76.5794	76.7325	76.7148	76.6745	76.9507	76.4905	76.7229	76.5957	76.7901	76.4769	76.8367	76.6694	76.4841	76.4503	76.5914	76.6435	76.3922	76.963	77.0301	76.6048	76.4843	76.4124	76.651	76.5795	76.5601	76.5653	76.6532	76.5104	76.6814	76.7495	76.7481	76.7481	76.6412	76.5769	76.6264	76.5657	76.3351	76.6059	76.7551
5417	0.1	0.1	0.1	0.1	76.9225	76.667	76.7818	76.7087	76.5539	76.6996	76.5748	76.6792	76.6481	76.6476	76.8708	76.5571	76.884	76.6778	76.9435	76.5164	76.8433	76.6914	76.452	76.4175	76.5963	76.6601	76.3581	76.8234	76.9344	76.5195	76.5204	76.466	76.5869	76.549	76.4921	76.5727	76.4617	76.3923	76.5485	76.8319	76.7714	76.7936	76.5857	76.5973	76.6884	76.5923	76.3015	76.4271	76.7215
5420	0.1	0.1	0.1	0.1	77.1184	76.9825	76.9158	76.9521	76.8053	76.9092	76.9461	77.0164	77.0163	76.7627	76.9729	76.8676	77.0552	76.9201	77.2761	76.8323	77.2084	76.9926	76.8392	76.8222	76.898	77.1285	76.7979	77.2303	77.3326	76.8661	76.8355	76.8692	76.9181	76.9681	76.8518	76.822	76.9485	76.7734	76.942	77.1741	77.1549	77.1549	77.0574	77.1585	77.1535	76.8561	76.7802	76.8786	77.1285
5421	0.1	0.1	0.1	0.1	77.2092	77.0224	77.0422	77.032	76.774	76.8391	76.8848	77.0433	77.0064	76.9439	77.0585	76.7556	77.0692	77.0178	77.1758	76.8743	77.2305	76.9844	76.8005	76.9947	77.0385	77.0034	76.8451	77.1491	77.2838	76.9661	76.8078	76.7426	76.9115	76.8623	76.7364	76.8116	77.0225	76.7785	77.0129	77.2291	77.1979	77.1808	77.1439	77.0891	76.9764	76.8413	76.8923	76.9187	77.1824
5371	0.1	0.1	0.1	0.1	77.6159	77.0767	77.2124	77.4137	77.1688	77.1966	76.9237	77.136	77.1162	76.8827	77.5473	77.1097	77.2042	77.0394	77.1549	76.9115	76.9539	76.925	76.8512	76.863	76.9588	77.0706	76.8815	77.3052	77.6593	76.8788	76.793	76.7509	76.9602	77.0597	76.8969	76.8637	76.8871	77.1761	77.408	77.6262	77.1897	77.2092	77.0459	77.4945	77.282	76.8636	77.152	77.5379	77.2884
5419	0.1	0.1	0.1	0.1	76.8716	76.8585	76.6738	76.661	76.5552	76.6932	76.5808	76.6371	76.581	76.5444	76.8245	76.5769	76.9007	76.7066	76.8149	76.4991	76.835	76.6811	76.5227	76.4604	76.626	76.7232	76.4483	77.0929	77.0898	76.5975	76.5311	76.4505	76.681	76.64	76.6154	76.5204	76.6294	76.4123	76.5261	76.8623	76.6758	76.698	76.7239	76.7219	76.7146	76.5857	76.3884	76.6816	76.8146
5410	0.1	0.1	0.1	0.1	76.9604	76.6853	76.8121	76.7076	76.5364	76.6632	76.52	76.7677	76.761	76.4981	76.9334	76.5889	76.7555	76.6588	76.8371	76.5738	77.022	76.8475	76.6139	76.4143	76.649	76.659	76.6051	76.8139	76.9003	76.6437	76.581	76.5247	76.5691	76.8205	76.7247	76.6092	76.6384	76.4685	76.6154	76.7632	76.7369	76.7154	76.6415	76.67	76.7925	76.5171	76.4907	76.7769	76.8197
5414	0.1	0.1	0.1	0.1	77.1498	76.6654	76.8074	76.8677	76.7668	76.7067	76.8277	76.663	76.663	76.698	77.0581	76.622	76.9808	76.7268	77.0325	76.8071	77.1219	77.092	76.7219	76.778	76.9067	76.8601	76.5972	77.1239	77.2555	76.805	76.7228	76.6469	76.8204	76.845	76.7187	76.7608	76.7567	76.7298	76.8212	76.776	76.764	76.764	76.8043	76.8338	76.7263	76.4929	76.8506	76.8632	77.1334
5422	0.1	0.1	0.1	0.1	77.2971	76.812	76.9059	77.0208	76.8234	76.9161	76.9127	76.8904	76.8696	76.7205	77.0582	76.9461	76.9698	76.8665	77.037	76.8467	76.9923	76.9297	76.746	76.777	76.7579	77.0104	76.7505	77.1148	77.36	76.9088	76.738	76.6951	76.906	76.8804	76.7511	76.7217	76.9792	76.7964	76.9399	77.0024	76.9796	76.9603	76.8315	76.8062	77.0433	76.6857	76.7581	76.8692	77.089
5409	0.1	0.1	0.1	0.1	77.0988	76.6319	76.704	76.5283	76.4816	76.7204	76.7184	76.7483	76.774	76.658	76.8968	76.7066	76.8972	76.5791	77.0033	76.6649	77.0981	76.989	76.6093	76.5746	76.7194	76.7617	76.5454	76.8688	77.1458	76.7955	76.5994	76.53	76.6079	76.7846	76.6756	76.6064	76.8039	76.7367	76.8311	76.8343	76.8596	76.8804	76.6873	76.7907	76.8607	76.4857	76.4997	76.7511	76.9086
5400	0.1	0.1	0.1	0.1	77.2741	76.977	77.284	77.228	76.9201	77.127	76.9524	76.9243	76.9458	76.8689	77.2793	76.8705	77.1503	76.9143	77.2261	76.8592	77.2744	77.1251	76.7871	76.7566	76.8792	77.0204	76.7324	77.0389	77.2337	76.9608	76.845	76.8521	76.9051	77.0522	76.863	76.9426	77.022	76.8654	77.0123	77.0419	76.9914	76.9731	76.9595	76.9777	77.2175	76.6902	76.8208	76.9035	77.2303
5407	0.1	0.1	0.1	0.1	77.1258	76.9281	77.2498	77.1813	76.8585	76.9925	76.8082	76.9846	76.9846	76.8064	77.1922	76.9029	77.0707	76.8074	77.2125	76.9602	77.05	76.9767	76.8436	76.8263	76.8733	76.9679	76.7315	77.0753	77.2644	76.9682	76.9084	76.7738	76.9102	76.8711	76.7499	76.7758	76.9906	76.8262	77.0341	77.0618	76.9973	76.9973	76.9315	76.8485	77.0396	76.814	76.8601	76.9842	77.0722
5415	0.1	0.1	0.1	0.1	77.2845	76.9562	76.9741	77.0185	76.8057	77.0098	76.7616	77.0033	77.0033	76.845	77.2017	76.9398	76.9853	76.9109	77.0435	76.8399	77.4068	77.2179	76.8575	76.8422	76.9303	77.0708	76.8488	76.9688	77.2019	76.839	76.9648	76.8997	76.8094	76.8882	76.8705	76.869	76.9236	76.8726	76.9246	77.0364	77.1236	77.1236	76.9478	76.933	77.0046	76.7463	76.8181	77.0095	77.0629
5424	0.1	0.1	0.1	0.1	77.2205	76.8087	76.9137	76.9098	76.6607	76.8396	76.785	76.6472	76.6644	76.7311	77.0793	76.7171	76.9375	76.6146	77.0434	76.7368	77.2229	76.9807	76.7973	76.6065	76.65	76.9076	76.7584	76.9657	77.1292	76.693	76.7244	76.7037	76.735	76.8643	76.6605	76.5486	76.8421	76.7605	76.8391	76.9034	76.8963	76.8963	76.7451	76.806	76.826	76.643	76.5407	76.8275	76.99
5413	0.1	0.1	0.1	0.1	77.1801	76.927	76.8917	76.9762	76.7215	76.8583	76.8349	76.9024	76.8835	76.7019	76.9573	76.7486	76.9809	76.8295	77.2052	76.8465	77.0535	76.9786	76.8075	76.761	76.7697	76.8279	76.6405	77.0083	77.2317	76.8208	76.7686	76.6779	76.7521	76.8687	76.6786	76.6706	76.791	76.7825	76.8667	76.9923	77.0987	77.0987	76.862	76.8797	76.8946	76.6485	76.7825	76.7631	77.1031
5408	0.1	0.1	0.1	0.1	76.8619	76.563	76.7039	76.6704	76.4632	76.6225	76.5335	76.5399	76.5399	76.4777	76.7572	76.4078	76.7034	76.5493	76.7616	76.4068	76.873	76.7266	76.5453	76.4228	76.4643	76.6958	76.2589	76.8068	76.9511	76.4394	76.4742	76.3779	76.4653	76.5757	76.5102	76.4937	76.5036	76.4967	76.6275	76.5472	76.578	76.578	76.4826	76.4718	76.6051	76.2881	76.2268	76.5448	76.7557
5411	0.1	0.1	0.1	0.1	77.0519	76.6716	76.7555	76.6705	76.4991	76.7566	76.7314	76.7231	76.7477	76.7137	76.9344	76.5162	76.7017	76.5825	76.9084	76.5144	76.9112	76.7613	76.6461	76.6609	76.6859	76.7728	76.6301	76.9121	77.0482	76.711	76.5925	76.5389	76.579	76.6641	76.5491	76.5642	76.7689	76.6236	76.7596	76.7747	76.7856	76.7856	76.8286	76.7916	76.7287	76.6352	76.5771	76.6108	76.8499
5416	0.1	0.1	0.1	0.1	77.2506	77.0295	76.9467	76.9786	76.9045	76.9233	76.6526	76.7776	76.7776	76.8374	77.2127	76.6391	76.9813	76.8198	77.0729	76.818	77.1539	77.0636	76.6248	76.8678	77.0749	76.8595	76.7916	77.0655	77.3581	76.8742	76.7686	76.689	76.8702	76.8264	76.7188	76.5916	76.782	76.7099	76.9133	76.9473	76.9678	76.9457	76.9702	76.9066	77.0141	76.699	76.8339	76.7889	77.1993
3104	0.1	0.1	0.1	0.1	77.0926	76.7739	76.6856	76.6593	76.4492	76.7319	76.6474	76.6524	76.6606	76.5919	76.8829	76.5002	76.8241	76.6226	76.9769	76.5195	76.8547	76.6486	76.5617	76.6523	76.6587	76.8336	76.6188	76.9546	77.0836	76.63	76.4332	76.3607	76.5534	76.7123	76.5264	76.5058	76.7367	76.5351	76.573	76.7667	76.8746	76.853	76.6681	76.7263	76.6674	76.5181	76.4265	76.7298	76.9476
5403	0.1	0.1	0.1	0.1	77.2056	77.207	77.169	77.3612	77.3275	77.202	76.6695	77.1559	77.159	77.1625	77.2999	77.1456	76.8266	77.1084	76.9633	76.8632	77.2436	77.2325	76.9904	76.9914	77.1158	77.3074	77.2554	77.1668	77.6319	77.0772	77.0148	77.1681	76.9697	76.8428	76.886	76.9621	77.3665	77.2959	77.2298	77.3488	77.1493	77.1502	77.2039	77.3738	77.2579	76.8123	77.336	77.6772	77.0827
5341	0.1	0.1	0.1	0.1	77.0648	77.2898	77.2929	77.3177	77.0213	77.373	76.8709	77.2223	77.2213	77.0184	77.3154	77.0944	77.0515	76.8634	77.2505	76.7598	77.1476	77.2876	77.175	76.9956	77.1209	76.9507	77.2114	77.1068	77.1546	77.0736	77.0193	77.1159	77.1896	76.7154	76.6468	76.9048	77.2989	77.1855	77.2538	77.3353	76.824	76.8241	77.0925	77.1832	76.8779	77.1621	77.1834	77.1328	77.1554
5377	0.1	0.1	0.1	0.1	77.0667	77.2193	76.9933	77.1569	77.2028	77.1731	76.719	77.3089	77.3089	77.1861	77.1776	76.9846	76.9071	76.8055	77.0885	77.1047	77.461	77.6172	77.016	76.9325	77.1811	76.9743	77.2719	77.186	77.3255	77.1257	77.0878	77.1147	77.0791	76.8279	76.8562	77.0374	77.2412	76.9789	77.0911	77.1054	76.742	76.742	77.0461	76.8413	77.1019	77.2324	77.3454	77.0762	77.3332
5402	0.1	0.1	0.1	0.1	77.2727	77.2385	77.208	77.6341	77.4681	77.4226	76.7523	77.5047	77.5073	77.0994	77.4897	77.2977	76.8774	76.9119	77.1316	77.2281	77.4672	77.5411	76.9744	76.9752	77.1924	76.9892	77.4359	77.2308	77.6177	77.0161	77.1794	77.1663	77.2295	76.9541	76.9485	77.2684	77.5032	77.3989	77.3843	77.3239	77.0389	77.0385	76.9235	77.161	77.3337	77.1899	77.7648	77.7908	77.276
5338	0.1	0.1	0.1	0.1	77.1529	77.041	76.8738	77.2366	77.1738	77.5944	76.5948	77.037	77.037	76.798	77.3485	77.0106	76.8097	76.8527	76.8997	76.7263	76.9633	77.1707	77.1217	77.0654	77.2063	76.8524	77.0807	77.1233	77.4084	76.9862	76.9499	77.0117	77.0271	76.8557	76.7563	76.9605	77.1654	77.0502	77.0672	77.0558	76.8509	76.8509	76.8423	77.1599	77.0227	76.9604	77.6673	77.3807	77.0453
5345	0.1	0.1	0.1	0.1	77.0513	77.1674	76.8886	76.9754	77.2402	77.4221	76.5684	77.3515	77.3543	77.1437	77.2177	76.9805	76.9239	77.0538	77.0658	76.9551	77.1208	77.1665	77.2417	76.9282	77.1346	76.9618	77.1472	77.1714	77.3686	77.2088	76.9344	77.0232	76.994	76.7703	76.6835	77.0321	77.1095	77.0234	76.99	76.977	76.8837	76.8676	76.8664	76.9073	77.0031	77.0806	77.251	77.29	77.2454
5335	0.1	0.1	76.8531	0.1	77.0861	77.1289	77.1585	77.2579	77.1117	77.6382	76.5612	77.3565	77.3565	77.1492	77.4164	77.1414	76.996	76.8877	76.9045	77.0369	77.2248	77.2564	77.2202	77.0269	77.205	76.9483	77.2927	77.3925	77.6338	77.1151	76.9627	77.0544	77.0553	76.7227	76.7024	77.1096	77.173	77.1017	77.192	77.2651	76.8849	76.8632	77.0349	77.1477	77.1917	77.0376	77.3804	77.3246	77.2223
5333	0.1	0.1	0.1	0.1	77.1814	77.298	77.086	77.2261	77.4525	77.795	76.9767	77.6711	77.6666	76.9877	77.3503	77.2658	77.0434	77.0557	77.193	77.0235	77.3992	77.3548	77.255	77.2366	77.399	76.9875	77.4631	77.1602	77.5468	77.1177	76.8569	76.9641	77.0488	77.0521	77.0186	77.2239	77.3128	77.2803	77.2963	77.3147	76.8439	76.8441	77.02	77.2128	77.1429	77.2333	77.5961	77.3432	77.5211
5339	76.9913	0.1	0.1	0.1	77.1653	77.2312	76.9943	77.1809	77.3281	77.4758	76.6644	77.0851	77.1128	76.8717	77.0538	77.0362	76.875	77.0067	76.9921	76.9558	77.0331	77.142	77.0974	77.0178	77.154	76.8888	77.2436	77.0872	77.3815	77.2122	76.9603	77.0317	76.846	76.7955	76.7901	77.1116	77.1285	77.1758	77.1194	77.1052	76.9274	76.9274	76.9671	77.0023	77.1836	76.8976	77.6726	77.2201	77.2906
5344	0.1	0.1	0.1	0.1	77.2878	77.3166	77.2603	77.373	77.5222	77.7797	76.6791	77.6266	77.6266	77.166	77.6025	77.0876	76.9196	77.187	77.3031	77.1202	77.2159	77.3603	77.4735	77.1708	77.2732	77.0209	77.5918	77.2802	77.575	77.1214	77.1217	77.2056	77.1847	77.1311	77.1165	77.2636	77.3061	77.4639	77.3736	77.5082	77.0699	77.0935	77.0599	77.1537	77.1694	76.9504	77.6386	77.3732	77.4059
5342	0.1	0.1	0.1	0.1	77.3971	77.2871	77.0441	77.03	77.4484	77.5605	76.7215	77.5597	77.5797	77.214	77.4897	77.0879	76.977	76.9669	77.2138	77.0194	77.1381	77.287	77.3598	77.2023	77.328	76.9719	77.3959	77.2151	77.3756	77.0046	77.0451	77.1822	77.0744	76.8303	76.8278	77.291	77.1636	77.2178	77.1772	77.2049	76.9126	76.9303	76.9278	76.9648	77.1345	76.9017	77.6841	77.2321	77.224
5334	0.1	0.1	0.1	0.1	77.2599	77.3094	77.179	77.3235	77.3687	77.7292	76.7992	77.5797	77.5589	77.0327	77.57	77.1611	77.0948	77.0952	77.2513	77.0249	77.0895	77.2717	77.4163	77.1085	77.3094	76.9569	77.7044	77.0936	77.3774	77.2551	77.1463	77.234	77.1027	77.0754	77.0636	77.3315	77.2286	77.3393	77.2366	77.4837	77.091	77.091	77.0701	77.2125	77.3405	77.0075	77.6817	77.8161	77.2845
5336	0.1	0.1	0.1	0.1	77.4955	77.3948	77.2462	77.4149	77.5173	77.8215	76.9106	77.4867	77.4867	77.2942	77.4862	77.1394	77.1411	77.0967	77.3193	77.0943	77.1916	77.4317	77.311	77.3248	77.3644	77.112	77.8636	77.4007	77.912	76.9938	77.0839	77.1954	77.2732	77.0297	77.0976	77.2832	77.1415	77.5767	77.4102	77.4583	76.9876	76.9876	77.1406	77.3328	77.1251	77.3316	77.8352	77.6254	77.4502
5337	0.1	0.1	0.1	0.1	77.2381	77.39	77.3746	77.4667	77.5265	77.6856	76.869	77.6519	77.6519	77.059	77.6089	77.1581	76.9675	77.3068	77.3619	77.0534	77.3123	77.4123	77.4845	77.1369	77.3376	77.2032	77.6202	77.2229	77.5207	77.1188	77.0732	77.2958	77.2063	77.0292	77.0535	77.1754	77.2622	77.4639	77.4227	77.4622	77.0682	77.0682	77.0239	77.1797	77.3263	77.2638	77.8571	77.6793	77.49
5343	0.1	0.1	0.1	0.1	77.0056	77.2169	77.2574	77.3472	77.3826	77.5781	76.9871	77.9999	77.9999	76.9858	77.4723	77.1452	76.8727	76.9849	77.2287	76.9625	77.0649	77.1825	77.217	77.1467	77.2653	77.0832	77.3642	77.0532	77.305	77.042	76.8526	77.0355	77.0934	76.9773	76.9001	77.1343	77.1239	77.2329	77.2635	77.3276	76.8533	76.8304	76.756	76.9642	77.2485	77.147	77.6996	77.3256	77.3911
5340	0.1	0.1	0.1	0.1	77.307	77.4845	77.1971	77.3426	77.4327	77.5726	76.7896	77.6108	77.6108	77.2838	77.589	77.2795	77.0336	77.1421	77.2254	77.1891	77.1615	77.3118	77.2269	77.2341	77.3615	77.1366	77.4433	77.2483	77.4781	77.061	77.1129	77.2524	77.2796	76.9902	76.8877	77.195	77.447	77.3685	77.3617	77.3264	76.9106	76.9106	77.0503	77.0964	77.1579	77.1836	77.8521	77.4054	77.4996
5331	0.1	0.1	0.1	0.1	76.6065	76.5234	76.7231	76.7799	76.7383	76.6371	76.6623	76.4843	76.4943	76.5067	76.6119	76.6764	76.7589	76.5607	76.4197	76.5319	76.5838	76.5967	76.5172	76.5101	76.4768	76.6094	76.9616	76.6218	76.8532	76.7809	76.7271	76.6519	76.5755	76.8322	76.6476	76.4666	76.6078	76.6267	76.7304	76.7161	76.441	76.441	76.4231	76.4721	76.8023	76.6226	76.8264	76.6458	76.4836
5330	0.1	0.1	76.4254	0.1	76.5623	76.6372	76.8096	76.8692	76.6855	76.6972	76.684	76.4916	76.5042	76.5297	76.6385	76.756	76.7523	76.45	76.6183	76.3284	76.7249	76.7561	76.4245	76.5421	76.5285	76.507	76.9588	76.573	76.8893	76.745	76.773	76.7751	76.5964	76.7505	76.6873	76.6827	76.5676	76.7612	76.9712	76.8774	76.3852	76.3852	76.367	76.6048	76.989	76.8219	77.2174	76.8094	76.6055
5332	0.1	0.1	0.1	0.1	76.6668	76.5281	76.7586	76.8643	76.5453	76.5959	76.4856	76.4061	76.4162	76.3852	76.5885	76.7204	76.754	76.4324	76.3206	76.3234	76.6861	76.6398	76.3881	76.6134	76.5733	76.3047	76.8455	76.3803	76.7461	76.5896	76.5619	76.7171	76.4364	76.7206	76.6883	76.5274	76.6097	76.5686	76.673	76.7897	76.4927	76.4927	76.2732	76.5026	76.7395	76.6098	76.8772	76.7182	76.4666
5373	0.1	0.1	0.1	0.1	76.329	76.2878	76.4983	76.5403	76.3882	76.2435	76.5816	76.2922	76.2922	76.3312	76.4602	76.3215	76.3984	76.1568	76.4362	76.4731	76.1447	76.1657	76.323	76.4893	76.3944	76.4858	76.3634	76.3884	76.5538	76.3388	76.443	76.4606	76.4456	76.206	76.338	76.3174	76.0334	76.4101	76.2429	76.2043	76.6729	76.6555	76.3725	76.2301	76.2447	76.3753	76.6295	76.2601	76.5659
5365	0.1	0.1	0.1	0.1	76.4213	76.4513	76.5891	76.537	76.2901	76.868	76.3784	76.3931	76.3931	76.2264	76.7519	76.6048	76.1525	76.2985	76.4297	76.3358	76.259	76.2732	76.2261	76.2566	76.3949	76.3247	76.3656	76.3281	76.5449	76.2525	76.4787	76.4273	76.2159	76.3519	0.1	76.3977	76.2795	76.6451	76.3669	76.5877	76.4319	76.4319	76.2328	76.4062	76.7402	76.2747	76.7467	77.0716	76.3
5352	0.1	0.1	0.1	0.1	76.5989	76.3882	76.834	76.7097	76.7015	76.7544	76.6448	76.5246	76.5246	76.2694	76.7463	76.494	76.4475	76.3668	76.5661	76.3209	76.418	76.3595	76.5516	76.6346	76.6707	76.462	76.6722	76.5923	76.9842	76.6133	76.532	76.6278	76.6346	76.5393	76.5651	76.4877	76.5902	76.5209	76.5345	0.1	0.1	0.1	76.4861	76.7094	76.9353	76.4036	76.8604	76.3741	76.2977
5405	0.1	0.1	0.1	0.1	76.3233	76.3198	76.4075	76.4453	76.4438	76.4303	76.4007	76.3435	76.3435	0.1	76.4919	76.4486	0.1	76.094	76.5106	76.0228	0.1	0.1	76.2244	76.1312	76.1523	76.1224	76.2889	0.1	0.1	76.3396	0.1	0.1	0.1	0.1	0.1	76.1296	76.0482	76.4746	76.2359	0.1	0.1	0.1	0.1	0.1	0.1	76.0435	76.7266	77.0953	0.1
5374	0.1	0.1	0.1	0.1	76.1126	76.4345	76.5712	0.1	76.3386	76.5345	76.3146	76.4112	76.4112	0.1	76.5858	76.53	76.3984	76.2684	76.4068	76.2395	76.1392	76.1613	76.5318	76.4369	76.5437	76.4389	76.0834	0.1	0.1	76.22	0.1	76.2199	0.1	76.2067	76.2998	76.1768	76.07	76.2786	0.1	0.1	76.5372	76.5341	76.3215	76.4203	0.1	0.1	0.1	76.7041	76.2944
5346	79.9856	79.9488	79.7159	79.9059	76.7767	76.6069	76.5902	76.641	76.4884	76.398	76.4529	76.2138	76.2138	76.8046	76.8772	76.3493	75.9909	76.1384	76.3205	76.6079	76.6843	76.7025	76.617	76.3016	76.3974	76.2815	76.1404	76.004	76.1822	76.5665	76.5891	76.5362	76.5874	76.7081	76.9113	76.4666	76.4995	76.4766	76.2174	76.7835	76.8556	76.8556	76.7097	76.7948	76.21	76.0428	76.5238	76.3136	76.5546
5425	80.2143	80.0081	79.6178	79.8828	77.1171	76.8348	76.7278	76.9386	76.7109	76.6165	76.4333	76.4467	76.4317	77.0523	77.1173	76.8166	76.0681	76.3376	76.471	76.6391	76.7347	76.8071	76.5638	76.4003	76.4627	76.3294	76.3784	76.0431	76.5203	76.7109	76.5988	76.6091	76.6751	76.6801	76.8915	76.6755	76.6869	76.9114	76.5936	77.1452	76.8082	76.8082	76.7523	77.049	76.3855	76.2199	77.2261	77.1754	76.5631
5366	0.1	0.1	0.1	0.1	0.1	0.1	0.1	0.1	0.1	0.1	0.1	0.1	0.1	0.1	0.1	0.1	0.1	0.1	0.1	0.1	0.1	0.1	0.1	0.1	0.1	0.1	0.1	0.1	0.1	0.1	0.1	0.1	0.1	0.1	0.1	0.1	0.1	76.3974	0.1	0.1	0.1	0.1	0.1	0.1	0.1	0.1	0.1	0.1	0.1
5380	0.1	0.1	0.1	0.1	76.7102	0.1	76.4771	76.5176	76.3392	76.5789	76.5952	76.3357	76.3357	76.3261	76.9545	76.5819	0.1	76.1734	76.3232	76.1224	76.2268	76.2629	76.3824	76.2237	76.4525	76.4597	76.5301	76.2455	76.6182	76.1898	76.4884	76.5641	76.2495	76.3471	76.2816	76.3466	76.3214	76.5557	76.6226	76.3864	76.3043	76.2686	76.3779	76.57	0.1	76.1223	76.4205	76.7609	76.4748
6741	0.1	0.1	0.1	0.1	0.1	0.1	0.1	0.1	0.1	0.1	0.1	0.1	0.1	0.1	0.1	0.1	0.1	0.1	76.1213	0.1	0.1	0.1	0.1	0.1	0.1	0.1	0.1	0.1	0.1	0.1	0.1	0.1	0.1	0.1	75.6865	0.1	0.1	0.1	0.1	0.1	0.1	0.1	0.1	0.1	0.1	0.1	0.1	0.1	0.1
5387	0.1	0.1	0.1	0.1	0.1	0.1	0.1	0.1	0.1	0.1	0.1	0.1	0.1	0.1	0.1	0.1	0.1	0.1	0.1	0.1	0.1	0.1	0.1	0.1	0.1	0.1	0.1	0.1	0.1	0.1	0.1	0.1	0.1	0.1	0.1	0.1	0.1	0.1	0.1	0.1	0.1	0.1	0.1	0.1	0.1	0.1	0.1	0.1	0.1
4561	0.1	0.1	0.1	0.1	0.1	0.1	0.1	0.1	0.1	0.1	0.1	0.1	0.1	0.1	0.1	0.1	0.1	0.1	0.1	0.1	0.1	0.1	0.1	0.1	0.1	0.1	0.1	0.1	0.1	0.1	0.1	0.1	0.1	0.1	0.1	0.1	0.1	0.1	0.1	0.1	0.1	0.1	0.1	0.1	0.1	0.1	0.1	0.1	0.1
5396	0.1	0.1	0.1	0.1	0.1	0.1	0.1	0.1	0.1	0.1	0.1	0.1	0.1	0.1	0.1	0.1	0.1	0.1	0.1	0.1	0.1	0.1	76.473	0.1	76.6051	0.1	0.1	0.1	0.1	0.1	0.1	0.1	0.1	0.1	0.1	0.1	0.1	0.1	0.1	0.1	0.1	0.1	0.1	0.1	0.1	0.1	0.1	0.1	0.1
5393	0.1	0.1	0.1	0.1	0.1	0.1	0.1	0.1	0.1	0.1	0.1	0.1	0.1	0.1	76.7912	0.1	0.1	0.1	0.1	0.1	0.1	0.1	0.1	0.1	0.1	0.1	0.1	0.1	0.1	0.1	0.1	0.1	0.1	0.1	0.1	0.1	0.1	0.1	0.1	0.1	0.1	0.1	0.1	0.1	0.1	0.1	0.1	0.1	0.1
6402	0.1	0.1	0.1	0.1	0.1	0.1	0.1	0.1	0.1	0.1	0.1	0.1	0.1	0.1	0.1	0.1	0.1	0.1	0.1	0.1	0.1	0.1	0.1	0.1	0.1	0.1	0.1	0.1	0.1	0.1	0.1	0.1	0.1	0.1	0.1	0.1	0.1	0.1	0.1	0.1	0.1	0.1	0.1	0.1	0.1	0.1	0.1	0.1	0.1
4563	0.1	0.1	0.1	0.1	0.1	0.1	0.1	0.1	0.1	0.1	0.1	0.1	0.1	0.1	0.1	0.1	0.1	0.1	0.1	0.1	0.1	0.1	0.1	0.1	0.1	0.1	0.1	0.1	0.1	0.1	0.1	0.1	0.1	0.1	0.1	0.1	0.1	0.1	0.1	0.1	0.1	0.1	0.1	0.1	0.1	0.1	0.1	0.1	0.1
5394	0.1	0.1	0.1	0.1	0.1	0.1	0.1	0.1	0.1	0.1	0.1	0.1	0.1	0.1	0.1	0.1	0.1	0.1	0.1	0.1	0.1	0.1	0.1	0.1	0.1	0.1	0.1	0.1	0.1	0.1	0.1	0.1	0.1	0.1	0.1	0.1	0.1	0.1	0.1	0.1	0.1	0.1	0.1	0.1	0.1	0.1	0.1	0.1	0.1
5395	0.1	0.1	0.1	0.1	0.1	0.1	0.1	0.1	0.1	0.1	0.1	0.1	0.1	0.1	0.1	0.1	0.1	0.1	0.1	0.1	0.1	0.1	0.1	0.1	0.1	0.1	0.1	0.1	0.1	0.1	0.1	0.1	0.1	0.1	0.1	0.1	0.1	0.1	0.1	0.1	0.1	0.1	0.1	0.1	0.1	0.1	0.1	0.1	0.1
6392	0.1	0.1	0.1	0.1	0.1	0.1	0.1	0.1	0.1	0.1	0.1	0.1	0.1	0.1	0.1	0.1	0.1	0.1	0.1	0.1	0.1	0.1	0.1	0.1	0.1	0.1	0.1	0.1	0.1	0.1	0.1	0.1	0.1	0.1	0.1	0.1	0.1	0.1	0.1	0.1	0.1	0.1	0.1	0.1	0.1	0.1	0.1	0.1	0.1
5390	0.1	0.1	0.1	0.1	0.1	0.1	0.1	0.1	0.1	0.1	0.1	0.1	0.1	0.1	0.1	0.1	0.1	0.1	0.1	0.1	0.1	0.1	0.1	0.1	0.1	0.1	0.1	0.1	0.1	0.1	0.1	76.6795	0.1	0.1	0.1	0.1	0.1	0.1	0.1	0.1	0.1	0.1	0.1	0.1	0.1	0.1	0.1	0.1	0.1
5392	0.1	0.1	0.1	0.1	0.1	0.1	0.1	0.1	0.1	0.1	0.1	0.1	0.1	0.1	0.1	0.1	0.1	0.1	0.1	0.1	0.1	0.1	0.1	0.1	0.1	0.1	0.1	0.1	0.1	0.1	0.1	0.1	0.1	0.1	0.1	0.1	0.1	0.1	0.1	0.1	0.1	0.1	0.1	0.1	0.1	0.1	0.1	0.1	0.1
5391	0.1	0.1	0.1	0.1	0.1	0.1	0.1	0.1	0.1	0.1	0.1	0.1	0.1	0.1	0.1	0.1	0.1	0.1	0.1	0.1	0.1	0.1	0.1	0.1	0.1	0.1	0.1	0.1	0.1	0.1	0.1	0.1	0.1	0.1	0.1	0.1	0.1	0.1	0.1	0.1	0.1	0.1	0.1	0.1	0.1	0.1	0.1	0.1	0.1
5401	0.1	0.1	0.1	0.1	0.1	0.1	0.1	0.1	0.1	0.1	0.1	0.1	0.1	0.1	0.1	0.1	0.1	0.1	0.1	0.1	0.1	0.1	0.1	0.1	0.1	0.1	0.1	0.1	0.1	0.1	0.1	0.1	0.1	0.1	0.1	0.1	0.1	0.1	0.1	0.1	0.1	0.1	0.1	0.1	0.1	0.1	0.1	0.1	0.1
5389	0.1	0.1	0.1	0.1	0.1	0.1	0.1	0.1	0.1	0.1	0.1	0.1	0.1	0.1	0.1	0.1	0.1	0.1	0.1	0.1	0.1	0.1	0.1	0.1	0.1	0.1	0.1	0.1	0.1	0.1	0.1	0.1	0.1	0.1	0.1	0.1	0.1	0.1	0.1	0.1	0.1	0.1	0.1	0.1	0.1	0.1	0.1	77.7755	0.1
4562	0.1	0.1	0.1	0.1	0.1	0.1	0.1	0.1	0.1	0.1	0.1	0.1	0.1	0.1	0.1	0.1	0.1	0.1	0.1	0.1	0.1	0.1	0.1	0.1	0.1	0.1	0.1	0.1	0.1	0.1	0.1	0.1	0.1	0.1	0.1	0.1	0.1	0.1	0.1	0.1	0.1	0.1	0.1	0.1	0.1	0.1	0.1	0.1	0.1
4565	0.1	0.1	0.1	0.1	0.1	0.1	0.1	0.1	0.1	0.1	0.1	0.1	0.1	0.1	0.1	0.1	0.1	0.1	0.1	0.1	0.1	0.1	0.1	0.1	0.1	0.1	0.1	0.1	0.1	0.1	0.1	0.1	0.1	0.1	0.1	0.1	0.1	0.1	0.1	0.1	0.1	0.1	0.1	0.1	0.1	0.1	0.1	0.1	0.1
5367	0.1	0.1	0.1	0.1	0.1	0.1	0.1	0.1	0.1	0.1	0.1	0.1	0.1	0.1	76.9067	0.1	0.1	0.1	0.1	0.1	0.1	0.1	0.1	0.1	0.1	0.1	0.1	0.1	0.1	0.1	0.1	0.1	0.1	0.1	0.1	0.1	0.1	0.1	0.1	0.1	0.1	0.1	0.1	0.1	0.1	0.1	0.1	0.1	0.1
6390	0.1	0.1	0.1	0.1	0.1	0.1	0.1	0.1	0.1	0.1	0.1	0.1	0.1	0.1	76.7823	0.1	0.1	0.1	0.1	0.1	0.1	0.1	0.1	0.1	0.1	0.1	0.1	0.1	0.1	0.1	0.1	0.1	0.1	0.1	0.1	0.1	0.1	0.1	0.1	0.1	0.1	0.1	0.1	0.1	0.1	0.1	0.1	0.1	0.1
6388	0.1	0.1	0.1	0.1	0.1	0.1	0.1	0.1	0.1	0.1	0.1	0.1	0.1	0.1	76.5155	0.1	0.1	0.1	0.1	0.1	0.1	0.1	0.1	0.1	0.1	0.1	0.1	0.1	0.1	0.1	0.1	0.1	0.1	0.1	0.1	0.1	0.1	0.1	0.1	0.1	0.1	0.1	0.1	0.1	0.1	0.1	0.1	0.1	0.1
6389	0.1	0.1	0.1	0.1	0.1	0.1	0.1	0.1	0.1	0.1	0.1	0.1	0.1	0.1	76.5196	0.1	0.1	0.1	0.1	0.1	0.1	0.1	0.1	0.1	0.1	0.1	0.1	0.1	0.1	0.1	0.1	0.1	0.1	0.1	0.1	0.1	0.1	0.1	0.1	0.1	0.1	0.1	0.1	0.1	0.1	0.1	0.1	0.1	0.1
6391	0.1	0.1	0.1	0.1	0.1	0.1	0.1	0.1	0.1	0.1	0.1	0.1	0.1	0.1	0.1	0.1	0.1	0.1	0.1	0.1	0.1	0.1	0.1	0.1	0.1	0.1	0.1	0.1	0.1	0.1	0.1	0.1	0.1	0.1	0.1	0.1	0.1	0.1	0.1	0.1	0.1	0.1	0.1	0.1	0.1	0.1	0.1	0.1	0.1
5388	0.1	0.1	0.1	0.1	0.1	0.1	0.1	0.1	0.1	0.1	0.1	0.1	0.1	0.1	0.1	0.1	0.1	0.1	0.1	0.1	0.1	0.1	0.1	0.1	0.1	0.1	0.1	0.1	0.1	0.1	0.1	0.1	0.1	0.1	0.1	0.1	0.1	0.1	0.1	0.1	0.1	0.1	0.1	0.1	0.1	0.1	0.1	0.1	0.1
6361	0.1	0.1	0.1	0.1	0.1	0.1	0.1	0.1	0.1	0.1	0.1	0.1	0.1	0.1	0.1	0.1	0.1	0.1	0.1	0.1	0.1	0.1	0.1	0.1	0.1	0.1	0.1	0.1	0.1	0.1	0.1	0.1	0.1	0.1	0.1	0.1	0.1	0.1	0.1	0.1	0.1	0.1	0.1	0.1	0.1	0.1	0.1	0.1	0.1
5378	0.1	0.1	0.1	0.1	0.1	0.1	0.1	0.1	0.1	0.1	0.1	0.1	0.1	0.1	0.1	0.1	0.1	0.1	0.1	0.1	0.1	0.1	0.1	0.1	0.1	0.1	0.1	0.1	0.1	0.1	0.1	0.1	0.1	0.1	0.1	0.1	0.1	0.1	0.1	0.1	0.1	0.1	0.1	0.1	0.1	0.1	0.1	0.1	0.1
5349	0.1	0.1	0.1	0.1	0.1	0.1	0.1	0.1	0.1	0.1	0.1	0.1	0.1	0.1	0.1	0.1	0.1	0.1	0.1	0.1	0.1	0.1	0.1	0.1	0.1	0.1	0.1	0.1	0.1	0.1	0.1	0.1	0.1	0.1	0.1	0.1	0.1	0.1	0.1	0.1	0.1	0.1	0.1	0.1	0.1	0.1	0.1	0.1	0.1
5351	0.1	0.1	0.1	0.1	0.1	0.1	0.1	0.1	0.1	0.1	0.1	0.1	0.1	0.1	0.1	0.1	0.1	0.1	0.1	0.1	0.1	0.1	0.1	0.1	0.1	0.1	0.1	0.1	0.1	0.1	0.1	0.1	0.1	0.1	0.1	0.1	0.1	0.1	0.1	0.1	0.1	0.1	0.1	0.1	0.1	0.1	0.1	0.1	0.1
6360	0.1	0.1	0.1	0.1	0.1	0.1	0.1	0.1	0.1	0.1	0.1	0.1	0.1	0.1	0.1	0.1	0.1	0.1	0.1	0.1	0.1	0.1	0.1	0.1	0.1	0.1	0.1	0.1	0.1	0.1	0.1	0.1	0.1	0.1	0.1	0.1	0.1	0.1	0.1	0.1	0.1	0.1	0.1	0.1	0.1	0.1	0.1	0.1	0.1
5379	0.1	0.1	0.1	0.1	0.1	0.1	0.1	0.1	0.1	0.1	0.1	0.1	0.1	0.1	0.1	0.1	0.1	0.1	0.1	0.1	0.1	0.1	0.1	0.1	0.1	0.1	0.1	0.1	0.1	0.1	0.1	0.1	0.1	0.1	0.1	0.1	0.1	0.1	0.1	0.1	0.1	0.1	0.1	0.1	0.1	0.1	0.1	0.1	0.1
6740	0.1	0.1	0.1	0.1	0.1	0.1	0.1	0.1	0.1	0.1	0.1	0.1	0.1	0.1	0.1	0.1	0.1	0.1	0.1	0.1	0.1	0.1	0.1	0.1	0.1	0.1	0.1	0.1	0.1	0.1	0.1	0.1	0.1	0.1	0.1	0.1	0.1	0.1	0.1	0.1	0.1	0.1	0.1	0.1	0.1	0.1	0.1	0.1	0.1
6734	0.1	0.1	0.1	0.1	0.1	0.1	0.1	0.1	0.1	0.1	0.1	0.1	0.1	0.1	0.1	0.1	0.1	0.1	0.1	0.1	0.1	0.1	0.1	0.1	0.1	0.1	0.1	0.1	0.1	0.1	0.1	0.1	0.1	0.1	0.1	0.1	0.1	0.1	0.1	0.1	0.1	0.1	0.1	0.1	0.1	0.1	0.1	0.1	0.1
6731	0.1	0.1	0.1	0.1	0.1	0.1	0.1	0.1	0.1	0.1	0.1	0.1	0.1	0.1	0.1	0.1	0.1	0.1	0.1	0.1	0.1	0.1	0.1	0.1	0.1	0.1	0.1	0.1	0.1	0.1	0.1	0.1	0.1	0.1	0.1	0.1	0.1	0.1	0.1	0.1	0.1	0.1	0.1	0.1	0.1	0.1	0.1	0.1	0.1
6733	0.1	0.1	0.1	0.1	0.1	0.1	0.1	0.1	0.1	0.1	0.1	0.1	0.1	0.1	0.1	0.1	0.1	0.1	0.1	0.1	0.1	0.1	0.1	0.1	0.1	0.1	0.1	0.1	0.1	0.1	0.1	0.1	0.1	0.1	0.1	0.1	0.1	0.1	0.1	0.1	0.1	0.1	0.1	0.1	0.1	0.1	0.1	0.1	0.1
6732	0.1	0.1	0.1	0.1	0.1	0.1	0.1	0.1	0.1	0.1	0.1	0.1	0.1	0.1	0.1	0.1	0.1	0.1	0.1	0.1	0.1	0.1	0.1	0.1	0.1	0.1	0.1	0.1	0.1	0.1	0.1	0.1	0.1	0.1	0.1	0.1	0.1	0.1	0.1	0.1	0.1	0.1	0.1	0.1	0.1	0.1	0.1	0.1	0.1
5441	0.1	0.1	0.1	0.1	0.1	0.1	0.1	0.1	0.1	0.1	0.1	0.1	0.1	0.1	0.1	0.1	0.1	0.1	0.1	0.1	0.1	0.1	0.1	0.1	0.1	0.1	0.1	0.1	0.1	0.1	0.1	0.1	0.1	0.1	0.1	0.1	0.1	0.1	0.1	0.1	0.1	0.1	0.1	0.1	0.1	0.1	0.1	0.1	0.1
6736	0.1	0.1	0.1	0.1	0.1	0.1	0.1	0.1	0.1	0.1	0.1	0.1	0.1	0.1	0.1	0.1	0.1	0.1	0.1	0.1	0.1	0.1	0.1	0.1	0.1	0.1	0.1	0.1	0.1	0.1	0.1	0.1	0.1	0.1	0.1	0.1	0.1	0.1	0.1	0.1	0.1	0.1	0.1	0.1	0.1	0.1	0.1	0.1	0.1
6735	0.1	0.1	0.1	0.1	0.1	0.1	0.1	0.1	0.1	0.1	0.1	0.1	0.1	0.1	0.1	0.1	0.1	0.1	0.1	0.1	0.1	0.1	0.1	0.1	0.1	0.1	0.1	0.1	0.1	0.1	0.1	0.1	0.1	0.1	0.1	0.1	0.1	0.1	0.1	0.1	0.1	0.1	0.1	0.1	0.1	0.1	0.1	0.1	0.1
6739	0.1	0.1	0.1	0.1	0.1	0.1	0.1	0.1	0.1	0.1	0.1	0.1	0.1	0.1	0.1	0.1	0.1	0.1	0.1	0.1	0.1	0.1	0.1	0.1	0.1	0.1	0.1	0.1	0.1	0.1	0.1	0.1	0.1	0.1	0.1	0.1	0.1	0.1	0.1	0.1	0.1	0.1	0.1	0.1	0.1	0.1	0.1	0.1	0.1
6738	0.1	0.1	0.1	0.1	0.1	0.1	0.1	0.1	0.1	0.1	0.1	0.1	0.1	0.1	0.1	0.1	0.1	0.1	0.1	0.1	0.1	0.1	0.1	0.1	0.1	0.1	0.1	0.1	0.1	0.1	0.1	0.1	0.1	0.1	0.1	0.1	0.1	0.1	0.1	0.1	0.1	0.1	0.1	0.1	0.1	0.1	0.1	0.1	0.1
14	0.1	0.1	0.1	0.1	0.1	0.1	0.1	0.1	0.1	0.1	0.1	0.1	0.1	0.1	0.1	0.1	0.1	0.1	0.1	0.1	0.1	0.1	0.1	0.1	0.1	0.1	0.1	0.1	0.1	0.1	0.1	0.1	0.1	0.1	0.1	0.1	0.1	0.1	0.1	0.1	0.1	0.1	0.1	0.1	0.1	0.1	0.1	0.1	0.1
3926	0.1	0.1	0.1	0.1	0.1	0.1	0.1	0.1	0.1	0.1	0.1	0.1	0.1	0.1	0.1	0.1	0.1	0.1	0.1	0.1	0.1	0.1	0.1	0.1	0.1	0.1	0.1	0.1	0.1	0.1	0.1	0.1	0.1	0.1	0.1	0.1	0.1	0.1	0.1	0.1	0.1	0.1	0.1	0.1	0.1	0.1	0.1	0.1	0.1
4636	0.1	0.1	0.1	0.1	0.1	0.1	0.1	0.1	0.1	0.1	0.1	0.1	0.1	0.1	0.1	0.1	0.1	0.1	0.1	0.1	0.1	0.1	0.1	0.1	0.1	0.1	0.1	0.1	0.1	0.1	0.1	0.1	0.1	0.1	0.1	0.1	0.1	0.1	0.1	0.1	0.1	0.1	0.1	0.1	0.1	0.1	0.1	0.1	0.1
4571	0.1	0.1	0.1	0.1	0.1	0.1	0.1	0.1	0.1	0.1	0.1	0.1	0.1	0.1	0.1	0.1	0.1	0.1	0.1	0.1	0.1	0.1	0.1	0.1	0.1	0.1	0.1	0.1	0.1	0.1	0.1	0.1	0.1	0.1	0.1	0.1	0.1	0.1	0.1	0.1	0.1	0.1	0.1	0.1	0.1	0.1	0.1	0.1	0.1
4590	0.1	0.1	0.1	0.1	0.1	0.1	0.1	0.1	0.1	0.1	0.1	0.1	0.1	0.1	0.1	0.1	0.1	0.1	0.1	0.1	0.1	0.1	0.1	0.1	0.1	0.1	0.1	0.1	0.1	0.1	0.1	0.1	0.1	0.1	0.1	0.1	0.1	0.1	0.1	0.1	0.1	0.1	0.1	0.1	0.1	0.1	0.1	0.1	0.1
4654	0.1	0.1	0.1	0.1	0.1	0.1	0.1	0.1	0.1	0.1	0.1	0.1	0.1	0.1	0.1	0.1	0.1	0.1	0.1	0.1	0.1	0.1	0.1	0.1	0.1	0.1	0.1	0.1	0.1	0.1	0.1	0.1	0.1	0.1	0.1	0.1	0.1	0.1	0.1	0.1	0.1	0.1	0.1	0.1	0.1	0.1	0.1	0.1	0.1
4588	0.1	0.1	0.1	0.1	0.1	0.1	0.1	0.1	0.1	0.1	0.1	0.1	0.1	0.1	0.1	0.1	0.1	0.1	0.1	0.1	0.1	0.1	0.1	0.1	0.1	0.1	0.1	0.1	0.1	0.1	0.1	0.1	0.1	0.1	0.1	0.1	0.1	0.1	0.1	0.1	0.1	0.1	0.1	0.1	0.1	0.1	0.1	0.1	0.1
184	0.1	0.1	0.1	0.1	0.1	0.1	0.1	0.1	0.1	0.1	0.1	0.1	0.1	0.1	0.1	0.1	0.1	0.1	0.1	0.1	0.1	0.1	0.1	0.1	0.1	0.1	0.1	0.1	0.1	0.1	0.1	0.1	0.1	0.1	0.1	0.1	0.1	0.1	0.1	0.1	0.1	0.1	0.1	0.1	0.1	0.1	0.1	0.1	0.1
174	0.1	0.1	0.1	0.1	0.1	0.1	0.1	0.1	0.1	0.1	0.1	0.1	0.1	0.1	0.1	0.1	0.1	0.1	0.1	0.1	0.1	0.1	0.1	0.1	0.1	0.1	0.1	0.1	0.1	0.1	0.1	0.1	0.1	0.1	0.1	0.1	0.1	0.1	0.1	0.1	0.1	0.1	0.1	0.1	0.1	0.1	0.1	0.1	0.1
125	0.1	0.1	0.1	0.1	0.1	0.1	0.1	0.1	0.1	0.1	0.1	0.1	0.1	0.1	0.1	0.1	0.1	0.1	0.1	0.1	0.1	0.1	0.1	0.1	0.1	0.1	0.1	0.1	0.1	0.1	0.1	0.1	0.1	0.1	0.1	0.1	0.1	0.1	0.1	0.1	0.1	0.1	0.1	0.1	0.1	0.1	0.1	0.1	0.1
122	0.1	0.1	0.1	0.1	0.1	0.1	0.1	0.1	0.1	0.1	0.1	0.1	0.1	0.1	0.1	0.1	0.1	0.1	0.1	0.1	0.1	0.1	0.1	0.1	0.1	0.1	0.1	0.1	0.1	0.1	0.1	0.1	0.1	0.1	0.1	0.1	0.1	0.1	0.1	0.1	0.1	0.1	0.1	0.1	0.1	0.1	0.1	0.1	0.1
212	0.1	0.1	0.1	0.1	0.1	0.1	0.1	0.1	0.1	0.1	0.1	0.1	0.1	0.1	0.1	0.1	0.1	0.1	0.1	0.1	0.1	0.1	0.1	0.1	0.1	0.1	0.1	0.1	0.1	0.1	0.1	0.1	0.1	0.1	0.1	0.1	0.1	0.1	0.1	0.1	0.1	0.1	0.1	0.1	0.1	0.1	0.1	0.1	0.1
190	0.1	0.1	0.1	0.1	0.1	0.1	0.1	0.1	0.1	0.1	0.1	0.1	0.1	0.1	0.1	0.1	0.1	0.1	0.1	0.1	0.1	0.1	0.1	0.1	0.1	0.1	0.1	0.1	0.1	0.1	0.1	0.1	0.1	0.1	0.1	0.1	0.1	0.1	0.1	0.1	0.1	0.1	0.1	0.1	0.1	0.1	0.1	0.1	0.1
2961	0.1	0.1	0.1	0.1	0.1	0.1	0.1	0.1	0.1	0.1	0.1	0.1	0.1	0.1	0.1	0.1	0.1	0.1	0.1	0.1	0.1	0.1	0.1	0.1	0.1	0.1	0.1	0.1	0.1	0.1	0.1	0.1	0.1	0.1	0.1	0.1	0.1	0.1	0.1	0.1	0.1	0.1	0.1	0.1	0.1	0.1	0.1	0.1	0.1
2448	0.1	0.1	0.1	0.1	0.1	0.1	0.1	0.1	0.1	0.1	0.1	0.1	0.1	0.1	0.1	0.1	0.1	0.1	0.1	0.1	0.1	0.1	0.1	0.1	0.1	0.1	0.1	0.1	0.1	0.1	0.1	0.1	0.1	0.1	0.1	0.1	0.1	0.1	0.1	0.1	0.1	0.1	0.1	0.1	0.1	0.1	0.1	0.1	0.1
1860	0.1	0.1	0.1	0.1	0.1	0.1	0.1	0.1	0.1	0.1	0.1	0.1	0.1	0.1	0.1	0.1	0.1	0.1	0.1	0.1	0.1	0.1	0.1	0.1	0.1	0.1	0.1	0.1	0.1	0.1	0.1	0.1	0.1	0.1	0.1	0.1	0.1	0.1	0.1	0.1	0.1	0.1	0.1	0.1	0.1	0.1	0.1	0.1	0.1
81	0.1	0.1	0.1	0.1	0.1	0.1	0.1	0.1	0.1	0.1	0.1	0.1	0.1	0.1	0.1	0.1	0.1	0.1	0.1	0.1	0.1	0.1	0.1	0.1	0.1	0.1	0.1	0.1	0.1	0.1	0.1	0.1	0.1	0.1	0.1	0.1	0.1	0.1	0.1	0.1	0.1	0.1	0.1	0.1	0.1	0.1	0.1	0.1	0.1
2367	0.1	0.1	0.1	0.1	0.1	0.1	0.1	0.1	0.1	0.1	0.1	0.1	0.1	0.1	0.1	0.1	0.1	0.1	0.1	0.1	0.1	0.1	0.1	0.1	0.1	0.1	0.1	0.1	0.1	0.1	0.1	0.1	0.1	0.1	0.1	0.1	0.1	0.1	0.1	0.1	0.1	0.1	0.1	0.1	0.1	0.1	0.1	0.1	0.1
181	0.1	0.1	0.1	0.1	0.1	0.1	0.1	0.1	0.1	0.1	0.1	0.1	0.1	0.1	0.1	0.1	0.1	0.1	0.1	0.1	0.1	0.1	0.1	0.1	0.1	0.1	0.1	0.1	0.1	0.1	0.1	0.1	0.1	0.1	0.1	0.1	0.1	0.1	0.1	0.1	0.1	0.1	0.1	0.1	0.1	0.1	0.1	0.1	0.1
2928	0.1	0.1	0.1	0.1	0.1	0.1	0.1	0.1	0.1	0.1	0.1	0.1	0.1	0.1	0.1	0.1	0.1	0.1	0.1	0.1	0.1	0.1	0.1	0.1	0.1	0.1	0.1	0.1	0.1	0.1	0.1	0.1	0.1	0.1	0.1	0.1	0.1	0.1	0.1	0.1	0.1	0.1	0.1	0.1	0.1	0.1	0.1	0.1	0.1
2451	0.1	0.1	0.1	0.1	0.1	0.1	0.1	0.1	0.1	0.1	0.1	0.1	0.1	0.1	0.1	0.1	0.1	0.1	0.1	0.1	0.1	0.1	0.1	0.1	0.1	0.1	0.1	0.1	0.1	0.1	0.1	0.1	0.1	0.1	0.1	0.1	0.1	0.1	0.1	0.1	0.1	0.1	0.1	0.1	0.1	0.1	0.1	0.1	0.1
2287	0.1	0.1	0.1	0.1	0.1	0.1	0.1	0.1	0.1	0.1	0.1	0.1	0.1	0.1	0.1	0.1	0.1	0.1	0.1	0.1	0.1	0.1	0.1	0.1	0.1	0.1	0.1	0.1	0.1	0.1	0.1	0.1	0.1	0.1	0.1	0.1	0.1	0.1	0.1	0.1	0.1	0.1	0.1	0.1	0.1	0.1	0.1	0.1	0.1
2294	0.1	0.1	0.1	0.1	0.1	0.1	0.1	0.1	0.1	0.1	0.1	0.1	0.1	0.1	0.1	0.1	0.1	0.1	0.1	0.1	0.1	0.1	0.1	0.1	0.1	0.1	0.1	0.1	0.1	0.1	0.1	0.1	0.1	0.1	0.1	0.1	0.1	0.1	0.1	0.1	0.1	0.1	0.1	0.1	0.1	0.1	0.1	0.1	0.1
446	0.1	0.1	0.1	0.1	0.1	0.1	0.1	0.1	0.1	0.1	0.1	0.1	0.1	0.1	0.1	0.1	0.1	0.1	0.1	0.1	0.1	0.1	0.1	0.1	0.1	0.1	0.1	0.1	0.1	0.1	0.1	0.1	0.1	0.1	0.1	0.1	0.1	0.1	0.1	0.1	0.1	0.1	0.1	0.1	0.1	0.1	0.1	0.1	0.1
124	0.1	0.1	0.1	0.1	0.1	0.1	0.1	0.1	0.1	0.1	0.1	0.1	0.1	0.1	0.1	0.1	0.1	0.1	0.1	0.1	0.1	0.1	0.1	0.1	0.1	0.1	0.1	0.1	0.1	0.1	0.1	0.1	0.1	0.1	0.1	0.1	0.1	0.1	0.1	0.1	0.1	0.1	0.1	0.1	0.1	0.1	0.1	0.1	0.1
5491	0.1	0.1	0.1	0.1	0.1	0.1	0.1	0.1	0.1	0.1	0.1	0.1	0.1	0.1	0.1	0.1	0.1	0.1	0.1	0.1	0.1	0.1	0.1	0.1	0.1	0.1	0.1	0.1	0.1	0.1	0.1	0.1	0.1	0.1	0.1	0.1	0.1	0.1	0.1	0.1	0.1	0.1	0.1	0.1	0.1	0.1	0.1	0.1	0.1
2254	0.1	0.1	0.1	0.1	0.1	0.1	0.1	0.1	0.1	0.1	0.1	0.1	0.1	0.1	0.1	0.1	0.1	0.1	0.1	0.1	0.1	0.1	0.1	0.1	0.1	0.1	0.1	0.1	0.1	0.1	0.1	0.1	0.1	0.1	0.1	0.1	0.1	0.1	0.1	0.1	0.1	0.1	0.1	0.1	0.1	0.1	0.1	0.1	0.1
92	0.1	0.1	0.1	0.1	0.1	0.1	0.1	0.1	0.1	0.1	0.1	0.1	0.1	0.1	0.1	0.1	0.1	0.1	0.1	0.1	0.1	0.1	0.1	0.1	0.1	0.1	0.1	0.1	0.1	0.1	0.1	0.1	0.1	0.1	0.1	0.1	0.1	0.1	0.1	0.1	0.1	0.1	0.1	0.1	0.1	0.1	0.1	0.1	0.1
91	0.1	0.1	0.1	0.1	0.1	0.1	0.1	0.1	0.1	0.1	0.1	0.1	0.1	0.1	0.1	0.1	0.1	0.1	0.1	0.1	0.1	0.1	0.1	0.1	0.1	0.1	0.1	0.1	0.1	0.1	0.1	0.1	0.1	0.1	0.1	0.1	0.1	0.1	0.1	0.1	0.1	0.1	0.1	0.1	0.1	0.1	0.1	0.1	0.1
2253	0.1	0.1	0.1	0.1	0.1	0.1	0.1	0.1	0.1	0.1	0.1	0.1	0.1	0.1	0.1	0.1	0.1	0.1	0.1	0.1	0.1	0.1	0.1	0.1	0.1	0.1	0.1	0.1	0.1	0.1	0.1	0.1	0.1	0.1	0.1	0.1	0.1	0.1	0.1	0.1	0.1	0.1	0.1	0.1	0.1	0.1	0.1	0.1	0.1
2349	0.1	0.1	0.1	0.1	0.1	0.1	0.1	0.1	0.1	0.1	0.1	0.1	0.1	0.1	0.1	0.1	0.1	0.1	0.1	0.1	0.1	0.1	0.1	0.1	0.1	0.1	0.1	0.1	0.1	0.1	0.1	0.1	0.1	0.1	0.1	0.1	0.1	0.1	0.1	0.1	0.1	0.1	0.1	0.1	0.1	0.1	0.1	0.1	0.1
2274	0.1	0.1	0.1	0.1	0.1	0.1	0.1	0.1	0.1	0.1	0.1	0.1	0.1	0.1	0.1	0.1	0.1	0.1	0.1	0.1	0.1	0.1	0.1	0.1	0.1	0.1	0.1	0.1	0.1	0.1	0.1	0.1	0.1	0.1	0.1	0.1	0.1	0.1	0.1	0.1	0.1	0.1	0.1	0.1	0.1	0.1	0.1	0.1	0.1
4	0.1	0.1	0.1	0.1	0.1	0.1	0.1	0.1	0.1	0.1	0.1	0.1	0.1	0.1	0.1	0.1	0.1	0.1	0.1	0.1	0.1	0.1	0.1	0.1	0.1	0.1	0.1	0.1	0.1	0.1	0.1	0.1	0.1	0.1	0.1	0.1	0.1	0.1	0.1	0.1	0.1	0.1	0.1	0.1	0.1	0.1	0.1	0.1	0.1
70	0.1	0.1	0.1	0.1	0.1	0.1	0.1	0.1	0.1	0.1	0.1	0.1	0.1	0.1	0.1	0.1	0.1	0.1	0.1	0.1	0.1	0.1	0.1	0.1	0.1	0.1	0.1	0.1	0.1	0.1	0.1	0.1	0.1	0.1	0.1	0.1	0.1	0.1	0.1	0.1	0.1	0.1	0.1	0.1	0.1	0.1	0.1	0.1	0.1
90	0.1	0.1	0.1	0.1	0.1	0.1	0.1	0.1	0.1	0.1	0.1	0.1	0.1	0.1	0.1	0.1	0.1	0.1	0.1	0.1	0.1	0.1	0.1	0.1	0.1	0.1	0.1	0.1	0.1	0.1	0.1	0.1	0.1	0.1	0.1	0.1	0.1	0.1	0.1	0.1	0.1	0.1	0.1	0.1	0.1	0.1	0.1	0.1	0.1
56	0.1	0.1	0.1	0.1	0.1	0.1	0.1	0.1	0.1	0.1	0.1	0.1	0.1	0.1	0.1	0.1	0.1	0.1	0.1	0.1	0.1	0.1	0.1	0.1	0.1	0.1	0.1	0.1	0.1	0.1	0.1	0.1	0.1	0.1	0.1	0.1	0.1	0.1	0.1	0.1	0.1	0.1	0.1	0.1	0.1	0.1	0.1	0.1	0.1
112	0.1	0.1	0.1	0.1	0.1	0.1	0.1	0.1	0.1	0.1	0.1	0.1	0.1	0.1	0.1	0.1	0.1	0.1	0.1	0.1	0.1	0.1	0.1	0.1	0.1	0.1	0.1	0.1	0.1	0.1	0.1	0.1	0.1	0.1	0.1	0.1	0.1	0.1	0.1	0.1	0.1	0.1	0.1	0.1	0.1	0.1	0.1	0.1	0.1
82	0.1	0.1	0.1	0.1	0.1	0.1	0.1	0.1	0.1	0.1	0.1	0.1	0.1	0.1	0.1	0.1	0.1	0.1	0.1	0.1	0.1	0.1	0.1	0.1	0.1	0.1	0.1	0.1	0.1	0.1	0.1	0.1	0.1	0.1	0.1	0.1	0.1	0.1	0.1	0.1	0.1	0.1	0.1	0.1	0.1	0.1	0.1	0.1	0.1
119	0.1	0.1	0.1	0.1	0.1	0.1	0.1	0.1	0.1	0.1	0.1	0.1	0.1	0.1	0.1	0.1	0.1	0.1	0.1	0.1	0.1	0.1	0.1	0.1	0.1	0.1	0.1	0.1	0.1	0.1	0.1	0.1	0.1	0.1	0.1	0.1	0.1	0.1	0.1	0.1	0.1	0.1	0.1	0.1	0.1	0.1	0.1	0.1	0.1
111	0.1	0.1	0.1	0.1	0.1	0.1	0.1	0.1	0.1	0.1	0.1	0.1	0.1	0.1	0.1	0.1	0.1	0.1	0.1	0.1	0.1	0.1	0.1	0.1	0.1	0.1	0.1	0.1	0.1	0.1	0.1	0.1	0.1	0.1	0.1	0.1	0.1	0.1	0.1	0.1	0.1	0.1	0.1	0.1	0.1	0.1	0.1	0.1	0.1
84	0.1	0.1	0.1	0.1	0.1	0.1	0.1	0.1	0.1	0.1	0.1	0.1	0.1	0.1	0.1	0.1	0.1	0.1	0.1	0.1	0.1	0.1	0.1	0.1	0.1	0.1	0.1	0.1	0.1	0.1	0.1	0.1	0.1	0.1	0.1	0.1	0.1	0.1	0.1	0.1	0.1	0.1	0.1	0.1	0.1	0.1	0.1	0.1	0.1
32	0.1	0.1	0.1	0.1	0.1	0.1	0.1	0.1	0.1	0.1	0.1	0.1	0.1	0.1	0.1	0.1	0.1	0.1	0.1	0.1	0.1	0.1	0.1	0.1	0.1	0.1	0.1	0.1	0.1	0.1	0.1	0.1	0.1	0.1	0.1	0.1	0.1	0.1	0.1	0.1	0.1	0.1	0.1	0.1	0.1	0.1	0.1	0.1	0.1
79	0.1	0.1	0.1	0.1	0.1	0.1	0.1	0.1	0.1	0.1	0.1	0.1	0.1	0.1	0.1	0.1	0.1	0.1	0.1	0.1	0.1	0.1	0.1	0.1	0.1	0.1	0.1	0.1	0.1	0.1	0.1	0.1	0.1	0.1	0.1	0.1	0.1	0.1	0.1	0.1	0.1	0.1	0.1	0.1	0.1	0.1	0.1	0.1	0.1
2903	0.1	0.1	0.1	0.1	0.1	0.1	0.1	0.1	0.1	0.1	0.1	0.1	0.1	0.1	0.1	0.1	0.1	0.1	0.1	0.1	0.1	0.1	0.1	0.1	0.1	0.1	0.1	0.1	0.1	0.1	0.1	0.1	0.1	0.1	0.1	0.1	0.1	0.1	0.1	0.1	0.1	0.1	0.1	0.1	0.1	0.1	0.1	0.1	0.1
2801	0.1	0.1	0.1	0.1	0.1	0.1	0.1	0.1	0.1	0.1	0.1	0.1	0.1	0.1	0.1	0.1	0.1	0.1	0.1	0.1	0.1	0.1	0.1	0.1	0.1	0.1	0.1	0.1	0.1	0.1	0.1	0.1	0.1	0.1	0.1	0.1	0.1	0.1	0.1	0.1	0.1	0.1	0.1	0.1	0.1	0.1	0.1	0.1	0.1
39	0.1	0.1	0.1	0.1	0.1	0.1	0.1	0.1	0.1	0.1	0.1	0.1	0.1	0.1	0.1	0.1	0.1	0.1	0.1	0.1	0.1	0.1	0.1	0.1	0.1	0.1	0.1	0.1	0.1	0.1	0.1	0.1	0.1	0.1	0.1	0.1	0.1	0.1	0.1	0.1	0.1	0.1	0.1	0.1	0.1	0.1	0.1	0.1	0.1
4602	0.1	0.1	0.1	0.1	0.1	0.1	0.1	0.1	0.1	0.1	0.1	0.1	0.1	0.1	0.1	0.1	0.1	0.1	0.1	0.1	0.1	0.1	0.1	0.1	0.1	0.1	0.1	0.1	0.1	0.1	0.1	0.1	0.1	0.1	0.1	0.1	0.1	0.1	0.1	0.1	0.1	0.1	0.1	0.1	0.1	0.1	0.1	0.1	0.1
2454	0.1	0.1	0.1	0.1	0.1	0.1	0.1	0.1	0.1	0.1	0.1	0.1	0.1	0.1	0.1	0.1	0.1	0.1	0.1	0.1	0.1	0.1	0.1	0.1	0.1	0.1	0.1	0.1	0.1	0.1	0.1	0.1	0.1	0.1	0.1	0.1	0.1	0.1	0.1	0.1	0.1	0.1	0.1	0.1	0.1	0.1	0.1	0.1	0.1
131	0.1	0.1	0.1	0.1	0.1	0.1	0.1	0.1	0.1	0.1	0.1	0.1	0.1	0.1	0.1	0.1	0.1	0.1	0.1	0.1	0.1	0.1	0.1	0.1	0.1	0.1	0.1	0.1	0.1	0.1	0.1	0.1	0.1	0.1	0.1	0.1	0.1	0.1	0.1	0.1	0.1	0.1	0.1	0.1	0.1	0.1	0.1	0.1	0.1
2432	0.1	0.1	0.1	0.1	0.1	0.1	0.1	0.1	0.1	0.1	0.1	0.1	0.1	0.1	0.1	0.1	0.1	0.1	0.1	0.1	0.1	0.1	0.1	0.1	0.1	0.1	0.1	0.1	0.1	0.1	0.1	0.1	0.1	0.1	0.1	0.1	0.1	0.1	0.1	0.1	0.1	0.1	0.1	0.1	0.1	0.1	0.1	0.1	0.1
5055	0.1	0.1	0.1	0.1	0.1	0.1	0.1	0.1	0.1	0.1	0.1	0.1	0.1	0.1	0.1	0.1	0.1	0.1	0.1	0.1	0.1	0.1	0.1	0.1	0.1	0.1	0.1	0.1	0.1	0.1	0.1	0.1	0.1	0.1	0.1	0.1	0.1	0.1	0.1	0.1	0.1	0.1	0.1	0.1	0.1	0.1	0.1	0.1	0.1
2346	0.1	0.1	0.1	0.1	0.1	0.1	0.1	0.1	0.1	0.1	0.1	0.1	0.1	0.1	0.1	0.1	0.1	0.1	0.1	0.1	0.1	0.1	0.1	0.1	0.1	0.1	0.1	0.1	0.1	0.1	0.1	0.1	0.1	0.1	0.1	0.1	0.1	0.1	0.1	0.1	0.1	0.1	0.1	0.1	0.1	0.1	0.1	0.1	0.1
114	0.1	0.1	0.1	0.1	0.1	0.1	0.1	0.1	0.1	0.1	0.1	0.1	0.1	0.1	0.1	0.1	0.1	0.1	0.1	0.1	0.1	0.1	0.1	0.1	0.1	0.1	0.1	0.1	0.1	0.1	0.1	0.1	0.1	0.1	0.1	0.1	0.1	0.1	0.1	0.1	0.1	0.1	0.1	0.1	0.1	0.1	0.1	0.1	0.1
55	0.1	0.1	0.1	0.1	0.1	0.1	0.1	0.1	0.1	0.1	0.1	0.1	0.1	0.1	0.1	0.1	0.1	0.1	0.1	0.1	0.1	0.1	0.1	0.1	0.1	0.1	0.1	0.1	0.1	0.1	0.1	0.1	0.1	0.1	0.1	0.1	0.1	0.1	0.1	0.1	0.1	0.1	0.1	0.1	0.1	0.1	0.1	0.1	0.1
2378	0.1	0.1	0.1	0.1	0.1	0.1	0.1	0.1	0.1	0.1	0.1	0.1	0.1	0.1	0.1	0.1	0.1	0.1	0.1	0.1	0.1	0.1	0.1	0.1	0.1	0.1	0.1	0.1	0.1	0.1	0.1	0.1	0.1	0.1	0.1	0.1	0.1	0.1	0.1	0.1	0.1	0.1	0.1	0.1	0.1	0.1	0.1	0.1	0.1
45	0.1	0.1	0.1	0.1	0.1	0.1	0.1	0.1	0.1	0.1	0.1	0.1	0.1	0.1	0.1	0.1	0.1	0.1	0.1	0.1	0.1	0.1	0.1	0.1	0.1	0.1	0.1	0.1	0.1	0.1	0.1	0.1	0.1	0.1	0.1	0.1	0.1	0.1	0.1	0.1	0.1	0.1	0.1	0.1	0.1	0.1	0.1	0.1	0.1
102	0.1	0.1	0.1	0.1	0.1	0.1	0.1	0.1	0.1	0.1	0.1	0.1	0.1	0.1	0.1	0.1	0.1	0.1	0.1	0.1	0.1	0.1	0.1	0.1	0.1	0.1	0.1	0.1	0.1	0.1	0.1	0.1	0.1	0.1	0.1	0.1	0.1	0.1	0.1	0.1	0.1	0.1	0.1	0.1	0.1	0.1	0.1	0.1	0.1
2540	0.1	0.1	0.1	0.1	0.1	0.1	0.1	0.1	0.1	0.1	0.1	0.1	0.1	0.1	0.1	0.1	0.1	0.1	0.1	0.1	0.1	0.1	0.1	0.1	0.1	0.1	0.1	0.1	0.1	0.1	0.1	0.1	0.1	0.1	0.1	0.1	0.1	0.1	0.1	0.1	0.1	0.1	0.1	0.1	0.1	0.1	0.1	0.1	0.1
26	0.1	0.1	0.1	0.1	0.1	0.1	0.1	0.1	0.1	0.1	0.1	0.1	0.1	0.1	0.1	0.1	0.1	0.1	0.1	0.1	0.1	0.1	0.1	0.1	0.1	0.1	0.1	0.1	0.1	0.1	0.1	0.1	0.1	0.1	0.1	0.1	0.1	0.1	0.1	0.1	0.1	0.1	0.1	0.1	0.1	0.1	0.1	0.1	0.1
2347	0.1	0.1	0.1	0.1	0.1	0.1	0.1	0.1	0.1	0.1	0.1	0.1	0.1	0.1	0.1	0.1	0.1	0.1	0.1	0.1	0.1	0.1	0.1	0.1	0.1	0.1	0.1	0.1	0.1	0.1	0.1	0.1	0.1	0.1	0.1	0.1	0.1	0.1	0.1	0.1	0.1	0.1	0.1	0.1	0.1	0.1	0.1	0.1	0.1
54	0.1	0.1	0.1	0.1	0.1	0.1	0.1	0.1	0.1	0.1	0.1	0.1	0.1	0.1	0.1	0.1	0.1	0.1	0.1	0.1	0.1	0.1	0.1	0.1	0.1	0.1	0.1	0.1	0.1	0.1	0.1	0.1	0.1	0.1	0.1	0.1	0.1	0.1	0.1	0.1	0.1	0.1	0.1	0.1	0.1	0.1	0.1	0.1	0.1
57	0.1	0.1	0.1	0.1	0.1	0.1	0.1	0.1	0.1	0.1	0.1	0.1	0.1	0.1	0.1	0.1	0.1	0.1	0.1	0.1	0.1	0.1	0.1	0.1	0.1	0.1	0.1	0.1	0.1	0.1	0.1	0.1	0.1	0.1	0.1	0.1	0.1	0.1	0.1	0.1	0.1	0.1	0.1	0.1	0.1	0.1	0.1	0.1	0.1
103	0.1	0.1	0.1	0.1	0.1	0.1	0.1	0.1	0.1	0.1	0.1	0.1	0.1	0.1	0.1	0.1	0.1	0.1	0.1	0.1	0.1	0.1	0.1	0.1	0.1	0.1	0.1	0.1	0.1	0.1	0.1	0.1	0.1	0.1	0.1	0.1	0.1	0.1	0.1	0.1	0.1	0.1	0.1	0.1	0.1	0.1	0.1	0.1	0.1
4924	0.1	0.1	0.1	0.1	0.1	0.1	0.1	0.1	0.1	0.1	0.1	0.1	0.1	0.1	0.1	0.1	0.1	0.1	0.1	0.1	0.1	0.1	0.1	0.1	0.1	0.1	0.1	0.1	0.1	0.1	0.1	0.1	0.1	0.1	0.1	0.1	0.1	0.1	0.1	0.1	0.1	0.1	0.1	0.1	0.1	0.1	0.1	0.1	0.1
52	0.1	0.1	0.1	0.1	0.1	0.1	0.1	0.1	0.1	0.1	0.1	0.1	0.1	0.1	0.1	0.1	0.1	0.1	0.1	0.1	0.1	0.1	0.1	0.1	0.1	0.1	0.1	0.1	0.1	0.1	0.1	0.1	0.1	0.1	0.1	0.1	0.1	0.1	0.1	0.1	0.1	0.1	0.1	0.1	0.1	0.1	0.1	0.1	0.1
2445	0.1	0.1	0.1	0.1	0.1	0.1	0.1	0.1	0.1	0.1	0.1	0.1	0.1	0.1	0.1	0.1	0.1	0.1	0.1	0.1	0.1	0.1	0.1	0.1	0.1	0.1	0.1	0.1	0.1	0.1	0.1	0.1	0.1	0.1	0.1	0.1	0.1	0.1	0.1	0.1	0.1	0.1	0.1	0.1	0.1	0.1	0.1	0.1	0.1
371	0.1	0.1	0.1	0.1	0.1	0.1	0.1	0.1	0.1	0.1	0.1	0.1	0.1	0.1	0.1	0.1	0.1	0.1	0.1	0.1	0.1	0.1	0.1	0.1	0.1	0.1	0.1	0.1	0.1	0.1	0.1	0.1	0.1	0.1	0.1	0.1	0.1	0.1	0.1	0.1	0.1	0.1	0.1	0.1	0.1	0.1	0.1	0.1	0.1
2284	0.1	0.1	0.1	0.1	0.1	0.1	0.1	0.1	0.1	0.1	0.1	0.1	0.1	0.1	0.1	0.1	0.1	0.1	0.1	0.1	0.1	0.1	0.1	0.1	0.1	0.1	0.1	0.1	0.1	0.1	0.1	0.1	0.1	0.1	0.1	0.1	0.1	0.1	0.1	0.1	0.1	0.1	0.1	0.1	0.1	0.1	0.1	0.1	0.1
100	0.1	0.1	0.1	0.1	0.1	0.1	0.1	0.1	0.1	0.1	0.1	0.1	0.1	0.1	0.1	0.1	0.1	0.1	0.1	0.1	0.1	0.1	0.1	0.1	0.1	0.1	0.1	0.1	0.1	0.1	0.1	0.1	0.1	0.1	0.1	0.1	0.1	0.1	0.1	0.1	0.1	0.1	0.1	0.1	0.1	0.1	0.1	0.1	0.1
2894	0.1	0.1	0.1	0.1	0.1	0.1	0.1	0.1	0.1	0.1	0.1	0.1	0.1	0.1	0.1	0.1	0.1	0.1	0.1	0.1	0.1	0.1	0.1	0.1	0.1	0.1	0.1	0.1	0.1	0.1	0.1	0.1	0.1	0.1	0.1	0.1	0.1	0.1	0.1	0.1	0.1	0.1	0.1	0.1	0.1	0.1	0.1	0.1	0.1
128	0.1	0.1	0.1	0.1	0.1	0.1	0.1	0.1	0.1	0.1	0.1	0.1	0.1	0.1	0.1	0.1	0.1	0.1	0.1	0.1	0.1	0.1	0.1	0.1	0.1	0.1	0.1	0.1	0.1	0.1	0.1	0.1	0.1	0.1	0.1	0.1	0.1	0.1	0.1	0.1	0.1	0.1	0.1	0.1	0.1	0.1	0.1	0.1	0.1
4923	0.1	0.1	0.1	0.1	0.1	0.1	0.1	0.1	0.1	0.1	0.1	0.1	0.1	0.1	0.1	0.1	0.1	0.1	0.1	0.1	0.1	0.1	0.1	0.1	0.1	0.1	0.1	0.1	0.1	0.1	0.1	0.1	0.1	0.1	0.1	0.1	0.1	0.1	0.1	0.1	0.1	0.1	0.1	0.1	0.1	0.1	0.1	0.1	0.1
104	0.1	0.1	0.1	0.1	0.1	0.1	0.1	0.1	0.1	0.1	0.1	0.1	0.1	0.1	0.1	0.1	0.1	0.1	0.1	0.1	0.1	0.1	0.1	0.1	0.1	0.1	0.1	0.1	0.1	0.1	0.1	0.1	0.1	0.1	0.1	0.1	0.1	0.1	0.1	0.1	0.1	0.1	0.1	0.1	0.1	0.1	0.1	0.1	0.1
443	0.1	0.1	0.1	0.1	0.1	0.1	0.1	0.1	0.1	0.1	0.1	0.1	0.1	0.1	0.1	0.1	0.1	0.1	0.1	0.1	0.1	0.1	0.1	0.1	0.1	0.1	0.1	0.1	0.1	0.1	0.1	0.1	0.1	0.1	0.1	0.1	0.1	0.1	0.1	0.1	0.1	0.1	0.1	0.1	0.1	0.1	0.1	0.1	0.1
172	0.1	0.1	0.1	0.1	0.1	0.1	0.1	0.1	0.1	0.1	0.1	0.1	0.1	0.1	0.1	0.1	0.1	0.1	0.1	0.1	0.1	0.1	0.1	0.1	0.1	0.1	0.1	0.1	0.1	0.1	0.1	0.1	0.1	0.1	0.1	0.1	0.1	0.1	0.1	0.1	0.1	0.1	0.1	0.1	0.1	0.1	0.1	0.1	0.1
27	0.1	0.1	0.1	0.1	0.1	0.1	0.1	0.1	0.1	0.1	0.1	0.1	0.1	0.1	0.1	0.1	0.1	0.1	0.1	0.1	0.1	0.1	0.1	0.1	0.1	0.1	0.1	0.1	0.1	0.1	0.1	0.1	0.1	0.1	0.1	0.1	0.1	0.1	0.1	0.1	0.1	0.1	0.1	0.1	0.1	0.1	0.1	0.1	0.1
42	0.1	0.1	0.1	0.1	0.1	0.1	0.1	0.1	0.1	0.1	0.1	0.1	0.1	0.1	0.1	0.1	0.1	0.1	0.1	0.1	0.1	0.1	0.1	0.1	0.1	0.1	0.1	0.1	0.1	0.1	0.1	0.1	0.1	0.1	0.1	0.1	0.1	0.1	0.1	0.1	0.1	0.1	0.1	0.1	0.1	0.1	0.1	0.1	0.1
85	0.1	0.1	0.1	0.1	0.1	0.1	0.1	0.1	0.1	0.1	0.1	0.1	0.1	0.1	0.1	0.1	0.1	0.1	0.1	0.1	0.1	0.1	0.1	0.1	0.1	0.1	0.1	0.1	0.1	0.1	0.1	0.1	0.1	0.1	0.1	0.1	0.1	0.1	0.1	0.1	0.1	0.1	0.1	0.1	0.1	0.1	0.1	0.1	0.1
3959	0.1	0.1	0.1	0.1	0.1	0.1	0.1	0.1	0.1	0.1	0.1	0.1	0.1	0.1	0.1	0.1	0.1	0.1	0.1	0.1	0.1	0.1	0.1	0.1	0.1	0.1	0.1	0.1	0.1	0.1	0.1	0.1	0.1	0.1	0.1	0.1	0.1	0.1	0.1	0.1	0.1	0.1	0.1	0.1	0.1	0.1	0.1	0.1	0.1
266	0.1	0.1	0.1	0.1	0.1	0.1	0.1	0.1	0.1	0.1	0.1	0.1	0.1	0.1	0.1	0.1	0.1	0.1	0.1	0.1	0.1	0.1	0.1	0.1	0.1	0.1	0.1	0.1	0.1	0.1	0.1	0.1	0.1	0.1	0.1	0.1	0.1	0.1	0.1	0.1	0.1	0.1	0.1	0.1	0.1	0.1	0.1	0.1	0.1
199	0.1	0.1	0.1	0.1	0.1	0.1	0.1	0.1	0.1	0.1	0.1	0.1	0.1	0.1	0.1	0.1	0.1	0.1	0.1	0.1	0.1	0.1	0.1	0.1	0.1	0.1	0.1	0.1	0.1	0.1	0.1	0.1	0.1	0.1	0.1	0.1	0.1	0.1	0.1	0.1	0.1	0.1	0.1	0.1	0.1	0.1	0.1	0.1	0.1
5230	0.1	0.1	0.1	0.1	0.1	0.1	0.1	0.1	0.1	0.1	0.1	0.1	0.1	0.1	0.1	0.1	0.1	0.1	0.1	0.1	0.1	0.1	0.1	0.1	0.1	0.1	0.1	0.1	0.1	0.1	0.1	0.1	0.1	0.1	0.1	0.1	0.1	0.1	0.1	0.1	0.1	0.1	0.1	0.1	0.1	0.1	0.1	0.1	0.1
5208	0.1	0.1	0.1	0.1	0.1	0.1	0.1	0.1	0.1	0.1	0.1	0.1	0.1	0.1	0.1	0.1	0.1	0.1	0.1	0.1	0.1	0.1	0.1	0.1	0.1	0.1	0.1	0.1	0.1	0.1	0.1	0.1	0.1	0.1	0.1	0.1	0.1	0.1	0.1	0.1	0.1	0.1	0.1	0.1	0.1	0.1	0.1	0.1	0.1
2054	0.1	0.1	0.1	0.1	0.1	0.1	0.1	0.1	0.1	0.1	0.1	0.1	0.1	0.1	0.1	0.1	0.1	0.1	0.1	0.1	0.1	0.1	0.1	0.1	0.1	0.1	0.1	0.1	0.1	0.1	0.1	0.1	0.1	0.1	0.1	0.1	0.1	0.1	0.1	0.1	0.1	0.1	0.1	0.1	0.1	0.1	0.1	0.1	0.1
2198	0.1	0.1	0.1	0.1	0.1	0.1	0.1	0.1	0.1	0.1	0.1	0.1	0.1	0.1	0.1	0.1	0.1	0.1	0.1	0.1	0.1	0.1	0.1	0.1	0.1	0.1	0.1	0.1	0.1	0.1	0.1	0.1	0.1	0.1	0.1	0.1	0.1	0.1	0.1	0.1	0.1	0.1	0.1	0.1	0.1	0.1	0.1	0.1	0.1
2076	0.1	0.1	0.1	0.1	0.1	0.1	0.1	0.1	0.1	0.1	0.1	0.1	0.1	0.1	0.1	0.1	0.1	0.1	0.1	0.1	0.1	0.1	0.1	0.1	0.1	0.1	0.1	0.1	0.1	0.1	0.1	0.1	0.1	0.1	0.1	0.1	0.1	0.1	0.1	0.1	0.1	0.1	0.1	0.1	0.1	0.1	0.1	0.1	0.1
2381	0.1	0.1	0.1	0.1	0.1	0.1	0.1	0.1	0.1	0.1	0.1	0.1	0.1	0.1	0.1	0.1	0.1	0.1	0.1	0.1	0.1	0.1	0.1	0.1	0.1	0.1	0.1	0.1	0.1	0.1	0.1	0.1	0.1	0.1	0.1	0.1	0.1	0.1	0.1	0.1	0.1	0.1	0.1	0.1	0.1	0.1	0.1	0.1	0.1
2420	0.1	0.1	0.1	0.1	0.1	0.1	0.1	0.1	0.1	0.1	0.1	0.1	0.1	0.1	0.1	0.1	0.1	0.1	0.1	0.1	0.1	0.1	0.1	0.1	0.1	0.1	0.1	0.1	0.1	0.1	0.1	0.1	0.1	0.1	0.1	0.1	0.1	0.1	0.1	0.1	0.1	0.1	0.1	0.1	0.1	0.1	0.1	0.1	0.1
2406	0.1	0.1	0.1	0.1	0.1	0.1	0.1	0.1	0.1	0.1	0.1	0.1	0.1	0.1	0.1	0.1	0.1	0.1	0.1	0.1	0.1	0.1	0.1	0.1	0.1	0.1	0.1	0.1	0.1	0.1	0.1	0.1	0.1	0.1	0.1	0.1	0.1	0.1	0.1	0.1	0.1	0.1	0.1	0.1	0.1	0.1	0.1	0.1	0.1
2377	0.1	0.1	0.1	0.1	0.1	0.1	0.1	0.1	0.1	0.1	0.1	0.1	0.1	0.1	0.1	0.1	0.1	0.1	0.1	0.1	0.1	0.1	0.1	0.1	0.1	0.1	0.1	0.1	0.1	0.1	0.1	0.1	0.1	0.1	0.1	0.1	0.1	0.1	0.1	0.1	0.1	0.1	0.1	0.1	0.1	0.1	0.1	0.1	0.1
2382	0.1	0.1	0.1	0.1	0.1	0.1	0.1	0.1	0.1	0.1	0.1	0.1	0.1	0.1	0.1	0.1	0.1	0.1	0.1	0.1	0.1	0.1	0.1	0.1	0.1	0.1	0.1	0.1	0.1	0.1	0.1	0.1	0.1	0.1	0.1	0.1	0.1	0.1	0.1	0.1	0.1	0.1	0.1	0.1	0.1	0.1	0.1	0.1	0.1
2380	0.1	0.1	0.1	0.1	0.1	0.1	0.1	0.1	0.1	0.1	0.1	0.1	0.1	0.1	0.1	0.1	0.1	0.1	0.1	0.1	0.1	0.1	0.1	0.1	0.1	0.1	0.1	0.1	0.1	0.1	0.1	0.1	0.1	0.1	0.1	0.1	0.1	0.1	0.1	0.1	0.1	0.1	0.1	0.1	0.1	0.1	0.1	0.1	0.1
2407	0.1	0.1	0.1	0.1	0.1	0.1	0.1	0.1	0.1	0.1	0.1	0.1	0.1	0.1	0.1	0.1	0.1	0.1	0.1	0.1	0.1	0.1	0.1	0.1	0.1	0.1	0.1	0.1	0.1	0.1	0.1	0.1	0.1	0.1	0.1	0.1	0.1	0.1	0.1	0.1	0.1	0.1	0.1	0.1	0.1	0.1	0.1	0.1	0.1
2421	0.1	0.1	0.1	0.1	0.1	0.1	0.1	0.1	0.1	0.1	0.1	0.1	0.1	0.1	0.1	0.1	0.1	0.1	0.1	0.1	0.1	0.1	0.1	0.1	0.1	0.1	0.1	0.1	0.1	0.1	0.1	0.1	0.1	0.1	0.1	0.1	0.1	0.1	0.1	0.1	0.1	0.1	0.1	0.1	0.1	0.1	0.1	0.1	0.1
185	0.1	0.1	0.1	0.1	0.1	0.1	0.1	0.1	0.1	0.1	0.1	0.1	0.1	0.1	0.1	0.1	0.1	0.1	0.1	0.1	0.1	0.1	0.1	0.1	0.1	0.1	0.1	0.1	0.1	0.1	0.1	0.1	0.1	0.1	0.1	0.1	0.1	0.1	0.1	0.1	0.1	0.1	0.1	0.1	0.1	0.1	0.1	0.1	0.1
88	0.1	0.1	0.1	0.1	0.1	0.1	0.1	0.1	0.1	0.1	0.1	0.1	0.1	0.1	0.1	0.1	0.1	0.1	0.1	0.1	0.1	0.1	0.1	0.1	0.1	0.1	0.1	0.1	0.1	0.1	0.1	0.1	0.1	0.1	0.1	0.1	0.1	0.1	0.1	0.1	0.1	0.1	0.1	0.1	0.1	0.1	0.1	0.1	0.1
69	0.1	0.1	0.1	0.1	0.1	0.1	0.1	0.1	0.1	0.1	0.1	0.1	0.1	0.1	0.1	0.1	0.1	0.1	0.1	0.1	0.1	0.1	0.1	0.1	0.1	0.1	0.1	0.1	0.1	0.1	0.1	0.1	0.1	0.1	0.1	0.1	0.1	0.1	0.1	0.1	0.1	0.1	0.1	0.1	0.1	0.1	0.1	0.1	0.1
64	0.1	0.1	0.1	0.1	0.1	0.1	0.1	0.1	0.1	0.1	0.1	0.1	0.1	0.1	0.1	0.1	0.1	0.1	0.1	0.1	0.1	0.1	0.1	0.1	0.1	0.1	0.1	0.1	0.1	0.1	0.1	0.1	0.1	0.1	0.1	0.1	0.1	0.1	0.1	0.1	0.1	0.1	0.1	0.1	0.1	0.1	0.1	0.1	0.1
109	0.1	0.1	0.1	0.1	0.1	0.1	0.1	0.1	0.1	0.1	0.1	0.1	0.1	0.1	0.1	0.1	0.1	0.1	0.1	0.1	0.1	0.1	0.1	0.1	0.1	0.1	0.1	0.1	0.1	0.1	0.1	0.1	0.1	0.1	0.1	0.1	0.1	0.1	0.1	0.1	0.1	0.1	0.1	0.1	0.1	0.1	0.1	0.1	0.1
107	0.1	0.1	0.1	0.1	0.1	0.1	0.1	0.1	0.1	0.1	0.1	0.1	0.1	0.1	0.1	0.1	0.1	0.1	0.1	0.1	0.1	0.1	0.1	0.1	0.1	0.1	0.1	0.1	0.1	0.1	0.1	0.1	0.1	0.1	0.1	0.1	0.1	0.1	0.1	0.1	0.1	0.1	0.1	0.1	0.1	0.1	0.1	0.1	0.1
68	0.1	0.1	0.1	0.1	0.1	0.1	0.1	0.1	0.1	0.1	0.1	0.1	0.1	0.1	0.1	0.1	0.1	0.1	0.1	0.1	0.1	0.1	0.1	0.1	0.1	0.1	0.1	0.1	0.1	0.1	0.1	0.1	0.1	0.1	0.1	0.1	0.1	0.1	0.1	0.1	0.1	0.1	0.1	0.1	0.1	0.1	0.1	0.1	0.1
129	0.1	0.1	0.1	0.1	0.1	0.1	0.1	0.1	0.1	0.1	0.1	0.1	0.1	0.1	0.1	0.1	0.1	0.1	0.1	0.1	0.1	0.1	0.1	0.1	0.1	0.1	0.1	0.1	0.1	0.1	0.1	0.1	0.1	0.1	0.1	0.1	0.1	0.1	0.1	0.1	0.1	0.1	0.1	0.1	0.1	0.1	0.1	0.1	0.1
306	0.1	0.1	0.1	0.1	0.1	0.1	0.1	0.1	0.1	0.1	0.1	0.1	0.1	0.1	0.1	0.1	0.1	0.1	0.1	0.1	0.1	0.1	0.1	0.1	0.1	0.1	0.1	0.1	0.1	0.1	0.1	0.1	0.1	0.1	0.1	0.1	0.1	0.1	0.1	0.1	0.1	0.1	0.1	0.1	0.1	0.1	0.1	0.1	0.1
130	0.1	0.1	0.1	0.1	0.1	0.1	0.1	0.1	0.1	0.1	0.1	0.1	0.1	0.1	0.1	0.1	0.1	0.1	0.1	0.1	0.1	0.1	0.1	0.1	0.1	0.1	0.1	0.1	0.1	0.1	0.1	0.1	0.1	0.1	0.1	0.1	0.1	0.1	0.1	0.1	0.1	0.1	0.1	0.1	0.1	0.1	0.1	0.1	0.1
4679	0.1	0.1	0.1	0.1	0.1	0.1	0.1	0.1	0.1	0.1	0.1	0.1	0.1	0.1	0.1	0.1	0.1	0.1	0.1	0.1	0.1	0.1	0.1	0.1	0.1	0.1	0.1	0.1	0.1	0.1	0.1	0.1	0.1	0.1	0.1	0.1	0.1	0.1	0.1	0.1	0.1	0.1	0.1	0.1	0.1	0.1	0.1	0.1	0.1
4678	0.1	0.1	0.1	0.1	0.1	0.1	0.1	0.1	0.1	0.1	0.1	0.1	0.1	0.1	0.1	0.1	0.1	0.1	0.1	0.1	0.1	0.1	0.1	0.1	0.1	0.1	0.1	0.1	0.1	0.1	0.1	0.1	0.1	0.1	0.1	0.1	0.1	0.1	0.1	0.1	0.1	0.1	0.1	0.1	0.1	0.1	0.1	0.1	0.1
126	0.1	0.1	0.1	0.1	0.1	0.1	0.1	0.1	0.1	0.1	0.1	0.1	0.1	0.1	0.1	0.1	0.1	0.1	0.1	0.1	0.1	0.1	0.1	0.1	0.1	0.1	0.1	0.1	0.1	0.1	0.1	0.1	0.1	0.1	0.1	0.1	0.1	0.1	0.1	0.1	0.1	0.1	0.1	0.1	0.1	0.1	0.1	0.1	0.1
30	0.1	0.1	0.1	0.1	0.1	0.1	0.1	0.1	0.1	0.1	0.1	0.1	0.1	0.1	0.1	0.1	0.1	0.1	0.1	0.1	0.1	0.1	0.1	0.1	0.1	0.1	0.1	0.1	0.1	0.1	0.1	0.1	0.1	0.1	0.1	0.1	0.1	0.1	0.1	0.1	0.1	0.1	0.1	0.1	0.1	0.1	0.1	0.1	0.1
193	0.1	0.1	0.1	0.1	0.1	0.1	0.1	0.1	0.1	0.1	0.1	0.1	0.1	0.1	0.1	0.1	0.1	0.1	0.1	0.1	0.1	0.1	0.1	0.1	0.1	0.1	0.1	0.1	0.1	0.1	0.1	0.1	0.1	0.1	0.1	0.1	0.1	0.1	0.1	0.1	0.1	0.1	0.1	0.1	0.1	0.1	0.1	0.1	0.1
22	0.1	0.1	0.1	0.1	0.1	0.1	0.1	0.1	0.1	0.1	0.1	0.1	0.1	0.1	0.1	0.1	0.1	0.1	0.1	0.1	0.1	0.1	0.1	0.1	0.1	0.1	0.1	0.1	0.1	0.1	0.1	0.1	0.1	0.1	0.1	0.1	0.1	0.1	0.1	0.1	0.1	0.1	0.1	0.1	0.1	0.1	0.1	0.1	0.1
105	0.1	0.1	0.1	0.1	0.1	0.1	0.1	0.1	0.1	0.1	0.1	0.1	0.1	0.1	0.1	0.1	0.1	0.1	0.1	0.1	0.1	0.1	0.1	0.1	0.1	0.1	0.1	0.1	0.1	0.1	0.1	0.1	0.1	0.1	0.1	0.1	0.1	0.1	0.1	0.1	0.1	0.1	0.1	0.1	0.1	0.1	0.1	0.1	0.1
80	0.1	0.1	0.1	0.1	0.1	0.1	0.1	0.1	0.1	0.1	0.1	0.1	0.1	0.1	0.1	0.1	0.1	0.1	0.1	0.1	0.1	0.1	0.1	0.1	0.1	0.1	0.1	0.1	0.1	0.1	0.1	0.1	0.1	0.1	0.1	0.1	0.1	0.1	0.1	0.1	0.1	0.1	0.1	0.1	0.1	0.1	0.1	0.1	0.1
106	0.1	0.1	0.1	0.1	0.1	0.1	0.1	0.1	0.1	0.1	0.1	0.1	0.1	0.1	0.1	0.1	0.1	0.1	0.1	0.1	0.1	0.1	0.1	0.1	0.1	0.1	0.1	0.1	0.1	0.1	0.1	0.1	0.1	0.1	0.1	0.1	0.1	0.1	0.1	0.1	0.1	0.1	0.1	0.1	0.1	0.1	0.1	0.1	0.1
188	0.1	0.1	0.1	0.1	0.1	0.1	0.1	0.1	0.1	0.1	0.1	0.1	0.1	0.1	0.1	0.1	0.1	0.1	0.1	0.1	0.1	0.1	0.1	0.1	0.1	0.1	0.1	0.1	0.1	0.1	0.1	0.1	0.1	0.1	0.1	0.1	0.1	0.1	0.1	0.1	0.1	0.1	0.1	0.1	0.1	0.1	0.1	0.1	0.1
194	0.1	0.1	0.1	0.1	0.1	0.1	0.1	0.1	0.1	0.1	0.1	0.1	0.1	0.1	0.1	0.1	0.1	0.1	0.1	0.1	0.1	0.1	0.1	0.1	0.1	0.1	0.1	0.1	0.1	0.1	0.1	0.1	0.1	0.1	0.1	0.1	0.1	0.1	0.1	0.1	0.1	0.1	0.1	0.1	0.1	0.1	0.1	0.1	0.1
108	0.1	0.1	0.1	0.1	0.1	0.1	0.1	0.1	0.1	0.1	0.1	0.1	0.1	0.1	0.1	0.1	0.1	0.1	0.1	0.1	0.1	0.1	0.1	0.1	0.1	0.1	0.1	0.1	0.1	0.1	0.1	0.1	0.1	0.1	0.1	0.1	0.1	0.1	0.1	0.1	0.1	0.1	0.1	0.1	0.1	0.1	0.1	0.1	0.1
186	0.1	0.1	0.1	0.1	0.1	0.1	0.1	0.1	0.1	0.1	0.1	0.1	0.1	0.1	0.1	0.1	0.1	0.1	0.1	0.1	0.1	0.1	0.1	0.1	0.1	0.1	0.1	0.1	0.1	0.1	0.1	0.1	0.1	0.1	0.1	0.1	0.1	0.1	0.1	0.1	0.1	0.1	0.1	0.1	0.1	0.1	0.1	0.1	0.1
67	0.1	0.1	0.1	0.1	0.1	0.1	0.1	0.1	0.1	0.1	0.1	0.1	0.1	0.1	0.1	0.1	0.1	0.1	0.1	0.1	0.1	0.1	0.1	0.1	0.1	0.1	0.1	0.1	0.1	0.1	0.1	0.1	0.1	0.1	0.1	0.1	0.1	0.1	0.1	0.1	0.1	0.1	0.1	0.1	0.1	0.1	0.1	0.1	0.1
28	0.1	0.1	0.1	0.1	0.1	0.1	0.1	0.1	0.1	0.1	0.1	0.1	0.1	0.1	0.1	0.1	0.1	0.1	0.1	0.1	0.1	0.1	0.1	0.1	0.1	0.1	0.1	0.1	0.1	0.1	0.1	0.1	0.1	0.1	0.1	0.1	0.1	0.1	0.1	0.1	0.1	0.1	0.1	0.1	0.1	0.1	0.1	77.9984	0.1
213	0.1	0.1	0.1	0.1	0.1	0.1	0.1	0.1	0.1	0.1	0.1	0.1	0.1	0.1	0.1	0.1	0.1	0.1	0.1	0.1	0.1	0.1	0.1	0.1	0.1	0.1	0.1	0.1	0.1	0.1	0.1	0.1	0.1	0.1	0.1	0.1	0.1	0.1	0.1	0.1	0.1	0.1	0.1	0.1	0.1	0.1	0.1	0.1	0.1
198	0.1	0.1	0.1	0.1	0.1	0.1	0.1	0.1	0.1	0.1	0.1	0.1	0.1	0.1	0.1	0.1	0.1	0.1	0.1	0.1	0.1	0.1	0.1	0.1	0.1	0.1	0.1	0.1	0.1	0.1	0.1	0.1	0.1	0.1	0.1	0.1	0.1	0.1	0.1	0.1	0.1	0.1	0.1	0.1	0.1	0.1	0.1	0.1	0.1
180	0.1	0.1	0.1	0.1	0.1	0.1	0.1	0.1	0.1	0.1	0.1	0.1	0.1	0.1	0.1	0.1	0.1	0.1	0.1	0.1	0.1	0.1	0.1	0.1	0.1	0.1	0.1	0.1	0.1	0.1	0.1	0.1	0.1	0.1	0.1	0.1	0.1	0.1	0.1	0.1	0.1	0.1	0.1	0.1	0.1	0.1	0.1	0.1	0.1
204	0.1	0.1	0.1	0.1	0.1	0.1	0.1	0.1	0.1	0.1	0.1	0.1	0.1	0.1	0.1	0.1	0.1	0.1	0.1	0.1	0.1	0.1	0.1	0.1	0.1	0.1	0.1	0.1	0.1	0.1	0.1	0.1	0.1	0.1	0.1	0.1	0.1	0.1	0.1	0.1	0.1	0.1	0.1	0.1	0.1	0.1	0.1	0.1	0.1
187	0.1	0.1	0.1	0.1	0.1	0.1	0.1	0.1	0.1	0.1	0.1	0.1	0.1	0.1	0.1	0.1	0.1	0.1	0.1	0.1	0.1	0.1	0.1	0.1	0.1	0.1	0.1	0.1	0.1	0.1	0.1	0.1	0.1	0.1	0.1	0.1	0.1	0.1	0.1	0.1	0.1	0.1	0.1	0.1	0.1	0.1	0.1	0.1	0.1
200	0.1	0.1	0.1	0.1	0.1	0.1	0.1	0.1	0.1	0.1	0.1	0.1	0.1	0.1	0.1	0.1	0.1	0.1	0.1	0.1	0.1	0.1	0.1	0.1	0.1	0.1	0.1	0.1	0.1	0.1	0.1	0.1	0.1	0.1	0.1	0.1	0.1	0.1	0.1	0.1	0.1	0.1	0.1	0.1	0.1	0.1	0.1	0.1	0.1
201	0.1	0.1	0.1	0.1	0.1	0.1	0.1	0.1	0.1	0.1	0.1	0.1	0.1	0.1	0.1	0.1	0.1	0.1	0.1	0.1	0.1	0.1	0.1	0.1	0.1	0.1	0.1	0.1	0.1	0.1	0.1	0.1	0.1	0.1	0.1	0.1	0.1	0.1	0.1	0.1	0.1	0.1	0.1	0.1	0.1	0.1	0.1	0.1	0.1
173	0.1	0.1	0.1	0.1	0.1	0.1	0.1	0.1	0.1	0.1	0.1	0.1	0.1	0.1	0.1	0.1	0.1	0.1	0.1	0.1	0.1	0.1	0.1	0.1	0.1	0.1	0.1	0.1	0.1	0.1	0.1	0.1	0.1	0.1	0.1	0.1	0.1	0.1	0.1	0.1	0.1	0.1	0.1	0.1	0.1	0.1	0.1	0.1	0.1
66	0.1	0.1	0.1	0.1	0.1	0.1	0.1	0.1	0.1	0.1	0.1	0.1	0.1	0.1	0.1	0.1	0.1	0.1	0.1	0.1	0.1	0.1	0.1	0.1	0.1	0.1	0.1	0.1	0.1	0.1	0.1	0.1	0.1	0.1	0.1	0.1	0.1	0.1	0.1	0.1	0.1	0.1	0.1	0.1	0.1	0.1	0.1	0.1	0.1
178	0.1	0.1	0.1	0.1	0.1	0.1	0.1	0.1	0.1	0.1	0.1	0.1	0.1	0.1	0.1	0.1	0.1	0.1	0.1	0.1	0.1	0.1	0.1	0.1	0.1	0.1	0.1	0.1	0.1	0.1	0.1	0.1	0.1	0.1	0.1	0.1	0.1	0.1	0.1	0.1	0.1	0.1	0.1	0.1	0.1	0.1	0.1	0.1	0.1
183	0.1	0.1	0.1	0.1	0.1	0.1	0.1	0.1	0.1	0.1	0.1	0.1	0.1	0.1	0.1	0.1	0.1	0.1	0.1	0.1	0.1	0.1	0.1	0.1	0.1	0.1	0.1	0.1	0.1	0.1	0.1	0.1	0.1	0.1	0.1	0.1	0.1	0.1	0.1	0.1	0.1	0.1	0.1	0.1	0.1	0.1	0.1	0.1	0.1
5521	0.1	0.1	0.1	0.1	0.1	0.1	0.1	0.1	0.1	0.1	0.1	0.1	0.1	0.1	0.1	0.1	0.1	0.1	0.1	0.1	0.1	0.1	0.1	0.1	0.1	0.1	0.1	0.1	0.1	0.1	0.1	0.1	0.1	0.1	0.1	0.1	0.1	0.1	0.1	0.1	0.1	0.1	0.1	0.1	0.1	0.1	0.1	0.1	0.1
192	0.1	0.1	0.1	0.1	0.1	0.1	0.1	0.1	0.1	0.1	0.1	0.1	0.1	0.1	0.1	0.1	0.1	0.1	0.1	0.1	0.1	0.1	0.1	0.1	0.1	0.1	0.1	0.1	0.1	0.1	0.1	0.1	0.1	0.1	0.1	0.1	0.1	0.1	0.1	0.1	0.1	0.1	0.1	0.1	0.1	0.1	0.1	0.1	0.1
65	0.1	0.1	0.1	0.1	0.1	0.1	0.1	0.1	0.1	0.1	0.1	0.1	0.1	0.1	0.1	0.1	0.1	0.1	0.1	0.1	0.1	0.1	0.1	0.1	0.1	0.1	0.1	0.1	0.1	0.1	0.1	0.1	0.1	0.1	0.1	0.1	0.1	0.1	0.1	0.1	0.1	0.1	0.1	0.1	0.1	0.1	0.1	0.1	0.1
2707	0.1	0.1	0.1	0.1	0.1	0.1	0.1	0.1	0.1	0.1	0.1	0.1	0.1	0.1	0.1	0.1	0.1	0.1	0.1	0.1	0.1	0.1	0.1	0.1	0.1	0.1	0.1	0.1	0.1	0.1	0.1	0.1	0.1	0.1	0.1	0.1	0.1	0.1	0.1	0.1	0.1	0.1	0.1	0.1	0.1	0.1	0.1	0.1	0.1
94	0.1	0.1	0.1	0.1	0.1	0.1	0.1	0.1	0.1	0.1	0.1	0.1	0.1	0.1	0.1	0.1	0.1	0.1	0.1	0.1	0.1	0.1	0.1	0.1	0.1	0.1	0.1	0.1	0.1	0.1	0.1	0.1	0.1	0.1	0.1	0.1	0.1	0.1	0.1	0.1	0.1	0.1	0.1	0.1	0.1	0.1	0.1	0.1	0.1
368	0.1	0.1	0.1	0.1	0.1	0.1	0.1	0.1	0.1	0.1	0.1	0.1	0.1	0.1	0.1	0.1	0.1	0.1	0.1	0.1	0.1	0.1	0.1	0.1	0.1	0.1	0.1	0.1	0.1	0.1	0.1	0.1	0.1	0.1	0.1	0.1	0.1	0.1	0.1	0.1	0.1	0.1	0.1	0.1	0.1	0.1	0.1	0.1	0.1
1782	0.1	0.1	0.1	0.1	0.1	0.1	0.1	0.1	0.1	0.1	0.1	0.1	0.1	0.1	0.1	0.1	0.1	0.1	0.1	0.1	0.1	0.1	0.1	0.1	0.1	0.1	0.1	0.1	0.1	0.1	0.1	0.1	0.1	0.1	0.1	0.1	0.1	0.1	0.1	0.1	0.1	0.1	0.1	0.1	0.1	0.1	0.1	0.1	0.1
175	0.1	0.1	0.1	0.1	0.1	0.1	0.1	0.1	0.1	0.1	0.1	0.1	0.1	0.1	0.1	0.1	0.1	0.1	0.1	0.1	0.1	0.1	0.1	0.1	0.1	0.1	0.1	0.1	0.1	0.1	0.1	0.1	0.1	0.1	0.1	0.1	0.1	0.1	0.1	0.1	0.1	0.1	0.1	0.1	0.1	0.1	0.1	0.1	0.1
1879	0.1	0.1	0.1	0.1	0.1	0.1	0.1	0.1	0.1	0.1	0.1	0.1	0.1	0.1	0.1	0.1	0.1	0.1	0.1	0.1	0.1	0.1	0.1	0.1	0.1	0.1	0.1	0.1	0.1	0.1	0.1	0.1	0.1	0.1	0.1	0.1	0.1	0.1	0.1	0.1	0.1	0.1	0.1	0.1	0.1	0.1	0.1	0.1	0.1
4719	0.1	0.1	0.1	0.1	0.1	0.1	0.1	0.1	0.1	0.1	0.1	0.1	0.1	0.1	0.1	0.1	0.1	0.1	0.1	0.1	0.1	0.1	0.1	0.1	0.1	0.1	0.1	0.1	0.1	0.1	0.1	0.1	0.1	0.1	0.1	0.1	0.1	0.1	0.1	0.1	0.1	0.1	0.1	0.1	0.1	0.1	0.1	0.1	0.1
196	0.1	0.1	0.1	0.1	0.1	0.1	0.1	0.1	0.1	0.1	0.1	0.1	0.1	0.1	0.1	0.1	0.1	0.1	0.1	0.1	0.1	0.1	0.1	0.1	0.1	0.1	0.1	0.1	0.1	0.1	0.1	0.1	0.1	0.1	0.1	0.1	0.1	0.1	0.1	0.1	0.1	0.1	0.1	0.1	0.1	0.1	0.1	0.1	0.1
205	0.1	0.1	0.1	0.1	0.1	0.1	0.1	0.1	0.1	0.1	0.1	0.1	0.1	0.1	0.1	0.1	0.1	0.1	0.1	0.1	0.1	0.1	0.1	0.1	0.1	0.1	0.1	0.1	0.1	0.1	0.1	0.1	0.1	0.1	0.1	0.1	0.1	0.1	0.1	0.1	0.1	0.1	0.1	0.1	0.1	0.1	0.1	0.1	0.1
2255	0.1	0.1	0.1	0.1	0.1	0.1	0.1	0.1	0.1	0.1	0.1	0.1	0.1	0.1	0.1	0.1	0.1	0.1	0.1	0.1	0.1	0.1	0.1	0.1	0.1	0.1	0.1	0.1	0.1	0.1	0.1	0.1	0.1	0.1	0.1	0.1	0.1	0.1	0.1	0.1	0.1	0.1	0.1	0.1	0.1	0.1	0.1	0.1	0.1
2302	0.1	0.1	0.1	0.1	0.1	0.1	0.1	0.1	0.1	0.1	0.1	0.1	0.1	0.1	0.1	0.1	0.1	0.1	0.1	0.1	0.1	0.1	0.1	0.1	0.1	0.1	0.1	0.1	0.1	0.1	0.1	0.1	0.1	0.1	0.1	0.1	0.1	0.1	0.1	0.1	0.1	0.1	0.1	0.1	0.1	0.1	0.1	0.1	0.1
208	0.1	0.1	0.1	0.1	0.1	0.1	0.1	0.1	0.1	0.1	0.1	0.1	0.1	0.1	0.1	0.1	0.1	0.1	0.1	0.1	0.1	0.1	0.1	0.1	0.1	0.1	0.1	0.1	0.1	0.1	0.1	0.1	0.1	0.1	0.1	0.1	0.1	0.1	0.1	0.1	0.1	0.1	0.1	0.1	0.1	0.1	0.1	0.1	0.1
197	0.1	0.1	0.1	0.1	0.1	0.1	0.1	0.1	0.1	0.1	0.1	0.1	0.1	0.1	0.1	0.1	0.1	0.1	0.1	0.1	0.1	0.1	0.1	0.1	0.1	0.1	0.1	0.1	0.1	0.1	0.1	0.1	0.1	0.1	0.1	0.1	0.1	0.1	0.1	0.1	0.1	0.1	0.1	0.1	0.1	0.1	0.1	0.1	0.1
2289	0.1	0.1	0.1	0.1	0.1	0.1	0.1	0.1	0.1	0.1	0.1	0.1	0.1	0.1	0.1	0.1	0.1	0.1	0.1	0.1	0.1	0.1	0.1	0.1	0.1	0.1	0.1	0.1	0.1	0.1	0.1	0.1	0.1	0.1	0.1	0.1	0.1	0.1	0.1	0.1	0.1	0.1	0.1	0.1	0.1	0.1	0.1	0.1	0.1
191	0.1	0.1	0.1	0.1	0.1	0.1	0.1	0.1	0.1	0.1	0.1	0.1	0.1	0.1	0.1	0.1	0.1	0.1	0.1	0.1	0.1	0.1	0.1	0.1	0.1	0.1	0.1	0.1	0.1	0.1	0.1	0.1	0.1	0.1	0.1	0.1	0.1	0.1	0.1	0.1	0.1	0.1	0.1	0.1	0.1	0.1	0.1	0.1	0.1
1768	0.1	0.1	0.1	0.1	0.1	0.1	0.1	0.1	0.1	0.1	0.1	0.1	0.1	0.1	0.1	0.1	0.1	0.1	0.1	0.1	0.1	0.1	0.1	0.1	0.1	0.1	0.1	0.1	0.1	0.1	0.1	0.1	0.1	0.1	0.1	0.1	0.1	0.1	0.1	0.1	0.1	0.1	0.1	0.1	0.1	0.1	0.1	0.1	0.1
272	0.1	0.1	0.1	0.1	0.1	0.1	0.1	0.1	0.1	0.1	0.1	0.1	0.1	0.1	0.1	0.1	0.1	0.1	0.1	0.1	0.1	0.1	0.1	0.1	0.1	0.1	0.1	0.1	0.1	0.1	0.1	0.1	0.1	0.1	0.1	0.1	0.1	0.1	0.1	0.1	0.1	0.1	0.1	0.1	0.1	0.1	0.1	0.1	0.1
13	0.1	0.1	0.1	0.1	0.1	0.1	0.1	0.1	0.1	0.1	0.1	0.1	0.1	0.1	0.1	0.1	0.1	0.1	0.1	0.1	0.1	0.1	0.1	0.1	0.1	0.1	0.1	0.1	0.1	0.1	0.1	0.1	0.1	0.1	0.1	0.1	0.1	0.1	0.1	0.1	0.1	0.1	0.1	0.1	0.1	0.1	0.1	0.1	0.1
86	0.1	0.1	0.1	0.1	0.1	0.1	0.1	0.1	0.1	0.1	0.1	0.1	0.1	0.1	0.1	0.1	0.1	0.1	0.1	0.1	0.1	0.1	0.1	0.1	0.1	0.1	0.1	0.1	0.1	0.1	0.1	0.1	0.1	0.1	0.1	0.1	0.1	0.1	0.1	0.1	0.1	0.1	0.1	0.1	0.1	0.1	0.1	0.1	0.1
1963	0.1	0.1	0.1	0.1	0.1	0.1	0.1	0.1	0.1	0.1	0.1	0.1	0.1	0.1	0.1	0.1	0.1	0.1	0.1	0.1	0.1	0.1	0.1	0.1	0.1	0.1	0.1	0.1	0.1	0.1	0.1	0.1	0.1	0.1	0.1	0.1	0.1	0.1	0.1	0.1	0.1	0.1	0.1	0.1	0.1	0.1	0.1	0.1	0.1
2025	0.1	0.1	0.1	0.1	0.1	0.1	0.1	0.1	0.1	0.1	0.1	0.1	0.1	0.1	0.1	0.1	0.1	0.1	0.1	0.1	0.1	0.1	0.1	0.1	0.1	0.1	0.1	0.1	0.1	0.1	0.1	0.1	0.1	0.1	0.1	0.1	0.1	0.1	0.1	0.1	0.1	0.1	0.1	0.1	0.1	0.1	0.1	0.1	0.1
2073	0.1	0.1	0.1	0.1	0.1	0.1	0.1	0.1	0.1	0.1	0.1	0.1	0.1	0.1	0.1	0.1	0.1	0.1	0.1	0.1	0.1	0.1	0.1	0.1	0.1	0.1	0.1	0.1	0.1	0.1	0.1	0.1	0.1	0.1	0.1	0.1	0.1	0.1	0.1	0.1	0.1	0.1	0.1	0.1	0.1	0.1	0.1	0.1	0.1
2009	0.1	0.1	0.1	0.1	0.1	0.1	0.1	0.1	0.1	0.1	0.1	0.1	0.1	0.1	0.1	0.1	0.1	0.1	0.1	0.1	0.1	0.1	0.1	0.1	0.1	0.1	0.1	0.1	0.1	0.1	0.1	0.1	0.1	0.1	0.1	0.1	0.1	0.1	0.1	0.1	0.1	0.1	0.1	0.1	0.1	0.1	0.1	0.1	0.1
3007	0.1	0.1	0.1	0.1	0.1	0.1	0.1	0.1	0.1	0.1	0.1	0.1	0.1	0.1	0.1	0.1	0.1	0.1	0.1	0.1	0.1	0.1	0.1	0.1	0.1	0.1	0.1	0.1	0.1	0.1	0.1	0.1	0.1	0.1	0.1	0.1	0.1	0.1	0.1	0.1	0.1	0.1	0.1	0.1	0.1	0.1	0.1	0.1	0.1
3006	0.1	0.1	0.1	0.1	0.1	0.1	0.1	0.1	0.1	0.1	0.1	0.1	0.1	0.1	0.1	0.1	0.1	0.1	0.1	0.1	0.1	0.1	0.1	0.1	0.1	0.1	0.1	0.1	0.1	0.1	0.1	0.1	0.1	0.1	0.1	0.1	0.1	0.1	0.1	0.1	0.1	0.1	0.1	0.1	0.1	0.1	0.1	0.1	0.1
2038	0.1	0.1	0.1	0.1	0.1	0.1	0.1	0.1	0.1	0.1	0.1	0.1	0.1	0.1	0.1	0.1	0.1	0.1	0.1	0.1	0.1	0.1	0.1	0.1	0.1	0.1	0.1	0.1	0.1	0.1	0.1	0.1	0.1	0.1	0.1	0.1	0.1	0.1	0.1	0.1	0.1	0.1	0.1	0.1	0.1	0.1	0.1	0.1	0.1
210	0.1	0.1	0.1	0.1	0.1	0.1	0.1	0.1	0.1	0.1	0.1	0.1	0.1	0.1	0.1	0.1	0.1	0.1	0.1	0.1	0.1	0.1	0.1	0.1	0.1	0.1	0.1	0.1	0.1	0.1	0.1	0.1	0.1	0.1	0.1	0.1	0.1	0.1	0.1	0.1	0.1	0.1	0.1	0.1	0.1	0.1	0.1	0.1	0.1
49	0.1	0.1	0.1	0.1	0.1	0.1	0.1	0.1	0.1	0.1	0.1	0.1	0.1	0.1	0.1	0.1	0.1	0.1	0.1	0.1	0.1	0.1	0.1	0.1	0.1	0.1	0.1	0.1	0.1	0.1	0.1	0.1	0.1	0.1	0.1	0.1	0.1	0.1	0.1	0.1	0.1	0.1	0.1	0.1	0.1	0.1	0.1	0.1	0.1
207	0.1	0.1	0.1	0.1	0.1	0.1	0.1	0.1	0.1	0.1	0.1	0.1	0.1	0.1	0.1	0.1	0.1	0.1	0.1	0.1	0.1	0.1	0.1	0.1	0.1	0.1	0.1	0.1	0.1	0.1	0.1	0.1	0.1	0.1	0.1	0.1	0.1	0.1	0.1	0.1	0.1	0.1	0.1	0.1	0.1	0.1	0.1	0.1	0.1
5270	0.1	0.1	0.1	0.1	0.1	0.1	0.1	0.1	0.1	0.1	0.1	0.1	0.1	0.1	0.1	0.1	0.1	0.1	0.1	0.1	0.1	0.1	0.1	0.1	0.1	0.1	0.1	0.1	0.1	0.1	0.1	0.1	0.1	0.1	0.1	0.1	0.1	0.1	0.1	0.1	0.1	0.1	0.1	0.1	0.1	0.1	0.1	0.1	0.1
5296	0.1	0.1	0.1	0.1	0.1	0.1	0.1	0.1	0.1	0.1	0.1	0.1	0.1	0.1	0.1	0.1	0.1	0.1	0.1	0.1	0.1	0.1	0.1	0.1	0.1	0.1	0.1	0.1	0.1	0.1	0.1	0.1	0.1	0.1	0.1	0.1	0.1	0.1	0.1	0.1	0.1	0.1	0.1	0.1	0.1	0.1	0.1	0.1	0.1
1889	0.1	0.1	0.1	0.1	0.1	0.1	0.1	0.1	0.1	0.1	0.1	0.1	0.1	0.1	0.1	0.1	0.1	0.1	0.1	0.1	0.1	0.1	0.1	0.1	0.1	0.1	0.1	0.1	0.1	0.1	0.1	0.1	0.1	0.1	0.1	0.1	0.1	0.1	0.1	0.1	0.1	0.1	0.1	0.1	0.1	0.1	0.1	0.1	0.1
179	0.1	0.1	0.1	0.1	0.1	0.1	0.1	0.1	0.1	0.1	0.1	0.1	0.1	0.1	0.1	0.1	0.1	0.1	0.1	0.1	0.1	0.1	0.1	0.1	0.1	0.1	0.1	0.1	0.1	0.1	0.1	0.1	0.1	0.1	0.1	0.1	0.1	0.1	0.1	0.1	0.1	0.1	0.1	0.1	0.1	0.1	0.1	0.1	0.1
87	0.1	0.1	0.1	0.1	0.1	0.1	0.1	0.1	0.1	0.1	0.1	0.1	0.1	0.1	0.1	0.1	0.1	0.1	0.1	0.1	0.1	0.1	0.1	0.1	0.1	0.1	0.1	0.1	0.1	0.1	0.1	0.1	0.1	0.1	0.1	0.1	0.1	0.1	0.1	0.1	0.1	0.1	0.1	0.1	0.1	0.1	0.1	0.1	0.1
4114	0.1	0.1	0.1	0.1	0.1	0.1	0.1	0.1	0.1	0.1	0.1	0.1	0.1	0.1	0.1	0.1	0.1	0.1	0.1	0.1	0.1	0.1	0.1	0.1	0.1	0.1	0.1	0.1	0.1	0.1	0.1	0.1	0.1	0.1	0.1	0.1	0.1	0.1	0.1	0.1	0.1	0.1	0.1	0.1	0.1	0.1	0.1	0.1	0.1
99	0.1	0.1	0.1	0.1	0.1	0.1	0.1	0.1	0.1	0.1	0.1	0.1	0.1	0.1	0.1	0.1	0.1	0.1	0.1	0.1	0.1	0.1	0.1	0.1	0.1	0.1	0.1	0.1	0.1	0.1	0.1	0.1	0.1	0.1	0.1	0.1	0.1	0.1	0.1	0.1	0.1	0.1	0.1	0.1	0.1	0.1	0.1	0.1	0.1
48	0.1	0.1	0.1	0.1	0.1	0.1	0.1	0.1	0.1	0.1	0.1	0.1	0.1	0.1	0.1	0.1	0.1	0.1	0.1	0.1	0.1	0.1	0.1	0.1	0.1	0.1	0.1	0.1	0.1	0.1	0.1	0.1	0.1	0.1	0.1	0.1	0.1	0.1	0.1	0.1	0.1	0.1	0.1	0.1	0.1	0.1	0.1	0.1	0.1
182	0.1	0.1	0.1	0.1	0.1	0.1	0.1	0.1	0.1	0.1	0.1	0.1	0.1	0.1	0.1	0.1	0.1	0.1	0.1	0.1	0.1	0.1	0.1	0.1	0.1	0.1	0.1	0.1	0.1	0.1	0.1	0.1	0.1	0.1	0.1	0.1	0.1	0.1	0.1	0.1	0.1	0.1	0.1	0.1	0.1	0.1	0.1	0.1	0.1
5536	0.1	0.1	0.1	0.1	0.1	0.1	0.1	0.1	0.1	0.1	0.1	0.1	0.1	0.1	0.1	0.1	0.1	0.1	0.1	0.1	0.1	0.1	0.1	0.1	0.1	0.1	0.1	0.1	0.1	0.1	0.1	0.1	0.1	0.1	0.1	0.1	0.1	0.1	0.1	0.1	0.1	0.1	0.1	0.1	0.1	0.1	0.1	0.1	0.1
74	0.1	0.1	0.1	0.1	0.1	0.1	0.1	0.1	0.1	0.1	0.1	0.1	0.1	0.1	0.1	0.1	0.1	0.1	0.1	0.1	0.1	0.1	0.1	0.1	0.1	0.1	0.1	0.1	0.1	0.1	0.1	0.1	0.1	0.1	0.1	0.1	0.1	0.1	0.1	0.1	0.1	0.1	0.1	0.1	0.1	0.1	0.1	0.1	0.1
34	0.1	0.1	0.1	0.1	0.1	0.1	0.1	0.1	0.1	0.1	0.1	0.1	0.1	0.1	0.1	0.1	0.1	0.1	0.1	0.1	0.1	0.1	0.1	0.1	0.1	0.1	0.1	0.1	0.1	0.1	0.1	0.1	0.1	0.1	0.1	0.1	0.1	0.1	0.1	0.1	0.1	0.1	0.1	0.1	0.1	0.1	0.1	0.1	0.1
29	0.1	0.1	0.1	0.1	0.1	0.1	0.1	0.1	0.1	0.1	0.1	0.1	0.1	0.1	0.1	0.1	0.1	0.1	0.1	0.1	0.1	0.1	0.1	0.1	0.1	0.1	0.1	0.1	0.1	0.1	0.1	0.1	0.1	0.1	0.1	0.1	0.1	0.1	0.1	0.1	0.1	0.1	0.1	0.1	0.1	0.1	0.1	0.1	0.1
117	0.1	0.1	0.1	0.1	0.1	0.1	0.1	0.1	0.1	0.1	0.1	0.1	0.1	0.1	0.1	0.1	0.1	0.1	0.1	0.1	0.1	0.1	0.1	0.1	0.1	0.1	0.1	0.1	0.1	0.1	0.1	0.1	0.1	0.1	0.1	0.1	0.1	0.1	0.1	0.1	0.1	0.1	0.1	0.1	0.1	0.1	0.1	0.1	0.1
2510	0.1	0.1	0.1	0.1	0.1	0.1	0.1	0.1	0.1	0.1	0.1	0.1	0.1	0.1	0.1	0.1	0.1	0.1	0.1	0.1	0.1	0.1	0.1	0.1	0.1	0.1	0.1	0.1	0.1	0.1	0.1	0.1	0.1	0.1	0.1	0.1	0.1	0.1	0.1	0.1	0.1	0.1	0.1	0.1	0.1	0.1	0.1	0.1	0.1
110	0.1	0.1	0.1	0.1	0.1	0.1	0.1	0.1	0.1	0.1	0.1	0.1	0.1	0.1	0.1	0.1	0.1	0.1	0.1	0.1	0.1	0.1	0.1	0.1	0.1	0.1	0.1	0.1	0.1	0.1	0.1	0.1	0.1	0.1	0.1	0.1	0.1	0.1	0.1	0.1	0.1	0.1	0.1	0.1	0.1	0.1	0.1	0.1	0.1
116	0.1	0.1	0.1	0.1	0.1	0.1	0.1	0.1	0.1	0.1	0.1	0.1	0.1	0.1	0.1	0.1	0.1	0.1	0.1	0.1	0.1	0.1	0.1	0.1	0.1	0.1	0.1	0.1	0.1	0.1	0.1	0.1	0.1	0.1	0.1	0.1	0.1	0.1	0.1	0.1	0.1	0.1	0.1	0.1	0.1	0.1	0.1	0.1	0.1
59	0.1	0.1	0.1	0.1	0.1	0.1	0.1	0.1	0.1	0.1	0.1	0.1	0.1	0.1	0.1	0.1	0.1	0.1	0.1	0.1	0.1	0.1	0.1	0.1	0.1	0.1	0.1	0.1	0.1	0.1	0.1	0.1	0.1	0.1	0.1	0.1	0.1	0.1	0.1	0.1	0.1	0.1	0.1	0.1	0.1	0.1	0.1	0.1	0.1
63	0.1	0.1	0.1	0.1	0.1	0.1	0.1	0.1	0.1	0.1	0.1	0.1	0.1	0.1	0.1	0.1	0.1	0.1	0.1	0.1	0.1	0.1	0.1	0.1	0.1	0.1	0.1	0.1	0.1	0.1	0.1	0.1	0.1	0.1	0.1	0.1	0.1	0.1	0.1	0.1	0.1	0.1	0.1	0.1	0.1	0.1	0.1	0.1	0.1
40	0.1	0.1	0.1	0.1	0.1	0.1	0.1	0.1	0.1	0.1	0.1	0.1	0.1	0.1	0.1	0.1	0.1	0.1	0.1	0.1	0.1	0.1	0.1	0.1	0.1	0.1	0.1	0.1	0.1	0.1	0.1	0.1	0.1	0.1	0.1	0.1	0.1	0.1	0.1	0.1	0.1	0.1	0.1	0.1	0.1	0.1	0.1	0.1	0.1
62	0.1	0.1	0.1	0.1	0.1	0.1	0.1	0.1	0.1	0.1	0.1	0.1	0.1	0.1	0.1	0.1	0.1	0.1	0.1	0.1	0.1	0.1	0.1	0.1	0.1	0.1	0.1	0.1	0.1	0.1	0.1	0.1	0.1	0.1	0.1	0.1	0.1	0.1	0.1	0.1	0.1	0.1	0.1	0.1	0.1	0.1	0.1	0.1	0.1
2374	0.1	0.1	0.1	0.1	0.1	0.1	0.1	0.1	0.1	0.1	0.1	0.1	0.1	0.1	0.1	0.1	0.1	0.1	0.1	0.1	0.1	0.1	0.1	0.1	0.1	0.1	0.1	0.1	0.1	0.1	0.1	0.1	0.1	0.1	0.1	0.1	0.1	0.1	0.1	0.1	0.1	0.1	0.1	0.1	0.1	0.1	0.1	0.1	0.1
2384	0.1	0.1	0.1	0.1	0.1	0.1	0.1	0.1	0.1	0.1	0.1	0.1	0.1	0.1	0.1	0.1	0.1	0.1	0.1	0.1	0.1	0.1	0.1	0.1	0.1	0.1	0.1	0.1	0.1	0.1	0.1	0.1	0.1	0.1	0.1	0.1	0.1	0.1	0.1	0.1	0.1	0.1	0.1	0.1	0.1	0.1	0.1	0.1	0.1
89	0.1	0.1	0.1	0.1	0.1	0.1	0.1	0.1	0.1	0.1	0.1	0.1	0.1	0.1	0.1	0.1	0.1	0.1	0.1	0.1	0.1	0.1	0.1	0.1	0.1	0.1	0.1	0.1	0.1	0.1	0.1	0.1	0.1	0.1	0.1	0.1	0.1	0.1	0.1	0.1	0.1	0.1	0.1	0.1	0.1	0.1	0.1	0.1	0.1
202	0.1	0.1	0.1	0.1	0.1	0.1	0.1	0.1	0.1	0.1	0.1	0.1	0.1	0.1	0.1	0.1	0.1	0.1	0.1	0.1	0.1	0.1	0.1	0.1	0.1	0.1	0.1	0.1	0.1	0.1	0.1	0.1	0.1	0.1	0.1	0.1	0.1	0.1	0.1	0.1	0.1	0.1	0.1	0.1	0.1	0.1	0.1	0.1	0.1
2256	0.1	0.1	0.1	0.1	0.1	0.1	0.1	0.1	0.1	0.1	0.1	0.1	0.1	0.1	0.1	0.1	0.1	0.1	0.1	0.1	0.1	0.1	0.1	76.6322	0.1	0.1	0.1	0.1	0.1	0.1	0.1	0.1	0.1	0.1	0.1	0.1	0.1	0.1	0.1	0.1	0.1	0.1	0.1	0.1	0.1	0.1	0.1	0.1	0.1
5451	0.1	0.1	0.1	0.1	0.1	0.1	0.1	0.1	0.1	0.1	0.1	0.1	0.1	0.1	0.1	0.1	0.1	0.1	0.1	0.1	0.1	0.1	0.1	0.1	0.1	0.1	0.1	0.1	0.1	0.1	0.1	0.1	0.1	0.1	0.1	0.1	0.1	0.1	0.1	0.1	0.1	0.1	0.1	0.1	0.1	0.1	0.1	0.1	0.1
211	0.1	0.1	0.1	0.1	0.1	0.1	0.1	0.1	0.1	0.1	0.1	0.1	0.1	0.1	0.1	0.1	0.1	0.1	0.1	0.1	0.1	0.1	0.1	0.1	0.1	0.1	0.1	0.1	0.1	0.1	0.1	0.1	0.1	0.1	0.1	0.1	0.1	0.1	0.1	0.1	0.1	0.1	0.1	0.1	0.1	0.1	0.1	0.1	0.1
60	0.1	0.1	0.1	0.1	0.1	0.1	0.1	0.1	0.1	0.1	0.1	0.1	0.1	0.1	0.1	0.1	0.1	0.1	0.1	0.1	0.1	0.1	0.1	0.1	0.1	0.1	0.1	0.1	0.1	0.1	0.1	0.1	0.1	0.1	0.1	0.1	0.1	0.1	0.1	0.1	0.1	0.1	0.1	0.1	0.1	0.1	0.1	0.1	0.1
73	0.1	0.1	0.1	0.1	0.1	0.1	0.1	0.1	0.1	0.1	0.1	0.1	0.1	0.1	0.1	0.1	0.1	0.1	0.1	0.1	0.1	0.1	0.1	0.1	0.1	0.1	0.1	0.1	0.1	0.1	0.1	0.1	0.1	0.1	0.1	0.1	0.1	0.1	0.1	0.1	0.1	0.1	0.1	0.1	0.1	0.1	0.1	0.1	0.1
2430	0.1	0.1	0.1	0.1	0.1	0.1	0.1	0.1	0.1	0.1	0.1	0.1	0.1	0.1	0.1	0.1	0.1	0.1	0.1	0.1	0.1	0.1	0.1	0.1	0.1	0.1	0.1	0.1	0.1	0.1	0.1	0.1	0.1	0.1	0.1	0.1	0.1	0.1	0.1	0.1	0.1	0.1	0.1	0.1	0.1	0.1	0.1	0.1	0.1
2375	0.1	0.1	0.1	0.1	0.1	0.1	0.1	0.1	0.1	0.1	0.1	0.1	0.1	0.1	0.1	0.1	0.1	0.1	0.1	0.1	0.1	0.1	0.1	0.1	0.1	0.1	0.1	0.1	0.1	0.1	0.1	0.1	0.1	0.1	0.1	0.1	0.1	0.1	0.1	0.1	0.1	0.1	0.1	0.1	0.1	0.1	0.1	0.1	0.1
2416	0.1	0.1	0.1	0.1	0.1	0.1	0.1	0.1	0.1	0.1	0.1	0.1	0.1	0.1	0.1	0.1	0.1	0.1	0.1	0.1	0.1	0.1	0.1	0.1	0.1	0.1	0.1	0.1	0.1	0.1	0.1	0.1	0.1	0.1	0.1	0.1	0.1	0.1	0.1	0.1	0.1	0.1	0.1	0.1	0.1	0.1	0.1	0.1	0.1
2431	0.1	0.1	0.1	0.1	0.1	0.1	0.1	0.1	0.1	0.1	0.1	0.1	0.1	0.1	0.1	0.1	0.1	0.1	0.1	0.1	0.1	0.1	0.1	0.1	0.1	0.1	0.1	0.1	0.1	0.1	0.1	0.1	0.1	0.1	0.1	0.1	0.1	0.1	0.1	0.1	0.1	0.1	0.1	0.1	0.1	0.1	0.1	0.1	0.1
37	0.1	0.1	0.1	0.1	0.1	0.1	0.1	0.1	0.1	0.1	0.1	0.1	0.1	0.1	0.1	0.1	0.1	0.1	0.1	0.1	0.1	0.1	0.1	0.1	0.1	0.1	0.1	0.1	0.1	0.1	0.1	0.1	0.1	0.1	0.1	0.1	0.1	0.1	0.1	0.1	0.1	0.1	0.1	0.1	0.1	0.1	0.1	0.1	0.1
113	0.1	0.1	0.1	0.1	0.1	0.1	0.1	0.1	0.1	0.1	0.1	0.1	0.1	0.1	0.1	0.1	0.1	0.1	0.1	0.1	0.1	0.1	0.1	0.1	0.1	0.1	0.1	0.1	0.1	0.1	0.1	0.1	0.1	0.1	0.1	0.1	0.1	0.1	0.1	0.1	0.1	0.1	0.1	0.1	0.1	0.1	0.1	0.1	0.1
2192	0.1	0.1	0.1	0.1	0.1	0.1	0.1	0.1	0.1	0.1	0.1	0.1	0.1	0.1	0.1	0.1	0.1	0.1	0.1	0.1	0.1	0.1	0.1	0.1	0.1	0.1	0.1	0.1	0.1	0.1	0.1	0.1	0.1	0.1	0.1	0.1	0.1	0.1	0.1	0.1	0.1	0.1	0.1	0.1	0.1	0.1	0.1	0.1	0.1
3557	0.1	0.1	0.1	0.1	0.1	0.1	0.1	0.1	0.1	0.1	0.1	0.1	0.1	0.1	0.1	0.1	0.1	0.1	0.1	0.1	0.1	0.1	0.1	0.1	0.1	0.1	0.1	0.1	0.1	0.1	0.1	0.1	0.1	0.1	0.1	0.1	0.1	0.1	0.1	0.1	0.1	0.1	0.1	0.1	0.1	0.1	0.1	0.1	0.1
2387	0.1	0.1	0.1	0.1	0.1	0.1	0.1	0.1	0.1	0.1	0.1	0.1	0.1	0.1	0.1	0.1	0.1	0.1	0.1	0.1	0.1	0.1	0.1	0.1	0.1	0.1	0.1	0.1	0.1	0.1	0.1	0.1	0.1	0.1	0.1	0.1	0.1	0.1	0.1	0.1	0.1	0.1	0.1	0.1	0.1	0.1	0.1	0.1	0.1
2450	0.1	0.1	0.1	0.1	0.1	0.1	0.1	0.1	0.1	0.1	0.1	0.1	0.1	0.1	0.1	0.1	0.1	0.1	0.1	0.1	0.1	0.1	0.1	0.1	0.1	0.1	0.1	0.1	0.1	0.1	0.1	0.1	0.1	0.1	0.1	0.1	0.1	0.1	0.1	0.1	0.1	0.1	0.1	0.1	0.1	0.1	0.1	0.1	0.1
36	0.1	0.1	0.1	0.1	0.1	0.1	0.1	0.1	0.1	0.1	0.1	0.1	0.1	0.1	0.1	0.1	0.1	0.1	0.1	0.1	0.1	0.1	0.1	0.1	0.1	0.1	0.1	0.1	0.1	0.1	0.1	0.1	0.1	0.1	0.1	0.1	0.1	0.1	0.1	0.1	0.1	0.1	0.1	0.1	0.1	0.1	0.1	0.1	0.1
75	0.1	0.1	0.1	0.1	0.1	0.1	0.1	0.1	0.1	0.1	0.1	0.1	0.1	0.1	0.1	0.1	0.1	0.1	0.1	0.1	0.1	0.1	0.1	0.1	0.1	0.1	0.1	0.1	0.1	0.1	0.1	0.1	0.1	0.1	0.1	0.1	0.1	0.1	0.1	0.1	0.1	0.1	0.1	0.1	0.1	0.1	0.1	0.1	0.1
97	0.1	0.1	0.1	0.1	0.1	0.1	0.1	0.1	0.1	0.1	0.1	0.1	0.1	0.1	0.1	0.1	0.1	0.1	0.1	0.1	0.1	0.1	0.1	0.1	0.1	0.1	0.1	0.1	0.1	0.1	0.1	0.1	0.1	0.1	0.1	0.1	0.1	0.1	0.1	0.1	0.1	0.1	0.1	0.1	0.1	0.1	0.1	0.1	0.1
254	0.1	0.1	0.1	0.1	0.1	0.1	0.1	0.1	0.1	0.1	0.1	0.1	0.1	0.1	0.1	0.1	0.1	0.1	0.1	0.1	0.1	0.1	0.1	0.1	0.1	0.1	0.1	0.1	0.1	0.1	0.1	0.1	0.1	0.1	0.1	0.1	0.1	0.1	0.1	0.1	0.1	0.1	0.1	0.1	0.1	0.1	0.1	0.1	0.1
203	0.1	0.1	0.1	0.1	0.1	0.1	0.1	0.1	0.1	0.1	0.1	0.1	0.1	0.1	0.1	0.1	0.1	0.1	0.1	0.1	0.1	0.1	0.1	0.1	0.1	0.1	0.1	0.1	0.1	0.1	0.1	0.1	0.1	0.1	0.1	0.1	0.1	0.1	0.1	0.1	0.1	0.1	0.1	0.1	0.1	0.1	0.1	0.1	0.1
195	0.1	0.1	0.1	0.1	0.1	0.1	0.1	0.1	0.1	0.1	0.1	0.1	0.1	0.1	0.1	0.1	0.1	0.1	0.1	0.1	0.1	0.1	0.1	0.1	0.1	0.1	0.1	0.1	0.1	0.1	0.1	0.1	0.1	0.1	0.1	0.1	0.1	0.1	0.1	0.1	0.1	0.1	0.1	0.1	0.1	0.1	0.1	0.1	0.1
189	0.1	0.1	0.1	0.1	0.1	0.1	0.1	0.1	0.1	0.1	0.1	0.1	0.1	0.1	0.1	0.1	0.1	0.1	0.1	0.1	0.1	0.1	0.1	0.1	0.1	0.1	0.1	0.1	0.1	0.1	0.1	0.1	0.1	0.1	0.1	0.1	0.1	0.1	0.1	0.1	0.1	0.1	0.1	0.1	0.1	0.1	0.1	0.1	0.1
71	0.1	0.1	0.1	0.1	0.1	0.1	0.1	0.1	0.1	0.1	0.1	0.1	0.1	0.1	0.1	0.1	0.1	0.1	0.1	0.1	0.1	0.1	0.1	0.1	0.1	0.1	0.1	0.1	0.1	0.1	0.1	0.1	0.1	0.1	0.1	0.1	0.1	0.1	0.1	0.1	0.1	0.1	0.1	0.1	0.1	0.1	0.1	0.1	0.1
77	0.1	0.1	0.1	0.1	0.1	0.1	0.1	0.1	0.1	0.1	0.1	0.1	0.1	0.1	0.1	0.1	0.1	0.1	0.1	0.1	0.1	0.1	0.1	0.1	0.1	0.1	0.1	0.1	0.1	0.1	0.1	0.1	0.1	0.1	0.1	0.1	0.1	0.1	0.1	0.1	0.1	0.1	0.1	0.1	0.1	0.1	0.1	0.1	0.1
72	0.1	0.1	0.1	0.1	0.1	0.1	0.1	0.1	0.1	0.1	0.1	0.1	0.1	0.1	0.1	0.1	0.1	0.1	0.1	0.1	0.1	0.1	0.1	0.1	0.1	0.1	0.1	0.1	0.1	0.1	0.1	0.1	0.1	0.1	0.1	0.1	0.1	0.1	0.1	0.1	0.1	0.1	0.1	0.1	0.1	0.1	0.1	0.1	0.1
78	0.1	0.1	0.1	0.1	0.1	0.1	0.1	0.1	0.1	0.1	0.1	0.1	0.1	0.1	0.1	0.1	0.1	0.1	0.1	0.1	0.1	0.1	0.1	0.1	0.1	0.1	0.1	0.1	0.1	0.1	0.1	0.1	0.1	0.1	0.1	0.1	0.1	0.1	0.1	0.1	0.1	0.1	0.1	0.1	0.1	0.1	0.1	0.1	0.1
177	0.1	0.1	0.1	0.1	0.1	0.1	0.1	0.1	0.1	0.1	0.1	0.1	0.1	0.1	0.1	0.1	0.1	0.1	0.1	0.1	0.1	0.1	0.1	0.1	0.1	0.1	0.1	0.1	0.1	0.1	0.1	0.1	0.1	0.1	0.1	0.1	0.1	0.1	0.1	0.1	0.1	0.1	0.1	0.1	0.1	0.1	0.1	0.1	0.1
209	0.1	0.1	0.1	0.1	0.1	0.1	0.1	0.1	0.1	0.1	0.1	0.1	0.1	0.1	0.1	0.1	0.1	0.1	0.1	0.1	0.1	0.1	0.1	0.1	0.1	0.1	0.1	0.1	0.1	0.1	0.1	0.1	0.1	0.1	0.1	0.1	0.1	0.1	0.1	0.1	0.1	0.1	0.1	0.1	0.1	0.1	0.1	0.1	0.1
176	0.1	0.1	0.1	0.1	0.1	0.1	0.1	0.1	0.1	0.1	0.1	0.1	0.1	0.1	0.1	0.1	0.1	0.1	0.1	0.1	0.1	0.1	0.1	0.1	0.1	0.1	0.1	0.1	0.1	0.1	0.1	0.1	0.1	0.1	0.1	0.1	0.1	0.1	0.1	0.1	0.1	0.1	0.1	0.1	0.1	0.1	0.1	0.1	0.1
214	0.1	0.1	0.1	0.1	0.1	0.1	0.1	0.1	0.1	0.1	0.1	0.1	0.1	0.1	0.1	0.1	0.1	0.1	0.1	0.1	0.1	0.1	0.1	0.1	0.1	0.1	0.1	0.1	0.1	0.1	0.1	0.1	0.1	0.1	0.1	0.1	0.1	0.1	0.1	0.1	0.1	0.1	0.1	0.1	0.1	0.1	0.1	0.1	0.1
206	0.1	0.1	0.1	0.1	0.1	0.1	0.1	0.1	0.1	0.1	0.1	0.1	0.1	0.1	0.1	0.1	0.1	0.1	0.1	0.1	0.1	0.1	0.1	0.1	0.1	0.1	0.1	0.1	0.1	0.1	0.1	0.1	0.1	0.1	0.1	0.1	0.1	0.1	0.1	0.1	0.1	0.1	0.1	0.1	0.1	0.1	0.1	0.1	0.1
18	0.1	0.1	0.1	0.1	0.1	0.1	0.1	0.1	0.1	0.1	0.1	0.1	0.1	0.1	0.1	0.1	0.1	0.1	0.1	0.1	0.1	0.1	0.1	0.1	0.1	0.1	0.1	0.1	0.1	0.1	0.1	0.1	0.1	0.1	0.1	0.1	0.1	0.1	0.1	0.1	0.1	0.1	0.1	0.1	0.1	0.1	0.1	0.1	0.1
158	0.1	0.1	0.1	0.1	0.1	0.1	0.1	0.1	0.1	0.1	0.1	0.1	0.1	0.1	0.1	0.1	0.1	0.1	0.1	0.1	0.1	0.1	0.1	0.1	0.1	0.1	0.1	0.1	0.1	0.1	0.1	0.1	0.1	0.1	0.1	0.1	0.1	0.1	0.1	0.1	0.1	0.1	0.1	0.1	0.1	0.1	0.1	0.1	0.1
25	0.1	0.1	0.1	0.1	0.1	0.1	0.1	0.1	0.1	0.1	0.1	0.1	0.1	0.1	0.1	0.1	0.1	0.1	0.1	0.1	0.1	0.1	0.1	0.1	0.1	0.1	0.1	0.1	0.1	0.1	0.1	0.1	0.1	0.1	0.1	0.1	0.1	0.1	0.1	0.1	0.1	0.1	0.1	0.1	0.1	0.1	0.1	0.1	0.1
168	0.1	0.1	0.1	0.1	0.1	0.1	0.1	0.1	0.1	0.1	0.1	0.1	0.1	0.1	0.1	0.1	0.1	0.1	0.1	0.1	0.1	0.1	0.1	0.1	0.1	0.1	0.1	0.1	0.1	0.1	0.1	0.1	0.1	0.1	0.1	0.1	0.1	0.1	0.1	0.1	0.1	0.1	0.1	0.1	0.1	0.1	0.1	0.1	0.1
314	0.1	0.1	0.1	0.1	0.1	0.1	0.1	0.1	0.1	0.1	0.1	0.1	0.1	0.1	0.1	0.1	0.1	0.1	0.1	0.1	0.1	0.1	0.1	0.1	0.1	0.1	0.1	0.1	0.1	0.1	0.1	0.1	0.1	0.1	0.1	0.1	0.1	0.1	0.1	0.1	0.1	0.1	0.1	0.1	0.1	0.1	0.1	0.1	0.1
305	0.1	0.1	0.1	0.1	0.1	0.1	0.1	0.1	0.1	0.1	0.1	0.1	0.1	0.1	0.1	0.1	0.1	0.1	0.1	0.1	0.1	0.1	0.1	0.1	0.1	0.1	0.1	0.1	0.1	0.1	0.1	0.1	0.1	0.1	0.1	0.1	0.1	0.1	0.1	0.1	0.1	0.1	0.1	0.1	0.1	0.1	0.1	0.1	0.1
386	0.1	0.1	0.1	0.1	0.1	0.1	0.1	0.1	0.1	0.1	0.1	0.1	0.1	0.1	0.1	0.1	0.1	0.1	0.1	0.1	0.1	0.1	0.1	0.1	0.1	0.1	0.1	0.1	0.1	0.1	0.1	0.1	0.1	0.1	0.1	0.1	0.1	0.1	0.1	0.1	0.1	0.1	0.1	0.1	0.1	0.1	0.1	0.1	0.1
2194	0.1	0.1	0.1	0.1	0.1	0.1	0.1	0.1	0.1	0.1	0.1	0.1	0.1	0.1	0.1	0.1	0.1	0.1	0.1	0.1	0.1	0.1	0.1	0.1	0.1	0.1	0.1	0.1	0.1	0.1	0.1	0.1	0.1	0.1	0.1	0.1	0.1	0.1	0.1	0.1	0.1	0.1	0.1	0.1	0.1	0.1	0.1	0.1	0.1
3253	0.1	0.1	0.1	0.1	0.1	0.1	0.1	0.1	0.1	0.1	0.1	0.1	0.1	0.1	0.1	0.1	0.1	0.1	0.1	0.1	0.1	0.1	0.1	0.1	0.1	0.1	0.1	0.1	0.1	0.1	0.1	0.1	0.1	0.1	0.1	0.1	0.1	0.1	0.1	0.1	0.1	0.1	0.1	0.1	0.1	0.1	0.1	0.1	0.1
3270	0.1	0.1	0.1	0.1	0.1	0.1	0.1	0.1	0.1	0.1	0.1	0.1	0.1	0.1	0.1	0.1	0.1	0.1	0.1	0.1	0.1	0.1	0.1	0.1	0.1	0.1	0.1	0.1	0.1	0.1	0.1	0.1	0.1	0.1	0.1	0.1	0.1	0.1	0.1	0.1	0.1	0.1	0.1	0.1	0.1	0.1	0.1	0.1	0.1
160	0.1	0.1	0.1	0.1	0.1	0.1	0.1	0.1	0.1	0.1	0.1	0.1	0.1	0.1	0.1	0.1	0.1	0.1	0.1	0.1	0.1	0.1	0.1	0.1	0.1	0.1	0.1	0.1	0.1	0.1	0.1	0.1	0.1	0.1	0.1	0.1	0.1	0.1	0.1	0.1	0.1	0.1	0.1	0.1	0.1	0.1	0.1	0.1	0.1
167	0.1	0.1	0.1	0.1	0.1	0.1	0.1	0.1	0.1	0.1	0.1	0.1	0.1	0.1	0.1	0.1	0.1	0.1	0.1	0.1	0.1	0.1	0.1	0.1	0.1	0.1	0.1	0.1	0.1	0.1	0.1	0.1	0.1	0.1	0.1	0.1	0.1	0.1	0.1	0.1	0.1	0.1	0.1	0.1	0.1	0.1	0.1	0.1	0.1
163	0.1	0.1	0.1	0.1	0.1	0.1	0.1	0.1	0.1	0.1	0.1	0.1	0.1	0.1	0.1	0.1	0.1	0.1	0.1	0.1	0.1	0.1	0.1	0.1	0.1	0.1	0.1	0.1	0.1	0.1	0.1	0.1	0.1	0.1	0.1	0.1	0.1	0.1	0.1	0.1	0.1	0.1	0.1	0.1	0.1	0.1	0.1	0.1	0.1
3913	0.1	0.1	0.1	0.1	0.1	0.1	0.1	0.1	0.1	0.1	0.1	0.1	0.1	0.1	0.1	0.1	0.1	0.1	0.1	0.1	0.1	0.1	0.1	0.1	0.1	0.1	0.1	0.1	0.1	0.1	0.1	0.1	0.1	0.1	0.1	0.1	0.1	0.1	0.1	0.1	0.1	0.1	0.1	0.1	0.1	0.1	0.1	0.1	0.1
1827	0.1	0.1	0.1	0.1	0.1	0.1	0.1	0.1	0.1	0.1	0.1	0.1	0.1	0.1	0.1	0.1	0.1	0.1	0.1	0.1	0.1	0.1	0.1	0.1	0.1	0.1	0.1	0.1	0.1	0.1	0.1	0.1	0.1	0.1	0.1	0.1	0.1	0.1	0.1	0.1	0.1	0.1	0.1	0.1	0.1	0.1	0.1	0.1	0.1
136	0.1	0.1	0.1	0.1	0.1	0.1	0.1	0.1	0.1	0.1	0.1	0.1	0.1	0.1	0.1	0.1	0.1	0.1	0.1	0.1	0.1	0.1	0.1	0.1	0.1	0.1	0.1	0.1	0.1	0.1	0.1	0.1	0.1	0.1	0.1	0.1	0.1	0.1	0.1	0.1	0.1	0.1	0.1	0.1	0.1	0.1	0.1	0.1	0.1
144	0.1	0.1	0.1	0.1	0.1	0.1	0.1	0.1	0.1	0.1	0.1	0.1	0.1	0.1	0.1	0.1	0.1	0.1	0.1	0.1	0.1	0.1	0.1	0.1	0.1	0.1	0.1	0.1	0.1	0.1	0.1	0.1	0.1	0.1	0.1	0.1	0.1	0.1	0.1	0.1	0.1	0.1	0.1	0.1	0.1	0.1	0.1	0.1	0.1
2440	0.1	0.1	0.1	0.1	0.1	0.1	0.1	0.1	0.1	0.1	0.1	0.1	0.1	0.1	0.1	0.1	0.1	0.1	0.1	0.1	0.1	0.1	0.1	0.1	0.1	0.1	0.1	0.1	0.1	0.1	0.1	0.1	0.1	0.1	0.1	0.1	0.1	0.1	0.1	0.1	0.1	0.1	0.1	0.1	0.1	0.1	0.1	0.1	0.1
1927	0.1	0.1	0.1	0.1	0.1	0.1	0.1	0.1	0.1	0.1	0.1	0.1	0.1	0.1	0.1	0.1	0.1	0.1	0.1	0.1	0.1	0.1	0.1	0.1	0.1	0.1	0.1	0.1	0.1	0.1	0.1	0.1	0.1	0.1	0.1	0.1	0.1	0.1	0.1	0.1	0.1	0.1	0.1	0.1	0.1	0.1	0.1	0.1	0.1
432	0.1	0.1	0.1	0.1	0.1	0.1	0.1	0.1	0.1	0.1	0.1	0.1	0.1	0.1	0.1	0.1	0.1	0.1	0.1	0.1	0.1	0.1	0.1	0.1	0.1	0.1	0.1	0.1	0.1	0.1	0.1	0.1	0.1	0.1	0.1	0.1	0.1	0.1	0.1	0.1	0.1	0.1	0.1	0.1	0.1	0.1	0.1	0.1	0.1
457	0.1	0.1	0.1	0.1	0.1	0.1	0.1	0.1	0.1	0.1	0.1	0.1	0.1	0.1	0.1	0.1	0.1	0.1	0.1	0.1	0.1	0.1	0.1	0.1	0.1	0.1	0.1	0.1	0.1	0.1	0.1	0.1	0.1	0.1	0.1	0.1	0.1	0.1	0.1	0.1	0.1	0.1	0.1	0.1	0.1	0.1	0.1	0.1	0.1
292	0.1	0.1	0.1	0.1	0.1	0.1	0.1	0.1	0.1	0.1	0.1	0.1	0.1	0.1	0.1	0.1	0.1	0.1	0.1	0.1	0.1	0.1	0.1	0.1	0.1	0.1	0.1	0.1	0.1	0.1	0.1	0.1	0.1	0.1	0.1	0.1	0.1	0.1	0.1	0.1	0.1	0.1	0.1	0.1	0.1	0.1	0.1	0.1	0.1
343	0.1	0.1	0.1	0.1	0.1	0.1	0.1	0.1	0.1	0.1	0.1	0.1	0.1	0.1	0.1	0.1	0.1	0.1	0.1	0.1	0.1	0.1	0.1	0.1	0.1	0.1	0.1	0.1	0.1	0.1	0.1	0.1	0.1	0.1	0.1	0.1	0.1	0.1	0.1	0.1	0.1	0.1	0.1	0.1	0.1	0.1	0.1	0.1	0.1
2190	0.1	0.1	0.1	0.1	0.1	0.1	0.1	0.1	0.1	0.1	0.1	0.1	0.1	0.1	0.1	0.1	0.1	0.1	0.1	0.1	0.1	0.1	0.1	0.1	0.1	0.1	0.1	0.1	0.1	0.1	0.1	0.1	0.1	0.1	0.1	0.1	0.1	0.1	0.1	0.1	0.1	0.1	0.1	0.1	0.1	0.1	0.1	0.1	0.1
142	0.1	0.1	0.1	0.1	0.1	0.1	0.1	0.1	0.1	0.1	0.1	0.1	0.1	0.1	0.1	0.1	0.1	0.1	0.1	0.1	0.1	0.1	0.1	0.1	0.1	0.1	0.1	0.1	0.1	0.1	0.1	0.1	0.1	0.1	0.1	0.1	0.1	0.1	0.1	0.1	0.1	0.1	0.1	0.1	0.1	0.1	0.1	0.1	0.1
159	0.1	0.1	0.1	0.1	0.1	0.1	0.1	0.1	0.1	0.1	0.1	0.1	0.1	0.1	0.1	0.1	0.1	0.1	0.1	0.1	0.1	0.1	0.1	0.1	0.1	0.1	0.1	0.1	0.1	0.1	0.1	0.1	0.1	0.1	0.1	0.1	0.1	0.1	0.1	0.1	0.1	0.1	0.1	0.1	0.1	0.1	0.1	0.1	0.1
145	0.1	0.1	0.1	0.1	0.1	0.1	0.1	0.1	0.1	0.1	0.1	0.1	0.1	0.1	0.1	0.1	0.1	0.1	0.1	0.1	0.1	0.1	0.1	0.1	0.1	0.1	0.1	0.1	0.1	0.1	0.1	0.1	0.1	0.1	0.1	0.1	0.1	0.1	0.1	0.1	0.1	0.1	0.1	0.1	0.1	0.1	0.1	0.1	0.1
147	0.1	0.1	0.1	0.1	0.1	0.1	0.1	0.1	0.1	0.1	0.1	0.1	0.1	0.1	0.1	0.1	0.1	0.1	0.1	0.1	0.1	0.1	0.1	0.1	0.1	0.1	0.1	0.1	0.1	0.1	0.1	0.1	0.1	0.1	0.1	0.1	0.1	0.1	0.1	0.1	0.1	0.1	0.1	0.1	0.1	0.1	0.1	0.1	0.1
316	0.1	0.1	0.1	0.1	0.1	0.1	0.1	0.1	0.1	0.1	0.1	0.1	0.1	0.1	0.1	0.1	0.1	0.1	0.1	0.1	0.1	0.1	0.1	0.1	0.1	0.1	0.1	0.1	0.1	0.1	0.1	0.1	0.1	0.1	0.1	0.1	0.1	0.1	0.1	0.1	0.1	0.1	0.1	0.1	0.1	0.1	0.1	0.1	0.1
420	0.1	0.1	0.1	0.1	0.1	0.1	0.1	0.1	0.1	0.1	0.1	0.1	0.1	0.1	0.1	0.1	0.1	0.1	0.1	0.1	0.1	0.1	0.1	0.1	0.1	0.1	0.1	0.1	0.1	0.1	0.1	0.1	0.1	0.1	0.1	0.1	0.1	0.1	0.1	0.1	0.1	0.1	0.1	0.1	0.1	0.1	0.1	0.1	0.1
313	0.1	0.1	0.1	0.1	0.1	0.1	0.1	0.1	0.1	0.1	0.1	0.1	0.1	0.1	0.1	0.1	0.1	0.1	0.1	0.1	0.1	0.1	0.1	0.1	0.1	0.1	0.1	0.1	0.1	0.1	0.1	0.1	0.1	0.1	0.1	0.1	0.1	0.1	0.1	0.1	0.1	0.1	0.1	0.1	0.1	0.1	0.1	0.1	0.1
3858	0.1	0.1	0.1	0.1	0.1	0.1	0.1	0.1	0.1	0.1	0.1	0.1	0.1	0.1	0.1	0.1	0.1	0.1	0.1	0.1	0.1	0.1	0.1	0.1	0.1	0.1	0.1	0.1	0.1	0.1	0.1	0.1	0.1	0.1	0.1	0.1	0.1	0.1	0.1	0.1	0.1	0.1	0.1	0.1	0.1	0.1	0.1	0.1	0.1
1746	0.1	0.1	0.1	0.1	0.1	0.1	0.1	0.1	0.1	0.1	0.1	0.1	0.1	0.1	0.1	0.1	0.1	0.1	0.1	0.1	0.1	0.1	0.1	0.1	0.1	0.1	0.1	0.1	0.1	0.1	0.1	0.1	0.1	0.1	0.1	0.1	0.1	0.1	0.1	0.1	0.1	0.1	0.1	0.1	0.1	0.1	0.1	0.1	0.1
287	0.1	0.1	0.1	0.1	0.1	0.1	0.1	0.1	0.1	0.1	0.1	0.1	0.1	0.1	0.1	0.1	0.1	0.1	0.1	0.1	0.1	0.1	0.1	0.1	0.1	0.1	0.1	0.1	0.1	0.1	0.1	0.1	0.1	0.1	0.1	0.1	0.1	0.1	0.1	0.1	0.1	0.1	0.1	0.1	0.1	0.1	0.1	0.1	0.1
24	0.1	0.1	0.1	0.1	0.1	0.1	0.1	0.1	0.1	0.1	0.1	0.1	0.1	0.1	0.1	0.1	0.1	0.1	0.1	0.1	0.1	0.1	0.1	0.1	0.1	0.1	0.1	0.1	0.1	0.1	0.1	0.1	0.1	0.1	0.1	0.1	0.1	0.1	0.1	0.1	0.1	0.1	0.1	0.1	0.1	0.1	0.1	0.1	0.1
21	0.1	0.1	0.1	0.1	0.1	0.1	0.1	0.1	0.1	0.1	0.1	0.1	0.1	0.1	0.1	0.1	0.1	0.1	0.1	0.1	0.1	0.1	0.1	0.1	0.1	0.1	0.1	0.1	0.1	0.1	0.1	0.1	0.1	0.1	0.1	0.1	0.1	0.1	0.1	0.1	0.1	0.1	0.1	0.1	0.1	0.1	0.1	0.1	0.1
1929	0.1	0.1	0.1	0.1	0.1	0.1	0.1	0.1	0.1	0.1	0.1	0.1	0.1	0.1	0.1	0.1	0.1	0.1	0.1	0.1	0.1	0.1	0.1	0.1	0.1	0.1	0.1	0.1	0.1	0.1	0.1	0.1	0.1	0.1	0.1	0.1	0.1	0.1	0.1	0.1	0.1	0.1	0.1	0.1	0.1	0.1	0.1	0.1	0.1
3785	0.1	0.1	0.1	0.1	0.1	0.1	0.1	0.1	0.1	0.1	0.1	0.1	0.1	0.1	0.1	0.1	0.1	0.1	0.1	0.1	0.1	0.1	0.1	0.1	0.1	0.1	0.1	0.1	0.1	0.1	0.1	0.1	0.1	0.1	0.1	0.1	0.1	0.1	0.1	0.1	0.1	0.1	0.1	0.1	0.1	0.1	0.1	0.1	0.1
297	0.1	0.1	0.1	0.1	0.1	0.1	0.1	0.1	0.1	0.1	0.1	0.1	0.1	0.1	0.1	0.1	0.1	0.1	0.1	0.1	0.1	0.1	0.1	0.1	0.1	0.1	0.1	0.1	0.1	0.1	0.1	0.1	0.1	0.1	0.1	0.1	0.1	0.1	0.1	0.1	0.1	0.1	0.1	0.1	0.1	0.1	0.1	0.1	0.1
98	0.1	0.1	0.1	0.1	0.1	0.1	0.1	0.1	0.1	0.1	0.1	0.1	0.1	0.1	0.1	0.1	0.1	0.1	0.1	0.1	0.1	0.1	0.1	0.1	0.1	0.1	0.1	0.1	0.1	0.1	0.1	0.1	0.1	0.1	0.1	0.1	0.1	0.1	0.1	0.1	0.1	0.1	0.1	0.1	0.1	0.1	0.1	0.1	0.1
1789	0.1	0.1	0.1	0.1	0.1	0.1	0.1	0.1	0.1	0.1	0.1	0.1	0.1	0.1	0.1	0.1	0.1	0.1	0.1	0.1	0.1	0.1	0.1	0.1	0.1	0.1	0.1	0.1	0.1	0.1	0.1	0.1	0.1	0.1	0.1	0.1	0.1	0.1	0.1	0.1	0.1	0.1	0.1	0.1	0.1	0.1	0.1	0.1	0.1
1783	0.1	0.1	0.1	0.1	0.1	0.1	0.1	0.1	0.1	0.1	0.1	0.1	0.1	0.1	0.1	0.1	0.1	0.1	0.1	0.1	0.1	0.1	0.1	0.1	0.1	0.1	0.1	0.1	0.1	0.1	0.1	0.1	0.1	0.1	0.1	0.1	0.1	0.1	0.1	0.1	0.1	0.1	0.1	0.1	0.1	0.1	0.1	0.1	0.1
2392	0.1	0.1	0.1	0.1	0.1	0.1	0.1	0.1	0.1	0.1	0.1	0.1	0.1	0.1	0.1	0.1	0.1	0.1	0.1	0.1	0.1	0.1	0.1	0.1	0.1	0.1	0.1	0.1	0.1	0.1	0.1	0.1	0.1	0.1	0.1	0.1	0.1	0.1	0.1	0.1	0.1	0.1	0.1	0.1	0.1	0.1	0.1	0.1	0.1
2311	0.1	0.1	0.1	0.1	0.1	0.1	0.1	0.1	0.1	0.1	0.1	0.1	0.1	0.1	0.1	0.1	0.1	0.1	0.1	0.1	0.1	0.1	0.1	0.1	0.1	0.1	0.1	0.1	0.1	0.1	0.1	0.1	0.1	0.1	0.1	0.1	0.1	0.1	0.1	0.1	0.1	0.1	0.1	0.1	0.1	0.1	0.1	0.1	0.1
2393	0.1	0.1	0.1	0.1	0.1	0.1	0.1	0.1	0.1	0.1	0.1	0.1	0.1	0.1	0.1	0.1	0.1	0.1	0.1	0.1	0.1	0.1	0.1	0.1	0.1	0.1	0.1	0.1	0.1	0.1	0.1	0.1	0.1	0.1	0.1	0.1	0.1	0.1	0.1	0.1	0.1	0.1	0.1	0.1	0.1	0.1	0.1	0.1	0.1
2394	0.1	0.1	0.1	0.1	0.1	0.1	0.1	0.1	0.1	0.1	0.1	0.1	0.1	0.1	0.1	0.1	0.1	0.1	0.1	0.1	0.1	0.1	0.1	0.1	0.1	0.1	0.1	0.1	0.1	0.1	0.1	0.1	0.1	0.1	0.1	0.1	0.1	0.1	0.1	0.1	0.1	0.1	0.1	0.1	0.1	0.1	0.1	0.1	0.1
2391	0.1	0.1	0.1	0.1	0.1	0.1	0.1	0.1	0.1	0.1	0.1	0.1	0.1	0.1	0.1	0.1	0.1	0.1	0.1	0.1	0.1	0.1	0.1	0.1	0.1	0.1	0.1	0.1	0.1	0.1	0.1	0.1	0.1	0.1	0.1	0.1	0.1	0.1	0.1	0.1	0.1	0.1	0.1	0.1	0.1	0.1	0.1	0.1	0.1
2389	0.1	0.1	0.1	0.1	0.1	0.1	0.1	0.1	0.1	0.1	0.1	0.1	0.1	0.1	0.1	0.1	0.1	0.1	0.1	0.1	0.1	0.1	0.1	0.1	0.1	0.1	0.1	0.1	0.1	0.1	0.1	0.1	0.1	0.1	0.1	0.1	0.1	0.1	0.1	0.1	0.1	0.1	0.1	0.1	0.1	0.1	0.1	0.1	0.1
307	0.1	0.1	0.1	0.1	0.1	0.1	0.1	0.1	0.1	0.1	0.1	0.1	0.1	0.1	0.1	0.1	0.1	0.1	0.1	0.1	0.1	0.1	0.1	0.1	0.1	0.1	0.1	0.1	0.1	0.1	0.1	0.1	0.1	0.1	0.1	0.1	0.1	0.1	0.1	0.1	0.1	0.1	0.1	0.1	0.1	0.1	0.1	0.1	0.1
3766	0.1	0.1	0.1	0.1	0.1	0.1	0.1	0.1	0.1	0.1	0.1	0.1	0.1	0.1	0.1	0.1	0.1	0.1	0.1	0.1	0.1	0.1	0.1	0.1	0.1	0.1	0.1	0.1	0.1	0.1	0.1	0.1	0.1	0.1	0.1	0.1	0.1	0.1	0.1	0.1	0.1	0.1	0.1	0.1	0.1	0.1	0.1	0.1	0.1
2418	0.1	0.1	0.1	0.1	0.1	0.1	0.1	0.1	0.1	0.1	0.1	0.1	0.1	0.1	0.1	0.1	0.1	0.1	0.1	0.1	0.1	0.1	0.1	0.1	0.1	0.1	0.1	0.1	0.1	0.1	0.1	0.1	0.1	0.1	0.1	0.1	0.1	0.1	0.1	0.1	0.1	0.1	0.1	0.1	0.1	0.1	0.1	0.1	0.1
1748	0.1	0.1	0.1	0.1	0.1	0.1	0.1	0.1	0.1	0.1	0.1	0.1	0.1	0.1	0.1	0.1	0.1	0.1	0.1	0.1	0.1	0.1	0.1	0.1	0.1	0.1	0.1	0.1	0.1	0.1	0.1	0.1	0.1	0.1	0.1	0.1	0.1	0.1	0.1	0.1	0.1	0.1	0.1	0.1	0.1	0.1	0.1	0.1	0.1
3793	0.1	0.1	0.1	0.1	0.1	0.1	0.1	0.1	0.1	0.1	0.1	0.1	0.1	0.1	0.1	0.1	0.1	0.1	0.1	0.1	0.1	0.1	0.1	0.1	0.1	0.1	0.1	0.1	0.1	0.1	0.1	0.1	0.1	0.1	0.1	0.1	0.1	0.1	0.1	0.1	0.1	0.1	0.1	0.1	0.1	0.1	0.1	0.1	0.1
169	0.1	0.1	0.1	0.1	0.1	0.1	0.1	0.1	0.1	0.1	0.1	0.1	0.1	0.1	0.1	0.1	0.1	0.1	0.1	0.1	0.1	0.1	0.1	0.1	0.1	0.1	0.1	0.1	0.1	0.1	0.1	0.1	0.1	0.1	0.1	0.1	0.1	0.1	0.1	0.1	0.1	0.1	0.1	0.1	0.1	0.1	0.1	0.1	0.1
2150	0.1	0.1	0.1	0.1	0.1	0.1	0.1	0.1	0.1	0.1	0.1	0.1	0.1	0.1	0.1	0.1	0.1	0.1	0.1	0.1	0.1	0.1	0.1	0.1	0.1	0.1	0.1	0.1	0.1	0.1	0.1	0.1	0.1	0.1	0.1	0.1	0.1	0.1	0.1	0.1	0.1	0.1	0.1	0.1	0.1	0.1	0.1	0.1	0.1
3827	0.1	0.1	0.1	0.1	0.1	0.1	0.1	0.1	0.1	0.1	0.1	0.1	0.1	0.1	0.1	0.1	0.1	0.1	0.1	0.1	0.1	0.1	0.1	0.1	0.1	0.1	0.1	0.1	0.1	0.1	0.1	0.1	0.1	0.1	0.1	0.1	0.1	0.1	0.1	0.1	0.1	0.1	0.1	0.1	0.1	0.1	0.1	0.1	0.1
3777	0.1	0.1	0.1	0.1	0.1	0.1	0.1	0.1	0.1	0.1	0.1	0.1	0.1	0.1	0.1	0.1	0.1	0.1	0.1	0.1	0.1	0.1	0.1	0.1	0.1	0.1	0.1	0.1	0.1	0.1	0.1	0.1	0.1	0.1	0.1	0.1	0.1	0.1	0.1	0.1	0.1	0.1	0.1	0.1	0.1	0.1	0.1	0.1	0.1
137	0.1	0.1	0.1	0.1	0.1	0.1	0.1	0.1	0.1	0.1	0.1	0.1	0.1	0.1	0.1	0.1	0.1	0.1	0.1	0.1	0.1	0.1	0.1	0.1	0.1	0.1	0.1	0.1	0.1	0.1	0.1	0.1	0.1	0.1	0.1	0.1	0.1	0.1	0.1	0.1	0.1	0.1	0.1	0.1	0.1	0.1	0.1	0.1	0.1
143	0.1	0.1	0.1	0.1	0.1	0.1	0.1	0.1	0.1	0.1	0.1	0.1	0.1	0.1	0.1	0.1	0.1	0.1	0.1	0.1	0.1	0.1	0.1	0.1	0.1	0.1	0.1	0.1	0.1	0.1	0.1	0.1	0.1	0.1	0.1	0.1	0.1	0.1	0.1	0.1	0.1	0.1	0.1	0.1	0.1	0.1	0.1	0.1	0.1
139	0.1	0.1	0.1	0.1	0.1	0.1	0.1	0.1	0.1	0.1	0.1	0.1	0.1	0.1	0.1	0.1	0.1	0.1	0.1	0.1	0.1	0.1	0.1	0.1	0.1	0.1	0.1	0.1	0.1	0.1	0.1	0.1	0.1	0.1	0.1	0.1	0.1	0.1	0.1	0.1	0.1	0.1	0.1	0.1	0.1	0.1	0.1	0.1	0.1
135	0.1	0.1	0.1	0.1	0.1	0.1	0.1	0.1	0.1	0.1	0.1	0.1	0.1	0.1	0.1	0.1	0.1	0.1	0.1	0.1	0.1	0.1	0.1	0.1	0.1	0.1	0.1	0.1	0.1	0.1	0.1	0.1	0.1	0.1	0.1	0.1	0.1	0.1	0.1	0.1	0.1	0.1	0.1	0.1	0.1	0.1	0.1	0.1	0.1
140	0.1	0.1	0.1	0.1	0.1	0.1	0.1	0.1	0.1	0.1	0.1	0.1	0.1	0.1	0.1	0.1	0.1	0.1	0.1	0.1	0.1	0.1	0.1	0.1	0.1	0.1	0.1	0.1	0.1	0.1	0.1	0.1	0.1	0.1	0.1	0.1	0.1	0.1	0.1	0.1	0.1	0.1	0.1	0.1	0.1	0.1	0.1	0.1	0.1
141	0.1	0.1	0.1	0.1	0.1	0.1	0.1	0.1	0.1	0.1	0.1	0.1	0.1	0.1	0.1	0.1	0.1	0.1	0.1	0.1	0.1	0.1	0.1	0.1	0.1	0.1	0.1	0.1	0.1	0.1	0.1	0.1	0.1	0.1	0.1	0.1	0.1	0.1	0.1	0.1	0.1	0.1	0.1	0.1	0.1	0.1	0.1	0.1	0.1
328	0.1	0.1	0.1	0.1	0.1	0.1	0.1	0.1	0.1	0.1	0.1	0.1	0.1	0.1	0.1	0.1	0.1	0.1	0.1	0.1	0.1	0.1	0.1	0.1	0.1	0.1	0.1	0.1	0.1	0.1	0.1	0.1	0.1	0.1	0.1	0.1	0.1	0.1	0.1	0.1	0.1	0.1	0.1	0.1	0.1	0.1	0.1	0.1	0.1
1825	0.1	0.1	0.1	0.1	0.1	0.1	0.1	0.1	0.1	0.1	0.1	0.1	0.1	0.1	0.1	0.1	0.1	0.1	0.1	0.1	0.1	0.1	0.1	0.1	0.1	0.1	0.1	0.1	0.1	0.1	0.1	0.1	0.1	0.1	0.1	0.1	0.1	0.1	0.1	0.1	0.1	0.1	0.1	0.1	0.1	0.1	0.1	0.1	0.1
294	0.1	0.1	0.1	0.1	0.1	0.1	0.1	0.1	0.1	0.1	0.1	0.1	0.1	0.1	0.1	0.1	0.1	0.1	0.1	0.1	0.1	0.1	0.1	0.1	0.1	0.1	0.1	0.1	0.1	0.1	0.1	0.1	0.1	0.1	0.1	0.1	0.1	0.1	0.1	0.1	0.1	0.1	0.1	0.1	0.1	0.1	0.1	0.1	0.1
3910	0.1	0.1	0.1	0.1	0.1	0.1	0.1	0.1	0.1	0.1	0.1	0.1	0.1	0.1	0.1	0.1	0.1	0.1	0.1	0.1	0.1	0.1	0.1	0.1	0.1	0.1	0.1	0.1	0.1	0.1	0.1	0.1	0.1	0.1	0.1	0.1	0.1	0.1	0.1	0.1	0.1	0.1	0.1	0.1	0.1	0.1	0.1	0.1	0.1
431	0.1	0.1	0.1	0.1	0.1	0.1	0.1	0.1	0.1	0.1	0.1	0.1	0.1	0.1	0.1	0.1	0.1	0.1	0.1	0.1	0.1	0.1	0.1	0.1	0.1	0.1	0.1	0.1	0.1	0.1	0.1	0.1	0.1	0.1	0.1	0.1	0.1	0.1	0.1	0.1	0.1	0.1	0.1	0.1	0.1	0.1	0.1	0.1	0.1
310	0.1	0.1	0.1	0.1	0.1	0.1	0.1	0.1	0.1	0.1	0.1	0.1	0.1	0.1	0.1	0.1	0.1	0.1	0.1	0.1	0.1	0.1	0.1	0.1	0.1	0.1	0.1	0.1	0.1	0.1	0.1	0.1	0.1	0.1	0.1	0.1	0.1	0.1	0.1	0.1	0.1	0.1	0.1	0.1	0.1	0.1	0.1	0.1	0.1
426	0.1	0.1	0.1	0.1	0.1	0.1	0.1	0.1	0.1	0.1	0.1	0.1	0.1	0.1	0.1	0.1	0.1	0.1	0.1	0.1	0.1	0.1	0.1	0.1	0.1	0.1	0.1	0.1	0.1	0.1	0.1	0.1	0.1	0.1	0.1	0.1	0.1	0.1	0.1	0.1	0.1	0.1	0.1	0.1	0.1	0.1	0.1	0.1	0.1
425	0.1	0.1	0.1	0.1	0.1	0.1	0.1	0.1	0.1	0.1	0.1	0.1	0.1	0.1	0.1	0.1	0.1	0.1	0.1	0.1	0.1	0.1	0.1	0.1	0.1	0.1	0.1	0.1	0.1	0.1	0.1	0.1	0.1	0.1	0.1	0.1	0.1	0.1	0.1	0.1	0.1	0.1	0.1	0.1	0.1	0.1	0.1	0.1	0.1
1922	0.1	0.1	0.1	0.1	0.1	0.1	0.1	0.1	0.1	0.1	0.1	0.1	0.1	0.1	0.1	0.1	0.1	0.1	0.1	0.1	0.1	0.1	0.1	0.1	0.1	0.1	0.1	0.1	0.1	0.1	0.1	0.1	0.1	0.1	0.1	0.1	0.1	0.1	0.1	0.1	0.1	0.1	0.1	0.1	0.1	0.1	0.1	0.1	0.1
3790	0.1	0.1	0.1	0.1	0.1	0.1	0.1	0.1	0.1	0.1	0.1	0.1	0.1	0.1	0.1	0.1	0.1	0.1	0.1	0.1	0.1	0.1	0.1	0.1	0.1	0.1	0.1	0.1	0.1	0.1	0.1	0.1	0.1	0.1	0.1	0.1	0.1	0.1	0.1	0.1	0.1	0.1	0.1	0.1	0.1	0.1	0.1	0.1	0.1
2173	0.1	0.1	0.1	0.1	0.1	0.1	0.1	0.1	0.1	0.1	0.1	0.1	0.1	0.1	0.1	0.1	0.1	0.1	0.1	0.1	0.1	0.1	0.1	0.1	0.1	0.1	0.1	0.1	0.1	0.1	0.1	0.1	0.1	0.1	0.1	0.1	0.1	0.1	0.1	0.1	0.1	0.1	0.1	0.1	0.1	0.1	0.1	0.1	0.1
1703	0.1	0.1	0.1	0.1	0.1	0.1	0.1	0.1	0.1	0.1	0.1	0.1	0.1	0.1	0.1	0.1	0.1	0.1	0.1	0.1	0.1	0.1	0.1	0.1	0.1	0.1	0.1	0.1	0.1	0.1	0.1	0.1	0.1	0.1	0.1	0.1	0.1	0.1	0.1	0.1	0.1	0.1	0.1	0.1	0.1	0.1	0.1	0.1	0.1
4327	0.1	0.1	0.1	0.1	0.1	0.1	0.1	0.1	0.1	0.1	0.1	0.1	0.1	0.1	0.1	0.1	0.1	0.1	0.1	0.1	0.1	0.1	0.1	0.1	0.1	0.1	0.1	0.1	0.1	0.1	0.1	0.1	0.1	0.1	0.1	0.1	0.1	0.1	0.1	0.1	0.1	0.1	0.1	0.1	0.1	0.1	0.1	0.1	0.1
4269	0.1	0.1	0.1	0.1	0.1	0.1	0.1	0.1	0.1	0.1	0.1	0.1	0.1	0.1	0.1	0.1	0.1	0.1	0.1	0.1	0.1	0.1	0.1	0.1	0.1	0.1	0.1	0.1	0.1	0.1	0.1	0.1	0.1	0.1	0.1	0.1	0.1	0.1	0.1	0.1	0.1	0.1	0.1	0.1	0.1	0.1	0.1	0.1	0.1
3874	0.1	0.1	0.1	0.1	0.1	0.1	0.1	0.1	0.1	0.1	0.1	0.1	0.1	0.1	0.1	0.1	0.1	0.1	0.1	0.1	0.1	0.1	0.1	0.1	0.1	0.1	0.1	0.1	0.1	0.1	0.1	0.1	0.1	0.1	0.1	0.1	0.1	0.1	0.1	0.1	0.1	0.1	0.1	0.1	0.1	0.1	0.1	0.1	0.1
1974	0.1	0.1	0.1	0.1	0.1	0.1	0.1	0.1	0.1	0.1	0.1	0.1	0.1	0.1	0.1	0.1	0.1	0.1	0.1	0.1	0.1	0.1	0.1	0.1	0.1	0.1	0.1	0.1	0.1	0.1	0.1	0.1	0.1	0.1	0.1	0.1	0.1	0.1	0.1	0.1	0.1	0.1	0.1	0.1	0.1	0.1	0.1	0.1	0.1
1877	0.1	0.1	0.1	0.1	0.1	0.1	0.1	0.1	0.1	0.1	0.1	0.1	0.1	0.1	0.1	0.1	0.1	0.1	0.1	0.1	0.1	0.1	0.1	0.1	0.1	0.1	0.1	0.1	0.1	0.1	0.1	0.1	0.1	0.1	0.1	0.1	0.1	0.1	0.1	0.1	0.1	0.1	0.1	0.1	0.1	0.1	0.1	0.1	0.1
3853	0.1	0.1	0.1	0.1	0.1	0.1	0.1	0.1	0.1	0.1	0.1	0.1	0.1	0.1	0.1	0.1	0.1	0.1	0.1	0.1	0.1	0.1	0.1	0.1	0.1	0.1	0.1	0.1	0.1	0.1	0.1	0.1	0.1	0.1	0.1	0.1	0.1	0.1	0.1	0.1	0.1	0.1	0.1	0.1	0.1	0.1	0.1	0.1	0.1
282	0.1	0.1	0.1	0.1	0.1	0.1	0.1	0.1	0.1	0.1	0.1	0.1	0.1	0.1	0.1	0.1	0.1	0.1	0.1	0.1	0.1	0.1	0.1	0.1	0.1	0.1	0.1	0.1	0.1	0.1	0.1	0.1	0.1	0.1	0.1	0.1	0.1	0.1	0.1	0.1	0.1	0.1	0.1	0.1	0.1	0.1	0.1	0.1	0.1
165	0.1	0.1	0.1	0.1	0.1	0.1	0.1	0.1	0.1	0.1	0.1	0.1	0.1	0.1	0.1	0.1	0.1	0.1	0.1	0.1	0.1	0.1	0.1	0.1	0.1	0.1	0.1	0.1	0.1	0.1	0.1	0.1	0.1	0.1	0.1	0.1	0.1	0.1	0.1	0.1	0.1	0.1	0.1	0.1	0.1	0.1	0.1	0.1	0.1
455	0.1	0.1	0.1	0.1	0.1	0.1	0.1	0.1	0.1	0.1	0.1	0.1	0.1	0.1	0.1	0.1	0.1	0.1	0.1	0.1	0.1	0.1	0.1	0.1	0.1	0.1	0.1	0.1	0.1	0.1	0.1	0.1	0.1	0.1	0.1	0.1	0.1	0.1	0.1	0.1	0.1	0.1	0.1	0.1	0.1	0.1	0.1	0.1	0.1
17	0.1	0.1	0.1	0.1	0.1	0.1	0.1	0.1	0.1	0.1	0.1	0.1	0.1	0.1	0.1	0.1	0.1	0.1	0.1	0.1	0.1	0.1	0.1	0.1	0.1	0.1	0.1	0.1	0.1	0.1	0.1	0.1	0.1	0.1	0.1	0.1	0.1	0.1	0.1	0.1	0.1	0.1	0.1	0.1	0.1	0.1	0.1	0.1	0.1
138	0.1	0.1	0.1	0.1	0.1	0.1	0.1	0.1	0.1	0.1	0.1	0.1	0.1	0.1	0.1	0.1	0.1	0.1	0.1	0.1	0.1	0.1	0.1	0.1	0.1	0.1	0.1	0.1	0.1	0.1	0.1	0.1	0.1	0.1	0.1	0.1	0.1	0.1	0.1	0.1	0.1	0.1	0.1	0.1	0.1	0.1	0.1	0.1	0.1
3894	0.1	0.1	0.1	0.1	0.1	0.1	0.1	0.1	0.1	0.1	0.1	0.1	0.1	0.1	0.1	0.1	0.1	0.1	0.1	0.1	0.1	0.1	0.1	0.1	0.1	0.1	0.1	0.1	0.1	0.1	0.1	0.1	0.1	0.1	0.1	0.1	0.1	0.1	0.1	0.1	0.1	0.1	0.1	0.1	0.1	0.1	0.1	0.1	0.1
354	0.1	0.1	0.1	0.1	0.1	0.1	0.1	0.1	0.1	0.1	0.1	0.1	0.1	0.1	0.1	0.1	0.1	0.1	0.1	0.1	0.1	0.1	0.1	0.1	0.1	0.1	0.1	0.1	0.1	0.1	0.1	0.1	0.1	0.1	0.1	0.1	0.1	0.1	0.1	0.1	0.1	0.1	0.1	0.1	0.1	0.1	0.1	0.1	0.1
2007	0.1	0.1	0.1	0.1	0.1	0.1	0.1	0.1	0.1	0.1	0.1	0.1	0.1	0.1	0.1	0.1	0.1	0.1	0.1	0.1	0.1	0.1	0.1	0.1	0.1	0.1	0.1	0.1	0.1	0.1	0.1	0.1	0.1	0.1	0.1	0.1	0.1	0.1	0.1	0.1	0.1	0.1	0.1	0.1	0.1	0.1	0.1	0.1	0.1
1847	0.1	0.1	0.1	0.1	0.1	0.1	0.1	0.1	0.1	0.1	0.1	0.1	0.1	0.1	0.1	0.1	0.1	0.1	0.1	0.1	0.1	0.1	0.1	0.1	0.1	0.1	0.1	0.1	0.1	0.1	0.1	0.1	0.1	0.1	0.1	0.1	0.1	0.1	0.1	0.1	0.1	0.1	0.1	0.1	0.1	0.1	0.1	0.1	0.1
44	0.1	0.1	0.1	0.1	0.1	0.1	0.1	0.1	0.1	0.1	0.1	0.1	0.1	0.1	0.1	0.1	0.1	0.1	0.1	0.1	0.1	0.1	0.1	0.1	0.1	0.1	0.1	0.1	0.1	0.1	0.1	0.1	0.1	0.1	0.1	0.1	0.1	0.1	0.1	0.1	0.1	0.1	0.1	0.1	0.1	0.1	0.1	0.1	0.1
3184	0.1	0.1	0.1	0.1	0.1	0.1	0.1	0.1	0.1	0.1	0.1	0.1	0.1	0.1	0.1	0.1	0.1	0.1	0.1	0.1	0.1	0.1	0.1	0.1	0.1	0.1	0.1	0.1	0.1	0.1	0.1	0.1	0.1	0.1	0.1	0.1	0.1	0.1	0.1	0.1	0.1	0.1	0.1	0.1	0.1	0.1	0.1	0.1	0.1
15	0.1	0.1	0.1	0.1	0.1	0.1	0.1	0.1	0.1	0.1	0.1	0.1	0.1	0.1	0.1	0.1	0.1	0.1	0.1	0.1	0.1	0.1	0.1	0.1	0.1	0.1	0.1	0.1	0.1	0.1	0.1	0.1	0.1	0.1	0.1	0.1	0.1	0.1	0.1	0.1	0.1	0.1	0.1	0.1	0.1	0.1	0.1	0.1	0.1
146	0.1	0.1	0.1	0.1	0.1	0.1	0.1	0.1	0.1	0.1	0.1	0.1	0.1	0.1	0.1	0.1	0.1	0.1	0.1	0.1	0.1	0.1	0.1	0.1	0.1	0.1	0.1	0.1	0.1	0.1	0.1	0.1	0.1	0.1	0.1	0.1	0.1	0.1	0.1	0.1	0.1	0.1	0.1	0.1	0.1	0.1	0.1	0.1	0.1
151	0.1	0.1	0.1	0.1	0.1	0.1	0.1	0.1	0.1	0.1	0.1	0.1	0.1	0.1	0.1	0.1	0.1	0.1	0.1	0.1	0.1	0.1	0.1	0.1	0.1	0.1	0.1	0.1	0.1	0.1	0.1	0.1	0.1	0.1	0.1	0.1	0.1	0.1	0.1	0.1	0.1	0.1	0.1	0.1	0.1	0.1	0.1	0.1	0.1
148	0.1	0.1	0.1	0.1	0.1	0.1	0.1	0.1	0.1	0.1	0.1	0.1	0.1	0.1	0.1	0.1	0.1	0.1	0.1	0.1	0.1	0.1	0.1	0.1	0.1	0.1	0.1	0.1	0.1	0.1	0.1	0.1	0.1	0.1	0.1	0.1	0.1	0.1	0.1	0.1	0.1	0.1	0.1	0.1	0.1	0.1	0.1	0.1	0.1
154	0.1	0.1	0.1	0.1	0.1	0.1	0.1	0.1	0.1	0.1	0.1	0.1	0.1	0.1	0.1	0.1	0.1	0.1	0.1	0.1	0.1	0.1	0.1	0.1	0.1	0.1	0.1	0.1	0.1	0.1	0.1	0.1	0.1	0.1	0.1	0.1	0.1	0.1	0.1	0.1	0.1	0.1	0.1	0.1	0.1	0.1	0.1	0.1	0.1
3866	0.1	0.1	0.1	0.1	0.1	0.1	0.1	0.1	0.1	0.1	0.1	0.1	0.1	0.1	0.1	0.1	0.1	0.1	0.1	0.1	0.1	0.1	0.1	0.1	0.1	0.1	0.1	0.1	0.1	0.1	0.1	0.1	0.1	0.1	0.1	0.1	0.1	0.1	0.1	0.1	0.1	0.1	0.1	0.1	0.1	0.1	0.1	0.1	0.1
170	0.1	0.1	0.1	0.1	0.1	0.1	0.1	0.1	0.1	0.1	0.1	0.1	0.1	0.1	0.1	0.1	0.1	0.1	0.1	0.1	0.1	0.1	0.1	0.1	0.1	0.1	0.1	0.1	0.1	0.1	0.1	0.1	0.1	0.1	0.1	0.1	0.1	0.1	0.1	0.1	0.1	0.1	0.1	0.1	0.1	0.1	0.1	0.1	0.1
171	0.1	0.1	0.1	0.1	0.1	0.1	0.1	0.1	0.1	0.1	0.1	0.1	0.1	0.1	0.1	0.1	0.1	0.1	0.1	0.1	0.1	0.1	0.1	0.1	0.1	0.1	0.1	0.1	0.1	0.1	0.1	0.1	0.1	0.1	0.1	0.1	0.1	0.1	0.1	0.1	0.1	0.1	0.1	0.1	0.1	0.1	0.1	0.1	0.1
3171	0.1	0.1	0.1	0.1	0.1	0.1	0.1	0.1	0.1	0.1	0.1	0.1	0.1	0.1	0.1	0.1	0.1	0.1	0.1	0.1	0.1	0.1	0.1	0.1	0.1	0.1	0.1	0.1	0.1	0.1	0.1	0.1	0.1	0.1	0.1	0.1	0.1	0.1	0.1	0.1	0.1	0.1	0.1	0.1	0.1	0.1	0.1	0.1	0.1
134	0.1	0.1	0.1	0.1	0.1	0.1	0.1	0.1	0.1	0.1	0.1	0.1	0.1	0.1	0.1	0.1	0.1	0.1	0.1	0.1	0.1	0.1	0.1	0.1	0.1	0.1	0.1	0.1	0.1	0.1	0.1	0.1	0.1	0.1	0.1	0.1	0.1	0.1	0.1	0.1	0.1	0.1	0.1	0.1	0.1	0.1	0.1	0.1	0.1
152	0.1	0.1	0.1	0.1	0.1	0.1	0.1	0.1	0.1	0.1	0.1	0.1	0.1	0.1	0.1	0.1	0.1	0.1	0.1	0.1	0.1	0.1	0.1	0.1	0.1	0.1	0.1	0.1	0.1	0.1	0.1	0.1	0.1	0.1	0.1	0.1	0.1	0.1	0.1	0.1	0.1	0.1	0.1	0.1	0.1	0.1	0.1	0.1	0.1
3199	0.1	0.1	0.1	0.1	0.1	0.1	0.1	0.1	0.1	0.1	0.1	0.1	0.1	0.1	0.1	0.1	0.1	0.1	0.1	0.1	0.1	0.1	0.1	0.1	0.1	0.1	0.1	0.1	0.1	0.1	0.1	0.1	0.1	0.1	0.1	0.1	0.1	0.1	0.1	0.1	0.1	0.1	0.1	0.1	0.1	0.1	0.1	0.1	0.1
3615	0.1	0.1	0.1	0.1	0.1	0.1	0.1	0.1	0.1	0.1	0.1	0.1	0.1	0.1	0.1	0.1	0.1	0.1	0.1	0.1	0.1	0.1	0.1	0.1	0.1	0.1	0.1	0.1	0.1	0.1	0.1	0.1	0.1	0.1	0.1	0.1	0.1	0.1	0.1	0.1	0.1	0.1	0.1	0.1	0.1	0.1	0.1	0.1	0.1
157	0.1	0.1	0.1	0.1	0.1	0.1	0.1	0.1	0.1	0.1	0.1	0.1	0.1	0.1	0.1	0.1	0.1	0.1	0.1	0.1	0.1	0.1	0.1	0.1	0.1	0.1	0.1	0.1	0.1	0.1	0.1	0.1	0.1	0.1	0.1	0.1	0.1	0.1	0.1	0.1	0.1	0.1	0.1	0.1	0.1	0.1	0.1	0.1	0.1
1925	0.1	0.1	0.1	0.1	0.1	0.1	0.1	0.1	0.1	0.1	0.1	0.1	0.1	0.1	0.1	0.1	0.1	0.1	0.1	0.1	0.1	0.1	0.1	0.1	0.1	0.1	0.1	0.1	0.1	0.1	0.1	0.1	0.1	0.1	0.1	0.1	0.1	0.1	0.1	0.1	0.1	0.1	0.1	0.1	0.1	0.1	0.1	0.1	0.1
9	0.1	0.1	0.1	0.1	0.1	0.1	0.1	0.1	0.1	0.1	0.1	0.1	0.1	0.1	0.1	0.1	0.1	0.1	0.1	0.1	0.1	0.1	0.1	0.1	0.1	0.1	0.1	0.1	0.1	0.1	0.1	0.1	0.1	0.1	0.1	0.1	0.1	0.1	0.1	0.1	0.1	0.1	0.1	0.1	0.1	0.1	0.1	0.1	0.1
8	0.1	0.1	0.1	0.1	0.1	0.1	0.1	0.1	0.1	0.1	0.1	0.1	0.1	0.1	0.1	0.1	0.1	0.1	0.1	0.1	0.1	0.1	0.1	0.1	0.1	0.1	0.1	0.1	0.1	0.1	0.1	0.1	0.1	0.1	0.1	0.1	0.1	0.1	0.1	0.1	0.1	0.1	0.1	0.1	0.1	0.1	0.1	0.1	0.1
3757	0.1	0.1	0.1	0.1	0.1	0.1	0.1	0.1	0.1	0.1	0.1	0.1	0.1	0.1	0.1	0.1	0.1	0.1	0.1	0.1	0.1	0.1	0.1	0.1	0.1	0.1	0.1	0.1	0.1	0.1	0.1	0.1	0.1	0.1	0.1	0.1	0.1	0.1	0.1	0.1	0.1	0.1	0.1	0.1	0.1	0.1	0.1	0.1	0.1
3755	0.1	0.1	0.1	0.1	0.1	0.1	0.1	0.1	0.1	0.1	0.1	0.1	0.1	0.1	0.1	0.1	0.1	0.1	0.1	0.1	0.1	0.1	0.1	0.1	0.1	0.1	0.1	0.1	0.1	0.1	0.1	0.1	0.1	0.1	0.1	0.1	0.1	0.1	0.1	0.1	0.1	0.1	0.1	0.1	0.1	0.1	0.1	0.1	0.1
3860	0.1	0.1	0.1	0.1	0.1	0.1	0.1	0.1	0.1	0.1	0.1	0.1	0.1	0.1	0.1	0.1	0.1	0.1	0.1	0.1	0.1	0.1	0.1	0.1	0.1	0.1	0.1	0.1	0.1	0.1	0.1	0.1	0.1	0.1	0.1	0.1	0.1	0.1	0.1	0.1	0.1	0.1	0.1	0.1	0.1	0.1	0.1	0.1	0.1
3744	0.1	0.1	0.1	0.1	0.1	0.1	0.1	0.1	0.1	0.1	0.1	0.1	0.1	0.1	0.1	0.1	0.1	0.1	0.1	0.1	0.1	0.1	0.1	0.1	0.1	0.1	0.1	0.1	0.1	0.1	0.1	0.1	0.1	0.1	0.1	0.1	0.1	0.1	0.1	0.1	0.1	0.1	0.1	0.1	0.1	0.1	0.1	0.1	0.1
3758	0.1	0.1	0.1	0.1	0.1	0.1	0.1	0.1	0.1	0.1	0.1	0.1	0.1	0.1	0.1	0.1	0.1	0.1	0.1	0.1	0.1	0.1	0.1	0.1	0.1	0.1	0.1	0.1	0.1	0.1	0.1	0.1	0.1	0.1	0.1	0.1	0.1	0.1	0.1	0.1	0.1	0.1	0.1	0.1	0.1	0.1	0.1	0.1	0.1
3830	0.1	0.1	0.1	0.1	0.1	0.1	0.1	0.1	0.1	0.1	0.1	0.1	0.1	0.1	0.1	0.1	0.1	0.1	0.1	0.1	0.1	0.1	0.1	0.1	0.1	0.1	0.1	0.1	0.1	0.1	0.1	0.1	0.1	0.1	0.1	0.1	0.1	0.1	0.1	0.1	0.1	0.1	0.1	0.1	0.1	0.1	0.1	0.1	0.1
3759	0.1	0.1	0.1	0.1	0.1	0.1	0.1	0.1	0.1	0.1	0.1	0.1	0.1	0.1	0.1	0.1	0.1	0.1	0.1	0.1	0.1	0.1	0.1	0.1	0.1	0.1	0.1	0.1	0.1	0.1	0.1	0.1	0.1	0.1	0.1	0.1	0.1	0.1	0.1	0.1	0.1	0.1	0.1	0.1	0.1	0.1	0.1	0.1	0.1
3778	0.1	0.1	0.1	0.1	0.1	0.1	0.1	0.1	0.1	0.1	0.1	0.1	0.1	0.1	0.1	0.1	0.1	0.1	0.1	0.1	0.1	0.1	0.1	0.1	0.1	0.1	0.1	0.1	0.1	0.1	0.1	0.1	0.1	0.1	0.1	0.1	0.1	0.1	0.1	0.1	0.1	0.1	0.1	0.1	0.1	0.1	0.1	0.1	0.1
3750	0.1	0.1	0.1	0.1	0.1	0.1	0.1	0.1	0.1	0.1	0.1	0.1	0.1	0.1	0.1	0.1	0.1	0.1	0.1	0.1	0.1	0.1	0.1	0.1	0.1	0.1	0.1	0.1	0.1	0.1	0.1	0.1	0.1	0.1	0.1	0.1	0.1	0.1	0.1	0.1	0.1	0.1	0.1	0.1	0.1	0.1	0.1	0.1	0.1
3749	0.1	0.1	0.1	0.1	0.1	0.1	0.1	0.1	0.1	0.1	0.1	0.1	0.1	0.1	0.1	0.1	0.1	0.1	0.1	0.1	0.1	0.1	0.1	0.1	0.1	0.1	0.1	0.1	0.1	0.1	0.1	0.1	0.1	0.1	0.1	0.1	0.1	0.1	0.1	0.1	0.1	0.1	0.1	0.1	0.1	0.1	0.1	0.1	0.1
6	0.1	0.1	0.1	0.1	0.1	0.1	0.1	0.1	0.1	0.1	0.1	0.1	0.1	0.1	0.1	0.1	0.1	0.1	0.1	0.1	0.1	0.1	0.1	0.1	0.1	0.1	0.1	0.1	0.1	0.1	0.1	0.1	0.1	0.1	0.1	0.1	0.1	0.1	0.1	0.1	0.1	0.1	0.1	0.1	0.1	0.1	0.1	0.1	0.1
3763	0.1	0.1	0.1	0.1	0.1	0.1	0.1	0.1	0.1	0.1	0.1	0.1	0.1	0.1	0.1	0.1	0.1	0.1	0.1	0.1	0.1	0.1	0.1	0.1	0.1	0.1	0.1	0.1	0.1	0.1	0.1	0.1	0.1	0.1	0.1	0.1	0.1	0.1	0.1	0.1	0.1	0.1	0.1	0.1	0.1	0.1	0.1	0.1	0.1
3851	0.1	0.1	0.1	0.1	0.1	0.1	0.1	0.1	0.1	0.1	0.1	0.1	0.1	0.1	0.1	0.1	0.1	0.1	0.1	0.1	0.1	0.1	0.1	0.1	0.1	0.1	0.1	0.1	0.1	0.1	0.1	0.1	0.1	0.1	0.1	0.1	0.1	0.1	0.1	0.1	0.1	0.1	0.1	0.1	0.1	0.1	0.1	0.1	0.1
3743	0.1	0.1	0.1	0.1	0.1	0.1	0.1	0.1	0.1	0.1	0.1	0.1	0.1	0.1	0.1	0.1	0.1	0.1	0.1	0.1	0.1	0.1	0.1	0.1	0.1	0.1	0.1	0.1	0.1	0.1	0.1	0.1	0.1	0.1	0.1	0.1	0.1	0.1	0.1	0.1	0.1	0.1	0.1	0.1	0.1	0.1	0.1	0.1	0.1
7	0.1	0.1	0.1	0.1	0.1	0.1	0.1	0.1	0.1	0.1	0.1	0.1	0.1	0.1	0.1	0.1	0.1	0.1	0.1	0.1	0.1	0.1	0.1	0.1	0.1	0.1	0.1	0.1	0.1	0.1	0.1	0.1	0.1	0.1	0.1	0.1	0.1	0.1	0.1	0.1	0.1	0.1	0.1	0.1	0.1	0.1	0.1	0.1	0.1
11	0.1	0.1	0.1	0.1	0.1	0.1	0.1	0.1	0.1	0.1	0.1	0.1	0.1	0.1	0.1	0.1	0.1	0.1	0.1	0.1	0.1	0.1	0.1	0.1	0.1	0.1	0.1	0.1	0.1	0.1	0.1	0.1	0.1	0.1	0.1	0.1	0.1	0.1	0.1	0.1	0.1	0.1	0.1	0.1	0.1	0.1	0.1	0.1	0.1
3131	0.1	0.1	0.1	0.1	0.1	0.1	0.1	0.1	0.1	0.1	0.1	0.1	0.1	0.1	0.1	0.1	0.1	0.1	0.1	0.1	0.1	0.1	0.1	0.1	0.1	0.1	0.1	0.1	0.1	0.1	0.1	0.1	0.1	0.1	0.1	0.1	0.1	0.1	0.1	0.1	0.1	0.1	0.1	0.1	0.1	0.1	0.1	0.1	0.1
3775	0.1	0.1	0.1	0.1	0.1	0.1	0.1	0.1	0.1	0.1	0.1	0.1	0.1	0.1	0.1	0.1	0.1	0.1	0.1	0.1	0.1	0.1	0.1	0.1	0.1	0.1	0.1	0.1	0.1	0.1	0.1	0.1	0.1	0.1	0.1	0.1	0.1	0.1	0.1	0.1	0.1	0.1	0.1	0.1	0.1	0.1	0.1	0.1	0.1
3130	0.1	0.1	0.1	0.1	0.1	0.1	0.1	0.1	0.1	0.1	0.1	0.1	0.1	0.1	0.1	0.1	0.1	0.1	0.1	0.1	0.1	0.1	0.1	0.1	0.1	0.1	0.1	0.1	0.1	0.1	0.1	0.1	0.1	0.1	0.1	0.1	0.1	0.1	0.1	0.1	0.1	0.1	0.1	0.1	0.1	0.1	0.1	0.1	0.1
3146	0.1	0.1	0.1	0.1	0.1	0.1	0.1	0.1	0.1	0.1	0.1	0.1	0.1	0.1	0.1	0.1	0.1	0.1	0.1	0.1	0.1	0.1	0.1	0.1	0.1	0.1	0.1	0.1	0.1	0.1	0.1	0.1	0.1	0.1	0.1	0.1	0.1	0.1	0.1	0.1	0.1	0.1	0.1	0.1	0.1	0.1	0.1	0.1	0.1
3730	0.1	0.1	0.1	0.1	0.1	0.1	0.1	0.1	0.1	0.1	0.1	0.1	0.1	0.1	0.1	0.1	0.1	0.1	0.1	0.1	0.1	0.1	0.1	0.1	0.1	0.1	0.1	0.1	0.1	0.1	0.1	0.1	0.1	0.1	0.1	0.1	0.1	0.1	0.1	0.1	0.1	0.1	0.1	0.1	0.1	0.1	0.1	0.1	0.1
3196	0.1	0.1	0.1	0.1	0.1	0.1	0.1	0.1	0.1	0.1	0.1	0.1	0.1	0.1	0.1	0.1	0.1	0.1	0.1	0.1	0.1	0.1	0.1	0.1	0.1	0.1	0.1	0.1	0.1	0.1	0.1	0.1	0.1	0.1	0.1	0.1	0.1	0.1	0.1	0.1	0.1	0.1	0.1	0.1	0.1	0.1	0.1	0.1	0.1
3722	0.1	0.1	0.1	0.1	0.1	0.1	0.1	0.1	0.1	0.1	0.1	0.1	0.1	0.1	0.1	0.1	0.1	0.1	0.1	0.1	0.1	0.1	0.1	0.1	0.1	0.1	0.1	0.1	0.1	0.1	0.1	0.1	0.1	0.1	0.1	0.1	0.1	0.1	0.1	0.1	0.1	0.1	0.1	0.1	0.1	0.1	0.1	0.1	0.1
3736	0.1	0.1	0.1	0.1	0.1	0.1	0.1	0.1	0.1	0.1	0.1	0.1	0.1	0.1	0.1	0.1	0.1	0.1	0.1	0.1	0.1	0.1	0.1	0.1	0.1	0.1	0.1	0.1	0.1	0.1	0.1	0.1	0.1	0.1	0.1	0.1	0.1	0.1	0.1	0.1	0.1	0.1	0.1	0.1	0.1	0.1	0.1	0.1	0.1
4335	0.1	0.1	0.1	0.1	0.1	0.1	0.1	0.1	0.1	0.1	0.1	0.1	0.1	0.1	0.1	0.1	0.1	0.1	0.1	0.1	0.1	0.1	0.1	0.1	0.1	0.1	0.1	0.1	0.1	0.1	0.1	0.1	0.1	0.1	0.1	0.1	0.1	0.1	0.1	0.1	0.1	0.1	0.1	0.1	0.1	0.1	0.1	0.1	0.1
3886	0.1	0.1	0.1	0.1	0.1	0.1	0.1	0.1	0.1	0.1	0.1	0.1	0.1	0.1	0.1	0.1	0.1	0.1	0.1	0.1	0.1	0.1	0.1	0.1	0.1	0.1	0.1	0.1	0.1	0.1	0.1	0.1	0.1	0.1	0.1	0.1	0.1	0.1	0.1	0.1	0.1	0.1	0.1	0.1	0.1	0.1	0.1	0.1	0.1
3165	0.1	0.1	0.1	0.1	0.1	0.1	0.1	0.1	0.1	0.1	0.1	0.1	0.1	0.1	0.1	0.1	0.1	0.1	0.1	0.1	0.1	0.1	0.1	0.1	0.1	0.1	0.1	0.1	0.1	0.1	0.1	0.1	0.1	0.1	0.1	0.1	0.1	0.1	0.1	0.1	0.1	0.1	0.1	0.1	0.1	0.1	0.1	0.1	0.1
12	0.1	0.1	0.1	0.1	0.1	0.1	0.1	0.1	0.1	0.1	0.1	0.1	0.1	0.1	0.1	0.1	0.1	0.1	0.1	0.1	0.1	0.1	0.1	0.1	0.1	0.1	0.1	0.1	0.1	0.1	0.1	0.1	0.1	0.1	0.1	0.1	0.1	0.1	0.1	0.1	0.1	0.1	0.1	0.1	0.1	0.1	0.1	0.1	0.1
3716	0.1	0.1	0.1	0.1	0.1	0.1	0.1	0.1	0.1	0.1	0.1	0.1	0.1	0.1	0.1	0.1	0.1	0.1	0.1	0.1	0.1	0.1	0.1	0.1	0.1	0.1	0.1	0.1	0.1	0.1	0.1	0.1	0.1	0.1	0.1	0.1	0.1	0.1	0.1	0.1	0.1	0.1	0.1	0.1	0.1	0.1	0.1	0.1	0.1
3138	0.1	0.1	0.1	0.1	0.1	0.1	0.1	0.1	0.1	0.1	0.1	0.1	0.1	0.1	0.1	0.1	0.1	0.1	0.1	0.1	0.1	0.1	0.1	0.1	0.1	0.1	0.1	0.1	0.1	0.1	0.1	0.1	0.1	0.1	0.1	0.1	0.1	0.1	0.1	0.1	0.1	0.1	0.1	0.1	0.1	0.1	0.1	0.1	0.1
3134	0.1	0.1	0.1	0.1	0.1	0.1	76.3209	0.1	0.1	0.1	0.1	0.1	0.1	0.1	0.1	0.1	0.1	0.1	0.1	0.1	0.1	0.1	0.1	0.1	0.1	0.1	0.1	0.1	0.1	0.1	0.1	0.1	76.1863	0.1	0.1	0.1	0.1	0.1	0.1	0.1	0.1	0.1	0.1	0.1	0.1	0.1	0.1	0.1	0.1
3147	0.1	0.1	0.1	0.1	0.1	0.1	0.1	0.1	0.1	0.1	0.1	0.1	0.1	0.1	0.1	0.1	0.1	0.1	0.1	0.1	0.1	0.1	0.1	0.1	0.1	0.1	0.1	0.1	0.1	0.1	0.1	0.1	0.1	0.1	0.1	0.1	0.1	0.1	0.1	0.1	0.1	0.1	0.1	0.1	0.1	0.1	0.1	0.1	0.1
4261	0.1	0.1	0.1	0.1	0.1	0.1	0.1	0.1	0.1	0.1	0.1	0.1	0.1	0.1	0.1	0.1	0.1	0.1	0.1	0.1	0.1	0.1	0.1	0.1	0.1	0.1	0.1	0.1	0.1	0.1	0.1	0.1	0.1	0.1	0.1	0.1	0.1	0.1	0.1	0.1	0.1	0.1	0.1	0.1	0.1	0.1	0.1	0.1	0.1
10	0.1	0.1	0.1	0.1	0.1	0.1	0.1	0.1	0.1	0.1	0.1	0.1	0.1	0.1	0.1	0.1	0.1	0.1	0.1	0.1	0.1	0.1	0.1	0.1	0.1	0.1	0.1	0.1	0.1	0.1	0.1	0.1	0.1	0.1	0.1	0.1	0.1	0.1	0.1	0.1	0.1	0.1	0.1	0.1	0.1	0.1	0.1	0.1	0.1
[truncated: 582 more columns]

## Sheet: Figure 3d
ID	5347	5354	5350	5348	5627	5609	5683	5678	5662	5358	5360	5625	5657	5643	5666	5691	5636	5361	5363	5699	5618	5599	5629	5620	5630	5357	5614	5697	5690	5703	5638	5619	5709	5621	5617	5631	5649	5704	5702	5694	5624	5623	5715	5713	5701	5626	5706	5369	5598
5347	2742	2489	2479	2495	2222	2195	2174	2163	2246	2187	2218	2206	2206	2176	2219	2225	2163	2176	2214	2227	2230	2215	2210	2222	2241	2223	2221	2197	2196	2238	2215	2214	2211	2226	2222	2195	2216	2226	2223	2223	2201	2201	2214	2212	2205	2202	2198	2210	2228
5354	2489	2742	2548	2576	2311	2266	2251	2238	2321	2262	2285	2281	2281	2243	2292	2280	2254	2243	2265	2256	2253	2240	2237	2265	2282	2264	2274	2240	2237	2265	2254	2255	2228	2265	2263	2220	2285	2251	2252	2276	2212	2212	2233	2235	2246	2243	2231	2259	2255
5350	2479	2548	2742	2592	2285	2288	2279	2266	2311	2290	2295	2293	2293	2243	2312	2302	2222	2231	2281	2238	2225	2210	2249	2257	2276	2236	2270	2236	2233	2273	2246	2247	2222	2253	2247	2238	2253	2225	2226	2298	2240	2240	2221	2223	2240	2239	2227	2227	2247
5348	2495	2576	2592	2742	2293	2314	2291	2278	2331	2310	2345	2289	2289	2285	2336	2334	2286	2279	2257	2312	2291	2276	2261	2251	2270	2300	2244	2280	2277	2261	2280	2281	2268	2277	2269	2278	2329	2277	2280	2308	2244	2244	2261	2263	2262	2281	2269	2283	2291
5627	2222	2311	2285	2293	2742	2577	2584	2565	2622	2573	2586	2614	2614	2576	2579	2543	2537	2536	2560	2531	2530	2517	2486	2520	2535	2521	2537	2503	2500	2530	2511	2510	2513	2522	2518	2517	2550	2484	2475	2499	2465	2465	2540	2536	2477	2494	2494	2494	2476
5609	2195	2266	2288	2314	2577	2742	2635	2620	2585	2628	2625	2617	2617	2591	2634	2566	2532	2571	2523	2526	2521	2506	2521	2461	2478	2492	2482	2512	2507	2489	2496	2499	2504	2541	2547	2528	2559	2491	2482	2518	2518	2518	2517	2517	2502	2517	2499	2487	2505
5683	2174	2251	2279	2291	2584	2635	2742	2705	2560	2631	2594	2594	2594	2580	2613	2547	2511	2534	2510	2523	2506	2491	2514	2474	2489	2507	2473	2503	2500	2478	2491	2490	2501	2522	2522	2523	2532	2478	2471	2529	2517	2517	2510	2508	2491	2498	2486	2482	2494
5678	2163	2238	2266	2278	2565	2620	2705	2742	2545	2610	2581	2579	2579	2563	2598	2526	2492	2511	2493	2498	2487	2472	2493	2451	2466	2490	2462	2482	2479	2459	2474	2473	2484	2501	2503	2504	2511	2457	2454	2512	2502	2502	2491	2489	2472	2477	2473	2465	2473
5662	2246	2321	2311	2331	2622	2585	2560	2545	2742	2587	2632	2634	2634	2606	2617	2549	2543	2548	2576	2523	2528	2517	2494	2512	2521	2505	2515	2519	2512	2534	2507	2506	2497	2508	2506	2487	2566	2518	2507	2497	2477	2477	2494	2492	2489	2522	2480	2526	2538
5358	2187	2262	2290	2310	2573	2628	2631	2610	2587	2742	2631	2607	2607	2599	2646	2574	2536	2595	2559	2508	2499	2484	2505	2485	2500	2528	2470	2528	2527	2485	2490	2491	2512	2511	2517	2510	2563	2483	2474	2550	2514	2514	2513	2513	2502	2505	2497	2475	2521
5360	2218	2285	2295	2345	2586	2625	2594	2581	2632	2631	2742	2634	2634	2596	2671	2577	2559	2590	2566	2533	2530	2515	2526	2470	2483	2543	2479	2527	2524	2488	2529	2526	2523	2526	2524	2521	2594	2526	2519	2525	2515	2515	2520	2518	2517	2518	2500	2508	2556
5625	2206	2281	2293	2289	2614	2617	2594	2579	2634	2607	2634	2742	2742	2578	2615	2523	2519	2562	2556	2497	2506	2493	2486	2488	2501	2511	2495	2471	2472	2494	2493	2492	2473	2464	2470	2503	2548	2462	2455	2481	2471	2471	2464	2462	2463	2480	2450	2480	2498
5657	2206	2281	2293	2289	2614	2617	2594	2579	2634	2607	2634	2742	2742	2578	2615	2523	2519	2562	2556	2497	2506	2493	2486	2488	2501	2511	2495	2471	2472	2494	2493	2492	2473	2464	2470	2503	2548	2462	2455	2481	2471	2471	2464	2462	2463	2480	2450	2480	2498
5643	2176	2243	2243	2285	2576	2591	2580	2563	2606	2599	2596	2578	2578	2742	2609	2569	2559	2524	2540	2515	2542	2557	2512	2524	2507	2519	2479	2537	2534	2496	2515	2518	2537	2536	2536	2537	2570	2526	2517	2503	2495	2495	2534	2530	2509	2558	2514	2532	2514
5666	2219	2292	2312	2336	2579	2634	2613	2598	2617	2646	2671	2615	2615	2609	2742	2588	2558	2571	2577	2522	2519	2504	2549	2477	2492	2530	2498	2542	2537	2509	2520	2519	2546	2547	2547	2544	2585	2513	2504	2552	2526	2526	2533	2529	2526	2539	2517	2499	2541
5691	2225	2280	2302	2334	2543	2566	2547	2526	2549	2574	2577	2523	2523	2569	2588	2742	2556	2559	2571	2558	2559	2544	2575	2561	2574	2570	2518	2604	2599	2561	2558	2555	2570	2565	2563	2574	2587	2527	2518	2570	2556	2556	2551	2545	2578	2573	2563	2551	2561
5636	2163	2254	2222	2286	2537	2532	2511	2492	2543	2536	2559	2519	2519	2559	2558	2556	2742	2597	2601	2536	2537	2552	2513	2517	2498	2532	2492	2518	2517	2489	2510	2509	2514	2501	2501	2528	2599	2523	2514	2506	2480	2480	2509	2505	2490	2535	2521	2519	2533
5361	2176	2243	2231	2279	2536	2571	2534	2511	2548	2595	2590	2562	2562	2524	2571	2559	2597	2742	2598	2515	2518	2505	2478	2462	2473	2531	2477	2519	2518	2486	2509	2508	2501	2484	2492	2501	2598	2486	2475	2515	2499	2499	2494	2492	2501	2518	2510	2504	2540
5363	2214	2265	2281	2257	2560	2523	2510	2493	2576	2559	2566	2556	2556	2540	2577	2571	2601	2598	2742	2527	2512	2499	2522	2540	2551	2531	2527	2547	2546	2572	2511	2508	2529	2512	2514	2533	2596	2496	2487	2525	2499	2499	2524	2520	2525	2514	2540	2494	2550
5699	2227	2256	2238	2312	2531	2526	2523	2498	2523	2508	2533	2497	2497	2515	2522	2558	2536	2515	2527	2742	2625	2610	2617	2559	2574	2630	2554	2596	2591	2561	2598	2595	2594	2605	2603	2626	2555	2585	2572	2562	2552	2552	2597	2591	2556	2571	2579	2609	2607
5618	2230	2253	2225	2291	2530	2521	2506	2487	2528	2499	2530	2506	2506	2542	2519	2559	2537	2518	2512	2625	2742	2727	2610	2576	2587	2631	2565	2611	2608	2578	2609	2610	2621	2600	2600	2621	2546	2578	2563	2571	2561	2561	2620	2620	2569	2602	2608	2608	2626
5599	2215	2240	2210	2276	2517	2506	2491	2472	2517	2484	2515	2493	2493	2557	2504	2544	2552	2505	2499	2610	2727	2742	2595	2591	2572	2616	2552	2596	2593	2565	2594	2595	2606	2585	2585	2606	2531	2593	2578	2556	2546	2546	2605	2605	2554	2617	2593	2595	2611
5629	2210	2237	2249	2261	2486	2521	2514	2493	2494	2505	2526	2486	2486	2512	2549	2575	2513	2478	2522	2617	2610	2595	2742	2568	2583	2591	2579	2601	2594	2560	2607	2604	2601	2604	2600	2615	2510	2548	2533	2573	2593	2593	2606	2596	2565	2588	2570	2598	2604
5620	2222	2265	2257	2251	2520	2461	2474	2451	2512	2485	2470	2488	2488	2524	2477	2561	2517	2462	2540	2559	2576	2591	2568	2742	2723	2591	2573	2589	2586	2600	2553	2552	2579	2564	2562	2589	2494	2558	2543	2561	2553	2553	2560	2554	2533	2604	2566	2556	2542
5630	2241	2282	2276	2270	2535	2478	2489	2466	2521	2500	2483	2501	2501	2507	2492	2574	2498	2473	2551	2574	2587	2572	2583	2723	2742	2604	2588	2604	2599	2617	2566	2569	2594	2579	2575	2602	2507	2539	2524	2576	2566	2566	2575	2567	2552	2585	2581	2567	2555
5357	2223	2264	2236	2300	2521	2492	2507	2490	2505	2528	2543	2511	2511	2519	2530	2570	2532	2531	2531	2630	2631	2616	2591	2591	2604	2742	2552	2602	2597	2551	2592	2591	2610	2579	2579	2618	2543	2567	2554	2590	2560	2560	2583	2581	2560	2581	2593	2595	2607
5614	2221	2274	2270	2244	2537	2482	2473	2462	2515	2470	2479	2495	2495	2479	2498	2518	2492	2477	2527	2554	2565	2552	2579	2573	2588	2552	2742	2594	2591	2607	2576	2577	2596	2585	2579	2594	2481	2527	2512	2560	2556	2556	2589	2583	2560	2563	2573	2565	2535
5697	2197	2240	2236	2280	2503	2512	2503	2482	2519	2528	2527	2471	2471	2537	2542	2604	2518	2519	2547	2596	2611	2596	2601	2589	2604	2602	2594	2742	2729	2655	2632	2631	2650	2633	2629	2630	2551	2593	2580	2616	2618	2618	2617	2611	2648	2621	2657	2599	2615
5690	2196	2237	2233	2277	2500	2507	2500	2479	2512	2527	2524	2472	2472	2534	2537	2599	2517	2518	2546	2591	2608	2593	2594	2586	2599	2597	2591	2729	2742	2646	2623	2622	2639	2626	2624	2629	2552	2592	2575	2609	2615	2615	2616	2614	2639	2612	2652	2594	2610
5703	2238	2265	2273	2261	2530	2489	2478	2459	2534	2485	2488	2494	2494	2496	2509	2561	2489	2486	2572	2561	2578	2565	2560	2600	2617	2551	2607	2655	2646	2742	2597	2598	2609	2608	2602	2593	2524	2564	2549	2575	2579	2579	2598	2592	2619	2580	2632	2566	2578
5638	2215	2254	2246	2280	2511	2496	2491	2474	2507	2490	2529	2493	2493	2515	2520	2558	2510	2509	2511	2598	2609	2594	2607	2553	2566	2592	2576	2632	2623	2597	2742	2735	2620	2611	2609	2596	2533	2605	2588	2590	2610	2610	2611	2609	2604	2585	2621	2645	2635
5619	2214	2255	2247	2281	2510	2499	2490	2473	2506	2491	2526	2492	2492	2518	2519	2555	2509	2508	2508	2595	2610	2595	2604	2552	2569	2591	2577	2631	2622	2598	2735	2742	2619	2612	2610	2595	2532	2606	2589	2591	2611	2611	2612	2610	2601	2586	2620	2648	2636
5709	2211	2228	2222	2268	2513	2504	2501	2484	2497	2512	2523	2473	2473	2537	2546	2570	2514	2501	2529	2594	2621	2606	2601	2579	2594	2610	2596	2650	2639	2609	2620	2619	2742	2633	2629	2640	2515	2585	2570	2578	2592	2592	2647	2643	2616	2615	2643	2591	2601
5621	2226	2265	2253	2277	2522	2541	2522	2501	2508	2511	2526	2464	2464	2536	2547	2565	2501	2484	2512	2605	2600	2585	2604	2564	2579	2579	2585	2633	2626	2608	2611	2612	2633	2742	2730	2621	2536	2622	2607	2597	2629	2629	2678	2670	2611	2586	2612	2608	2594
5617	2222	2263	2247	2269	2518	2547	2522	2503	2506	2517	2524	2470	2470	2536	2547	2563	2501	2492	2514	2603	2600	2585	2600	2562	2575	2579	2579	2629	2624	2602	2609	2610	2629	2730	2742	2619	2534	2618	2603	2599	2629	2629	2674	2668	2607	2588	2610	2612	2596
5631	2195	2220	2238	2278	2517	2528	2523	2504	2487	2510	2521	2503	2503	2537	2544	2574	2528	2501	2533	2626	2621	2606	2615	2589	2602	2618	2594	2630	2629	2593	2596	2595	2640	2621	2619	2742	2545	2575	2560	2584	2598	2598	2625	2619	2576	2595	2613	2603	2569
5649	2216	2285	2253	2329	2550	2559	2532	2511	2566	2563	2594	2548	2548	2570	2585	2587	2599	2598	2596	2555	2546	2531	2510	2494	2507	2543	2481	2551	2552	2524	2533	2532	2515	2536	2534	2545	2742	2560	2549	2535	2509	2509	2532	2528	2527	2526	2528	2532	2546
5704	2226	2251	2225	2277	2484	2491	2478	2457	2518	2483	2526	2462	2462	2526	2513	2527	2523	2486	2496	2585	2578	2593	2548	2558	2539	2567	2527	2593	2592	2564	2605	2606	2585	2622	2618	2575	2560	2742	2717	2563	2597	2597	2604	2600	2585	2594	2580	2592	2608
5702	2223	2252	2226	2280	2475	2482	2471	2454	2507	2474	2519	2455	2455	2517	2504	2518	2514	2475	2487	2572	2563	2578	2533	2543	2524	2554	2512	2580	2575	2549	2588	2589	2570	2607	2603	2560	2549	2717	2742	2552	2582	2582	2589	2583	2574	2577	2571	2575	2591
5694	2223	2276	2298	2308	2499	2518	2529	2512	2497	2550	2525	2481	2481	2503	2552	2570	2506	2515	2525	2562	2571	2556	2573	2561	2576	2590	2560	2616	2609	2575	2590	2591	2578	2597	2599	2584	2535	2563	2552	2742	2600	2600	2577	2577	2572	2597	2593	2549	2599
5624	2201	2212	2240	2244	2465	2518	2517	2502	2477	2514	2515	2471	2471	2495	2526	2556	2480	2499	2499	2552	2561	2546	2593	2553	2566	2560	2556	2618	2615	2579	2610	2611	2592	2629	2629	2598	2509	2597	2582	2600	2742	2742	2605	2599	2592	2579	2587	2587	2601
5623	2201	2212	2240	2244	2465	2518	2517	2502	2477	2514	2515	2471	2471	2495	2526	2556	2480	2499	2499	2552	2561	2546	2593	2553	2566	2560	2556	2618	2615	2579	2610	2611	2592	2629	2629	2598	2509	2597	2582	2600	2742	2742	2605	2599	2592	2579	2587	2587	2601
5715	2214	2233	2221	2261	2540	2517	2510	2491	2494	2513	2520	2464	2464	2534	2533	2551	2509	2494	2524	2597	2620	2605	2606	2560	2575	2583	2589	2617	2616	2598	2611	2612	2647	2678	2674	2625	2532	2604	2589	2577	2605	2605	2742	2730	2603	2576	2628	2608	2592
5713	2212	2235	2223	2263	2536	2517	2508	2489	2492	2513	2518	2462	2462	2530	2529	2545	2505	2492	2520	2591	2620	2605	2596	2554	2567	2581	2583	2611	2614	2592	2609	2610	2643	2670	2668	2619	2528	2600	2583	2577	2599	2599	2730	2742	2595	2570	2624	2602	2590
5701	2205	2246	2240	2262	2477	2502	2491	2472	2489	2502	2517	2463	2463	2509	2526	2578	2490	2501	2525	2556	2569	2554	2565	2533	2552	2560	2560	2648	2639	2619	2604	2601	2616	2611	2607	2576	2527	2585	2574	2572	2592	2592	2603	2595	2742	2581	2625	2569	2607
5626	2202	2243	2239	2281	2494	2517	2498	2477	2522	2505	2518	2480	2480	2558	2539	2573	2535	2518	2514	2571	2602	2617	2588	2604	2585	2581	2563	2621	2612	2580	2585	2586	2615	2586	2588	2595	2526	2594	2577	2597	2579	2579	2576	2570	2581	2742	2586	2582	2584
5706	2198	2231	2227	2269	2494	2499	2486	2473	2480	2497	2500	2450	2450	2514	2517	2563	2521	2510	2540	2579	2608	2593	2570	2566	2581	2593	2573	2657	2652	2632	2621	2620	2643	2612	2610	2613	2528	2580	2571	2593	2587	2587	2628	2624	2625	2586	2742	2588	2604
5369	2210	2259	2227	2283	2494	2487	2482	2465	2526	2475	2508	2480	2480	2532	2499	2551	2519	2504	2494	2609	2608	2595	2598	2556	2567	2595	2565	2599	2594	2566	2645	2648	2591	2608	2612	2603	2532	2592	2575	2549	2587	2587	2608	2602	2569	2582	2588	2742	2604
5598	2228	2255	2247	2291	2476	2505	2494	2473	2538	2521	2556	2498	2498	2514	2541	2561	2533	2540	2550	2607	2626	2611	2604	2542	2555	2607	2535	2615	2610	2578	2635	2636	2601	2594	2596	2569	2546	2608	2591	2599	2601	2601	2592	2590	2607	2584	2604	2604	2742
5705	2246	2271	2247	2261	2524	2467	2452	2437	2546	2465	2506	2518	2518	2468	2503	2505	2527	2502	2542	2559	2582	2569	2546	2564	2575	2589	2581	2573	2564	2598	2579	2578	2585	2544	2544	2547	2508	2558	2545	2553	2521	2521	2552	2550	2541	2570	2578	2546	2588
5359	2204	2253	2251	2291	2546	2545	2518	2495	2504	2525	2530	2488	2488	2514	2547	2567	2505	2502	2502	2595	2590	2575	2592	2552	2565	2591	2581	2605	2598	2566	2571	2568	2599	2590	2588	2617	2508	2522	2505	2585	2545	2545	2592	2592	2549	2590	2578	2552	2552
5693	2197	2268	2280	2308	2537	2564	2543	2528	2499	2536	2537	2499	2499	2507	2568	2562	2518	2505	2505	2580	2553	2538	2557	2523	2540	2566	2548	2566	2557	2541	2540	2539	2590	2579	2577	2602	2507	2521	2514	2548	2526	2526	2575	2571	2550	2543	2573	2529	2535
5696	2195	2266	2278	2304	2537	2564	2543	2524	2499	2538	2539	2499	2499	2507	2570	2564	2518	2507	2507	2580	2553	2538	2559	2523	2540	2568	2550	2566	2557	2539	2542	2541	2590	2579	2577	2602	2507	2521	2512	2550	2528	2528	2575	2571	2552	2543	2573	2529	2537
5700	2197	2260	2272	2310	2537	2560	2545	2524	2503	2536	2541	2497	2497	2511	2570	2562	2510	2501	2499	2580	2557	2542	2557	2523	2538	2564	2544	2566	2561	2539	2544	2543	2590	2579	2575	2602	2503	2519	2512	2548	2530	2530	2575	2575	2542	2545	2575	2531	2533
5680	2198	2265	2275	2313	2544	2565	2542	2523	2506	2543	2546	2502	2502	2516	2577	2567	2519	2508	2506	2591	2564	2549	2568	2532	2549	2577	2555	2577	2568	2548	2551	2550	2601	2588	2584	2613	2508	2524	2513	2551	2535	2535	2586	2582	2549	2554	2584	2538	2540
5681	2196	2265	2273	2313	2542	2561	2538	2521	2502	2541	2542	2500	2500	2514	2573	2563	2517	2506	2504	2587	2564	2549	2566	2530	2547	2575	2551	2575	2566	2548	2549	2548	2599	2584	2580	2611	2506	2520	2511	2549	2531	2531	2584	2580	2549	2552	2582	2536	2538
5685	2195	2264	2270	2310	2543	2564	2541	2522	2505	2542	2545	2501	2501	2517	2576	2564	2518	2507	2505	2588	2565	2550	2567	2531	2546	2576	2552	2574	2567	2545	2552	2551	2602	2585	2583	2612	2507	2523	2512	2552	2534	2534	2585	2583	2548	2557	2583	2539	2541
5687	2196	2265	2275	2313	2542	2565	2542	2523	2506	2543	2546	2502	2502	2516	2575	2565	2519	2508	2506	2589	2564	2549	2564	2532	2547	2577	2553	2575	2568	2546	2551	2550	2601	2586	2584	2613	2508	2524	2513	2553	2535	2535	2582	2582	2547	2554	2582	2538	2540
5686	2198	2265	2275	2313	2540	2565	2542	2525	2506	2541	2546	2502	2502	2514	2575	2565	2517	2506	2504	2587	2564	2549	2566	2530	2545	2575	2553	2573	2568	2544	2549	2548	2597	2584	2582	2611	2506	2524	2511	2549	2535	2535	2584	2584	2547	2552	2582	2538	2540
5682	2197	2266	2278	2314	2539	2562	2541	2524	2505	2542	2545	2501	2501	2513	2572	2560	2514	2503	2501	2588	2561	2546	2565	2527	2544	2572	2552	2572	2563	2543	2550	2549	2596	2583	2579	2608	2503	2519	2508	2548	2534	2534	2581	2579	2548	2549	2579	2537	2539
5639	2205	2260	2266	2294	2517	2550	2537	2516	2497	2530	2535	2487	2487	2525	2560	2572	2516	2501	2525	2586	2577	2562	2581	2549	2564	2580	2538	2582	2575	2559	2554	2553	2596	2595	2597	2628	2535	2545	2532	2554	2546	2546	2585	2587	2562	2555	2573	2557	2553
5646	2224	2243	2243	2297	2506	2539	2522	2503	2524	2535	2544	2528	2528	2512	2539	2541	2491	2522	2476	2587	2580	2565	2558	2524	2539	2579	2547	2581	2572	2550	2593	2594	2583	2574	2580	2587	2506	2574	2557	2555	2585	2585	2562	2560	2557	2566	2554	2584	2590
5652	2221	2244	2244	2298	2507	2540	2523	2504	2525	2536	2547	2531	2531	2511	2542	2540	2492	2523	2477	2586	2579	2564	2557	2525	2540	2580	2550	2580	2571	2549	2594	2595	2584	2575	2581	2588	2507	2573	2556	2558	2586	2586	2561	2559	2556	2569	2553	2583	2589
5698	2223	2250	2264	2296	2513	2524	2523	2510	2515	2522	2527	2497	2497	2523	2558	2554	2486	2501	2501	2576	2579	2566	2587	2533	2548	2570	2594	2610	2603	2575	2588	2587	2596	2597	2593	2598	2493	2547	2538	2586	2576	2576	2589	2591	2586	2595	2571	2587	2567
5648	2204	2263	2269	2291	2524	2553	2524	2501	2508	2521	2534	2494	2494	2524	2559	2569	2501	2494	2494	2595	2588	2573	2612	2550	2565	2581	2591	2597	2594	2558	2583	2582	2589	2588	2586	2615	2510	2526	2511	2581	2543	2543	2578	2576	2545	2586	2570	2570	2558
5642	2207	2264	2274	2294	2521	2554	2521	2500	2507	2520	2535	2495	2495	2521	2556	2566	2498	2489	2489	2594	2587	2572	2613	2549	2564	2578	2590	2596	2593	2555	2580	2579	2588	2585	2583	2614	2507	2523	2508	2578	2544	2544	2577	2575	2544	2585	2567	2567	2557
5635	2201	2262	2268	2290	2525	2552	2521	2498	2503	2522	2531	2493	2493	2523	2554	2568	2502	2495	2491	2598	2587	2572	2613	2549	2566	2580	2594	2598	2593	2559	2582	2583	2590	2589	2585	2616	2511	2523	2508	2578	2542	2542	2581	2577	2546	2585	2573	2571	2555
5644	2203	2260	2268	2290	2523	2554	2521	2498	2505	2522	2533	2493	2493	2525	2556	2570	2500	2493	2493	2596	2587	2572	2613	2551	2566	2580	2590	2598	2595	2559	2584	2585	2590	2589	2587	2616	2511	2525	2510	2578	2544	2544	2579	2577	2546	2585	2573	2571	2557
5641	2204	2263	2273	2293	2518	2557	2522	2497	2504	2523	2532	2494	2494	2520	2553	2565	2499	2494	2490	2593	2584	2569	2610	2548	2563	2577	2587	2595	2592	2554	2579	2580	2587	2584	2584	2613	2510	2522	2507	2579	2545	2545	2574	2572	2543	2584	2568	2566	2556
5647	2204	2261	2269	2293	2526	2555	2524	2501	2508	2523	2536	2496	2496	2524	2559	2571	2501	2494	2494	2597	2588	2573	2612	2552	2567	2581	2591	2599	2596	2560	2583	2582	2591	2590	2588	2617	2510	2526	2511	2581	2545	2545	2580	2578	2547	2588	2572	2568	2558
5637	2201	2260	2268	2290	2523	2554	2521	2498	2505	2522	2533	2493	2493	2523	2556	2568	2502	2495	2493	2594	2585	2570	2611	2549	2564	2578	2590	2598	2595	2559	2584	2585	2588	2587	2585	2614	2511	2525	2510	2580	2544	2544	2577	2575	2546	2587	2573	2569	2557
5634	2180	2225	2237	2279	2522	2515	2506	2489	2498	2501	2508	2474	2474	2542	2527	2543	2529	2476	2494	2587	2588	2603	2570	2562	2543	2567	2577	2605	2600	2556	2565	2566	2589	2592	2590	2623	2494	2566	2553	2557	2549	2549	2604	2600	2547	2606	2574	2570	2534
5695	2182	2229	2247	2273	2484	2529	2524	2507	2472	2489	2494	2468	2468	2476	2501	2517	2465	2476	2458	2543	2546	2531	2546	2500	2513	2521	2547	2565	2558	2528	2541	2542	2555	2566	2568	2581	2464	2514	2505	2531	2567	2567	2564	2568	2545	2536	2548	2538	2522
5633	2202	2245	2249	2293	2520	2523	2518	2495	2514	2499	2514	2476	2476	2526	2537	2549	2513	2484	2488	2585	2584	2585	2578	2554	2551	2561	2573	2603	2594	2564	2571	2572	2591	2604	2606	2625	2492	2558	2545	2561	2551	2551	2600	2598	2559	2604	2580	2590	2546
5632	2199	2242	2246	2290	2521	2520	2515	2492	2511	2498	2511	2477	2477	2525	2534	2548	2516	2487	2491	2588	2587	2588	2577	2553	2550	2564	2576	2602	2597	2563	2570	2571	2590	2601	2603	2628	2493	2555	2542	2558	2550	2550	2601	2599	2558	2603	2579	2593	2545
5640	2210	2261	2245	2299	2516	2527	2488	2469	2498	2485	2522	2474	2474	2480	2515	2549	2519	2490	2484	2603	2586	2571	2594	2528	2541	2575	2571	2581	2572	2546	2601	2604	2573	2574	2574	2589	2520	2550	2535	2547	2545	2545	2564	2562	2533	2548	2562	2600	2564
5645	2210	2261	2245	2299	2516	2527	2488	2469	2498	2485	2522	2474	2474	2480	2515	2549	2519	2490	2484	2603	2586	2571	2594	2528	2541	2575	2571	2581	2572	2546	2601	2604	2573	2574	2574	2589	2520	2550	2535	2547	2545	2545	2564	2562	2533	2548	2562	2600	2564
5707	2211	2254	2274	2294	2531	2552	2531	2508	2503	2526	2537	2485	2485	2503	2550	2570	2510	2505	2521	2608	2583	2568	2603	2545	2560	2578	2588	2608	2599	2581	2586	2583	2596	2605	2603	2618	2519	2541	2528	2592	2562	2562	2593	2591	2578	2569	2587	2559	2559
5674	2245	2292	2256	2316	2471	2476	2485	2466	2453	2452	2483	2445	2445	2427	2482	2418	2428	2435	2405	2476	2463	2448	2455	2395	2412	2452	2412	2434	2429	2423	2450	2451	2444	2463	2457	2454	2443	2437	2432	2470	2428	2428	2453	2457	2422	2421	2427	2425	2459
5679	2232	2273	2235	2293	2444	2481	2478	2457	2436	2455	2456	2448	2448	2402	2455	2399	2411	2454	2388	2461	2450	2437	2444	2388	2401	2439	2393	2415	2408	2406	2435	2434	2425	2450	2450	2445	2426	2426	2419	2447	2427	2427	2442	2446	2399	2422	2404	2428	2440
5689	2244	2279	2239	2299	2438	2445	2430	2411	2454	2425	2472	2432	2432	2460	2469	2435	2471	2440	2412	2427	2450	2457	2454	2408	2401	2425	2423	2421	2414	2410	2473	2474	2437	2432	2430	2431	2450	2444	2437	2445	2429	2429	2426	2420	2403	2466	2416	2468	2450
5675	2246	2293	2267	2309	2438	2461	2452	2429	2464	2457	2492	2440	2440	2438	2499	2457	2467	2456	2426	2443	2454	2441	2464	2396	2409	2433	2423	2445	2440	2424	2459	2460	2435	2440	2436	2439	2468	2436	2433	2481	2439	2439	2418	2416	2425	2438	2424	2440	2474
5676	2239	2272	2238	2308	2423	2464	2455	2436	2447	2464	2483	2461	2461	2409	2472	2420	2444	2461	2413	2444	2439	2426	2433	2391	2404	2428	2394	2444	2443	2425	2454	2451	2434	2435	2441	2434	2451	2445	2440	2444	2462	2462	2421	2419	2414	2421	2417	2437	2459
5688	2219	2258	2214	2280	2407	2436	2439	2418	2405	2448	2447	2443	2443	2389	2438	2370	2424	2441	2391	2426	2419	2404	2403	2347	2366	2426	2402	2400	2403	2389	2448	2449	2416	2403	2407	2408	2407	2407	2402	2410	2408	2408	2413	2411	2396	2377	2401	2427	2433
5692	2216	2257	2215	2281	2402	2435	2430	2411	2398	2443	2446	2442	2442	2384	2437	2363	2421	2440	2388	2421	2410	2395	2396	2340	2359	2421	2401	2391	2392	2384	2439	2442	2413	2398	2402	2403	2410	2398	2397	2411	2401	2401	2406	2404	2391	2372	2398	2418	2426
5653	2222	2231	2239	2269	2410	2475	2460	2439	2426	2467	2448	2450	2450	2450	2469	2419	2409	2450	2430	2443	2442	2429	2448	2400	2413	2433	2401	2435	2432	2424	2437	2436	2437	2440	2440	2447	2436	2404	2395	2455	2445	2445	2434	2430	2409	2440	2428	2416	2438
5650	2273	2300	2272	2330	2447	2470	2459	2440	2461	2454	2493	2445	2445	2427	2486	2416	2436	2427	2407	2472	2477	2462	2477	2381	2394	2458	2424	2420	2415	2397	2468	2465	2430	2451	2445	2440	2459	2431	2428	2458	2410	2410	2439	2441	2394	2425	2407	2437	2455
5651	2271	2300	2270	2328	2447	2470	2459	2440	2459	2452	2491	2445	2445	2425	2486	2416	2438	2427	2405	2472	2479	2464	2479	2383	2396	2458	2426	2420	2415	2401	2470	2469	2432	2453	2447	2442	2461	2429	2426	2458	2410	2410	2443	2445	2394	2425	2407	2439	2461
5667	2254	2281	2265	2339	2432	2471	2458	2435	2466	2469	2498	2464	2464	2426	2481	2427	2443	2468	2422	2457	2462	2447	2430	2376	2391	2443	2391	2439	2432	2430	2451	2450	2425	2434	2430	2423	2462	2434	2427	2465	2467	2467	2420	2416	2413	2436	2416	2412	2482
5671	2264	2301	2315	2333	2438	2461	2454	2439	2418	2441	2452	2406	2406	2414	2469	2443	2397	2390	2400	2485	2468	2453	2506	2426	2441	2451	2477	2465	2460	2456	2483	2482	2477	2502	2494	2495	2408	2444	2441	2485	2469	2469	2494	2494	2451	2450	2462	2458	2452
5677	2271	2316	2274	2338	2437	2442	2435	2412	2439	2428	2469	2413	2413	2399	2456	2434	2430	2435	2403	2488	2471	2458	2455	2399	2412	2462	2442	2448	2441	2441	2480	2479	2466	2487	2479	2468	2437	2463	2460	2466	2432	2432	2483	2487	2452	2433	2453	2467	2481
5684	2268	2313	2269	2329	2430	2407	2422	2403	2416	2429	2450	2398	2398	2404	2441	2423	2439	2424	2398	2475	2470	2455	2470	2412	2427	2481	2457	2453	2444	2432	2489	2490	2471	2456	2446	2457	2432	2448	2441	2473	2455	2455	2462	2460	2429	2438	2454	2474	2480
5655	2251	2302	2266	2324	2413	2406	2389	2370	2417	2404	2447	2391	2391	2415	2440	2422	2430	2405	2385	2442	2445	2460	2435	2411	2394	2428	2412	2442	2437	2437	2468	2467	2422	2427	2421	2428	2421	2449	2440	2460	2416	2416	2421	2419	2416	2461	2427	2433	2461
5670	2268	2317	2283	2341	2430	2425	2408	2389	2430	2423	2466	2408	2408	2398	2459	2441	2417	2422	2402	2461	2462	2447	2454	2398	2413	2447	2429	2461	2456	2454	2487	2486	2441	2446	2440	2447	2440	2434	2427	2479	2435	2435	2438	2436	2435	2446	2446	2448	2480
5612	2268	2317	2283	2341	2430	2425	2408	2389	2430	2423	2466	2408	2408	2398	2459	2441	2417	2422	2402	2461	2462	2447	2454	2398	2413	2447	2429	2461	2456	2454	2487	2486	2441	2446	2440	2447	2440	2434	2427	2479	2435	2435	2438	2436	2435	2446	2446	2448	2480
5665	2267	2316	2282	2340	2431	2426	2409	2390	2431	2424	2467	2409	2409	2399	2460	2442	2418	2423	2403	2462	2463	2448	2455	2399	2414	2448	2430	2462	2457	2455	2488	2487	2442	2447	2441	2448	2441	2435	2428	2480	2436	2436	2439	2437	2436	2447	2447	2449	2481
5669	2271	2320	2286	2344	2431	2428	2409	2390	2431	2424	2467	2409	2409	2399	2460	2442	2418	2423	2403	2462	2463	2448	2455	2399	2414	2448	2430	2462	2457	2457	2488	2487	2442	2447	2441	2448	2443	2435	2428	2480	2436	2436	2439	2437	2438	2449	2447	2449	2481
5664	2269	2318	2284	2342	2431	2426	2409	2390	2431	2424	2467	2409	2409	2399	2460	2442	2418	2423	2403	2462	2463	2448	2455	2399	2414	2448	2430	2462	2457	2455	2488	2487	2442	2447	2441	2448	2441	2435	2428	2480	2436	2436	2439	2437	2436	2447	2447	2449	2481
5659	2250	2301	2265	2323	2414	2407	2390	2371	2418	2405	2448	2392	2392	2416	2441	2423	2431	2406	2386	2443	2446	2461	2436	2412	2395	2429	2413	2443	2438	2438	2469	2468	2423	2428	2422	2429	2422	2450	2441	2461	2417	2417	2420	2418	2417	2460	2428	2432	2462
5660	2251	2302	2266	2324	2413	2406	2389	2370	2417	2404	2447	2391	2391	2415	2440	2422	2430	2405	2385	2442	2445	2460	2435	2411	2394	2428	2412	2442	2437	2437	2468	2467	2422	2427	2421	2428	2421	2449	2440	2460	2416	2416	2419	2417	2416	2459	2427	2431	2461
5661	2252	2305	2269	2327	2418	2411	2394	2375	2420	2409	2452	2396	2396	2414	2445	2427	2431	2410	2390	2445	2448	2459	2438	2410	2397	2431	2415	2445	2440	2442	2471	2470	2425	2430	2424	2431	2426	2446	2439	2463	2419	2419	2422	2422	2419	2458	2432	2434	2464
5613	2270	2321	2285	2343	2426	2423	2406	2389	2426	2419	2460	2406	2406	2396	2457	2435	2413	2418	2398	2453	2456	2441	2446	2390	2409	2441	2423	2453	2448	2452	2479	2482	2433	2438	2432	2439	2436	2428	2425	2475	2427	2427	2430	2428	2433	2438	2440	2442	2472
5362	2287	2322	2312	2314	2451	2438	2445	2424	2465	2420	2459	2471	2471	2377	2438	2412	2386	2423	2421	2418	2403	2388	2385	2397	2412	2392	2404	2392	2387	2429	2402	2401	2386	2397	2395	2396	2411	2403	2400	2424	2422	2422	2377	2377	2392	2395	2381	2379	2435
5398	2229	2250	2250	2284	2405	2456	2461	2440	2395	2444	2437	2415	2415	2429	2456	2452	2406	2415	2413	2462	2445	2430	2477	2427	2444	2446	2434	2468	2461	2459	2466	2469	2480	2479	2473	2488	2419	2435	2430	2466	2520	2520	2469	2463	2448	2431	2461	2449	2461
5672	2243	2270	2266	2306	2431	2450	2457	2440	2407	2432	2441	2399	2399	2435	2470	2462	2400	2389	2415	2486	2467	2452	2497	2433	2450	2452	2438	2466	2461	2455	2464	2463	2488	2497	2487	2504	2421	2435	2430	2462	2468	2468	2489	2489	2448	2427	2465	2453	2453
5673	2246	2273	2271	2311	2430	2449	2456	2437	2410	2437	2442	2400	2400	2436	2471	2467	2405	2392	2418	2485	2468	2453	2498	2434	2451	2451	2439	2467	2460	2456	2465	2466	2489	2496	2486	2503	2424	2434	2431	2467	2471	2471	2490	2490	2449	2426	2462	2456	2456
5654	2261	2280	2278	2254	2429	2432	2425	2402	2423	2422	2395	2437	2437	2391	2422	2418	2366	2389	2431	2442	2423	2412	2455	2459	2472	2412	2448	2428	2421	2467	2426	2427	2450	2455	2453	2458	2379	2405	2400	2426	2450	2450	2453	2449	2408	2403	2423	2429	2421
5656	2262	2281	2279	2255	2430	2435	2428	2405	2424	2423	2396	2438	2438	2392	2423	2421	2365	2390	2430	2445	2426	2413	2458	2460	2475	2413	2449	2431	2424	2468	2429	2430	2451	2458	2456	2461	2382	2406	2401	2429	2453	2453	2454	2450	2409	2404	2424	2432	2422
5658	2259	2280	2278	2254	2425	2430	2423	2400	2421	2418	2391	2433	2433	2387	2420	2416	2364	2387	2429	2442	2423	2410	2453	2457	2472	2410	2446	2432	2425	2467	2426	2427	2446	2455	2453	2458	2381	2403	2398	2428	2452	2452	2449	2445	2406	2405	2423	2427	2419
5610	2260	2277	2279	2255	2412	2419	2412	2389	2410	2407	2382	2422	2422	2376	2409	2405	2355	2378	2416	2433	2414	2401	2442	2444	2459	2401	2435	2421	2414	2456	2417	2418	2435	2444	2442	2447	2372	2394	2389	2419	2441	2441	2438	2434	2397	2394	2414	2418	2412
5353	2269	2292	2254	2358	2343	2332	2327	2312	2363	2340	2375	2343	2343	2351	2366	2374	2352	2329	2341	2390	2375	2360	2341	2301	2316	2368	2312	2388	2389	2363	2382	2379	2368	2363	2353	2372	2403	2371	2366	2348	2342	2342	2365	2365	2378	2327	2375	2363	2381
5370	2297	2334	2296	2392	2347	2368	2341	2322	2387	2346	2397	2341	2341	2357	2386	2396	2344	2327	2315	2356	2365	2350	2327	2297	2312	2334	2306	2348	2345	2325	2342	2339	2342	2347	2341	2336	2393	2351	2344	2346	2312	2312	2335	2333	2356	2349	2337	2351	2361
5376	2243	2238	2196	2282	2223	2218	2247	2228	2239	2234	2279	2221	2221	2221	2272	2274	2228	2233	2227	2272	2253	2238	2231	2195	2210	2252	2192	2248	2247	2215	2246	2243	2232	2225	2223	2234	2271	2235	2232	2236	2232	2232	2227	2221	2250	2205	2237	2229	2251
6401	2239	2228	2212	2278	2145	2164	2165	2154	2169	2172	2215	2159	2159	2129	2206	2182	2190	2173	2149	2126	2127	2112	2143	2081	2096	2122	2108	2126	2125	2099	2146	2143	2102	2107	2099	2106	2209	2121	2126	2150	2124	2124	2087	2089	2146	2123	2121	2121	2141
6400	2222	2205	2193	2269	2140	2179	2186	2173	2166	2187	2220	2174	2174	2132	2203	2165	2177	2186	2140	2113	2116	2101	2116	2072	2087	2115	2083	2121	2122	2090	2119	2118	2097	2098	2090	2101	2192	2108	2113	2141	2157	2157	2080	2082	2127	2114	2112	2098	2132
6395	2244	2231	2217	2289	2164	2175	2184	2175	2186	2191	2234	2176	2176	2148	2223	2191	2201	2184	2166	2139	2142	2127	2152	2100	2115	2141	2117	2147	2146	2118	2157	2154	2123	2122	2114	2127	2214	2130	2135	2163	2141	2141	2106	2108	2153	2140	2144	2132	2156
6394	2217	2196	2188	2260	2137	2174	2183	2170	2161	2180	2213	2169	2169	2123	2192	2166	2174	2181	2139	2108	2115	2100	2115	2073	2088	2110	2084	2116	2117	2089	2116	2113	2090	2091	2083	2094	2189	2107	2112	2134	2150	2150	2077	2077	2132	2109	2113	2095	2129
6393	2246	2223	2213	2237	2164	2153	2162	2147	2190	2159	2192	2196	2196	2106	2173	2145	2155	2160	2166	2085	2092	2079	2088	2100	2113	2089	2105	2095	2096	2116	2091	2088	2069	2072	2064	2073	2172	2090	2095	2115	2129	2129	2054	2054	2111	2088	2088	2074	2106
6399	2266	2245	2227	2259	2180	2153	2158	2147	2206	2163	2202	2196	2196	2120	2193	2163	2177	2160	2186	2107	2112	2099	2112	2120	2133	2107	2125	2113	2112	2134	2111	2108	2087	2090	2082	2091	2192	2108	2113	2135	2113	2113	2074	2074	2129	2108	2108	2092	2128
6398	2239	2226	2216	2298	2163	2174	2185	2176	2187	2200	2233	2173	2173	2151	2224	2198	2200	2191	2167	2138	2141	2126	2133	2105	2120	2148	2104	2152	2153	2121	2144	2141	2120	2121	2113	2130	2223	2129	2134	2174	2140	2140	2103	2105	2150	2139	2143	2121	2149
6397	2241	2226	2210	2292	2165	2178	2185	2174	2187	2194	2237	2177	2177	2151	2226	2192	2206	2185	2167	2142	2141	2126	2145	2099	2114	2140	2108	2148	2147	2117	2148	2145	2124	2125	2117	2128	2217	2131	2136	2166	2144	2144	2107	2109	2154	2141	2141	2123	2157
6396	2215	2194	2202	2268	2143	2188	2187	2172	2163	2202	2219	2181	2181	2131	2198	2164	2172	2197	2143	2120	2117	2102	2103	2067	2082	2120	2080	2120	2119	2091	2124	2121	2090	2097	2093	2106	2199	2111	2116	2148	2144	2144	2083	2085	2128	2109	2111	2091	2135
6362	1988	1971	1975	2049	1796	1789	1816	1817	1806	1805	1840	1784	1784	1772	1825	1819	1789	1792	1778	1797	1778	1767	1764	1732	1747	1775	1765	1797	1800	1778	1807	1808	1771	1778	1770	1777	1810	1796	1809	1821	1787	1787	1768	1776	1817	1776	1798	1768	1808
6385	1987	1968	1974	2044	1791	1794	1817	1818	1803	1804	1833	1789	1789	1775	1824	1820	1792	1793	1779	1796	1775	1764	1763	1733	1748	1782	1764	1790	1795	1777	1804	1805	1762	1777	1771	1774	1815	1793	1806	1818	1782	1782	1767	1773	1820	1775	1793	1775	1803
6374	2002	1981	1983	2059	1796	1799	1816	1817	1810	1807	1840	1788	1788	1776	1829	1823	1797	1800	1782	1799	1780	1769	1766	1734	1749	1781	1765	1795	1798	1780	1809	1810	1769	1780	1774	1771	1824	1800	1813	1823	1785	1785	1768	1776	1823	1782	1798	1772	1810
6387	1990	1967	1969	2045	1792	1787	1806	1807	1802	1797	1832	1778	1778	1768	1821	1815	1791	1788	1774	1797	1774	1763	1762	1732	1747	1777	1759	1791	1794	1776	1805	1806	1765	1774	1766	1767	1814	1794	1807	1815	1781	1781	1762	1770	1815	1776	1794	1764	1804
6384	1997	1988	1980	2054	1793	1798	1823	1824	1811	1808	1845	1789	1789	1773	1834	1826	1802	1801	1791	1802	1783	1770	1771	1743	1760	1790	1766	1802	1805	1781	1808	1809	1770	1781	1775	1774	1821	1799	1812	1824	1788	1788	1767	1773	1824	1777	1801	1775	1811
6377	1981	1966	1972	2040	1779	1786	1811	1812	1797	1804	1829	1777	1777	1765	1818	1806	1784	1785	1771	1792	1771	1760	1759	1725	1740	1778	1752	1784	1789	1767	1792	1793	1758	1767	1761	1766	1805	1789	1802	1814	1778	1778	1755	1763	1812	1769	1783	1763	1801
6368	1991	1976	1970	2012	1825	1798	1823	1822	1839	1808	1835	1821	1821	1777	1826	1794	1808	1797	1809	1768	1755	1748	1741	1753	1764	1758	1764	1770	1773	1781	1774	1777	1742	1749	1743	1742	1821	1777	1790	1792	1766	1766	1727	1735	1794	1755	1767	1749	1779
6369	1996	1979	1981	2051	1800	1809	1828	1829	1812	1813	1846	1792	1792	1782	1837	1833	1811	1800	1790	1809	1788	1777	1782	1752	1767	1789	1771	1807	1810	1790	1817	1820	1777	1792	1786	1779	1826	1808	1821	1833	1805	1805	1770	1778	1829	1786	1810	1788	1820
6363	1986	1961	1965	2037	1814	1823	1844	1845	1834	1829	1860	1808	1808	1810	1851	1809	1829	1816	1800	1795	1774	1779	1758	1740	1739	1771	1757	1789	1792	1774	1797	1798	1763	1772	1766	1765	1838	1816	1829	1817	1783	1783	1752	1760	1815	1790	1788	1762	1804
6365	1999	1988	1984	2028	1809	1786	1807	1808	1825	1790	1825	1807	1807	1779	1818	1808	1810	1787	1805	1782	1765	1768	1759	1771	1772	1764	1778	1782	1785	1799	1790	1793	1758	1763	1757	1762	1809	1797	1810	1806	1778	1778	1747	1755	1808	1777	1785	1771	1795
6364	1977	1954	1964	1996	1805	1802	1825	1824	1827	1808	1827	1821	1821	1767	1814	1770	1786	1803	1789	1756	1737	1738	1721	1735	1738	1738	1746	1752	1755	1765	1756	1757	1724	1731	1725	1728	1801	1771	1784	1776	1772	1772	1713	1721	1776	1751	1749	1723	1761
6366	1973	1950	1960	1992	1807	1804	1821	1820	1825	1808	1825	1823	1823	1773	1810	1770	1788	1803	1789	1748	1727	1732	1711	1733	1732	1728	1744	1746	1749	1765	1756	1757	1716	1729	1723	1720	1797	1769	1782	1768	1770	1770	1711	1719	1774	1743	1747	1719	1757
6367	2009	1992	1996	2036	1815	1786	1813	1814	1835	1798	1831	1809	1809	1783	1820	1812	1810	1785	1807	1794	1775	1780	1771	1779	1778	1772	1780	1788	1791	1803	1798	1801	1762	1769	1763	1766	1809	1809	1822	1818	1790	1790	1751	1759	1810	1787	1791	1775	1807
6381	1997	1984	1984	2056	1801	1800	1821	1822	1813	1810	1843	1791	1791	1779	1832	1824	1804	1801	1789	1810	1787	1776	1769	1741	1756	1792	1768	1802	1807	1785	1814	1815	1770	1785	1777	1780	1827	1805	1818	1826	1794	1794	1771	1779	1826	1783	1801	1781	1813
6380	1998	1987	1987	2057	1808	1803	1828	1829	1820	1817	1850	1796	1796	1786	1837	1831	1809	1808	1794	1813	1792	1781	1776	1748	1763	1799	1775	1809	1814	1788	1819	1820	1775	1790	1782	1787	1830	1808	1821	1831	1799	1799	1780	1788	1829	1784	1806	1786	1820
6373	1975	1966	1964	2034	1791	1786	1817	1818	1807	1806	1837	1783	1783	1777	1828	1812	1796	1795	1781	1800	1781	1768	1765	1731	1748	1784	1760	1792	1797	1773	1802	1803	1770	1773	1765	1782	1819	1793	1806	1818	1786	1786	1765	1773	1812	1769	1791	1769	1807
6370	1976	1967	1965	2035	1792	1787	1818	1819	1808	1807	1838	1784	1784	1778	1829	1813	1797	1796	1782	1801	1782	1769	1766	1732	1749	1785	1761	1793	1798	1774	1803	1804	1771	1774	1766	1783	1820	1794	1807	1819	1787	1787	1766	1774	1813	1770	1792	1770	1808
6372	1989	1980	1978	2050	1797	1792	1823	1824	1813	1812	1843	1789	1789	1775	1828	1818	1800	1797	1785	1808	1787	1774	1771	1733	1750	1786	1766	1798	1803	1779	1808	1809	1772	1779	1771	1780	1823	1803	1816	1824	1792	1792	1769	1777	1820	1777	1799	1775	1813
6383	1997	1984	1982	2058	1799	1800	1821	1822	1811	1808	1843	1793	1793	1783	1836	1824	1806	1807	1791	1808	1783	1770	1769	1737	1754	1786	1768	1800	1805	1783	1812	1813	1776	1783	1775	1788	1831	1801	1814	1824	1792	1792	1773	1781	1824	1779	1799	1779	1811
6379	1981	1968	1966	2038	1811	1816	1837	1838	1829	1826	1861	1805	1805	1793	1848	1806	1812	1809	1795	1792	1773	1762	1759	1731	1746	1776	1750	1788	1791	1771	1798	1799	1762	1769	1761	1764	1837	1795	1808	1816	1782	1782	1753	1761	1810	1773	1787	1759	1801
6382	1982	1969	1969	2039	1816	1821	1844	1843	1834	1831	1866	1810	1810	1798	1853	1811	1813	1814	1798	1795	1776	1765	1764	1734	1749	1781	1755	1793	1796	1776	1803	1804	1765	1776	1766	1769	1840	1798	1811	1821	1787	1787	1758	1766	1815	1776	1790	1764	1806
6371	2002	1987	1985	2057	1840	1837	1860	1861	1852	1849	1884	1834	1834	1816	1869	1825	1837	1834	1824	1811	1792	1781	1776	1748	1763	1799	1779	1809	1814	1796	1819	1820	1777	1790	1782	1785	1864	1810	1823	1831	1799	1799	1780	1788	1833	1788	1808	1788	1818
6378	2001	1986	1984	2056	1839	1836	1859	1860	1851	1848	1883	1833	1833	1815	1868	1824	1836	1833	1823	1810	1791	1780	1775	1747	1762	1798	1778	1808	1813	1795	1818	1819	1776	1789	1781	1784	1863	1809	1822	1830	1798	1798	1779	1787	1832	1787	1807	1787	1817
6375	1984	1973	1971	2043	1824	1821	1844	1845	1832	1831	1866	1814	1814	1800	1853	1813	1821	1822	1806	1799	1778	1767	1760	1730	1745	1781	1761	1793	1798	1778	1805	1806	1763	1776	1768	1769	1848	1796	1809	1817	1785	1785	1764	1772	1817	1774	1794	1770	1802
6386	1985	1980	1976	2046	1827	1824	1849	1850	1837	1836	1871	1819	1819	1805	1858	1816	1826	1825	1809	1800	1779	1768	1765	1735	1750	1786	1764	1796	1801	1781	1808	1809	1764	1779	1771	1772	1851	1797	1810	1820	1788	1788	1767	1775	1820	1775	1795	1775	1805
6376	1985	1978	1976	2046	1827	1824	1849	1850	1837	1836	1871	1819	1819	1805	1858	1816	1824	1825	1809	1800	1779	1768	1765	1733	1748	1786	1764	1796	1801	1781	1808	1809	1764	1779	1771	1772	1851	1797	1810	1820	1788	1788	1767	1775	1820	1775	1795	1775	1805
5383	2039	2068	2020	2118	1897	1894	1899	1890	1897	1880	1925	1871	1871	1863	1906	1912	1894	1881	1865	1896	1877	1862	1839	1829	1846	1872	1848	1894	1889	1873	1878	1877	1870	1871	1863	1860	1919	1887	1900	1892	1858	1858	1853	1859	1888	1871	1891	1859	1873
5399	2070	2071	2039	2079	1906	1891	1878	1867	1932	1881	1908	1918	1918	1850	1891	1861	1873	1890	1900	1829	1838	1825	1792	1828	1843	1817	1833	1829	1826	1860	1815	1814	1819	1808	1802	1807	1902	1834	1847	1843	1813	1813	1788	1794	1827	1828	1824	1798	1832
5404	2037	2058	2044	2112	1889	1902	1907	1904	1909	1914	1947	1895	1895	1877	1932	1902	1910	1901	1889	1864	1865	1850	1855	1821	1838	1860	1842	1866	1865	1849	1878	1879	1848	1845	1837	1844	1933	1859	1874	1892	1860	1860	1831	1837	1880	1857	1871	1851	1879
5423	1880	1861	1861	1901	1684	1655	1664	1657	1722	1675	1704	1694	1694	1662	1685	1657	1687	1680	1672	1605	1610	1623	1584	1636	1623	1607	1609	1617	1616	1634	1605	1604	1585	1590	1582	1583	1690	1636	1647	1641	1603	1603	1570	1574	1623	1638	1604	1582	1622
3102	1853	1844	1854	1920	1661	1672	1687	1682	1693	1692	1719	1669	1669	1649	1700	1676	1684	1695	1643	1618	1623	1614	1615	1583	1594	1622	1602	1634	1633	1609	1638	1637	1604	1603	1593	1600	1707	1625	1636	1662	1636	1636	1583	1587	1640	1631	1619	1611	1641
5382	1853	1844	1854	1920	1661	1672	1687	1682	1693	1692	1719	1669	1669	1649	1700	1676	1684	1695	1643	1618	1623	1614	1615	1583	1594	1622	1602	1634	1633	1609	1638	1637	1604	1603	1593	1600	1707	1625	1636	1662	1636	1636	1583	1587	1640	1631	1619	1611	1641
5426	1896	1863	1881	1961	1692	1713	1720	1717	1714	1731	1762	1704	1704	1682	1741	1715	1709	1724	1686	1663	1658	1643	1636	1614	1631	1663	1623	1669	1668	1648	1665	1664	1643	1640	1632	1639	1746	1658	1669	1703	1669	1669	1624	1628	1679	1658	1662	1622	1676
3107	1884	1855	1867	1947	1686	1707	1710	1705	1712	1723	1754	1698	1698	1706	1733	1701	1723	1714	1676	1653	1650	1661	1626	1632	1621	1651	1609	1657	1656	1640	1653	1650	1627	1630	1622	1625	1730	1678	1689	1691	1657	1657	1612	1616	1669	1674	1652	1612	1664
5386	1910	1881	1889	1979	1704	1717	1724	1723	1722	1739	1764	1710	1710	1688	1751	1727	1723	1726	1696	1675	1670	1655	1648	1622	1639	1673	1635	1683	1682	1660	1675	1674	1653	1654	1648	1649	1754	1666	1679	1713	1661	1661	1636	1640	1689	1668	1674	1636	1688
5368	1903	1872	1878	1970	1703	1718	1721	1716	1725	1738	1767	1711	1711	1693	1748	1724	1718	1727	1693	1674	1669	1654	1643	1625	1642	1674	1628	1680	1679	1659	1672	1671	1652	1651	1643	1650	1755	1667	1678	1708	1666	1666	1635	1639	1686	1669	1673	1633	1681
5397	1902	1871	1877	1969	1702	1717	1722	1717	1724	1737	1766	1710	1710	1692	1747	1723	1717	1726	1692	1673	1668	1653	1642	1624	1641	1673	1627	1679	1678	1658	1671	1670	1651	1650	1642	1649	1754	1666	1677	1707	1665	1665	1634	1638	1685	1668	1672	1632	1680
5431	1839	1810	1820	1900	1635	1654	1659	1654	1665	1676	1701	1649	1649	1651	1684	1652	1674	1675	1631	1602	1601	1608	1575	1579	1572	1602	1562	1608	1607	1589	1604	1603	1582	1583	1577	1580	1687	1625	1636	1642	1608	1608	1563	1567	1616	1629	1601	1573	1615
5436	1842	1813	1825	1905	1640	1659	1664	1659	1670	1681	1706	1654	1654	1652	1689	1657	1677	1680	1636	1607	1604	1609	1580	1582	1577	1607	1567	1613	1612	1594	1609	1608	1587	1588	1580	1585	1692	1628	1639	1647	1613	1613	1568	1572	1621	1630	1606	1576	1620
5437	1845	1824	1828	1906	1649	1668	1673	1668	1679	1688	1713	1661	1661	1663	1696	1666	1688	1687	1643	1616	1615	1622	1589	1591	1584	1614	1574	1622	1621	1603	1616	1615	1594	1595	1589	1592	1699	1639	1650	1654	1618	1618	1577	1581	1630	1641	1615	1587	1629
5384	1839	1816	1818	1898	1645	1666	1671	1666	1675	1688	1711	1659	1659	1663	1692	1662	1684	1685	1639	1612	1611	1618	1585	1587	1580	1610	1570	1618	1617	1599	1612	1611	1590	1591	1585	1588	1695	1635	1646	1650	1618	1618	1573	1577	1626	1635	1611	1581	1625
5385	1877	1846	1856	1888	1669	1644	1653	1648	1703	1664	1691	1687	1687	1643	1670	1638	1664	1667	1667	1588	1587	1598	1563	1623	1612	1590	1594	1594	1593	1623	1590	1589	1568	1569	1561	1568	1675	1617	1628	1628	1596	1596	1549	1553	1604	1621	1587	1561	1601
5432	1885	1860	1864	1896	1685	1658	1667	1662	1719	1680	1707	1699	1699	1643	1688	1656	1668	1681	1681	1606	1603	1600	1579	1623	1626	1606	1610	1612	1611	1639	1608	1607	1586	1587	1579	1584	1691	1619	1630	1646	1610	1610	1567	1571	1620	1623	1605	1577	1619
5433	1873	1842	1854	1886	1665	1640	1649	1644	1697	1662	1687	1679	1679	1639	1670	1638	1664	1663	1661	1588	1585	1596	1561	1617	1606	1588	1590	1594	1593	1619	1590	1589	1568	1569	1561	1566	1673	1615	1626	1628	1594	1594	1549	1553	1602	1619	1587	1559	1601
5329	1868	1835	1849	1875	1660	1631	1642	1637	1692	1653	1678	1678	1678	1632	1659	1627	1653	1652	1656	1577	1576	1587	1552	1614	1603	1579	1583	1583	1582	1614	1579	1578	1557	1558	1550	1557	1662	1604	1615	1617	1585	1585	1538	1542	1591	1608	1576	1548	1590
5430	1867	1836	1848	1882	1659	1638	1647	1644	1691	1662	1685	1675	1675	1631	1666	1634	1656	1659	1657	1586	1579	1586	1559	1605	1600	1584	1590	1592	1591	1615	1588	1587	1566	1567	1559	1564	1669	1607	1618	1624	1594	1594	1547	1551	1600	1607	1585	1555	1599
5381	1870	1837	1849	1873	1660	1629	1640	1635	1694	1651	1676	1678	1678	1632	1657	1625	1651	1652	1656	1575	1576	1587	1550	1614	1603	1577	1583	1581	1580	1614	1577	1576	1555	1556	1550	1555	1662	1604	1615	1615	1583	1583	1536	1540	1591	1610	1574	1550	1588
3101	1870	1837	1849	1873	1660	1629	1640	1635	1694	1651	1676	1678	1678	1632	1657	1625	1651	1652	1656	1575	1576	1587	1550	1614	1603	1577	1583	1581	1580	1614	1577	1576	1555	1556	1550	1555	1662	1604	1615	1615	1583	1583	1536	1540	1591	1610	1574	1550	1588
5406	1874	1843	1857	1883	1668	1639	1646	1641	1702	1659	1686	1686	1686	1640	1667	1637	1661	1662	1664	1585	1584	1595	1560	1622	1611	1587	1591	1591	1590	1622	1587	1586	1565	1566	1558	1565	1670	1612	1623	1625	1593	1593	1546	1550	1601	1618	1584	1558	1598
5435	1839	1808	1822	1900	1633	1654	1661	1656	1667	1676	1701	1651	1651	1649	1684	1654	1672	1677	1631	1602	1599	1606	1577	1579	1574	1604	1562	1608	1607	1589	1604	1603	1582	1583	1575	1582	1687	1623	1634	1642	1608	1608	1563	1567	1618	1629	1601	1575	1615
5428	1888	1857	1871	1899	1682	1653	1662	1657	1712	1673	1700	1698	1698	1646	1681	1653	1669	1674	1676	1601	1598	1603	1576	1628	1625	1603	1605	1607	1606	1636	1603	1602	1581	1580	1572	1581	1686	1618	1629	1641	1609	1609	1564	1568	1617	1626	1600	1574	1614
5372	1884	1855	1869	1895	1680	1651	1656	1651	1710	1669	1698	1698	1698	1652	1677	1647	1673	1670	1678	1595	1594	1607	1570	1636	1623	1597	1603	1601	1600	1634	1597	1596	1575	1576	1568	1575	1682	1626	1637	1635	1601	1601	1558	1562	1613	1628	1594	1566	1608
5440	1872	1843	1857	1883	1668	1637	1644	1639	1700	1657	1684	1682	1682	1626	1665	1637	1651	1660	1662	1585	1580	1583	1558	1610	1609	1585	1591	1591	1590	1622	1587	1586	1565	1564	1556	1563	1670	1600	1611	1625	1591	1591	1546	1550	1601	1606	1584	1556	1598
5439	1886	1857	1863	1899	1676	1651	1658	1653	1708	1673	1702	1696	1696	1656	1681	1649	1675	1672	1676	1597	1598	1609	1574	1630	1619	1601	1601	1603	1602	1630	1599	1598	1577	1578	1572	1577	1684	1624	1635	1637	1601	1601	1558	1562	1613	1628	1596	1570	1610
5356	1862	1829	1839	1877	1654	1625	1632	1629	1688	1651	1680	1670	1670	1616	1659	1629	1641	1652	1654	1575	1574	1573	1554	1594	1597	1581	1577	1583	1582	1606	1579	1578	1557	1556	1548	1555	1664	1588	1599	1615	1571	1571	1538	1542	1593	1596	1576	1552	1590
5438	1875	1848	1860	1888	1665	1640	1647	1648	1701	1660	1691	1685	1685	1641	1670	1638	1664	1665	1667	1586	1585	1596	1563	1621	1610	1590	1594	1592	1591	1621	1590	1587	1566	1567	1559	1566	1675	1615	1626	1626	1590	1590	1547	1551	1606	1619	1585	1561	1599
5434	1871	1838	1848	1880	1663	1632	1639	1636	1701	1654	1683	1683	1683	1629	1662	1630	1648	1657	1663	1578	1575	1580	1555	1609	1606	1582	1586	1584	1583	1617	1580	1579	1558	1559	1551	1558	1667	1601	1610	1618	1578	1578	1541	1545	1596	1605	1579	1555	1589
5429	1866	1831	1845	1873	1654	1627	1638	1635	1688	1649	1676	1674	1674	1626	1655	1623	1647	1650	1654	1571	1570	1579	1548	1606	1597	1575	1579	1577	1576	1608	1573	1572	1551	1552	1544	1551	1660	1598	1609	1611	1579	1579	1532	1536	1589	1600	1570	1544	1584
5427	1880	1849	1863	1893	1674	1645	1652	1649	1710	1667	1696	1694	1694	1622	1675	1643	1645	1670	1674	1591	1588	1577	1568	1604	1617	1595	1599	1597	1596	1628	1593	1592	1571	1572	1564	1571	1678	1594	1605	1631	1597	1597	1552	1556	1607	1600	1590	1566	1604
5355	1868	1837	1849	1885	1662	1639	1650	1647	1694	1661	1688	1674	1674	1640	1671	1639	1665	1664	1658	1589	1584	1595	1562	1612	1601	1589	1587	1595	1594	1616	1591	1590	1569	1570	1562	1567	1672	1614	1625	1627	1595	1595	1550	1554	1603	1620	1588	1560	1600
5412	1960	1927	1929	2011	1750	1767	1774	1769	1772	1773	1804	1758	1758	1732	1793	1751	1757	1754	1726	1711	1718	1703	1688	1658	1675	1711	1677	1715	1712	1698	1715	1714	1699	1704	1702	1685	1792	1720	1731	1755	1699	1699	1680	1686	1731	1718	1712	1682	1728
5375	1915	1882	1880	1966	1713	1722	1725	1720	1731	1724	1767	1713	1713	1689	1756	1716	1716	1711	1687	1668	1673	1658	1647	1615	1632	1670	1632	1678	1675	1655	1674	1673	1656	1661	1653	1644	1755	1677	1688	1706	1654	1654	1641	1645	1688	1673	1669	1637	1681
5418	1887	1856	1862	1936	1687	1708	1711	1706	1705	1704	1743	1695	1695	1663	1724	1686	1686	1695	1659	1638	1645	1630	1617	1585	1602	1638	1610	1646	1643	1627	1642	1641	1626	1631	1625	1612	1731	1653	1664	1678	1644	1644	1613	1617	1666	1641	1639	1605	1655
5417	1919	1886	1880	1968	1715	1724	1727	1724	1733	1726	1767	1713	1713	1691	1756	1718	1718	1713	1687	1670	1675	1660	1649	1617	1634	1670	1636	1682	1679	1659	1676	1675	1658	1663	1655	1646	1755	1681	1692	1706	1656	1656	1645	1649	1692	1673	1673	1641	1683
5420	1905	1880	1868	1956	1711	1720	1723	1720	1729	1722	1765	1711	1711	1687	1754	1714	1714	1709	1685	1666	1671	1656	1645	1613	1630	1668	1632	1676	1673	1653	1672	1671	1654	1659	1651	1642	1753	1675	1686	1704	1652	1652	1639	1643	1686	1671	1667	1635	1677
5421	1910	1877	1873	1961	1706	1715	1718	1715	1724	1717	1760	1706	1706	1682	1749	1709	1709	1704	1680	1661	1666	1651	1640	1608	1625	1663	1627	1671	1668	1648	1667	1666	1649	1654	1646	1637	1748	1670	1681	1699	1647	1647	1634	1638	1681	1666	1662	1630	1674
5371	1910	1877	1875	1961	1706	1715	1718	1713	1724	1717	1760	1706	1706	1682	1749	1709	1709	1704	1680	1661	1666	1651	1640	1608	1625	1663	1625	1671	1668	1648	1667	1666	1649	1654	1646	1637	1748	1670	1681	1699	1647	1647	1634	1638	1681	1666	1662	1630	1674
5419	1917	1884	1882	1968	1713	1722	1725	1722	1731	1724	1765	1711	1711	1689	1754	1716	1716	1711	1685	1668	1673	1658	1647	1613	1630	1668	1632	1678	1675	1655	1672	1671	1654	1659	1651	1642	1753	1677	1688	1704	1652	1652	1641	1645	1688	1671	1669	1637	1681
5410	1954	1933	1931	2015	1760	1775	1778	1773	1780	1777	1818	1766	1766	1742	1805	1761	1767	1758	1734	1721	1724	1709	1698	1668	1685	1719	1685	1725	1722	1706	1727	1726	1707	1714	1706	1695	1804	1730	1741	1761	1709	1709	1692	1698	1741	1722	1722	1688	1732
5414	1918	1889	1885	1967	1708	1727	1732	1729	1728	1725	1766	1716	1716	1692	1751	1713	1715	1710	1684	1665	1672	1659	1644	1614	1629	1667	1627	1675	1672	1654	1673	1672	1649	1662	1660	1639	1750	1676	1687	1709	1657	1657	1636	1642	1687	1672	1666	1638	1682
5422	1905	1874	1876	1960	1709	1718	1723	1720	1727	1718	1763	1711	1711	1687	1748	1708	1712	1707	1681	1664	1667	1652	1641	1611	1628	1666	1630	1672	1669	1651	1672	1671	1652	1657	1649	1640	1749	1671	1682	1702	1652	1652	1635	1641	1682	1667	1665	1633	1675
5409	1928	1899	1901	1985	1724	1745	1750	1745	1748	1743	1786	1734	1734	1710	1767	1729	1733	1732	1700	1685	1690	1675	1662	1634	1651	1685	1653	1691	1688	1670	1691	1690	1673	1678	1668	1659	1772	1696	1707	1723	1679	1679	1654	1660	1709	1690	1684	1654	1698
5400	1905	1886	1888	1958	1703	1714	1719	1716	1723	1716	1761	1709	1709	1685	1744	1702	1708	1701	1677	1656	1661	1646	1647	1607	1624	1660	1636	1666	1663	1645	1678	1677	1646	1653	1643	1634	1745	1667	1678	1694	1644	1644	1627	1633	1676	1661	1657	1639	1667
5407	1911	1878	1878	1960	1705	1720	1725	1720	1721	1718	1759	1711	1711	1685	1742	1706	1710	1707	1677	1658	1665	1650	1635	1607	1624	1660	1624	1668	1665	1649	1668	1667	1648	1655	1651	1636	1745	1667	1678	1700	1648	1648	1629	1635	1680	1667	1659	1633	1673
5415	1940	1921	1933	2013	1742	1761	1770	1767	1770	1773	1802	1756	1756	1732	1791	1755	1763	1752	1730	1713	1706	1695	1684	1664	1677	1713	1663	1715	1712	1696	1709	1708	1687	1696	1690	1687	1796	1716	1727	1753	1693	1693	1672	1678	1723	1708	1708	1674	1716
5424	1914	1903	1923	1981	1710	1743	1752	1747	1746	1753	1778	1736	1736	1714	1761	1721	1731	1736	1702	1681	1682	1673	1672	1642	1653	1685	1645	1683	1680	1662	1687	1686	1653	1664	1658	1659	1770	1696	1707	1721	1679	1679	1640	1646	1697	1684	1674	1658	1686
5413	1913	1888	1878	1958	1703	1720	1725	1722	1721	1718	1757	1707	1707	1683	1744	1708	1714	1709	1677	1658	1665	1652	1641	1605	1620	1658	1626	1672	1669	1647	1666	1665	1640	1655	1653	1630	1747	1669	1680	1702	1648	1648	1631	1635	1680	1663	1659	1637	1675
5408	1966	1941	1943	2027	1766	1781	1788	1783	1788	1785	1826	1772	1772	1750	1813	1769	1773	1766	1742	1729	1728	1713	1706	1672	1689	1727	1691	1733	1730	1712	1735	1734	1713	1720	1712	1703	1810	1736	1747	1765	1717	1717	1698	1704	1747	1730	1726	1696	1736
5411	1944	1919	1921	2005	1748	1761	1770	1763	1772	1765	1806	1756	1756	1750	1793	1749	1771	1748	1724	1709	1710	1713	1688	1672	1671	1709	1671	1713	1710	1694	1715	1714	1693	1700	1692	1685	1790	1734	1745	1745	1697	1697	1678	1684	1727	1732	1706	1680	1716
5416	1895	1870	1864	1948	1699	1706	1711	1708	1717	1706	1749	1699	1699	1683	1736	1698	1710	1699	1667	1648	1657	1652	1631	1607	1614	1652	1620	1664	1661	1641	1654	1653	1634	1647	1639	1626	1737	1667	1678	1692	1638	1638	1625	1629	1672	1663	1651	1623	1665
3104	1904	1871	1867	1949	1694	1709	1714	1711	1714	1707	1748	1702	1702	1674	1735	1695	1699	1700	1670	1647	1652	1639	1624	1600	1615	1649	1615	1655	1652	1638	1653	1652	1635	1642	1640	1623	1732	1658	1669	1687	1635	1635	1620	1624	1667	1658	1648	1624	1662
5403	1998	2001	1993	2059	1848	1885	1878	1867	1860	1893	1900	1878	1878	1838	1889	1859	1863	1900	1838	1811	1812	1801	1796	1762	1775	1803	1775	1815	1814	1790	1827	1826	1787	1794	1798	1791	1890	1824	1835	1843	1825	1825	1784	1790	1845	1814	1812	1796	1840
5341	2041	2044	2014	2042	1867	1842	1833	1824	1867	1832	1843	1873	1873	1793	1842	1834	1820	1847	1841	1814	1795	1784	1769	1813	1826	1794	1818	1816	1813	1841	1808	1809	1788	1787	1785	1790	1849	1811	1820	1814	1810	1810	1773	1779	1816	1795	1805	1791	1803
5377	2069	2070	2044	2124	1891	1886	1877	1870	1899	1884	1915	1877	1877	1867	1914	1906	1908	1891	1883	1866	1865	1852	1839	1823	1838	1858	1828	1866	1867	1849	1858	1859	1846	1843	1835	1850	1927	1857	1864	1872	1838	1838	1825	1831	1858	1863	1863	1845	1863
5402	2071	2070	2046	2126	1889	1886	1875	1868	1899	1884	1915	1875	1875	1867	1914	1908	1908	1889	1879	1864	1863	1850	1841	1825	1840	1858	1828	1866	1867	1849	1858	1859	1846	1843	1835	1848	1925	1855	1862	1872	1840	1840	1825	1831	1858	1861	1861	1847	1863
5338	2036	2043	2009	2091	1856	1883	1878	1867	1864	1863	1892	1856	1856	1834	1879	1867	1853	1864	1824	1853	1832	1819	1804	1792	1807	1835	1809	1857	1852	1832	1843	1842	1827	1838	1830	1827	1882	1846	1855	1851	1843	1843	1812	1818	1847	1840	1846	1818	1832
5345	2075	2080	2052	2082	1907	1858	1853	1844	1903	1840	1875	1881	1881	1825	1872	1876	1864	1847	1877	1850	1831	1818	1811	1843	1858	1828	1864	1856	1853	1885	1842	1843	1828	1833	1825	1830	1889	1853	1862	1852	1826	1826	1815	1819	1858	1831	1847	1829	1835
5335	2054	2059	2027	2115	1884	1885	1880	1873	1884	1871	1906	1858	1858	1858	1907	1905	1895	1880	1858	1879	1864	1849	1842	1818	1835	1861	1845	1889	1886	1864	1875	1876	1861	1866	1856	1863	1916	1876	1885	1887	1859	1859	1846	1850	1883	1862	1880	1864	1868
5333	2012	2011	1993	2009	1820	1799	1804	1795	1836	1795	1810	1828	1828	1758	1795	1791	1781	1816	1794	1779	1762	1751	1746	1780	1793	1769	1791	1777	1776	1794	1775	1776	1751	1752	1748	1753	1806	1772	1781	1781	1793	1793	1732	1738	1773	1772	1768	1770	1766
5339	2054	2057	2035	2053	1858	1853	1832	1823	1872	1833	1858	1880	1880	1806	1843	1841	1837	1860	1860	1803	1808	1795	1786	1802	1817	1791	1833	1807	1808	1834	1803	1804	1781	1782	1782	1787	1870	1800	1809	1819	1815	1815	1766	1772	1809	1806	1800	1794	1808
5344	2062	2063	2031	2073	1884	1847	1828	1821	1902	1835	1878	1876	1876	1836	1873	1851	1861	1842	1878	1815	1816	1805	1788	1820	1833	1801	1817	1817	1814	1848	1811	1812	1797	1796	1790	1797	1880	1804	1813	1823	1789	1789	1776	1782	1831	1816	1816	1798	1814
5342	2023	2020	1996	2028	1841	1836	1807	1796	1861	1822	1835	1863	1863	1805	1830	1808	1834	1837	1837	1772	1775	1778	1747	1797	1796	1758	1780	1772	1769	1805	1766	1767	1752	1751	1751	1754	1843	1785	1794	1780	1760	1760	1733	1739	1798	1789	1771	1757	1775
5334	2039	2040	2004	2048	1857	1820	1799	1792	1883	1806	1849	1847	1847	1809	1844	1824	1838	1825	1851	1788	1791	1782	1759	1799	1810	1774	1792	1792	1789	1823	1784	1785	1770	1771	1765	1772	1853	1779	1788	1798	1764	1764	1749	1755	1804	1801	1791	1779	1787
5336	2034	2025	2005	2089	1842	1869	1840	1835	1860	1855	1888	1846	1846	1864	1883	1873	1891	1874	1838	1839	1842	1853	1812	1814	1803	1825	1801	1841	1840	1818	1831	1832	1825	1818	1812	1821	1886	1856	1865	1845	1823	1823	1798	1804	1835	1866	1836	1820	1838
5337	2035	2024	2004	2086	1841	1884	1857	1850	1857	1868	1891	1859	1859	1839	1880	1874	1866	1891	1837	1840	1839	1826	1813	1789	1804	1824	1800	1842	1841	1817	1832	1833	1824	1817	1813	1822	1887	1831	1840	1844	1846	1846	1799	1805	1840	1839	1837	1819	1841
5343	2036	2031	2005	2093	1844	1891	1854	1847	1858	1877	1890	1868	1868	1838	1885	1877	1873	1896	1844	1845	1846	1833	1818	1796	1811	1831	1807	1849	1848	1824	1837	1838	1829	1824	1824	1829	1894	1836	1845	1851	1837	1837	1804	1810	1843	1846	1844	1824	1846
5340	2054	2049	2021	2109	1860	1881	1854	1849	1874	1865	1902	1856	1856	1854	1899	1895	1893	1884	1864	1861	1862	1849	1834	1810	1825	1847	1827	1865	1864	1840	1853	1854	1845	1840	1836	1845	1912	1852	1861	1869	1835	1835	1820	1826	1861	1862	1860	1840	1862
5331	2163	2164	2136	2228	1985	1988	1997	1994	2005	2000	2041	1985	1985	1973	2034	2040	2008	2003	1991	1996	2003	1988	1987	1953	1970	2010	1976	2014	2013	1987	2020	2019	1992	1993	1981	1990	2043	2003	2006	2012	1990	1990	1983	1983	2022	1989	2015	1991	2015
5330	2158	2159	2127	2217	1972	1979	1990	1987	1988	1995	2036	1978	1978	1960	2025	2027	1997	1996	1978	1983	1986	1973	1974	1948	1963	2005	1965	1997	1996	1970	2001	2000	1987	1988	1976	1979	2024	1990	1993	1995	1977	1977	1978	1978	2007	1972	2002	1982	1998
5332	2157	2156	2122	2214	1969	1974	1987	1984	1985	1990	2033	1973	1973	1957	2024	2024	2000	1999	1983	1982	1983	1970	1973	1945	1960	2004	1962	2000	1999	1973	2004	2003	1984	1985	1975	1976	2027	1993	1996	2000	1982	1982	1977	1977	2010	1975	2007	1981	2003
5373	2183	2170	2170	2180	2041	2010	2011	2006	2069	2020	2045	2047	2047	1983	2040	1998	2008	2011	2027	1950	1961	1950	1941	1971	1984	1956	1978	1976	1973	1997	1976	1977	1946	1953	1943	1944	2029	1975	1980	1990	1966	1966	1935	1939	1980	1965	1967	1953	1981
5365	2182	2155	2157	2181	2048	2019	2022	2027	2076	2023	2054	2054	2054	2014	2047	2001	2025	2018	2042	1955	1960	1969	1938	1992	1987	1969	1981	1967	1968	1996	1961	1964	1945	1958	1948	1949	2042	1994	1995	1993	1951	1951	1944	1948	1983	1986	1966	1946	1962
5352	2195	2176	2160	2226	2019	2040	2035	2038	2043	2032	2071	2019	2019	2005	2062	2054	2046	2033	2015	2022	2023	2008	1997	1971	1990	2018	1994	2026	2025	2005	2026	2027	2004	2013	2003	2004	2077	2035	2034	2044	2006	2006	1995	2001	2044	2017	2023	1999	2023
5405	2214	2191	2179	2205	2068	2031	2044	2045	2090	2045	2080	2078	2078	2008	2069	2035	2049	2036	2070	1987	1992	1981	1972	2004	2019	1991	2019	1999	2000	2028	2001	2004	1975	1976	1964	1977	2074	2000	1999	2019	1981	1981	1960	1966	2019	1990	2000	1966	2006
5374	2188	2169	2141	2175	2054	2011	2014	2017	2078	2009	2048	2050	2050	2002	2039	2007	2043	2016	2046	1965	1968	1975	1940	1996	1993	1971	1987	1975	1974	2004	1973	1974	1947	1962	1952	1949	2044	1996	1995	1993	1953	1953	1938	1944	1989	1988	1970	1954	1976
5346	2185	2224	2212	2300	2137	2200	2167	2160	2185	2172	2203	2169	2169	2153	2192	2164	2164	2171	2125	2126	2127	2112	2099	2077	2094	2102	2076	2118	2115	2101	2108	2107	2112	2115	2107	2104	2189	2109	2120	2130	2114	2114	2093	2093	2112	2109	2117	2121	2117
5425	2186	2223	2211	2299	2138	2199	2166	2159	2184	2171	2202	2168	2168	2154	2191	2163	2163	2170	2124	2125	2126	2111	2098	2076	2093	2101	2075	2117	2114	2100	2107	2106	2111	2114	2106	2103	2190	2108	2119	2129	2113	2113	2092	2092	2111	2110	2116	2120	2116
5366	2145	2138	2130	2162	1987	2002	2009	2010	2017	2008	2039	2003	2003	1997	2026	1990	2020	2007	2001	1952	1961	1966	1945	1941	1938	1952	1956	1966	1967	1961	1984	1981	1940	1955	1947	1936	2031	1983	1992	1986	1958	1958	1929	1931	1984	1981	1961	1953	1969
5380	2159	2132	2098	2180	2009	2024	2045	2046	2025	2028	2059	2017	2017	2013	2050	2048	2048	2029	2027	2014	2013	1998	2001	1967	1984	2018	1960	2012	2011	1993	2016	2017	1988	1985	1983	1992	2077	2003	2012	2020	2010	2010	1971	1971	2028	1985	2013	2001	2029
6741	1734	1701	1675	1747	1538	1533	1568	1583	1552	1541	1588	1532	1532	1526	1573	1523	1547	1530	1528	1513	1504	1493	1484	1462	1477	1511	1469	1507	1510	1492	1517	1514	1485	1490	1480	1489	1576	1514	1527	1541	1495	1495	1478	1486	1535	1504	1510	1486	1518
5387	1796	1761	1761	1825	1612	1621	1644	1663	1622	1625	1666	1606	1606	1588	1651	1613	1627	1616	1598	1589	1578	1563	1560	1528	1547	1577	1557	1591	1592	1572	1595	1592	1569	1574	1562	1563	1650	1588	1603	1617	1575	1575	1548	1556	1619	1580	1594	1552	1592
4561	1864	1819	1813	1885	1672	1679	1702	1719	1682	1687	1728	1670	1670	1658	1715	1679	1689	1678	1670	1653	1646	1631	1628	1592	1611	1639	1623	1653	1654	1636	1661	1658	1639	1640	1628	1637	1712	1652	1667	1683	1641	1641	1616	1624	1677	1652	1662	1618	1654
5396	1811	1774	1784	1834	1629	1638	1655	1670	1641	1638	1681	1623	1623	1611	1668	1636	1654	1639	1629	1614	1601	1586	1589	1547	1566	1596	1584	1608	1609	1589	1618	1615	1590	1599	1587	1592	1667	1609	1622	1640	1596	1596	1571	1579	1632	1605	1617	1577	1617
5393	1825	1762	1748	1824	1607	1614	1631	1644	1631	1622	1663	1613	1613	1617	1652	1610	1648	1627	1605	1600	1603	1608	1581	1559	1558	1598	1580	1600	1603	1585	1602	1601	1578	1583	1573	1576	1655	1617	1628	1638	1586	1586	1565	1571	1618	1627	1597	1577	1607
6402	1858	1811	1803	1867	1650	1663	1678	1693	1670	1669	1712	1654	1654	1644	1699	1667	1677	1664	1650	1633	1636	1621	1612	1576	1595	1625	1597	1627	1628	1608	1637	1636	1611	1612	1606	1611	1696	1632	1645	1671	1619	1619	1590	1598	1645	1642	1630	1606	1642
4563	1830	1799	1779	1857	1636	1653	1672	1689	1666	1661	1700	1642	1642	1628	1689	1649	1671	1648	1644	1625	1616	1601	1604	1556	1575	1609	1583	1617	1618	1602	1621	1620	1593	1602	1590	1595	1692	1620	1635	1653	1601	1601	1578	1586	1639	1616	1622	1580	1634
5394	1751	1694	1672	1740	1531	1554	1569	1586	1541	1564	1581	1543	1543	1507	1568	1530	1558	1567	1529	1536	1523	1508	1509	1467	1486	1520	1506	1528	1529	1505	1536	1533	1510	1513	1507	1506	1575	1531	1544	1564	1528	1528	1491	1497	1548	1527	1531	1493	1539
5395	1761	1696	1682	1746	1531	1560	1571	1588	1551	1568	1589	1553	1553	1515	1576	1534	1562	1573	1543	1538	1523	1508	1513	1471	1490	1520	1510	1538	1539	1513	1542	1539	1514	1519	1517	1510	1577	1535	1548	1568	1536	1536	1495	1501	1554	1533	1537	1505	1541
6392	1776	1721	1725	1777	1570	1581	1602	1613	1580	1583	1626	1564	1564	1546	1609	1571	1585	1574	1554	1569	1558	1543	1540	1504	1523	1555	1539	1569	1570	1550	1573	1572	1543	1556	1546	1539	1612	1576	1587	1607	1557	1557	1530	1536	1597	1558	1564	1536	1574
5390	1794	1733	1721	1791	1570	1591	1602	1615	1592	1591	1636	1574	1574	1560	1621	1589	1597	1592	1570	1573	1574	1559	1552	1512	1531	1563	1547	1573	1574	1556	1577	1576	1555	1554	1544	1545	1624	1578	1589	1613	1557	1557	1536	1542	1603	1572	1570	1540	1586
5392	1850	1791	1777	1851	1626	1641	1660	1675	1650	1649	1692	1632	1632	1620	1679	1637	1653	1638	1628	1627	1626	1613	1608	1566	1583	1621	1599	1627	1628	1612	1635	1632	1607	1612	1602	1603	1680	1630	1641	1663	1609	1609	1590	1596	1653	1630	1630	1594	1636
5391	1848	1813	1797	1875	1656	1665	1682	1695	1676	1679	1712	1662	1662	1652	1705	1663	1681	1674	1660	1637	1634	1619	1604	1574	1593	1635	1603	1631	1634	1614	1635	1634	1613	1614	1602	1615	1712	1626	1639	1667	1613	1613	1596	1604	1649	1628	1632	1600	1636
5401	1808	1781	1767	1839	1624	1635	1658	1671	1636	1641	1680	1624	1624	1612	1665	1631	1643	1628	1616	1603	1594	1581	1572	1540	1557	1591	1571	1601	1604	1586	1603	1602	1575	1586	1574	1575	1670	1604	1617	1633	1583	1583	1566	1574	1633	1594	1604	1570	1600
5389	1845	1804	1794	1868	1645	1662	1679	1692	1667	1670	1709	1653	1653	1639	1698	1662	1670	1659	1645	1624	1621	1608	1605	1573	1590	1624	1594	1628	1629	1611	1626	1625	1600	1609	1599	1598	1695	1619	1634	1662	1610	1610	1585	1593	1644	1629	1631	1591	1633
4562	1875	1840	1830	1904	1699	1702	1723	1734	1709	1714	1749	1699	1699	1685	1736	1700	1712	1703	1689	1678	1669	1654	1643	1611	1630	1666	1646	1674	1677	1659	1680	1679	1652	1657	1645	1654	1741	1669	1682	1702	1656	1656	1641	1649	1696	1663	1677	1643	1673
4565	1853	1808	1790	1868	1661	1662	1687	1702	1677	1678	1709	1661	1661	1649	1700	1664	1680	1669	1659	1656	1649	1634	1625	1585	1604	1644	1620	1644	1647	1631	1648	1647	1624	1625	1613	1628	1707	1643	1658	1680	1626	1626	1611	1619	1664	1641	1649	1615	1655
5367	1776	1741	1745	1805	1598	1597	1622	1633	1614	1605	1640	1594	1594	1600	1629	1597	1631	1610	1590	1573	1562	1567	1534	1520	1519	1557	1543	1569	1572	1556	1571	1570	1545	1552	1540	1547	1634	1584	1597	1599	1547	1547	1534	1542	1589	1586	1570	1550	1566
6390	1848	1813	1801	1853	1672	1647	1672	1683	1678	1663	1694	1670	1670	1632	1681	1647	1661	1650	1656	1623	1614	1601	1588	1578	1595	1611	1619	1621	1624	1630	1625	1624	1599	1604	1592	1603	1688	1620	1633	1649	1605	1605	1586	1594	1639	1614	1624	1588	1616
6388	1848	1813	1801	1853	1672	1647	1672	1683	1678	1663	1694	1670	1670	1632	1681	1647	1661	1650	1656	1623	1614	1601	1588	1578	1595	1611	1619	1621	1624	1630	1625	1624	1599	1604	1592	1603	1688	1620	1633	1649	1605	1605	1586	1594	1639	1614	1624	1588	1616
6389	1846	1811	1799	1853	1670	1647	1672	1683	1676	1663	1694	1668	1668	1632	1681	1647	1663	1650	1656	1625	1614	1601	1590	1576	1593	1611	1619	1623	1626	1630	1627	1626	1601	1606	1594	1605	1688	1622	1635	1649	1607	1607	1588	1596	1641	1614	1626	1590	1618
6391	1808	1773	1757	1831	1620	1629	1650	1659	1628	1635	1672	1614	1614	1608	1661	1627	1637	1628	1608	1597	1588	1573	1568	1532	1551	1585	1567	1595	1598	1578	1599	1598	1575	1578	1566	1575	1666	1600	1613	1629	1579	1579	1558	1566	1625	1590	1596	1558	1598
5388	1827	1798	1782	1856	1645	1650	1675	1686	1665	1656	1699	1639	1639	1633	1690	1648	1668	1647	1641	1628	1613	1600	1597	1557	1574	1608	1588	1624	1625	1609	1628	1627	1606	1607	1595	1602	1687	1623	1636	1654	1608	1608	1583	1591	1644	1615	1625	1587	1629
6361	1723	1660	1650	1708	1541	1534	1563	1576	1557	1540	1579	1537	1537	1515	1564	1532	1546	1537	1537	1528	1525	1514	1503	1491	1506	1528	1504	1528	1531	1521	1534	1531	1502	1505	1497	1510	1565	1535	1542	1560	1516	1516	1489	1495	1556	1525	1525	1505	1537
5378	1708	1679	1659	1735	1548	1557	1580	1591	1554	1561	1598	1540	1540	1528	1583	1541	1555	1548	1526	1515	1512	1497	1484	1458	1477	1503	1487	1517	1520	1500	1523	1520	1495	1500	1488	1491	1580	1520	1529	1551	1505	1505	1484	1492	1541	1512	1518	1488	1520
5349	1708	1679	1663	1731	1550	1553	1584	1597	1562	1563	1598	1544	1544	1542	1589	1549	1565	1552	1536	1521	1522	1511	1492	1470	1485	1513	1483	1523	1526	1504	1525	1522	1497	1502	1494	1497	1584	1526	1535	1557	1511	1511	1486	1494	1547	1526	1522	1500	1526
5351	1701	1674	1654	1714	1541	1534	1567	1578	1555	1544	1581	1539	1539	1537	1568	1528	1562	1531	1529	1500	1495	1502	1475	1471	1468	1490	1474	1502	1505	1493	1506	1503	1476	1483	1473	1478	1565	1527	1536	1532	1490	1490	1467	1475	1528	1523	1501	1483	1505
6360	1718	1659	1647	1705	1504	1485	1498	1517	1526	1501	1536	1508	1508	1476	1517	1491	1509	1496	1506	1479	1474	1469	1454	1462	1471	1469	1465	1481	1484	1486	1477	1474	1453	1444	1436	1455	1526	1474	1481	1507	1455	1455	1434	1440	1499	1494	1476	1444	1480
5379	1721	1662	1650	1708	1507	1488	1501	1520	1529	1504	1539	1511	1511	1477	1520	1494	1510	1499	1509	1482	1477	1470	1457	1463	1474	1472	1468	1484	1487	1489	1480	1477	1456	1447	1439	1458	1529	1475	1482	1510	1458	1458	1437	1443	1502	1495	1479	1447	1483
6740	1682	1659	1629	1711	1498	1507	1530	1547	1522	1521	1558	1502	1502	1506	1543	1503	1541	1508	1492	1475	1474	1479	1450	1436	1435	1467	1443	1475	1478	1456	1477	1474	1451	1456	1444	1445	1546	1492	1507	1505	1455	1455	1434	1442	1501	1494	1476	1440	1484
6734	1666	1641	1613	1689	1478	1517	1530	1543	1500	1527	1542	1506	1506	1464	1527	1483	1503	1518	1472	1461	1456	1441	1432	1398	1417	1447	1429	1457	1460	1438	1457	1454	1429	1438	1432	1425	1528	1458	1473	1487	1453	1453	1416	1424	1485	1452	1458	1418	1472
6731	1665	1640	1612	1688	1477	1516	1529	1542	1499	1526	1541	1505	1505	1463	1526	1482	1502	1517	1471	1460	1455	1440	1431	1397	1416	1446	1428	1456	1459	1437	1456	1453	1428	1437	1431	1424	1527	1457	1472	1486	1452	1452	1415	1423	1484	1451	1457	1417	1471
6733	1665	1640	1612	1688	1477	1516	1529	1542	1499	1526	1541	1505	1505	1463	1526	1482	1502	1517	1471	1460	1455	1440	1431	1397	1416	1446	1428	1456	1459	1437	1456	1453	1428	1437	1431	1424	1527	1457	1472	1486	1452	1452	1415	1423	1484	1451	1457	1417	1471
6732	1618	1593	1565	1641	1434	1469	1484	1497	1458	1481	1496	1464	1464	1440	1479	1437	1477	1474	1428	1413	1412	1417	1388	1374	1373	1403	1383	1411	1414	1392	1411	1408	1383	1390	1384	1379	1482	1430	1445	1439	1405	1405	1370	1378	1439	1430	1412	1376	1426
5441	1716	1693	1663	1745	1532	1543	1568	1583	1554	1555	1594	1534	1534	1518	1579	1537	1559	1542	1528	1515	1510	1495	1486	1450	1469	1501	1481	1511	1514	1492	1511	1508	1485	1492	1480	1479	1582	1510	1525	1541	1491	1491	1470	1478	1537	1504	1512	1470	1524
6736	1719	1696	1666	1748	1535	1546	1571	1586	1557	1558	1597	1537	1537	1521	1582	1540	1562	1545	1529	1518	1513	1498	1489	1453	1472	1504	1484	1514	1517	1495	1514	1511	1486	1495	1483	1482	1585	1513	1528	1544	1494	1494	1473	1481	1540	1507	1515	1473	1527
6735	1721	1698	1668	1750	1537	1548	1573	1588	1559	1560	1599	1539	1539	1523	1584	1542	1564	1547	1531	1520	1515	1500	1491	1455	1474	1506	1486	1516	1519	1497	1516	1513	1488	1497	1485	1484	1587	1515	1530	1546	1496	1496	1475	1483	1542	1509	1517	1475	1529
6739	1715	1692	1662	1744	1531	1542	1567	1582	1555	1554	1593	1533	1533	1517	1578	1536	1558	1543	1525	1514	1509	1494	1485	1449	1468	1500	1480	1510	1513	1491	1510	1507	1482	1491	1479	1478	1581	1509	1524	1540	1490	1490	1469	1477	1536	1505	1511	1471	1523
6738	1717	1694	1664	1746	1533	1544	1569	1584	1555	1556	1595	1535	1535	1519	1580	1538	1560	1543	1527	1516	1511	1496	1487	1451	1470	1502	1482	1512	1515	1493	1512	1509	1484	1493	1481	1480	1583	1511	1526	1542	1492	1492	1471	1479	1538	1505	1513	1471	1525
14	1620	1577	1565	1639	1418	1459	1468	1479	1450	1471	1486	1456	1456	1440	1467	1423	1447	1458	1408	1397	1404	1409	1386	1364	1363	1397	1365	1397	1400	1382	1409	1406	1375	1386	1378	1377	1456	1420	1433	1437	1401	1401	1366	1374	1429	1436	1400	1384	1416
3926	1601	1574	1544	1630	1409	1420	1433	1448	1425	1426	1471	1411	1411	1399	1452	1420	1426	1417	1397	1382	1385	1370	1357	1323	1342	1372	1350	1378	1381	1363	1386	1383	1360	1357	1349	1354	1451	1371	1384	1412	1362	1362	1343	1351	1408	1385	1385	1343	1391
4636	1600	1573	1543	1631	1412	1421	1434	1451	1428	1429	1474	1414	1414	1402	1455	1421	1427	1420	1400	1385	1388	1373	1360	1326	1345	1375	1353	1381	1384	1366	1389	1386	1363	1360	1352	1357	1452	1372	1387	1415	1365	1365	1346	1354	1411	1388	1390	1346	1394
4571	1596	1569	1539	1625	1406	1417	1430	1445	1422	1423	1468	1408	1408	1396	1449	1417	1425	1414	1396	1381	1382	1367	1356	1320	1339	1369	1349	1377	1380	1362	1385	1382	1359	1356	1348	1353	1448	1370	1383	1409	1361	1361	1342	1350	1407	1382	1384	1342	1390
4590	1595	1568	1538	1624	1405	1416	1429	1444	1421	1422	1467	1407	1407	1395	1448	1416	1422	1413	1393	1378	1381	1366	1353	1319	1338	1368	1346	1374	1377	1359	1382	1379	1356	1353	1345	1350	1447	1367	1380	1408	1358	1358	1339	1347	1404	1381	1381	1339	1387
4654	1605	1576	1546	1634	1415	1424	1437	1452	1431	1432	1477	1417	1417	1405	1458	1424	1432	1423	1405	1390	1391	1376	1365	1329	1348	1378	1358	1386	1389	1371	1394	1391	1368	1365	1357	1362	1455	1377	1390	1418	1370	1370	1351	1359	1416	1391	1393	1351	1399
4588	1595	1566	1536	1620	1403	1414	1425	1440	1419	1418	1463	1405	1405	1391	1444	1412	1416	1411	1389	1372	1377	1362	1347	1317	1336	1364	1346	1370	1373	1357	1378	1375	1352	1349	1341	1346	1445	1367	1380	1404	1354	1354	1335	1343	1404	1377	1377	1335	1381
184	1548	1507	1465	1545	1316	1341	1358	1371	1344	1345	1388	1324	1324	1320	1373	1333	1353	1342	1326	1325	1326	1315	1304	1266	1281	1315	1287	1319	1322	1300	1325	1322	1293	1298	1294	1293	1378	1320	1331	1359	1305	1305	1282	1288	1349	1328	1316	1294	1336
174	1532	1507	1473	1555	1332	1345	1364	1377	1356	1353	1398	1332	1332	1320	1381	1341	1355	1348	1330	1319	1314	1301	1294	1252	1269	1303	1281	1307	1310	1292	1315	1312	1289	1284	1276	1283	1380	1308	1321	1343	1291	1291	1274	1282	1337	1310	1314	1274	1326
125	1603	1570	1550	1624	1403	1420	1437	1452	1429	1428	1471	1409	1409	1397	1456	1416	1426	1415	1397	1384	1385	1370	1359	1321	1340	1372	1348	1380	1383	1365	1388	1385	1356	1363	1355	1356	1453	1375	1388	1418	1368	1368	1341	1349	1408	1381	1383	1347	1391
122	1609	1576	1552	1628	1407	1424	1441	1456	1435	1432	1475	1413	1413	1401	1460	1420	1428	1419	1403	1390	1387	1372	1363	1325	1344	1376	1350	1384	1387	1367	1392	1389	1358	1365	1359	1362	1457	1379	1392	1420	1374	1374	1343	1351	1410	1387	1385	1353	1393
212	1541	1500	1484	1554	1333	1376	1379	1392	1355	1386	1401	1363	1363	1329	1384	1354	1356	1371	1327	1312	1313	1298	1289	1259	1278	1308	1278	1312	1315	1295	1318	1315	1288	1291	1289	1286	1381	1303	1316	1346	1312	1312	1271	1279	1340	1319	1313	1277	1321
190	1560	1521	1501	1581	1366	1369	1394	1409	1378	1381	1420	1358	1358	1348	1403	1369	1379	1370	1354	1349	1332	1317	1312	1284	1303	1333	1309	1345	1348	1326	1351	1348	1323	1320	1314	1321	1402	1332	1347	1367	1329	1329	1304	1312	1369	1340	1346	1310	1340
2961	1571	1530	1514	1592	1373	1390	1399	1414	1393	1392	1439	1375	1375	1363	1420	1384	1392	1387	1365	1352	1345	1330	1323	1295	1314	1342	1316	1346	1349	1329	1354	1351	1322	1325	1319	1322	1417	1335	1350	1376	1332	1332	1309	1317	1372	1351	1349	1313	1351
2448	1558	1515	1497	1553	1358	1349	1358	1373	1388	1351	1398	1360	1360	1324	1381	1341	1355	1358	1352	1313	1304	1293	1284	1282	1297	1303	1299	1305	1308	1314	1313	1310	1281	1284	1280	1281	1376	1298	1313	1337	1293	1293	1270	1278	1331	1320	1310	1284	1312
1860	1565	1526	1508	1586	1365	1378	1393	1408	1387	1386	1427	1365	1365	1359	1412	1376	1388	1381	1357	1346	1339	1328	1317	1293	1308	1336	1308	1338	1341	1321	1346	1343	1318	1317	1311	1316	1409	1335	1348	1370	1326	1326	1301	1309	1364	1349	1341	1307	1345
81	1543	1498	1494	1560	1341	1368	1381	1396	1361	1372	1403	1353	1353	1331	1388	1352	1360	1369	1333	1320	1313	1298	1291	1263	1282	1310	1286	1314	1317	1297	1322	1319	1290	1293	1287	1290	1385	1305	1320	1344	1324	1324	1277	1285	1342	1319	1319	1281	1321
2367	1562	1525	1509	1589	1376	1381	1400	1415	1386	1385	1432	1368	1368	1356	1411	1377	1389	1380	1362	1355	1336	1321	1320	1290	1309	1337	1319	1351	1354	1334	1363	1360	1329	1330	1320	1327	1410	1338	1353	1375	1337	1337	1314	1322	1373	1340	1356	1314	1346
181	1562	1523	1509	1589	1376	1381	1400	1415	1386	1385	1432	1368	1368	1356	1411	1379	1387	1380	1362	1355	1336	1321	1320	1288	1307	1337	1319	1351	1354	1334	1363	1360	1331	1330	1320	1327	1410	1338	1353	1375	1337	1337	1314	1322	1373	1340	1356	1314	1346
2928	1546	1511	1491	1569	1356	1357	1382	1397	1368	1367	1408	1346	1346	1338	1391	1359	1363	1360	1338	1333	1320	1305	1298	1274	1293	1321	1299	1331	1334	1314	1343	1340	1313	1310	1304	1309	1390	1322	1335	1357	1319	1319	1294	1302	1353	1326	1336	1298	1326
2451	1542	1507	1487	1567	1356	1355	1380	1395	1368	1367	1408	1346	1346	1338	1391	1357	1361	1360	1338	1333	1320	1305	1298	1274	1293	1321	1299	1331	1334	1314	1343	1340	1313	1310	1304	1309	1388	1320	1333	1357	1319	1319	1294	1302	1353	1326	1336	1298	1326
2287	1544	1509	1489	1567	1354	1355	1380	1395	1366	1365	1406	1344	1344	1336	1389	1357	1361	1358	1336	1331	1318	1303	1296	1272	1291	1319	1297	1329	1332	1312	1341	1338	1311	1308	1302	1307	1388	1320	1333	1355	1317	1317	1292	1300	1351	1324	1334	1296	1324
2294	1550	1515	1495	1573	1364	1363	1388	1403	1372	1375	1414	1354	1354	1346	1397	1365	1371	1368	1344	1339	1328	1313	1304	1280	1299	1329	1307	1337	1340	1320	1349	1346	1319	1316	1310	1315	1398	1328	1341	1363	1325	1325	1302	1310	1359	1332	1342	1306	1332
446	1571	1536	1514	1592	1381	1382	1409	1424	1393	1392	1433	1371	1371	1365	1418	1382	1390	1387	1365	1358	1347	1332	1323	1291	1310	1340	1324	1356	1359	1339	1368	1365	1336	1335	1329	1334	1417	1349	1362	1384	1344	1344	1319	1327	1378	1351	1361	1325	1353
124	1576	1541	1519	1597	1386	1387	1414	1429	1398	1397	1438	1376	1376	1370	1423	1387	1395	1392	1370	1363	1352	1337	1328	1296	1315	1345	1329	1361	1364	1344	1373	1370	1341	1340	1334	1339	1422	1354	1367	1389	1349	1349	1324	1332	1383	1356	1366	1330	1358
5491	1574	1539	1517	1595	1386	1387	1414	1429	1398	1397	1438	1376	1376	1370	1423	1387	1395	1392	1368	1363	1352	1337	1328	1296	1315	1345	1329	1361	1364	1344	1373	1370	1339	1340	1334	1339	1422	1354	1367	1389	1349	1349	1324	1332	1383	1356	1366	1330	1358
2254	1565	1528	1510	1588	1377	1378	1401	1416	1387	1386	1429	1367	1367	1359	1412	1378	1384	1381	1357	1350	1339	1324	1317	1293	1312	1340	1320	1352	1355	1335	1364	1361	1330	1331	1325	1326	1411	1341	1354	1376	1338	1338	1315	1323	1378	1345	1357	1319	1345
92	1561	1524	1506	1584	1373	1374	1397	1412	1383	1382	1425	1363	1363	1355	1408	1374	1380	1377	1353	1346	1335	1320	1313	1289	1308	1336	1316	1348	1351	1331	1360	1357	1326	1327	1321	1322	1407	1337	1350	1372	1334	1334	1311	1319	1374	1341	1353	1315	1341
91	1551	1516	1496	1574	1363	1364	1389	1404	1373	1374	1415	1353	1353	1345	1398	1364	1370	1367	1343	1338	1327	1312	1305	1281	1300	1328	1306	1338	1341	1321	1350	1347	1318	1317	1311	1314	1399	1329	1342	1364	1326	1326	1303	1311	1364	1333	1343	1305	1333
2253	1515	1480	1458	1534	1325	1330	1353	1366	1335	1336	1379	1315	1315	1309	1362	1328	1334	1333	1305	1304	1291	1278	1271	1245	1262	1292	1272	1300	1303	1283	1312	1309	1278	1279	1275	1276	1363	1301	1314	1328	1290	1290	1267	1275	1334	1297	1307	1269	1299
2349	1518	1485	1463	1539	1328	1333	1356	1369	1338	1339	1382	1318	1318	1312	1363	1331	1337	1334	1308	1305	1294	1281	1272	1246	1263	1291	1275	1303	1306	1286	1315	1312	1283	1282	1276	1279	1366	1304	1317	1329	1291	1291	1268	1276	1337	1300	1308	1270	1300
2274	1530	1497	1475	1551	1340	1345	1368	1381	1350	1351	1394	1330	1330	1324	1375	1343	1349	1346	1320	1317	1306	1293	1284	1256	1273	1301	1287	1315	1318	1298	1327	1324	1295	1294	1288	1291	1378	1316	1329	1341	1303	1303	1280	1288	1349	1312	1320	1282	1312
4	1534	1493	1481	1553	1346	1373	1386	1399	1354	1381	1398	1360	1360	1326	1381	1345	1347	1372	1324	1319	1310	1295	1286	1258	1277	1307	1291	1319	1322	1304	1331	1328	1301	1300	1298	1295	1378	1312	1325	1347	1323	1323	1284	1292	1349	1314	1326	1286	1318
70	1583	1546	1528	1606	1395	1396	1419	1434	1405	1406	1447	1385	1385	1377	1430	1396	1404	1395	1379	1372	1357	1342	1337	1305	1324	1354	1338	1370	1373	1353	1382	1379	1348	1349	1343	1346	1431	1361	1374	1394	1356	1356	1335	1343	1396	1363	1375	1337	1365
90	1553	1516	1498	1576	1365	1366	1389	1404	1377	1376	1417	1355	1355	1347	1400	1366	1374	1365	1349	1342	1327	1312	1307	1277	1296	1326	1308	1340	1343	1323	1352	1349	1318	1319	1313	1316	1401	1331	1344	1364	1326	1326	1305	1313	1366	1333	1345	1307	1335
56	1556	1519	1501	1579	1368	1369	1392	1407	1378	1379	1420	1358	1358	1350	1403	1369	1377	1368	1352	1345	1330	1315	1310	1280	1299	1329	1311	1343	1346	1326	1355	1352	1321	1322	1316	1319	1404	1334	1347	1367	1329	1329	1308	1316	1369	1336	1348	1310	1338
112	1554	1515	1499	1577	1362	1363	1386	1401	1372	1371	1416	1352	1352	1344	1397	1365	1369	1366	1344	1337	1324	1309	1302	1276	1295	1323	1305	1337	1340	1320	1349	1346	1319	1316	1310	1313	1396	1326	1339	1361	1323	1323	1300	1308	1359	1330	1342	1304	1330
82	1564	1525	1509	1587	1374	1375	1398	1413	1384	1383	1428	1364	1364	1356	1409	1377	1381	1378	1354	1349	1336	1321	1314	1286	1305	1333	1317	1349	1352	1332	1359	1356	1329	1328	1322	1325	1408	1338	1351	1373	1335	1335	1312	1320	1371	1342	1352	1316	1342
119	1554	1515	1499	1577	1362	1363	1386	1401	1372	1371	1416	1352	1352	1344	1397	1365	1369	1366	1344	1337	1324	1309	1302	1276	1295	1323	1305	1337	1340	1320	1349	1346	1319	1316	1310	1313	1396	1326	1339	1361	1323	1323	1300	1308	1359	1330	1342	1304	1330
111	1505	1468	1450	1528	1319	1316	1341	1356	1331	1326	1369	1311	1311	1327	1354	1318	1350	1325	1305	1292	1281	1286	1261	1255	1254	1282	1260	1292	1295	1275	1304	1301	1274	1269	1263	1274	1353	1299	1312	1314	1276	1276	1255	1263	1314	1309	1297	1263	1287
84	1557	1520	1502	1580	1367	1368	1393	1408	1377	1376	1419	1357	1357	1355	1406	1368	1380	1373	1353	1346	1329	1314	1309	1281	1300	1328	1310	1342	1345	1325	1354	1351	1324	1321	1315	1324	1403	1331	1344	1366	1328	1328	1305	1313	1364	1335	1347	1311	1337
32	1524	1483	1477	1543	1330	1345	1370	1383	1340	1351	1382	1332	1332	1312	1365	1333	1343	1348	1314	1311	1292	1277	1274	1246	1265	1293	1275	1307	1310	1288	1317	1314	1285	1284	1278	1281	1364	1296	1309	1329	1315	1315	1268	1276	1329	1300	1310	1274	1302
79	1531	1490	1484	1550	1337	1352	1375	1388	1347	1358	1389	1339	1339	1319	1372	1340	1348	1355	1321	1314	1299	1284	1279	1253	1272	1300	1282	1314	1317	1295	1324	1321	1292	1291	1285	1288	1371	1303	1316	1336	1322	1322	1275	1283	1336	1307	1317	1279	1309
2903	1559	1522	1504	1582	1369	1370	1395	1410	1379	1378	1421	1359	1359	1351	1404	1372	1380	1373	1353	1348	1331	1316	1311	1285	1304	1332	1312	1346	1349	1327	1356	1353	1324	1323	1317	1320	1403	1333	1346	1368	1330	1330	1307	1315	1366	1339	1349	1313	1339
2801	1556	1519	1501	1579	1366	1367	1392	1407	1376	1375	1418	1356	1356	1348	1401	1369	1379	1370	1350	1347	1328	1313	1310	1282	1301	1329	1309	1343	1346	1324	1353	1350	1321	1320	1314	1317	1400	1330	1343	1365	1327	1327	1304	1312	1363	1336	1346	1310	1336
39	1560	1523	1505	1583	1370	1371	1394	1409	1380	1379	1422	1360	1360	1352	1405	1373	1381	1374	1354	1347	1332	1317	1312	1284	1303	1331	1313	1347	1350	1328	1357	1354	1325	1324	1318	1321	1404	1334	1347	1369	1331	1331	1308	1316	1367	1340	1350	1312	1340
4602	1539	1496	1484	1556	1345	1372	1385	1398	1355	1378	1397	1359	1359	1327	1382	1346	1358	1375	1329	1322	1309	1294	1287	1257	1276	1306	1290	1320	1323	1303	1330	1327	1300	1299	1297	1294	1379	1311	1324	1346	1320	1320	1283	1291	1344	1313	1325	1287	1319
2454	1505	1462	1446	1522	1311	1338	1351	1364	1321	1348	1365	1327	1327	1291	1348	1314	1322	1341	1295	1290	1275	1260	1253	1229	1248	1276	1256	1286	1289	1269	1294	1291	1264	1263	1261	1264	1343	1277	1290	1310	1288	1288	1249	1257	1310	1281	1289	1253	1285
131	1554	1515	1493	1573	1360	1361	1386	1401	1370	1371	1412	1350	1350	1340	1395	1365	1375	1364	1346	1341	1324	1309	1304	1276	1295	1323	1303	1335	1338	1318	1343	1340	1315	1312	1306	1313	1394	1326	1339	1359	1321	1321	1298	1306	1357	1330	1338	1302	1332
2432	1559	1520	1498	1580	1367	1366	1393	1408	1377	1378	1419	1357	1357	1347	1402	1370	1378	1371	1353	1348	1331	1316	1309	1285	1304	1332	1310	1342	1345	1325	1352	1349	1322	1319	1313	1320	1399	1331	1344	1366	1328	1328	1305	1313	1364	1337	1347	1311	1339
5055	1494	1463	1439	1513	1294	1333	1334	1347	1314	1341	1358	1320	1320	1284	1339	1305	1313	1332	1284	1275	1272	1259	1250	1216	1233	1261	1241	1265	1268	1250	1275	1272	1247	1244	1242	1243	1338	1264	1277	1299	1269	1269	1234	1242	1299	1274	1272	1234	1282
2346	1526	1485	1473	1547	1332	1363	1374	1387	1342	1369	1388	1350	1350	1320	1375	1335	1341	1360	1318	1307	1294	1279	1272	1248	1267	1295	1279	1309	1312	1292	1317	1314	1291	1284	1282	1291	1368	1298	1311	1331	1309	1309	1272	1280	1333	1302	1312	1278	1302
114	1521	1478	1470	1542	1319	1360	1361	1374	1339	1368	1385	1347	1347	1313	1368	1332	1338	1359	1313	1296	1291	1276	1273	1241	1260	1286	1266	1296	1299	1279	1306	1303	1272	1275	1273	1272	1363	1287	1300	1326	1298	1298	1259	1267	1320	1299	1301	1263	1301
55	1542	1499	1491	1563	1342	1383	1384	1399	1362	1391	1408	1370	1370	1336	1391	1355	1361	1382	1336	1319	1314	1299	1296	1262	1281	1307	1289	1319	1322	1302	1329	1326	1295	1298	1296	1295	1386	1310	1323	1349	1321	1321	1282	1290	1343	1322	1326	1286	1324
2378	1560	1517	1505	1585	1362	1373	1386	1401	1382	1387	1428	1364	1364	1356	1409	1375	1379	1376	1354	1337	1334	1319	1314	1286	1305	1331	1305	1337	1340	1320	1347	1344	1317	1316	1310	1313	1404	1324	1337	1369	1323	1323	1300	1308	1359	1342	1342	1304	1340
45	1555	1516	1502	1580	1355	1368	1381	1396	1375	1378	1419	1357	1357	1349	1402	1370	1376	1369	1351	1332	1327	1312	1309	1277	1296	1322	1300	1332	1335	1315	1342	1339	1312	1311	1305	1308	1399	1321	1334	1362	1318	1318	1295	1303	1354	1335	1337	1299	1335
102	1558	1519	1505	1583	1358	1371	1384	1399	1378	1381	1422	1360	1360	1352	1405	1373	1377	1372	1352	1333	1330	1315	1310	1280	1299	1325	1301	1333	1336	1316	1343	1340	1313	1312	1306	1309	1402	1322	1335	1365	1319	1319	1296	1304	1355	1338	1338	1300	1336
2540	1556	1517	1503	1581	1358	1371	1384	1399	1378	1381	1422	1360	1360	1352	1405	1373	1377	1372	1350	1333	1330	1315	1310	1282	1301	1327	1301	1333	1336	1316	1343	1340	1311	1312	1306	1309	1402	1322	1335	1365	1319	1319	1296	1304	1355	1338	1338	1300	1336
26	1562	1523	1509	1587	1362	1375	1388	1403	1382	1385	1426	1364	1364	1356	1409	1377	1381	1376	1356	1337	1334	1319	1314	1286	1305	1331	1305	1337	1340	1320	1347	1344	1317	1316	1310	1313	1406	1326	1339	1369	1323	1323	1300	1308	1359	1342	1342	1304	1340
2347	1569	1530	1516	1594	1369	1382	1395	1410	1389	1392	1433	1371	1371	1363	1416	1384	1388	1383	1363	1344	1341	1326	1321	1293	1312	1338	1312	1344	1347	1327	1354	1351	1324	1323	1317	1320	1413	1333	1346	1376	1330	1330	1307	1315	1366	1349	1349	1311	1347
54	1584	1545	1531	1611	1388	1399	1412	1427	1408	1411	1452	1390	1390	1382	1435	1401	1407	1402	1384	1365	1360	1345	1342	1310	1329	1355	1333	1365	1368	1348	1375	1372	1345	1344	1338	1341	1430	1352	1365	1395	1351	1351	1328	1336	1387	1368	1370	1332	1368
57	1564	1523	1509	1587	1364	1377	1390	1405	1384	1389	1428	1366	1366	1358	1411	1379	1385	1378	1360	1341	1336	1321	1318	1286	1305	1331	1309	1341	1344	1324	1351	1348	1321	1320	1314	1317	1408	1330	1343	1371	1327	1327	1304	1312	1363	1344	1346	1308	1344
103	1513	1470	1462	1534	1309	1350	1351	1364	1329	1358	1375	1337	1337	1303	1358	1324	1328	1349	1303	1284	1281	1266	1261	1231	1250	1276	1254	1284	1287	1267	1294	1291	1264	1263	1261	1260	1353	1275	1288	1316	1286	1286	1247	1255	1308	1289	1289	1251	1289
4924	1559	1520	1506	1584	1361	1374	1387	1402	1381	1384	1425	1363	1363	1355	1408	1376	1380	1375	1353	1336	1333	1318	1313	1285	1304	1330	1304	1336	1339	1319	1346	1343	1314	1315	1309	1312	1405	1325	1338	1368	1322	1322	1299	1307	1358	1341	1341	1303	1339
52	1563	1524	1510	1588	1363	1376	1389	1404	1383	1386	1427	1365	1365	1357	1410	1378	1384	1377	1359	1340	1335	1320	1317	1285	1304	1330	1308	1340	1343	1323	1350	1347	1320	1319	1313	1316	1407	1329	1342	1370	1326	1326	1303	1311	1362	1343	1345	1307	1343
2445	1533	1502	1478	1556	1333	1348	1365	1378	1353	1354	1397	1333	1333	1323	1378	1348	1354	1349	1327	1314	1309	1294	1285	1257	1276	1304	1276	1306	1309	1289	1316	1313	1286	1285	1279	1284	1381	1303	1316	1340	1292	1292	1271	1279	1336	1313	1311	1277	1317
371	1562	1531	1505	1585	1366	1377	1392	1407	1384	1387	1426	1366	1366	1362	1415	1379	1393	1384	1362	1345	1340	1325	1320	1288	1307	1335	1307	1339	1342	1322	1349	1346	1325	1316	1310	1321	1414	1330	1343	1371	1325	1325	1302	1310	1361	1346	1344	1306	1348
2284	1570	1539	1513	1593	1374	1385	1402	1417	1392	1395	1434	1374	1374	1370	1423	1387	1397	1392	1366	1351	1348	1333	1324	1298	1317	1345	1315	1347	1350	1330	1357	1354	1331	1324	1318	1329	1422	1338	1351	1379	1333	1333	1310	1318	1369	1354	1352	1316	1354
100	1571	1538	1514	1594	1375	1386	1401	1416	1395	1394	1435	1375	1375	1371	1424	1388	1396	1391	1367	1352	1347	1332	1323	1297	1316	1344	1316	1348	1351	1331	1358	1355	1330	1325	1319	1330	1421	1337	1350	1378	1332	1332	1311	1319	1370	1353	1353	1317	1353
2894	1572	1539	1515	1595	1374	1385	1400	1415	1394	1393	1434	1374	1374	1370	1423	1387	1395	1390	1368	1351	1346	1331	1322	1296	1315	1343	1315	1347	1350	1330	1357	1354	1331	1324	1318	1329	1420	1336	1349	1377	1331	1331	1310	1318	1369	1352	1352	1316	1352
128	1572	1539	1515	1595	1376	1387	1402	1417	1396	1395	1436	1376	1376	1372	1425	1389	1397	1392	1368	1353	1348	1333	1324	1298	1317	1345	1317	1349	1352	1332	1359	1356	1331	1326	1320	1331	1422	1338	1351	1379	1333	1333	1312	1320	1371	1354	1354	1318	1354
4923	1507	1468	1454	1526	1313	1342	1355	1368	1321	1348	1367	1329	1329	1295	1350	1314	1326	1345	1293	1292	1275	1260	1257	1229	1248	1276	1258	1290	1293	1271	1300	1297	1264	1267	1265	1262	1347	1279	1292	1312	1290	1290	1251	1259	1312	1283	1293	1257	1285
104	1517	1474	1464	1536	1323	1352	1365	1378	1333	1358	1377	1339	1339	1305	1360	1324	1332	1353	1307	1302	1285	1270	1265	1235	1254	1284	1268	1298	1301	1281	1310	1307	1276	1277	1275	1274	1357	1289	1302	1322	1300	1300	1261	1269	1322	1291	1303	1267	1295
443	1563	1526	1506	1584	1371	1372	1397	1412	1381	1380	1423	1361	1361	1359	1410	1372	1388	1379	1357	1348	1335	1320	1315	1279	1298	1328	1314	1346	1349	1329	1358	1355	1326	1325	1319	1324	1409	1337	1350	1372	1332	1332	1309	1317	1368	1339	1351	1315	1343
172	1521	1486	1462	1546	1327	1334	1359	1372	1347	1346	1387	1329	1329	1337	1368	1332	1364	1339	1321	1304	1305	1308	1285	1263	1264	1296	1264	1296	1299	1281	1306	1303	1274	1275	1267	1274	1371	1305	1318	1330	1280	1280	1259	1267	1318	1325	1305	1271	1307
27	1578	1547	1519	1601	1376	1387	1412	1425	1396	1399	1438	1378	1378	1370	1423	1385	1401	1388	1370	1359	1356	1341	1336	1298	1317	1347	1317	1349	1352	1334	1359	1356	1327	1330	1322	1327	1424	1342	1355	1385	1333	1333	1312	1320	1371	1356	1358	1320	1360
42	1495	1460	1454	1510	1285	1326	1339	1350	1307	1334	1349	1313	1313	1281	1334	1300	1310	1331	1281	1268	1265	1250	1241	1207	1226	1254	1228	1256	1259	1241	1266	1263	1236	1239	1235	1236	1333	1255	1268	1292	1256	1256	1221	1229	1286	1269	1263	1231	1273
85	1501	1460	1438	1516	1293	1330	1343	1354	1323	1340	1355	1321	1321	1291	1340	1302	1316	1341	1285	1272	1271	1260	1247	1215	1230	1260	1236	1262	1265	1249	1272	1269	1242	1243	1239	1240	1337	1263	1276	1296	1262	1262	1227	1235	1288	1287	1269	1245	1277
3959	1489	1450	1426	1504	1285	1326	1331	1342	1307	1328	1351	1315	1315	1299	1330	1300	1328	1327	1281	1260	1261	1266	1237	1223	1222	1250	1226	1256	1259	1239	1264	1261	1234	1233	1229	1228	1329	1267	1280	1284	1250	1250	1219	1227	1280	1289	1261	1229	1267
266	1529	1488	1464	1540	1319	1362	1367	1378	1339	1366	1385	1347	1347	1313	1368	1336	1342	1359	1313	1296	1295	1280	1269	1237	1256	1284	1262	1292	1295	1275	1300	1297	1270	1271	1267	1264	1365	1285	1298	1322	1288	1288	1255	1263	1316	1301	1297	1261	1303
199	1577	1540	1510	1592	1371	1386	1403	1416	1391	1392	1435	1373	1373	1365	1418	1388	1394	1385	1365	1348	1347	1332	1321	1289	1308	1336	1312	1344	1347	1327	1352	1349	1322	1323	1315	1316	1417	1335	1348	1374	1324	1324	1307	1315	1366	1353	1349	1313	1353
5230	1585	1556	1518	1600	1379	1392	1411	1426	1399	1400	1441	1381	1381	1373	1426	1396	1404	1393	1373	1358	1355	1340	1331	1297	1316	1344	1320	1352	1355	1335	1360	1357	1330	1331	1323	1324	1425	1343	1356	1382	1332	1332	1315	1323	1374	1361	1359	1321	1361
5208	1584	1555	1517	1599	1380	1393	1410	1423	1398	1399	1442	1380	1380	1372	1425	1395	1403	1392	1372	1357	1356	1341	1330	1296	1315	1343	1321	1351	1354	1336	1359	1356	1331	1332	1324	1323	1424	1342	1355	1383	1331	1331	1316	1324	1375	1360	1358	1320	1362
2054	1569	1532	1502	1584	1363	1378	1395	1406	1383	1384	1427	1365	1365	1357	1410	1378	1388	1377	1357	1342	1339	1324	1315	1281	1300	1328	1302	1336	1339	1319	1344	1341	1312	1315	1307	1308	1409	1327	1340	1366	1316	1316	1299	1307	1358	1345	1341	1305	1345
2198	1573	1538	1508	1590	1369	1384	1401	1412	1389	1388	1433	1371	1371	1363	1416	1384	1392	1383	1363	1346	1345	1330	1319	1287	1306	1334	1308	1342	1345	1325	1350	1347	1318	1321	1313	1314	1415	1333	1346	1372	1322	1322	1305	1313	1364	1351	1347	1311	1351
2076	1571	1534	1504	1586	1365	1380	1397	1408	1385	1386	1429	1367	1367	1359	1412	1380	1390	1379	1359	1344	1341	1326	1317	1283	1302	1330	1304	1338	1341	1321	1346	1343	1314	1317	1309	1310	1411	1329	1342	1368	1318	1318	1301	1309	1360	1347	1343	1307	1347
2381	1589	1548	1520	1578	1383	1372	1387	1398	1403	1378	1421	1385	1385	1351	1406	1372	1382	1373	1379	1338	1331	1318	1311	1297	1314	1324	1320	1330	1333	1339	1338	1335	1306	1309	1303	1302	1403	1323	1336	1362	1312	1312	1295	1303	1352	1339	1337	1299	1341
2420	1586	1545	1517	1575	1380	1369	1384	1395	1400	1375	1418	1382	1382	1348	1403	1369	1381	1370	1376	1335	1328	1315	1308	1296	1313	1321	1317	1327	1330	1336	1335	1332	1303	1306	1300	1299	1400	1320	1333	1359	1309	1309	1292	1300	1349	1336	1334	1296	1338
2406	1581	1542	1512	1570	1375	1364	1381	1392	1395	1370	1413	1377	1377	1345	1398	1364	1376	1365	1371	1330	1325	1312	1303	1293	1310	1316	1312	1322	1325	1331	1330	1327	1298	1301	1295	1294	1395	1315	1328	1354	1304	1304	1287	1295	1344	1333	1329	1293	1333
2377	1583	1544	1514	1572	1377	1366	1383	1394	1397	1372	1415	1379	1379	1347	1400	1366	1378	1367	1373	1332	1327	1314	1305	1295	1312	1318	1314	1324	1327	1333	1332	1329	1300	1303	1297	1296	1397	1317	1330	1356	1306	1306	1289	1297	1346	1335	1331	1295	1335
2382	1591	1550	1524	1582	1387	1376	1391	1402	1407	1382	1425	1389	1389	1355	1410	1376	1384	1377	1383	1340	1335	1322	1313	1301	1318	1328	1324	1334	1337	1343	1342	1339	1310	1313	1307	1306	1407	1327	1340	1366	1316	1316	1299	1307	1356	1343	1341	1303	1345
2380	1587	1546	1518	1576	1381	1370	1385	1396	1401	1376	1419	1383	1383	1349	1404	1370	1380	1371	1377	1336	1329	1316	1309	1295	1312	1322	1318	1328	1331	1337	1336	1333	1304	1307	1301	1300	1401	1321	1334	1360	1310	1310	1293	1301	1350	1337	1335	1297	1339
2407	1588	1545	1519	1577	1382	1371	1388	1399	1402	1377	1420	1384	1384	1352	1405	1371	1381	1372	1378	1337	1332	1319	1310	1298	1315	1323	1319	1329	1332	1338	1337	1334	1305	1308	1302	1301	1402	1322	1335	1361	1311	1311	1294	1302	1351	1340	1336	1300	1340
2421	1578	1541	1511	1569	1374	1363	1380	1391	1394	1369	1412	1376	1376	1344	1397	1363	1375	1364	1370	1329	1324	1311	1302	1292	1309	1315	1311	1321	1324	1330	1329	1326	1297	1300	1294	1293	1394	1314	1327	1353	1303	1303	1286	1294	1343	1332	1328	1292	1332
185	1545	1486	1462	1542	1335	1340	1369	1384	1351	1352	1389	1327	1327	1321	1374	1338	1342	1339	1319	1328	1315	1300	1295	1259	1278	1312	1296	1328	1331	1309	1338	1335	1304	1309	1303	1302	1367	1323	1334	1358	1316	1316	1295	1301	1354	1329	1325	1309	1329
88	1536	1483	1461	1537	1332	1335	1366	1381	1346	1349	1384	1324	1324	1320	1371	1331	1339	1328	1316	1331	1316	1301	1296	1262	1281	1313	1297	1329	1332	1310	1339	1336	1305	1310	1302	1305	1364	1326	1335	1359	1317	1317	1296	1302	1355	1322	1326	1302	1330
69	1407	1338	1318	1396	1181	1212	1231	1238	1205	1216	1239	1207	1207	1197	1220	1184	1214	1223	1171	1182	1177	1186	1161	1143	1138	1170	1154	1178	1181	1165	1186	1183	1158	1161	1159	1158	1219	1201	1210	1206	1178	1178	1149	1155	1218	1211	1183	1165	1183
64	1486	1439	1429	1499	1290	1301	1332	1341	1304	1311	1340	1300	1300	1298	1323	1287	1319	1310	1282	1269	1262	1267	1244	1228	1227	1263	1237	1261	1264	1250	1271	1268	1241	1244	1238	1243	1324	1274	1287	1289	1269	1269	1232	1240	1295	1282	1270	1240	1270
109	1429	1388	1394	1444	1235	1246	1281	1290	1247	1256	1283	1245	1245	1241	1266	1234	1266	1261	1223	1208	1207	1212	1183	1167	1166	1202	1180	1204	1207	1193	1212	1209	1184	1187	1181	1186	1269	1219	1232	1234	1212	1212	1173	1181	1240	1227	1213	1185	1213
107	1431	1374	1376	1426	1211	1236	1257	1266	1223	1240	1267	1221	1221	1197	1250	1216	1224	1243	1201	1214	1207	1194	1183	1149	1166	1198	1180	1208	1211	1193	1216	1213	1188	1193	1189	1184	1255	1211	1222	1242	1218	1218	1179	1185	1248	1209	1211	1181	1219
68	1417	1356	1354	1410	1195	1226	1239	1250	1217	1230	1249	1211	1211	1181	1232	1198	1214	1239	1187	1194	1183	1174	1159	1129	1142	1174	1166	1186	1189	1175	1194	1191	1168	1171	1171	1166	1235	1199	1210	1216	1188	1188	1159	1165	1230	1197	1193	1171	1195
129	1584	1553	1529	1611	1398	1397	1432	1443	1412	1407	1448	1388	1388	1378	1433	1395	1411	1396	1384	1383	1364	1349	1348	1308	1327	1359	1339	1369	1372	1356	1379	1376	1351	1354	1342	1347	1432	1364	1377	1399	1355	1355	1336	1344	1399	1362	1376	1338	1378
306	1485	1450	1420	1500	1297	1296	1329	1340	1307	1304	1345	1291	1291	1297	1330	1290	1326	1299	1279	1276	1267	1274	1247	1229	1226	1262	1240	1266	1269	1251	1274	1271	1248	1245	1241	1248	1331	1291	1304	1294	1254	1254	1235	1243	1302	1287	1273	1245	1271
130	1545	1510	1480	1560	1351	1356	1383	1394	1363	1362	1401	1341	1341	1335	1390	1348	1368	1359	1337	1332	1323	1314	1297	1267	1280	1314	1298	1324	1327	1309	1332	1329	1306	1305	1301	1302	1391	1335	1348	1356	1314	1314	1293	1301	1360	1323	1331	1299	1331
4679	1566	1511	1483	1563	1358	1355	1388	1403	1372	1367	1404	1346	1346	1340	1393	1355	1373	1358	1352	1369	1348	1333	1328	1286	1305	1339	1323	1349	1352	1338	1357	1354	1333	1332	1326	1329	1392	1344	1355	1379	1337	1337	1320	1328	1381	1348	1360	1326	1360
4678	1553	1494	1466	1546	1339	1336	1369	1380	1353	1350	1385	1327	1327	1321	1374	1336	1354	1339	1333	1352	1331	1316	1311	1269	1288	1322	1306	1332	1335	1319	1340	1337	1316	1315	1309	1312	1373	1327	1338	1362	1320	1320	1303	1309	1364	1331	1337	1309	1343
126	1572	1539	1507	1561	1382	1351	1380	1393	1390	1363	1400	1370	1370	1340	1393	1351	1367	1354	1370	1333	1318	1305	1296	1288	1305	1315	1317	1323	1326	1338	1331	1328	1309	1304	1300	1309	1390	1320	1333	1353	1313	1313	1290	1298	1353	1322	1332	1294	1328
30	1581	1558	1530	1604	1393	1400	1427	1442	1411	1412	1453	1391	1391	1381	1438	1398	1412	1395	1383	1374	1365	1350	1345	1303	1322	1356	1336	1368	1373	1355	1376	1373	1346	1349	1341	1346	1439	1365	1378	1394	1356	1356	1333	1341	1398	1365	1373	1341	1373
193	1563	1538	1508	1586	1373	1376	1407	1422	1387	1388	1429	1367	1367	1357	1414	1374	1386	1373	1359	1352	1341	1326	1319	1283	1302	1336	1316	1348	1351	1333	1356	1353	1326	1327	1319	1324	1415	1343	1356	1374	1334	1334	1313	1321	1376	1343	1353	1319	1349
22	1516	1485	1463	1535	1340	1367	1386	1395	1348	1371	1390	1360	1360	1344	1373	1337	1361	1366	1316	1309	1308	1313	1282	1270	1269	1299	1285	1307	1310	1296	1315	1312	1289	1288	1280	1289	1376	1328	1341	1335	1309	1309	1276	1284	1343	1330	1312	1280	1312
105	1486	1457	1421	1499	1296	1299	1322	1335	1302	1305	1346	1284	1284	1280	1331	1295	1305	1298	1278	1275	1266	1253	1242	1208	1225	1257	1247	1269	1272	1256	1277	1274	1251	1248	1240	1245	1334	1274	1287	1299	1257	1257	1240	1246	1309	1268	1274	1238	1276
80	1443	1414	1378	1458	1257	1258	1285	1298	1265	1264	1307	1253	1253	1265	1288	1254	1286	1261	1243	1234	1231	1238	1211	1193	1190	1224	1208	1230	1233	1217	1238	1235	1212	1207	1199	1212	1293	1253	1266	1256	1216	1216	1201	1207	1270	1255	1235	1207	1237
106	1432	1403	1379	1453	1244	1271	1290	1303	1260	1281	1300	1266	1266	1250	1283	1245	1275	1276	1230	1215	1208	1213	1188	1184	1183	1211	1189	1217	1220	1202	1225	1222	1195	1194	1190	1191	1280	1228	1241	1239	1215	1215	1182	1190	1247	1236	1224	1192	1216
188	1487	1454	1434	1506	1293	1324	1341	1354	1307	1334	1351	1313	1313	1281	1336	1296	1304	1325	1279	1268	1257	1242	1239	1209	1228	1258	1240	1268	1271	1253	1278	1275	1246	1249	1245	1242	1331	1261	1274	1294	1270	1270	1233	1241	1298	1263	1275	1239	1267
194	1427	1380	1356	1430	1219	1244	1261	1274	1241	1250	1275	1229	1229	1203	1256	1220	1232	1251	1207	1224	1209	1196	1191	1151	1168	1198	1188	1212	1215	1199	1222	1219	1194	1195	1189	1188	1257	1215	1226	1242	1222	1222	1181	1187	1250	1215	1217	1185	1225
108	1404	1381	1367	1425	1216	1243	1262	1275	1228	1251	1268	1232	1232	1216	1249	1217	1245	1254	1202	1189	1182	1187	1156	1148	1147	1175	1159	1185	1188	1172	1193	1190	1169	1166	1160	1161	1250	1202	1215	1213	1183	1183	1152	1160	1221	1204	1192	1158	1192
186	1557	1530	1498	1580	1369	1370	1401	1416	1379	1380	1421	1359	1359	1353	1406	1372	1380	1369	1351	1348	1337	1322	1313	1279	1298	1328	1314	1342	1345	1329	1354	1351	1326	1325	1315	1318	1405	1337	1350	1372	1328	1328	1309	1317	1372	1337	1351	1311	1345
67	1492	1467	1433	1515	1308	1311	1340	1351	1318	1313	1360	1296	1296	1292	1341	1307	1315	1312	1290	1289	1278	1265	1254	1218	1235	1269	1255	1281	1284	1266	1293	1290	1261	1262	1252	1261	1344	1284	1297	1313	1269	1269	1248	1254	1319	1280	1286	1254	1284
28	1415	1384	1374	1430	1219	1252	1271	1280	1229	1254	1275	1235	1235	1205	1258	1226	1234	1261	1207	1206	1193	1180	1173	1137	1154	1184	1170	1196	1199	1181	1206	1203	1178	1179	1175	1174	1259	1201	1214	1230	1202	1202	1165	1171	1238	1195	1201	1173	1205
213	1443	1388	1360	1440	1231	1260	1277	1290	1247	1266	1289	1251	1251	1233	1266	1228	1256	1265	1215	1226	1217	1220	1197	1181	1182	1214	1198	1224	1227	1207	1234	1231	1202	1201	1197	1200	1265	1235	1246	1250	1226	1226	1187	1193	1254	1243	1223	1201	1225
198	1440	1391	1365	1439	1230	1251	1276	1289	1256	1261	1284	1252	1252	1238	1267	1229	1263	1260	1220	1231	1222	1225	1210	1192	1193	1227	1197	1225	1228	1208	1237	1234	1203	1202	1198	1207	1266	1236	1247	1251	1233	1233	1188	1194	1255	1250	1226	1208	1232
180	1477	1430	1406	1478	1263	1286	1307	1320	1283	1300	1317	1277	1277	1245	1304	1262	1282	1291	1255	1270	1251	1236	1237	1205	1224	1254	1230	1262	1265	1245	1272	1269	1238	1239	1235	1238	1303	1253	1264	1290	1270	1270	1223	1229	1288	1251	1265	1231	1267
204	1439	1394	1386	1436	1223	1248	1271	1284	1235	1258	1277	1237	1237	1207	1262	1226	1238	1253	1207	1224	1209	1194	1191	1157	1176	1206	1188	1218	1221	1201	1230	1227	1196	1199	1195	1194	1261	1213	1224	1248	1230	1230	1181	1187	1250	1213	1219	1191	1221
187	1485	1440	1404	1492	1279	1280	1309	1324	1295	1290	1335	1273	1273	1279	1314	1276	1308	1287	1267	1276	1267	1270	1249	1235	1236	1270	1246	1276	1279	1259	1286	1283	1252	1251	1243	1252	1317	1283	1294	1302	1260	1260	1237	1243	1302	1287	1279	1249	1273
200	1453	1406	1402	1452	1239	1262	1285	1296	1255	1272	1293	1253	1253	1219	1278	1242	1260	1273	1231	1240	1227	1212	1207	1181	1200	1230	1206	1238	1241	1221	1244	1241	1212	1217	1213	1216	1281	1231	1242	1266	1244	1244	1199	1205	1268	1225	1239	1207	1239
201	1485	1436	1422	1486	1267	1274	1303	1318	1285	1282	1323	1261	1261	1253	1308	1270	1284	1285	1263	1272	1259	1244	1241	1209	1228	1264	1238	1266	1269	1249	1274	1271	1242	1247	1243	1248	1311	1263	1276	1298	1254	1254	1231	1237	1298	1261	1269	1245	1267
173	1427	1380	1376	1426	1215	1226	1261	1272	1229	1236	1267	1223	1223	1217	1250	1214	1252	1243	1209	1212	1205	1210	1187	1179	1178	1212	1180	1212	1215	1195	1218	1215	1186	1189	1185	1190	1255	1223	1234	1240	1220	1220	1175	1181	1240	1223	1215	1187	1215
66	1464	1413	1389	1459	1250	1261	1296	1309	1270	1275	1300	1262	1262	1252	1285	1245	1281	1272	1242	1255	1240	1245	1230	1210	1209	1245	1217	1245	1248	1230	1253	1250	1223	1222	1216	1227	1286	1258	1269	1273	1255	1255	1210	1216	1275	1262	1250	1222	1252
178	1487	1466	1432	1510	1303	1308	1335	1348	1313	1314	1353	1291	1291	1289	1340	1314	1330	1309	1285	1284	1269	1256	1261	1225	1242	1262	1248	1276	1279	1259	1286	1285	1256	1255	1245	1254	1347	1279	1292	1304	1276	1276	1243	1251	1310	1269	1281	1257	1277
183	1533	1510	1478	1556	1347	1348	1377	1392	1357	1360	1395	1335	1335	1333	1384	1358	1376	1353	1333	1326	1311	1296	1303	1269	1288	1306	1290	1320	1323	1303	1330	1329	1302	1301	1291	1300	1389	1315	1328	1348	1320	1320	1287	1295	1346	1313	1325	1301	1319
5521	1452	1431	1405	1475	1276	1283	1316	1329	1286	1291	1320	1276	1276	1278	1305	1271	1303	1290	1254	1247	1240	1247	1216	1208	1205	1233	1217	1243	1246	1230	1253	1250	1225	1224	1214	1219	1308	1260	1273	1271	1253	1253	1212	1220	1275	1264	1250	1214	1248
192	1397	1374	1344	1418	1215	1240	1267	1278	1229	1250	1265	1237	1237	1221	1250	1216	1242	1245	1199	1192	1185	1190	1165	1149	1148	1182	1156	1184	1187	1169	1192	1189	1164	1163	1159	1166	1253	1205	1216	1212	1186	1186	1155	1163	1220	1207	1191	1163	1193
65	1411	1386	1354	1430	1229	1250	1273	1284	1241	1258	1279	1239	1239	1233	1260	1226	1258	1253	1209	1204	1195	1202	1173	1161	1158	1186	1172	1196	1199	1183	1206	1203	1178	1177	1171	1172	1265	1221	1232	1224	1198	1198	1167	1175	1234	1217	1203	1167	1203
2707	1532	1509	1473	1553	1350	1347	1378	1393	1358	1359	1396	1336	1336	1332	1383	1347	1361	1346	1328	1327	1314	1301	1292	1260	1277	1307	1291	1319	1322	1306	1329	1326	1301	1302	1292	1295	1384	1316	1329	1349	1307	1307	1288	1296	1349	1316	1326	1286	1322
94	1467	1440	1410	1484	1277	1304	1323	1336	1287	1314	1327	1291	1291	1261	1314	1276	1290	1305	1259	1256	1241	1228	1221	1191	1208	1236	1220	1248	1251	1233	1258	1255	1230	1229	1223	1224	1313	1247	1260	1276	1252	1252	1215	1223	1278	1245	1253	1215	1251
368	1525	1504	1464	1544	1337	1334	1365	1380	1349	1346	1383	1323	1323	1321	1372	1334	1350	1341	1319	1316	1301	1290	1281	1249	1264	1296	1278	1306	1309	1293	1316	1313	1290	1289	1281	1282	1371	1305	1318	1338	1296	1296	1277	1285	1336	1307	1315	1279	1311
1782	1507	1490	1450	1530	1325	1324	1355	1370	1337	1336	1373	1313	1313	1311	1362	1324	1338	1327	1307	1306	1289	1276	1271	1237	1254	1286	1266	1296	1299	1281	1306	1303	1276	1277	1269	1272	1361	1295	1306	1326	1286	1286	1265	1273	1324	1293	1303	1265	1299
175	1485	1468	1430	1510	1311	1304	1337	1352	1321	1318	1355	1299	1299	1311	1340	1306	1338	1307	1289	1284	1275	1280	1253	1239	1238	1268	1250	1278	1281	1265	1288	1285	1260	1259	1249	1254	1343	1291	1304	1306	1264	1264	1247	1255	1308	1297	1285	1249	1281
1879	1474	1455	1421	1495	1292	1317	1336	1349	1300	1327	1340	1304	1304	1274	1327	1289	1303	1320	1270	1269	1256	1243	1234	1204	1221	1249	1235	1261	1264	1248	1271	1268	1243	1244	1238	1237	1326	1260	1273	1291	1265	1265	1230	1238	1293	1258	1268	1228	1266
4719	1494	1471	1437	1513	1312	1337	1356	1371	1320	1347	1360	1324	1324	1292	1347	1309	1323	1340	1290	1289	1276	1263	1252	1224	1241	1269	1253	1281	1284	1268	1289	1286	1261	1262	1256	1257	1346	1280	1293	1309	1283	1283	1250	1258	1313	1278	1290	1248	1286
196	1499	1480	1460	1524	1317	1316	1345	1360	1325	1326	1363	1303	1303	1297	1350	1316	1328	1321	1297	1294	1281	1268	1257	1227	1244	1274	1260	1286	1289	1273	1294	1291	1268	1269	1259	1262	1351	1285	1298	1316	1272	1272	1255	1263	1322	1283	1293	1255	1291
205	1501	1480	1458	1522	1311	1314	1345	1358	1319	1320	1361	1299	1299	1293	1346	1314	1324	1319	1295	1292	1279	1264	1255	1221	1240	1270	1256	1284	1287	1267	1292	1289	1264	1263	1257	1260	1349	1283	1296	1312	1270	1270	1249	1257	1318	1281	1287	1257	1287
2255	1553	1530	1500	1580	1357	1366	1389	1404	1377	1380	1419	1357	1357	1345	1404	1364	1380	1369	1351	1338	1331	1316	1313	1275	1294	1326	1296	1332	1335	1313	1336	1333	1306	1305	1297	1306	1403	1321	1334	1364	1314	1314	1291	1299	1354	1333	1335	1299	1339
2302	1467	1440	1414	1496	1273	1306	1317	1330	1295	1320	1337	1301	1301	1281	1318	1276	1314	1317	1269	1250	1247	1252	1229	1213	1212	1242	1212	1246	1249	1227	1250	1247	1220	1217	1213	1220	1317	1253	1266	1276	1242	1242	1205	1213	1270	1271	1249	1217	1255
208	1540	1517	1483	1567	1340	1351	1374	1389	1362	1365	1404	1342	1342	1330	1389	1349	1367	1354	1336	1323	1316	1301	1298	1260	1279	1311	1281	1317	1320	1298	1321	1318	1291	1290	1282	1291	1390	1306	1319	1349	1297	1297	1276	1284	1339	1318	1320	1284	1324
197	1512	1489	1453	1539	1312	1321	1344	1359	1344	1335	1374	1314	1314	1304	1359	1319	1341	1334	1308	1293	1286	1275	1268	1234	1249	1281	1253	1287	1290	1270	1291	1288	1261	1260	1252	1261	1360	1280	1293	1319	1267	1267	1246	1254	1309	1300	1290	1264	1294
2289	1545	1522	1492	1572	1347	1358	1381	1396	1369	1372	1411	1349	1349	1339	1396	1356	1372	1361	1343	1330	1323	1308	1307	1267	1286	1318	1288	1324	1327	1305	1330	1327	1298	1299	1291	1298	1395	1313	1326	1358	1306	1306	1283	1291	1346	1325	1327	1291	1331
191	1548	1523	1491	1577	1350	1359	1382	1397	1372	1375	1414	1352	1352	1340	1399	1357	1371	1364	1346	1331	1326	1311	1306	1268	1287	1321	1291	1327	1330	1308	1331	1328	1301	1300	1292	1301	1398	1314	1327	1359	1307	1307	1286	1294	1349	1328	1330	1294	1334
1768	1453	1430	1398	1480	1253	1268	1289	1302	1277	1276	1319	1257	1257	1265	1298	1264	1300	1273	1253	1234	1231	1236	1215	1193	1192	1224	1196	1228	1231	1209	1234	1231	1202	1203	1195	1202	1305	1243	1256	1262	1208	1208	1189	1197	1260	1253	1231	1201	1239
272	1496	1473	1439	1521	1292	1309	1330	1343	1314	1317	1358	1294	1294	1282	1341	1305	1321	1310	1290	1277	1270	1255	1252	1212	1231	1263	1237	1269	1272	1250	1273	1270	1243	1244	1236	1243	1346	1266	1279	1303	1249	1249	1230	1238	1301	1270	1272	1238	1280
13	1570	1549	1515	1597	1378	1387	1408	1423	1396	1399	1438	1376	1376	1366	1423	1385	1399	1390	1370	1357	1354	1339	1332	1296	1315	1345	1319	1351	1354	1336	1359	1356	1331	1330	1322	1327	1424	1342	1355	1389	1335	1335	1314	1322	1377	1352	1358	1318	1360
86	1503	1480	1448	1532	1305	1314	1337	1354	1329	1328	1369	1309	1309	1317	1350	1312	1350	1321	1305	1284	1281	1286	1265	1245	1244	1276	1244	1280	1283	1261	1286	1283	1256	1253	1245	1254	1353	1287	1300	1312	1260	1260	1239	1247	1302	1305	1285	1251	1287
1963	1535	1512	1478	1562	1335	1346	1369	1384	1357	1360	1399	1337	1337	1325	1384	1344	1362	1349	1331	1318	1311	1296	1293	1255	1274	1306	1276	1312	1315	1293	1316	1313	1286	1285	1277	1286	1385	1301	1314	1344	1292	1292	1271	1279	1334	1313	1315	1279	1319
2025	1537	1514	1480	1564	1337	1348	1371	1386	1359	1362	1401	1339	1339	1327	1386	1346	1364	1351	1333	1320	1313	1298	1295	1257	1276	1308	1278	1314	1317	1295	1318	1315	1288	1287	1279	1288	1387	1303	1316	1346	1294	1294	1273	1281	1336	1315	1317	1281	1321
2073	1540	1517	1483	1567	1340	1349	1372	1387	1360	1363	1402	1340	1340	1328	1387	1347	1365	1352	1336	1321	1314	1299	1296	1258	1277	1309	1279	1315	1318	1296	1319	1316	1291	1288	1280	1289	1388	1304	1317	1347	1297	1297	1274	1282	1337	1316	1318	1282	1322
2009	1520	1497	1465	1547	1318	1329	1352	1367	1340	1343	1382	1320	1320	1310	1367	1327	1345	1332	1316	1301	1294	1279	1278	1238	1257	1289	1259	1295	1298	1276	1301	1298	1271	1270	1262	1269	1368	1284	1297	1329	1277	1277	1254	1262	1317	1296	1298	1262	1302
3007	1533	1510	1478	1560	1333	1344	1367	1382	1355	1358	1397	1335	1335	1325	1382	1342	1360	1347	1329	1316	1309	1294	1293	1253	1272	1304	1274	1310	1313	1291	1316	1313	1284	1285	1277	1284	1383	1299	1312	1344	1292	1292	1269	1277	1332	1311	1313	1277	1317
3006	1533	1510	1478	1560	1333	1344	1367	1382	1355	1358	1397	1335	1335	1325	1382	1342	1360	1347	1329	1316	1309	1294	1293	1253	1272	1304	1274	1310	1313	1291	1316	1313	1284	1285	1277	1284	1383	1299	1312	1344	1292	1292	1269	1277	1332	1311	1313	1277	1317
2038	1481	1458	1426	1510	1293	1294	1325	1340	1313	1308	1349	1289	1289	1299	1330	1292	1330	1301	1283	1272	1261	1266	1245	1227	1226	1258	1234	1270	1273	1251	1276	1273	1244	1243	1235	1244	1333	1279	1290	1294	1250	1250	1229	1237	1292	1285	1273	1241	1267
210	1454	1433	1397	1477	1278	1275	1306	1319	1288	1283	1324	1266	1266	1280	1307	1275	1305	1276	1256	1253	1244	1251	1220	1206	1203	1235	1221	1245	1248	1232	1253	1250	1227	1224	1214	1221	1314	1270	1281	1271	1229	1229	1216	1224	1283	1266	1252	1216	1250
49	1508	1489	1451	1531	1328	1329	1358	1371	1334	1335	1376	1314	1314	1308	1361	1327	1339	1326	1306	1307	1294	1281	1270	1238	1255	1285	1273	1297	1300	1284	1305	1302	1279	1278	1268	1273	1366	1302	1315	1325	1283	1283	1268	1276	1335	1294	1304	1264	1302
207	1456	1435	1413	1481	1272	1283	1316	1327	1280	1291	1324	1270	1270	1256	1307	1275	1281	1282	1252	1249	1238	1225	1216	1184	1201	1229	1217	1245	1248	1230	1251	1248	1225	1226	1216	1219	1310	1244	1257	1273	1253	1253	1214	1222	1281	1242	1250	1210	1246
5270	1468	1443	1421	1489	1284	1297	1328	1341	1292	1305	1334	1282	1282	1264	1317	1283	1293	1298	1262	1261	1250	1237	1224	1196	1213	1241	1229	1255	1258	1240	1261	1258	1235	1234	1224	1229	1322	1258	1271	1281	1263	1263	1224	1232	1291	1252	1262	1220	1260
5296	1485	1462	1428	1510	1307	1300	1333	1348	1317	1314	1353	1295	1295	1305	1336	1304	1332	1303	1285	1278	1271	1276	1245	1235	1234	1264	1246	1276	1279	1261	1282	1279	1258	1253	1243	1250	1339	1287	1300	1300	1258	1258	1243	1251	1304	1295	1281	1245	1277
1889	1422	1393	1373	1441	1234	1249	1278	1289	1246	1257	1288	1238	1238	1238	1267	1237	1267	1254	1220	1209	1204	1211	1180	1168	1165	1193	1181	1205	1208	1192	1211	1208	1187	1184	1174	1181	1274	1226	1239	1233	1213	1213	1176	1184	1245	1226	1212	1176	1212
179	1436	1415	1393	1461	1252	1275	1294	1305	1262	1285	1308	1262	1262	1236	1291	1257	1265	1278	1236	1229	1222	1209	1196	1168	1185	1211	1199	1225	1228	1212	1231	1228	1207	1206	1200	1201	1294	1226	1239	1255	1231	1231	1196	1204	1263	1222	1232	1192	1230
87	1458	1433	1413	1479	1270	1287	1316	1327	1286	1295	1324	1272	1272	1254	1307	1275	1287	1286	1260	1253	1240	1227	1220	1184	1201	1229	1219	1245	1248	1230	1249	1246	1225	1224	1214	1219	1312	1246	1259	1273	1253	1253	1214	1222	1283	1242	1250	1210	1256
4114	1462	1437	1417	1483	1274	1291	1320	1331	1290	1299	1328	1276	1276	1258	1311	1279	1291	1290	1264	1257	1244	1231	1224	1188	1205	1233	1223	1249	1252	1234	1253	1250	1229	1228	1218	1223	1316	1250	1263	1277	1257	1257	1218	1226	1287	1246	1254	1214	1260
99	1459	1432	1412	1484	1277	1286	1315	1328	1297	1296	1329	1277	1277	1281	1310	1278	1310	1295	1269	1254	1245	1250	1225	1211	1210	1236	1222	1250	1253	1235	1254	1251	1230	1227	1217	1224	1313	1263	1274	1276	1252	1252	1217	1225	1282	1269	1255	1219	1257
48	1501	1472	1454	1522	1313	1328	1357	1370	1329	1338	1365	1315	1315	1295	1350	1316	1328	1329	1303	1294	1281	1266	1261	1225	1244	1272	1260	1288	1291	1273	1292	1289	1268	1267	1257	1262	1351	1281	1294	1316	1296	1296	1255	1263	1320	1283	1293	1253	1297
182	1480	1453	1427	1503	1298	1323	1342	1355	1306	1333	1346	1310	1310	1276	1335	1295	1309	1328	1280	1277	1262	1247	1242	1208	1227	1257	1241	1269	1272	1256	1277	1274	1253	1250	1244	1247	1334	1264	1277	1299	1271	1271	1234	1242	1299	1258	1278	1234	1272
5536	1479	1456	1428	1504	1297	1322	1341	1354	1305	1332	1345	1309	1309	1275	1334	1294	1310	1327	1279	1276	1261	1246	1241	1209	1228	1256	1240	1268	1271	1255	1276	1273	1252	1249	1243	1246	1335	1263	1276	1298	1270	1270	1235	1243	1298	1257	1277	1233	1271
74	1528	1507	1475	1557	1350	1347	1376	1391	1358	1357	1396	1336	1336	1326	1383	1347	1361	1348	1330	1327	1312	1297	1292	1258	1277	1307	1291	1321	1324	1308	1329	1326	1301	1302	1292	1295	1384	1312	1325	1349	1305	1305	1286	1294	1349	1308	1330	1286	1320
34	1493	1474	1440	1520	1313	1314	1341	1354	1321	1320	1361	1299	1299	1291	1346	1312	1326	1313	1293	1292	1277	1264	1257	1223	1240	1270	1258	1284	1287	1271	1292	1289	1264	1265	1255	1258	1351	1285	1298	1312	1268	1268	1251	1259	1320	1273	1293	1249	1285
29	1524	1505	1471	1553	1344	1347	1372	1387	1354	1355	1396	1334	1334	1322	1379	1341	1359	1346	1328	1323	1312	1297	1290	1256	1275	1305	1289	1317	1320	1304	1325	1322	1297	1298	1288	1293	1384	1310	1323	1349	1303	1303	1284	1292	1345	1306	1326	1282	1320
117	1456	1435	1429	1479	1270	1287	1314	1327	1280	1291	1320	1270	1270	1250	1305	1273	1285	1294	1254	1247	1238	1223	1212	1182	1201	1229	1217	1241	1244	1228	1249	1246	1223	1224	1214	1217	1310	1240	1253	1273	1251	1251	1210	1218	1277	1236	1248	1210	1250
2510	1485	1466	1450	1512	1301	1308	1331	1346	1311	1312	1353	1291	1291	1279	1336	1302	1318	1311	1287	1280	1269	1254	1247	1213	1232	1262	1248	1274	1277	1261	1282	1279	1254	1257	1247	1250	1343	1271	1284	1308	1260	1260	1241	1249	1308	1263	1283	1241	1279
110	1510	1491	1457	1539	1330	1331	1358	1373	1340	1341	1380	1318	1318	1308	1365	1327	1345	1332	1314	1309	1298	1283	1276	1242	1261	1291	1275	1303	1306	1290	1311	1308	1283	1284	1274	1279	1370	1296	1309	1335	1289	1289	1270	1278	1331	1292	1312	1268	1306
116	1510	1491	1457	1539	1328	1331	1356	1371	1338	1339	1380	1318	1318	1306	1363	1325	1343	1330	1314	1307	1296	1281	1274	1240	1259	1289	1273	1301	1304	1288	1309	1306	1283	1282	1272	1277	1368	1294	1307	1333	1287	1287	1268	1276	1329	1290	1310	1266	1304
59	1430	1407	1379	1457	1250	1279	1292	1305	1264	1285	1304	1268	1268	1250	1283	1245	1283	1284	1236	1225	1218	1223	1196	1184	1183	1211	1195	1221	1224	1208	1229	1226	1201	1200	1194	1197	1288	1236	1247	1251	1221	1221	1188	1196	1251	1234	1230	1190	1226
63	1474	1455	1421	1503	1298	1297	1324	1339	1310	1307	1348	1290	1290	1296	1329	1293	1331	1300	1282	1273	1266	1271	1244	1230	1229	1259	1241	1269	1272	1256	1277	1274	1249	1248	1238	1245	1336	1280	1293	1299	1253	1253	1236	1244	1297	1282	1278	1238	1272
40	1434	1413	1409	1461	1250	1275	1292	1305	1260	1283	1302	1260	1260	1228	1287	1251	1265	1280	1236	1229	1218	1203	1196	1162	1181	1211	1195	1223	1226	1210	1231	1228	1203	1206	1200	1199	1292	1218	1231	1257	1231	1231	1190	1198	1255	1212	1232	1190	1230
62	1513	1494	1460	1542	1331	1332	1359	1374	1341	1342	1381	1319	1319	1309	1366	1328	1346	1333	1317	1310	1299	1284	1277	1243	1262	1292	1276	1304	1307	1291	1312	1309	1286	1285	1275	1280	1371	1297	1310	1336	1290	1290	1271	1279	1332	1293	1313	1269	1307
2374	1516	1497	1463	1545	1334	1337	1362	1377	1344	1345	1386	1324	1324	1312	1369	1331	1349	1336	1320	1313	1302	1287	1280	1246	1265	1295	1279	1307	1310	1294	1315	1312	1289	1288	1278	1283	1374	1300	1313	1339	1293	1293	1274	1282	1335	1296	1316	1272	1310
2384	1516	1497	1463	1545	1336	1339	1364	1379	1346	1347	1388	1326	1326	1314	1371	1333	1351	1338	1320	1315	1304	1289	1282	1248	1267	1297	1281	1309	1312	1296	1317	1314	1289	1290	1280	1285	1376	1302	1315	1341	1295	1295	1276	1284	1337	1298	1318	1274	1312
89	1497	1476	1460	1522	1309	1316	1339	1354	1319	1320	1361	1299	1299	1287	1344	1310	1326	1319	1297	1288	1277	1262	1255	1221	1240	1270	1256	1282	1285	1269	1290	1287	1264	1265	1255	1258	1351	1279	1292	1316	1268	1268	1249	1257	1316	1271	1291	1249	1287
202	1527	1506	1472	1554	1345	1346	1373	1388	1355	1356	1395	1333	1333	1323	1380	1342	1360	1347	1329	1324	1313	1298	1291	1257	1276	1306	1290	1318	1321	1305	1326	1323	1298	1299	1289	1294	1383	1311	1324	1350	1304	1304	1283	1291	1346	1307	1327	1283	1321
2256	1497	1476	1460	1522	1311	1314	1341	1356	1321	1322	1359	1299	1299	1289	1346	1312	1328	1321	1297	1290	1279	1264	1257	1223	1242	1272	1256	1284	1287	1271	1292	1289	1264	1267	1257	1260	1351	1281	1294	1318	1270	1270	1249	1257	1318	1273	1293	1251	1289
5451	1504	1483	1465	1529	1316	1319	1348	1361	1324	1327	1366	1304	1304	1292	1351	1317	1331	1324	1300	1295	1282	1267	1260	1226	1245	1275	1261	1289	1292	1276	1295	1292	1269	1272	1260	1265	1354	1286	1299	1319	1273	1273	1254	1262	1323	1278	1298	1256	1292
211	1459	1436	1420	1458	1275	1248	1279	1294	1283	1258	1297	1263	1263	1243	1282	1248	1278	1259	1259	1228	1215	1216	1197	1201	1204	1212	1214	1222	1225	1231	1228	1225	1200	1201	1193	1196	1285	1231	1244	1252	1206	1206	1187	1195	1254	1231	1231	1193	1225
60	1482	1463	1447	1509	1298	1305	1328	1343	1308	1309	1350	1288	1288	1276	1333	1299	1315	1310	1284	1277	1266	1251	1244	1210	1229	1259	1245	1271	1274	1258	1279	1276	1251	1254	1244	1247	1340	1268	1281	1305	1257	1257	1238	1246	1305	1260	1280	1238	1276
73	1471	1448	1420	1496	1287	1316	1331	1344	1297	1324	1339	1301	1301	1265	1324	1284	1302	1321	1271	1266	1255	1240	1233	1201	1220	1248	1234	1260	1263	1247	1268	1265	1240	1241	1235	1236	1327	1255	1268	1292	1262	1262	1227	1235	1290	1249	1269	1225	1265
2430	1520	1501	1467	1549	1338	1341	1366	1381	1348	1349	1390	1328	1328	1316	1373	1335	1353	1340	1324	1317	1306	1291	1284	1250	1269	1299	1283	1311	1314	1298	1319	1316	1293	1292	1282	1287	1378	1304	1317	1343	1297	1297	1278	1286	1339	1300	1320	1276	1314
2375	1521	1502	1468	1550	1339	1342	1367	1382	1349	1350	1391	1329	1329	1317	1374	1336	1354	1341	1325	1318	1307	1292	1285	1251	1270	1300	1284	1312	1315	1299	1320	1317	1294	1293	1283	1288	1379	1305	1318	1344	1298	1298	1279	1287	1340	1301	1321	1277	1315
2416	1522	1503	1469	1551	1342	1345	1370	1385	1352	1353	1394	1332	1332	1320	1377	1339	1357	1344	1326	1321	1310	1295	1288	1254	1273	1303	1287	1315	1318	1302	1323	1320	1295	1296	1286	1291	1382	1308	1321	1347	1301	1301	1282	1290	1343	1304	1324	1280	1318
2431	1517	1498	1464	1546	1335	1338	1363	1378	1345	1346	1387	1325	1325	1313	1370	1332	1350	1337	1321	1314	1303	1288	1281	1247	1266	1296	1280	1308	1311	1295	1316	1313	1290	1289	1279	1284	1375	1301	1314	1340	1294	1294	1275	1283	1336	1297	1317	1273	1311
37	1478	1459	1427	1511	1302	1303	1330	1345	1312	1311	1354	1294	1294	1300	1333	1297	1327	1302	1286	1275	1266	1271	1246	1234	1233	1261	1245	1273	1276	1260	1279	1276	1255	1252	1242	1249	1336	1282	1295	1301	1257	1257	1240	1248	1301	1286	1282	1242	1270
113	1483	1464	1450	1510	1301	1304	1331	1346	1309	1310	1349	1287	1287	1277	1334	1300	1314	1309	1283	1280	1265	1250	1245	1211	1230	1260	1246	1272	1275	1259	1280	1277	1252	1255	1245	1248	1339	1269	1282	1304	1258	1258	1239	1247	1306	1261	1281	1239	1275
2192	1530	1509	1475	1557	1348	1345	1376	1389	1356	1357	1394	1334	1334	1326	1383	1343	1361	1350	1332	1327	1312	1297	1292	1258	1277	1307	1287	1319	1322	1306	1327	1324	1303	1300	1290	1297	1386	1312	1325	1349	1305	1305	1286	1294	1347	1308	1328	1284	1320
3557	1514	1487	1467	1537	1330	1347	1372	1385	1340	1353	1382	1332	1332	1308	1365	1327	1343	1348	1312	1309	1296	1281	1276	1242	1261	1289	1277	1303	1306	1290	1311	1308	1283	1284	1274	1279	1366	1298	1311	1333	1313	1313	1268	1276	1333	1292	1312	1268	1306
2387	1481	1458	1428	1504	1295	1322	1339	1350	1305	1332	1345	1309	1309	1275	1334	1292	1312	1331	1281	1274	1263	1248	1241	1209	1228	1256	1238	1268	1271	1255	1276	1273	1250	1249	1243	1246	1335	1263	1276	1300	1270	1270	1233	1241	1298	1257	1277	1233	1273
2450	1480	1457	1427	1503	1294	1321	1338	1349	1304	1331	1344	1308	1308	1274	1333	1291	1311	1330	1280	1273	1262	1247	1240	1208	1227	1255	1237	1267	1270	1254	1275	1272	1249	1248	1242	1245	1334	1262	1275	1299	1269	1269	1232	1240	1297	1256	1276	1232	1272
36	1443	1418	1410	1466	1257	1286	1301	1314	1267	1292	1307	1271	1271	1235	1294	1258	1274	1297	1243	1234	1223	1208	1201	1169	1188	1216	1202	1230	1233	1217	1238	1235	1208	1213	1207	1204	1297	1225	1238	1262	1230	1230	1195	1203	1264	1217	1239	1197	1235
75	1441	1416	1390	1464	1255	1286	1301	1312	1265	1290	1307	1269	1269	1233	1292	1256	1272	1291	1241	1234	1223	1208	1201	1167	1186	1214	1202	1228	1231	1215	1236	1233	1206	1211	1205	1202	1297	1227	1240	1260	1228	1228	1195	1203	1266	1215	1237	1195	1235
97	1528	1505	1473	1555	1348	1347	1374	1389	1358	1357	1396	1336	1336	1326	1383	1345	1363	1350	1332	1325	1314	1299	1292	1258	1277	1307	1291	1321	1324	1308	1329	1326	1299	1302	1292	1295	1386	1312	1325	1351	1305	1305	1286	1294	1349	1308	1330	1286	1322
254	1489	1466	1452	1514	1305	1308	1333	1348	1315	1314	1353	1293	1293	1283	1340	1306	1322	1315	1291	1282	1271	1256	1249	1215	1234	1264	1250	1278	1281	1265	1286	1283	1256	1261	1251	1252	1345	1273	1286	1310	1262	1262	1243	1251	1312	1265	1287	1245	1281
203	1528	1507	1473	1555	1346	1345	1374	1389	1362	1357	1394	1334	1334	1324	1381	1343	1365	1348	1336	1331	1314	1299	1298	1258	1277	1307	1289	1321	1324	1306	1327	1324	1299	1300	1290	1295	1384	1312	1325	1351	1305	1305	1284	1292	1347	1310	1328	1284	1328
195	1541	1516	1486	1568	1359	1358	1385	1402	1369	1368	1407	1347	1347	1337	1394	1356	1372	1363	1343	1336	1325	1310	1303	1267	1286	1318	1302	1332	1335	1319	1340	1337	1310	1313	1303	1306	1397	1323	1336	1362	1316	1316	1297	1305	1360	1319	1343	1297	1333
189	1489	1462	1436	1512	1305	1324	1343	1358	1321	1334	1353	1311	1311	1283	1340	1302	1322	1331	1295	1290	1273	1258	1257	1217	1236	1266	1250	1280	1283	1265	1286	1283	1258	1259	1253	1254	1343	1273	1286	1310	1274	1274	1243	1251	1308	1269	1287	1243	1289
71	1445	1420	1410	1468	1259	1286	1303	1316	1269	1290	1307	1273	1273	1235	1294	1258	1276	1295	1245	1234	1225	1210	1201	1171	1190	1218	1204	1232	1235	1219	1238	1235	1208	1213	1207	1204	1297	1225	1238	1262	1230	1230	1195	1203	1264	1217	1241	1197	1237
77	1448	1423	1395	1471	1260	1291	1306	1317	1270	1293	1312	1274	1274	1238	1297	1261	1277	1294	1246	1239	1228	1213	1206	1172	1191	1219	1207	1233	1236	1220	1241	1238	1211	1216	1210	1207	1302	1232	1245	1265	1233	1233	1200	1208	1271	1220	1242	1200	1240
72	1447	1422	1394	1470	1259	1290	1305	1316	1269	1292	1311	1273	1273	1237	1296	1260	1276	1293	1245	1238	1227	1212	1205	1171	1190	1218	1206	1232	1235	1219	1240	1237	1210	1215	1209	1206	1301	1231	1244	1264	1232	1232	1199	1207	1270	1219	1241	1199	1239
78	1446	1421	1393	1469	1258	1289	1304	1315	1268	1291	1310	1272	1272	1236	1295	1259	1275	1292	1244	1237	1226	1211	1204	1170	1189	1217	1205	1231	1234	1218	1239	1236	1209	1214	1208	1205	1300	1230	1243	1263	1231	1231	1198	1206	1269	1218	1240	1198	1238
177	1455	1406	1380	1454	1243	1274	1293	1304	1255	1280	1299	1259	1259	1227	1282	1244	1256	1277	1231	1250	1235	1222	1213	1179	1196	1226	1214	1236	1239	1223	1244	1241	1220	1217	1213	1216	1281	1241	1252	1266	1240	1240	1207	1213	1276	1237	1241	1211	1245
209	1543	1522	1484	1568	1363	1360	1387	1402	1379	1372	1411	1351	1351	1339	1396	1358	1378	1361	1349	1342	1327	1314	1309	1279	1296	1328	1304	1334	1337	1319	1342	1339	1316	1313	1303	1308	1399	1329	1342	1360	1318	1318	1303	1311	1364	1325	1341	1299	1343
176	1492	1435	1413	1485	1280	1309	1326	1337	1290	1317	1332	1296	1296	1260	1321	1279	1291	1310	1262	1283	1268	1253	1248	1212	1231	1263	1249	1273	1276	1260	1281	1278	1255	1256	1252	1251	1314	1272	1283	1303	1279	1279	1242	1248	1307	1268	1278	1242	1280
214	1522	1481	1465	1537	1322	1337	1368	1379	1332	1343	1374	1320	1320	1304	1357	1327	1331	1342	1306	1299	1288	1273	1262	1232	1251	1281	1265	1293	1296	1278	1303	1300	1275	1276	1268	1269	1356	1290	1303	1321	1301	1301	1258	1266	1323	1292	1300	1266	1298
206	1508	1475	1453	1529	1316	1351	1368	1379	1328	1357	1372	1336	1336	1296	1361	1319	1329	1352	1306	1299	1284	1269	1264	1230	1249	1281	1261	1297	1300	1278	1301	1298	1271	1274	1270	1271	1354	1288	1301	1325	1297	1297	1258	1266	1321	1284	1300	1264	1298
18	1535	1510	1496	1558	1343	1360	1389	1398	1353	1368	1393	1349	1349	1329	1378	1350	1356	1361	1331	1326	1319	1304	1287	1259	1278	1306	1292	1318	1321	1305	1326	1323	1296	1305	1293	1298	1385	1325	1342	1350	1324	1324	1287	1295	1356	1313	1321	1291	1325
158	1445	1424	1402	1476	1269	1268	1299	1312	1277	1280	1317	1269	1269	1279	1298	1272	1302	1271	1261	1252	1245	1248	1217	1201	1202	1234	1214	1240	1245	1227	1246	1243	1218	1223	1213	1226	1309	1263	1276	1270	1228	1228	1211	1219	1278	1257	1243	1221	1245
25	1523	1500	1492	1546	1343	1344	1373	1386	1351	1352	1389	1341	1341	1331	1374	1346	1360	1347	1331	1326	1319	1304	1287	1253	1272	1310	1292	1316	1321	1303	1322	1319	1290	1299	1289	1298	1385	1321	1336	1344	1300	1300	1285	1293	1354	1309	1319	1293	1319
168	1443	1384	1356	1428	1225	1244	1265	1278	1233	1250	1265	1241	1241	1229	1254	1216	1246	1255	1209	1220	1213	1218	1191	1177	1176	1208	1186	1214	1217	1195	1222	1219	1192	1193	1193	1194	1251	1231	1244	1240	1218	1218	1179	1185	1242	1239	1215	1193	1217
314	1475	1444	1416	1492	1281	1278	1309	1324	1293	1288	1327	1273	1273	1285	1314	1278	1308	1283	1267	1258	1253	1258	1229	1213	1212	1244	1224	1252	1255	1239	1262	1259	1236	1235	1231	1230	1311	1271	1286	1282	1244	1244	1221	1229	1280	1277	1259	1231	1257
305	1415	1382	1362	1434	1221	1246	1265	1278	1239	1254	1269	1239	1239	1225	1254	1218	1252	1259	1207	1198	1191	1198	1169	1157	1154	1182	1166	1192	1195	1179	1202	1199	1176	1175	1169	1170	1251	1215	1230	1220	1198	1198	1159	1167	1222	1221	1197	1173	1199
386	1480	1445	1429	1497	1284	1311	1330	1343	1300	1317	1332	1302	1302	1268	1321	1283	1297	1312	1272	1267	1254	1239	1236	1204	1223	1251	1231	1257	1260	1244	1267	1264	1239	1242	1236	1235	1316	1258	1273	1285	1263	1263	1224	1232	1287	1254	1262	1228	1266
2194	1446	1393	1365	1443	1234	1229	1262	1277	1254	1237	1276	1226	1226	1238	1265	1229	1263	1240	1224	1237	1224	1229	1206	1188	1187	1219	1199	1225	1228	1212	1235	1232	1205	1208	1200	1205	1264	1242	1255	1253	1215	1215	1196	1202	1255	1252	1228	1210	1230
3253	1452	1401	1371	1423	1238	1209	1240	1255	1264	1217	1256	1232	1232	1220	1245	1209	1247	1222	1232	1217	1206	1213	1190	1200	1197	1203	1203	1207	1210	1218	1217	1214	1185	1188	1184	1185	1242	1224	1237	1235	1197	1197	1174	1180	1235	1238	1208	1196	1216
3270	1396	1347	1319	1393	1184	1207	1224	1237	1208	1215	1230	1198	1198	1190	1217	1181	1215	1222	1176	1185	1174	1181	1150	1140	1137	1165	1149	1179	1182	1164	1189	1186	1155	1158	1158	1153	1214	1196	1209	1207	1183	1183	1144	1150	1209	1206	1180	1164	1184
160	1538	1505	1477	1553	1346	1339	1370	1385	1348	1349	1386	1328	1328	1324	1375	1339	1347	1340	1322	1321	1308	1293	1284	1248	1267	1301	1285	1315	1318	1298	1323	1320	1297	1296	1286	1289	1374	1316	1329	1345	1305	1305	1278	1286	1341	1310	1318	1282	1316
167	1466	1433	1405	1477	1270	1289	1308	1321	1284	1297	1310	1278	1278	1256	1305	1265	1281	1308	1250	1243	1232	1221	1208	1180	1195	1223	1215	1241	1244	1224	1247	1244	1223	1222	1216	1219	1302	1244	1259	1269	1247	1247	1202	1210	1267	1246	1242	1214	1242
163	1433	1372	1348	1420	1211	1236	1253	1266	1223	1244	1257	1225	1225	1211	1246	1206	1234	1245	1197	1210	1201	1204	1179	1159	1160	1192	1180	1204	1207	1189	1214	1211	1184	1185	1185	1180	1241	1225	1236	1234	1212	1212	1171	1177	1234	1223	1207	1181	1211
3913	1472	1437	1423	1489	1276	1303	1322	1335	1292	1309	1324	1294	1294	1260	1313	1277	1293	1304	1268	1261	1246	1231	1230	1196	1215	1243	1225	1251	1254	1236	1261	1258	1233	1236	1230	1231	1310	1252	1267	1279	1257	1257	1218	1226	1279	1246	1254	1222	1260
1827	1394	1337	1311	1383	1174	1197	1220	1233	1194	1203	1218	1192	1192	1182	1207	1169	1203	1214	1164	1177	1166	1173	1144	1132	1129	1159	1141	1167	1170	1152	1177	1174	1145	1148	1148	1147	1202	1186	1199	1195	1173	1173	1134	1140	1197	1198	1168	1158	1172
136	1416	1363	1343	1409	1198	1209	1244	1255	1220	1215	1244	1204	1204	1206	1231	1195	1227	1226	1186	1201	1192	1199	1170	1158	1155	1185	1167	1193	1196	1176	1203	1200	1169	1172	1168	1173	1230	1214	1227	1219	1205	1205	1160	1166	1223	1224	1192	1182	1196
144	1433	1400	1382	1454	1241	1266	1281	1294	1263	1272	1289	1255	1255	1245	1274	1238	1272	1279	1229	1216	1207	1214	1183	1173	1170	1196	1186	1214	1217	1199	1224	1221	1194	1195	1189	1186	1271	1233	1248	1240	1218	1218	1179	1187	1242	1237	1217	1193	1217
2440	1529	1498	1470	1546	1339	1334	1361	1376	1343	1344	1379	1323	1323	1321	1374	1334	1344	1337	1319	1314	1301	1286	1279	1241	1260	1294	1280	1310	1313	1293	1318	1315	1294	1291	1281	1290	1371	1309	1324	1338	1300	1300	1273	1281	1336	1303	1313	1273	1311
1927	1511	1482	1456	1530	1319	1318	1347	1362	1331	1328	1363	1305	1305	1309	1358	1318	1336	1321	1305	1300	1287	1276	1263	1233	1248	1276	1264	1294	1297	1279	1304	1301	1278	1277	1267	1274	1353	1297	1312	1324	1286	1286	1259	1267	1320	1291	1297	1263	1297
432	1427	1394	1374	1444	1235	1260	1277	1290	1249	1268	1281	1249	1249	1243	1272	1232	1266	1267	1223	1212	1203	1208	1179	1167	1166	1192	1180	1208	1211	1193	1218	1215	1192	1189	1183	1188	1267	1229	1242	1236	1214	1214	1173	1181	1236	1225	1211	1179	1213
457	1444	1411	1387	1457	1250	1271	1288	1301	1266	1279	1290	1260	1260	1232	1281	1245	1259	1286	1230	1225	1214	1203	1188	1162	1177	1203	1193	1221	1224	1206	1229	1226	1201	1202	1196	1193	1278	1224	1239	1249	1227	1227	1184	1192	1249	1228	1222	1196	1224
292	1473	1444	1426	1494	1281	1308	1323	1336	1299	1316	1331	1295	1295	1263	1318	1282	1298	1309	1273	1266	1249	1234	1231	1199	1218	1244	1226	1258	1261	1243	1268	1265	1236	1239	1233	1230	1315	1255	1270	1286	1262	1262	1221	1229	1286	1249	1261	1225	1267
343	1456	1399	1373	1449	1238	1235	1266	1281	1266	1243	1282	1232	1232	1248	1271	1235	1275	1248	1234	1243	1232	1239	1216	1200	1197	1229	1207	1233	1236	1218	1243	1240	1211	1216	1212	1213	1270	1254	1265	1261	1223	1223	1202	1208	1261	1264	1234	1222	1242
2190	1496	1475	1445	1519	1308	1309	1338	1351	1316	1317	1354	1300	1300	1296	1345	1313	1317	1308	1294	1285	1280	1265	1258	1220	1239	1273	1253	1285	1288	1270	1295	1292	1267	1266	1256	1271	1346	1288	1303	1317	1275	1275	1250	1258	1319	1278	1286	1256	1288
142	1472	1453	1421	1501	1296	1287	1318	1333	1302	1295	1336	1288	1288	1294	1321	1287	1319	1294	1278	1267	1260	1265	1242	1230	1229	1265	1233	1267	1270	1250	1275	1272	1243	1244	1234	1245	1324	1280	1295	1289	1251	1251	1228	1236	1293	1282	1270	1238	1266
159	1460	1437	1407	1487	1268	1271	1292	1307	1296	1283	1320	1272	1272	1284	1305	1275	1303	1284	1262	1241	1248	1253	1226	1212	1211	1245	1203	1239	1242	1222	1247	1244	1217	1216	1206	1217	1308	1254	1267	1273	1225	1225	1200	1208	1265	1278	1240	1218	1252
145	1518	1499	1467	1543	1336	1329	1360	1375	1340	1339	1376	1326	1326	1318	1365	1333	1343	1330	1316	1311	1302	1287	1280	1254	1273	1305	1273	1309	1312	1292	1317	1314	1285	1288	1278	1285	1366	1302	1317	1335	1295	1295	1270	1278	1335	1304	1310	1276	1308
147	1488	1465	1437	1515	1306	1299	1332	1347	1316	1313	1348	1298	1298	1306	1333	1301	1329	1302	1288	1283	1276	1279	1254	1246	1247	1279	1241	1279	1282	1260	1285	1282	1259	1254	1244	1257	1334	1292	1307	1307	1267	1267	1238	1246	1303	1298	1278	1246	1282
316	1468	1439	1423	1487	1272	1307	1322	1333	1286	1311	1326	1290	1290	1258	1313	1283	1291	1304	1264	1257	1246	1231	1222	1188	1207	1233	1221	1253	1256	1238	1261	1258	1227	1236	1230	1225	1314	1256	1271	1283	1255	1255	1216	1224	1289	1244	1254	1222	1260
420	1469	1440	1424	1488	1273	1308	1323	1334	1287	1312	1327	1291	1291	1259	1314	1284	1292	1305	1265	1258	1247	1232	1223	1189	1208	1234	1222	1254	1257	1239	1262	1259	1228	1237	1231	1226	1315	1257	1272	1284	1256	1256	1217	1225	1290	1245	1255	1223	1261
313	1394	1349	1341	1393	1182	1187	1220	1233	1198	1191	1232	1182	1182	1192	1217	1189	1219	1188	1182	1189	1182	1187	1162	1150	1149	1179	1153	1183	1186	1168	1187	1184	1155	1162	1158	1161	1220	1200	1215	1211	1167	1167	1146	1152	1221	1202	1182	1162	1188
3858	1407	1354	1348	1400	1187	1194	1225	1238	1205	1198	1239	1189	1189	1205	1228	1196	1226	1199	1187	1190	1189	1194	1167	1149	1148	1178	1160	1190	1193	1175	1194	1191	1166	1169	1165	1172	1229	1209	1222	1218	1174	1174	1153	1159	1228	1211	1189	1171	1195
1746	1404	1351	1347	1399	1186	1193	1226	1239	1202	1197	1238	1188	1188	1198	1223	1197	1223	1196	1184	1191	1188	1193	1166	1148	1147	1177	1159	1189	1192	1174	1193	1190	1161	1168	1162	1165	1226	1208	1221	1217	1173	1173	1152	1158	1227	1208	1188	1170	1194
287	1401	1348	1344	1396	1183	1190	1221	1234	1199	1194	1235	1185	1185	1195	1220	1194	1222	1191	1181	1188	1185	1190	1165	1145	1144	1174	1156	1188	1191	1171	1190	1187	1158	1165	1159	1162	1223	1205	1218	1214	1170	1170	1149	1155	1224	1205	1185	1163	1191
24	1593	1558	1550	1606	1393	1402	1431	1444	1411	1404	1445	1395	1395	1405	1432	1406	1428	1403	1385	1382	1383	1384	1357	1335	1338	1366	1350	1382	1385	1367	1384	1381	1354	1363	1355	1358	1435	1393	1412	1408	1364	1364	1341	1349	1418	1403	1383	1357	1385
21	1582	1559	1543	1603	1398	1403	1438	1451	1414	1409	1448	1398	1398	1406	1435	1409	1429	1400	1386	1385	1382	1381	1356	1334	1339	1369	1347	1379	1382	1366	1385	1382	1355	1364	1354	1359	1438	1394	1411	1407	1363	1363	1342	1350	1417	1394	1382	1354	1380
1929	1512	1485	1455	1529	1322	1317	1344	1359	1330	1329	1364	1308	1308	1308	1357	1323	1335	1320	1306	1301	1288	1273	1266	1230	1249	1279	1261	1297	1300	1280	1305	1302	1279	1276	1266	1275	1356	1292	1307	1325	1285	1285	1258	1266	1323	1290	1298	1260	1298
3785	1483	1456	1424	1500	1293	1286	1313	1328	1311	1298	1333	1279	1279	1281	1326	1292	1308	1299	1277	1270	1257	1246	1235	1203	1218	1248	1232	1266	1269	1251	1274	1271	1248	1245	1235	1244	1325	1265	1280	1294	1254	1254	1227	1235	1292	1271	1267	1239	1267
297	1511	1484	1454	1528	1321	1316	1343	1358	1329	1328	1363	1307	1307	1307	1356	1322	1334	1319	1305	1300	1287	1272	1265	1229	1248	1278	1260	1296	1299	1279	1304	1301	1278	1275	1265	1274	1355	1291	1306	1324	1284	1284	1257	1265	1322	1289	1297	1259	1297
98	1507	1484	1454	1528	1321	1316	1343	1358	1329	1328	1363	1307	1307	1307	1356	1322	1334	1319	1305	1300	1287	1272	1265	1229	1248	1278	1260	1296	1299	1279	1304	1301	1278	1275	1265	1274	1355	1291	1306	1324	1284	1284	1257	1265	1322	1289	1297	1259	1297
1789	1512	1485	1455	1529	1322	1317	1344	1359	1330	1329	1364	1308	1308	1308	1357	1323	1335	1320	1306	1301	1288	1273	1266	1230	1249	1279	1261	1297	1300	1280	1305	1302	1279	1276	1266	1275	1356	1292	1307	1325	1285	1285	1258	1266	1323	1290	1298	1260	1298
1783	1513	1486	1456	1530	1323	1318	1345	1360	1331	1330	1365	1309	1309	1309	1358	1324	1336	1321	1307	1302	1289	1274	1267	1231	1250	1280	1262	1298	1301	1281	1306	1303	1280	1277	1267	1276	1357	1293	1308	1326	1286	1286	1259	1267	1324	1291	1299	1261	1299
2392	1513	1486	1456	1530	1323	1318	1345	1360	1331	1330	1365	1309	1309	1309	1358	1324	1336	1321	1307	1302	1289	1274	1267	1231	1250	1280	1262	1298	1301	1281	1306	1303	1280	1277	1267	1276	1357	1293	1308	1326	1286	1286	1259	1267	1324	1291	1299	1261	1299
2311	1515	1488	1458	1532	1325	1320	1347	1362	1333	1332	1367	1311	1311	1311	1360	1326	1338	1323	1309	1304	1291	1276	1269	1233	1252	1282	1264	1300	1303	1283	1308	1305	1282	1279	1269	1278	1359	1295	1310	1328	1288	1288	1261	1269	1326	1293	1301	1263	1301
2393	1513	1486	1456	1530	1323	1318	1345	1360	1331	1330	1365	1309	1309	1309	1358	1324	1336	1321	1307	1302	1289	1274	1267	1231	1250	1280	1262	1298	1301	1281	1306	1303	1280	1277	1267	1276	1357	1293	1308	1326	1286	1286	1259	1267	1324	1291	1299	1261	1299
2394	1513	1486	1456	1530	1323	1318	1345	1360	1331	1330	1365	1309	1309	1309	1358	1324	1336	1321	1307	1302	1289	1274	1267	1231	1250	1280	1262	1298	1301	1281	1306	1303	1280	1277	1267	1276	1357	1293	1308	1326	1286	1286	1259	1267	1324	1291	1299	1261	1299
2391	1514	1487	1457	1531	1324	1319	1346	1361	1332	1331	1366	1310	1310	1310	1359	1325	1337	1322	1308	1303	1290	1275	1268	1232	1251	1281	1263	1299	1302	1282	1307	1304	1281	1278	1268	1277	1358	1294	1309	1327	1287	1287	1260	1268	1325	1292	1300	1262	1300
2389	1513	1486	1456	1530	1323	1318	1345	1360	1331	1330	1365	1309	1309	1309	1358	1324	1336	1321	1307	1302	1289	1274	1267	1231	1250	1280	1262	1298	1301	1281	1306	1303	1280	1277	1267	1276	1357	1293	1308	1326	1286	1286	1259	1267	1324	1291	1299	1261	1299
307	1515	1488	1458	1532	1327	1320	1347	1362	1333	1330	1367	1311	1311	1305	1356	1326	1336	1321	1307	1304	1289	1274	1267	1233	1252	1282	1264	1300	1303	1283	1308	1305	1276	1279	1269	1270	1357	1293	1308	1326	1286	1286	1261	1269	1326	1291	1301	1263	1299
3766	1463	1432	1408	1476	1271	1292	1307	1320	1277	1300	1313	1281	1281	1249	1302	1270	1280	1295	1251	1248	1233	1218	1211	1179	1198	1226	1210	1244	1247	1227	1252	1249	1220	1223	1217	1214	1301	1239	1254	1270	1246	1246	1205	1213	1272	1235	1245	1207	1245
2418	1506	1475	1449	1527	1312	1309	1340	1355	1336	1323	1358	1300	1300	1298	1351	1307	1327	1320	1302	1295	1278	1267	1258	1226	1241	1273	1253	1285	1288	1270	1293	1290	1273	1264	1254	1271	1346	1288	1305	1317	1277	1277	1246	1254	1309	1290	1288	1258	1290
1748	1503	1468	1446	1522	1305	1304	1335	1350	1329	1318	1353	1295	1295	1297	1346	1304	1324	1315	1295	1288	1277	1266	1253	1223	1238	1266	1248	1282	1285	1267	1290	1287	1270	1261	1251	1264	1341	1285	1300	1314	1274	1274	1243	1251	1306	1289	1283	1257	1287
3793	1534	1499	1479	1553	1336	1337	1368	1383	1350	1351	1386	1326	1326	1326	1379	1337	1353	1338	1326	1321	1310	1295	1286	1252	1271	1299	1279	1315	1318	1298	1323	1320	1303	1294	1284	1297	1374	1314	1329	1347	1307	1307	1276	1284	1339	1310	1316	1280	1320
169	1516	1481	1457	1535	1318	1317	1348	1363	1340	1331	1366	1308	1308	1308	1359	1315	1335	1328	1306	1299	1288	1277	1266	1234	1249	1279	1261	1293	1296	1278	1301	1298	1281	1272	1262	1277	1354	1298	1313	1325	1285	1285	1254	1262	1317	1300	1296	1268	1298
2150	1489	1458	1438	1508	1291	1296	1325	1338	1307	1306	1341	1281	1281	1279	1334	1298	1310	1295	1283	1278	1265	1250	1243	1205	1224	1254	1236	1270	1273	1253	1278	1275	1258	1251	1241	1252	1333	1275	1290	1304	1262	1262	1233	1241	1302	1263	1271	1235	1279
3827	1529	1494	1476	1548	1331	1332	1363	1378	1345	1346	1381	1321	1321	1321	1374	1332	1348	1333	1321	1316	1305	1290	1281	1247	1266	1294	1274	1310	1313	1293	1318	1315	1298	1289	1279	1292	1369	1309	1324	1342	1302	1302	1271	1279	1334	1305	1311	1275	1315
3777	1505	1470	1450	1524	1307	1306	1337	1352	1331	1320	1355	1297	1297	1299	1348	1306	1326	1317	1297	1290	1279	1268	1255	1225	1240	1268	1250	1284	1287	1269	1292	1289	1272	1263	1253	1266	1343	1287	1302	1316	1276	1276	1245	1253	1308	1291	1285	1259	1289
137	1402	1351	1327	1397	1180	1211	1230	1241	1210	1211	1230	1200	1200	1174	1219	1185	1201	1224	1176	1189	1174	1163	1160	1126	1141	1171	1151	1175	1178	1160	1185	1182	1151	1158	1158	1155	1216	1186	1197	1205	1181	1181	1142	1148	1213	1188	1174	1166	1186
143	1390	1339	1331	1385	1168	1175	1200	1213	1188	1177	1218	1158	1158	1174	1205	1175	1201	1192	1158	1167	1158	1165	1138	1122	1119	1147	1141	1163	1166	1148	1171	1168	1143	1146	1142	1137	1206	1190	1203	1193	1151	1151	1132	1138	1205	1190	1166	1148	1168
139	1411	1372	1350	1420	1203	1236	1261	1272	1225	1242	1251	1225	1225	1193	1244	1204	1216	1245	1189	1192	1185	1174	1165	1131	1146	1176	1160	1182	1185	1167	1186	1183	1164	1163	1163	1168	1237	1195	1210	1216	1192	1192	1149	1155	1218	1199	1185	1169	1193
135	1434	1385	1369	1427	1212	1217	1246	1259	1230	1219	1260	1208	1208	1218	1247	1215	1241	1228	1200	1211	1204	1207	1186	1162	1163	1197	1181	1205	1208	1188	1215	1212	1181	1186	1182	1185	1250	1232	1243	1233	1195	1195	1172	1178	1243	1230	1206	1192	1210
140	1454	1431	1401	1471	1256	1261	1296	1309	1282	1267	1304	1254	1254	1252	1295	1265	1275	1270	1252	1243	1232	1221	1214	1180	1195	1225	1205	1235	1238	1222	1243	1240	1209	1216	1212	1217	1294	1238	1253	1265	1223	1223	1200	1208	1271	1248	1238	1224	1238
141	1449	1402	1372	1446	1231	1236	1265	1278	1247	1242	1283	1229	1229	1245	1272	1240	1270	1245	1227	1232	1225	1230	1207	1185	1184	1218	1198	1228	1231	1211	1238	1235	1206	1207	1203	1210	1275	1251	1262	1256	1214	1214	1193	1199	1264	1247	1229	1207	1233
328	1444	1415	1395	1465	1252	1277	1292	1305	1274	1285	1300	1266	1266	1236	1287	1251	1267	1288	1240	1229	1218	1207	1194	1172	1187	1213	1197	1227	1230	1214	1237	1234	1205	1208	1202	1199	1284	1226	1243	1255	1231	1231	1190	1198	1255	1230	1230	1204	1230
1825	1477	1450	1430	1498	1285	1314	1329	1342	1299	1322	1335	1301	1301	1275	1328	1288	1304	1319	1275	1266	1255	1240	1231	1205	1224	1250	1234	1266	1269	1249	1274	1271	1244	1247	1241	1242	1325	1261	1276	1294	1268	1268	1227	1235	1292	1255	1267	1231	1267
294	1451	1424	1402	1472	1259	1286	1301	1314	1283	1294	1307	1275	1275	1251	1300	1260	1280	1301	1249	1238	1227	1216	1203	1181	1196	1222	1208	1238	1241	1223	1246	1243	1216	1219	1213	1214	1297	1237	1252	1266	1240	1240	1199	1207	1264	1239	1239	1213	1239
3910	1476	1449	1425	1495	1284	1311	1328	1341	1298	1319	1332	1298	1298	1266	1321	1285	1299	1314	1274	1267	1252	1237	1228	1204	1223	1249	1231	1263	1266	1246	1271	1268	1237	1244	1238	1235	1320	1256	1273	1291	1265	1265	1224	1232	1289	1252	1264	1228	1264
431	1475	1452	1424	1504	1285	1288	1317	1332	1313	1300	1335	1277	1277	1287	1322	1286	1318	1297	1275	1270	1259	1262	1235	1225	1226	1254	1232	1266	1269	1249	1272	1269	1244	1245	1235	1240	1321	1281	1296	1298	1256	1256	1225	1233	1288	1285	1265	1239	1269
310	1444	1423	1395	1467	1256	1281	1298	1311	1278	1289	1302	1270	1270	1240	1291	1255	1273	1294	1246	1237	1222	1211	1198	1178	1193	1219	1203	1233	1236	1218	1241	1238	1207	1214	1208	1205	1290	1230	1247	1261	1235	1235	1194	1202	1259	1234	1234	1208	1234
426	1443	1422	1394	1466	1255	1280	1297	1310	1277	1288	1301	1269	1269	1239	1290	1254	1272	1293	1245	1236	1221	1210	1197	1177	1192	1218	1202	1232	1235	1217	1240	1237	1206	1213	1207	1204	1289	1229	1246	1260	1234	1234	1193	1201	1258	1233	1233	1207	1233
425	1548	1523	1495	1571	1358	1357	1386	1401	1370	1367	1406	1346	1346	1340	1393	1359	1373	1358	1344	1339	1326	1311	1302	1270	1289	1317	1303	1337	1340	1320	1345	1342	1313	1318	1308	1307	1394	1330	1345	1365	1323	1323	1298	1306	1361	1326	1338	1302	1336
1922	1493	1464	1442	1510	1299	1326	1343	1356	1311	1334	1347	1313	1313	1281	1336	1300	1314	1327	1285	1280	1267	1252	1243	1213	1232	1258	1246	1276	1279	1261	1284	1281	1252	1259	1253	1246	1335	1273	1288	1304	1278	1278	1239	1247	1304	1267	1279	1241	1279
3790	1536	1513	1483	1557	1346	1345	1376	1391	1358	1357	1392	1334	1334	1328	1381	1347	1361	1344	1332	1329	1316	1301	1292	1260	1279	1307	1291	1323	1326	1308	1331	1328	1301	1306	1296	1295	1382	1320	1335	1353	1311	1311	1286	1294	1349	1316	1326	1288	1326
2173	1490	1461	1441	1511	1296	1325	1340	1353	1312	1333	1348	1312	1312	1288	1341	1301	1317	1328	1288	1277	1268	1253	1244	1210	1229	1255	1245	1275	1278	1260	1283	1280	1255	1258	1252	1251	1338	1272	1287	1303	1277	1277	1238	1246	1303	1268	1278	1240	1280
1703	1525	1494	1472	1544	1331	1332	1359	1374	1343	1340	1377	1319	1319	1319	1372	1334	1348	1333	1321	1312	1299	1284	1275	1241	1260	1288	1280	1308	1311	1293	1318	1315	1290	1293	1283	1288	1369	1307	1322	1336	1296	1296	1275	1283	1334	1299	1311	1275	1309
4327	1515	1492	1464	1540	1329	1324	1353	1366	1355	1334	1371	1315	1315	1311	1360	1326	1348	1333	1319	1314	1293	1282	1277	1247	1262	1290	1268	1302	1305	1289	1312	1309	1278	1283	1273	1274	1359	1301	1316	1330	1290	1290	1265	1273	1328	1305	1305	1279	1309
4269	1513	1490	1462	1538	1329	1324	1353	1366	1355	1334	1371	1315	1315	1311	1360	1326	1348	1333	1319	1314	1293	1282	1277	1247	1262	1290	1268	1302	1305	1289	1312	1309	1278	1283	1273	1274	1359	1301	1316	1330	1290	1290	1265	1273	1328	1305	1305	1279	1309
3874	1501	1470	1444	1520	1305	1304	1333	1346	1337	1318	1351	1295	1295	1297	1348	1304	1330	1317	1303	1298	1277	1266	1263	1227	1242	1274	1246	1282	1285	1267	1290	1287	1268	1261	1257	1264	1341	1285	1300	1316	1276	1276	1245	1253	1306	1291	1285	1261	1295
1974	1543	1516	1494	1568	1355	1354	1385	1398	1367	1368	1401	1343	1343	1341	1396	1354	1372	1355	1343	1342	1325	1310	1305	1269	1288	1318	1294	1332	1335	1315	1340	1337	1318	1311	1301	1314	1391	1331	1346	1364	1324	1324	1293	1301	1356	1325	1333	1295	1337
1877	1525	1502	1474	1548	1337	1336	1365	1378	1349	1348	1383	1325	1325	1319	1372	1340	1350	1335	1323	1318	1307	1292	1283	1249	1268	1296	1278	1314	1317	1299	1324	1321	1292	1295	1285	1288	1371	1311	1326	1344	1304	1304	1277	1285	1340	1307	1317	1281	1317
3853	1414	1367	1333	1385	1194	1173	1202	1215	1218	1181	1220	1186	1186	1184	1209	1177	1211	1186	1190	1177	1168	1175	1146	1152	1149	1155	1161	1169	1172	1178	1179	1176	1151	1150	1146	1149	1210	1192	1205	1201	1157	1157	1136	1142	1205	1198	1170	1156	1178
282	1468	1445	1415	1489	1274	1277	1306	1319	1298	1285	1322	1264	1264	1266	1313	1281	1297	1286	1266	1259	1246	1235	1224	1190	1205	1233	1221	1251	1254	1238	1261	1258	1233	1234	1224	1231	1314	1258	1273	1283	1239	1239	1216	1224	1285	1256	1254	1230	1258
165	1516	1489	1459	1535	1326	1321	1346	1361	1344	1331	1368	1314	1314	1310	1357	1325	1339	1330	1312	1301	1290	1279	1266	1242	1257	1287	1267	1299	1302	1286	1307	1304	1277	1280	1270	1269	1358	1296	1313	1325	1283	1283	1262	1270	1327	1304	1302	1272	1300
455	1520	1501	1471	1545	1332	1333	1364	1379	1346	1345	1380	1324	1324	1318	1369	1335	1349	1332	1320	1315	1306	1291	1282	1254	1273	1301	1279	1311	1314	1296	1319	1316	1289	1294	1284	1285	1370	1308	1323	1341	1299	1299	1274	1282	1337	1306	1314	1278	1314
17	1516	1499	1467	1541	1328	1329	1358	1373	1354	1341	1376	1320	1320	1316	1365	1331	1347	1336	1316	1309	1300	1289	1274	1252	1267	1295	1275	1307	1310	1294	1313	1310	1283	1290	1280	1279	1366	1308	1325	1337	1295	1295	1268	1276	1333	1312	1308	1282	1308
138	1457	1434	1408	1478	1265	1292	1309	1322	1277	1302	1315	1279	1279	1247	1306	1266	1280	1295	1253	1248	1235	1220	1215	1185	1204	1234	1214	1242	1245	1227	1250	1247	1220	1225	1221	1216	1303	1243	1258	1274	1246	1246	1207	1215	1270	1235	1249	1209	1247
3894	1526	1507	1477	1551	1338	1339	1368	1383	1352	1351	1386	1328	1328	1322	1375	1341	1355	1338	1326	1321	1310	1295	1286	1258	1277	1305	1285	1317	1320	1302	1325	1322	1295	1300	1290	1289	1376	1314	1329	1347	1305	1305	1280	1288	1343	1310	1320	1282	1320
354	1469	1446	1422	1490	1277	1306	1321	1334	1291	1316	1327	1293	1293	1259	1316	1280	1294	1307	1265	1260	1247	1232	1225	1197	1216	1244	1226	1256	1259	1241	1264	1261	1234	1239	1233	1228	1315	1255	1270	1286	1260	1260	1219	1227	1284	1247	1259	1219	1261
2007	1455	1422	1402	1472	1255	1284	1301	1314	1283	1296	1305	1273	1273	1241	1294	1256	1274	1293	1243	1240	1227	1216	1205	1181	1196	1224	1204	1234	1237	1219	1240	1237	1214	1215	1209	1208	1291	1239	1254	1266	1240	1240	1195	1203	1260	1239	1235	1205	1241
1847	1491	1462	1436	1512	1291	1294	1323	1338	1321	1308	1341	1285	1285	1279	1330	1294	1312	1301	1281	1278	1263	1252	1243	1217	1232	1262	1238	1272	1275	1255	1278	1275	1250	1251	1241	1246	1329	1275	1290	1302	1262	1262	1231	1239	1294	1277	1271	1243	1275
44	1480	1459	1431	1501	1292	1317	1332	1345	1302	1327	1338	1306	1306	1274	1327	1293	1305	1320	1276	1271	1260	1245	1236	1210	1229	1257	1237	1269	1272	1252	1275	1272	1247	1250	1244	1239	1328	1266	1281	1297	1271	1271	1230	1238	1297	1262	1270	1230	1272
3184	1570	1553	1517	1593	1368	1373	1408	1419	1388	1387	1424	1364	1364	1366	1417	1375	1391	1378	1364	1355	1348	1333	1324	1292	1311	1343	1317	1351	1354	1332	1359	1356	1329	1332	1326	1329	1418	1350	1365	1385	1341	1341	1314	1322	1375	1348	1352	1324	1354
15	1566	1549	1519	1593	1378	1377	1408	1421	1388	1389	1424	1368	1368	1370	1417	1381	1393	1380	1362	1357	1348	1333	1322	1292	1311	1341	1319	1357	1360	1338	1361	1358	1335	1338	1326	1333	1418	1350	1367	1385	1343	1343	1314	1322	1381	1350	1354	1320	1354
146	1429	1406	1378	1448	1235	1260	1279	1290	1253	1270	1287	1253	1253	1245	1278	1238	1272	1273	1229	1218	1211	1214	1187	1175	1176	1204	1184	1216	1219	1197	1224	1221	1192	1193	1193	1190	1279	1229	1244	1242	1216	1216	1179	1187	1242	1231	1217	1191	1215
151	1489	1466	1434	1510	1297	1298	1327	1340	1317	1308	1349	1291	1291	1309	1338	1300	1334	1309	1293	1280	1273	1276	1249	1235	1236	1266	1244	1278	1281	1259	1286	1283	1254	1255	1251	1252	1341	1291	1304	1304	1264	1264	1241	1249	1302	1293	1279	1253	1277
148	1409	1380	1362	1428	1211	1242	1259	1270	1231	1250	1263	1227	1227	1211	1250	1216	1244	1243	1201	1198	1185	1186	1163	1151	1154	1182	1162	1190	1193	1175	1196	1193	1170	1173	1167	1164	1253	1217	1230	1224	1194	1194	1153	1161	1226	1201	1191	1155	1199
154	1425	1408	1374	1448	1233	1236	1265	1278	1249	1244	1283	1227	1227	1245	1274	1240	1274	1241	1229	1214	1205	1208	1183	1169	1170	1200	1178	1210	1213	1193	1218	1215	1188	1191	1187	1184	1281	1231	1244	1238	1196	1196	1175	1183	1244	1225	1213	1185	1215
3866	1442	1421	1393	1465	1248	1249	1284	1297	1276	1261	1296	1240	1240	1244	1291	1251	1273	1262	1248	1239	1220	1209	1202	1168	1183	1215	1191	1229	1232	1210	1235	1232	1213	1208	1200	1213	1292	1236	1253	1257	1219	1219	1192	1200	1259	1234	1228	1208	1236
170	1462	1433	1403	1477	1260	1265	1292	1305	1284	1269	1308	1250	1250	1252	1303	1265	1285	1278	1256	1247	1232	1221	1210	1180	1195	1225	1209	1237	1240	1222	1247	1244	1217	1220	1216	1213	1304	1246	1261	1267	1227	1227	1204	1212	1271	1244	1240	1222	1242
171	1444	1425	1403	1467	1256	1283	1300	1311	1266	1287	1304	1268	1268	1244	1295	1259	1267	1286	1242	1235	1228	1213	1200	1170	1189	1215	1201	1233	1236	1216	1241	1238	1215	1214	1208	1211	1298	1238	1253	1263	1233	1233	1196	1204	1271	1226	1234	1200	1236
3171	1499	1474	1444	1514	1297	1302	1329	1342	1311	1310	1347	1289	1289	1293	1340	1308	1312	1307	1289	1280	1275	1260	1247	1219	1238	1268	1240	1276	1279	1257	1284	1281	1256	1255	1251	1254	1343	1279	1294	1306	1264	1264	1239	1247	1312	1277	1277	1249	1281
134	1492	1477	1449	1519	1308	1309	1338	1351	1318	1315	1354	1296	1296	1296	1345	1311	1319	1310	1292	1285	1278	1263	1250	1218	1237	1265	1249	1283	1286	1266	1291	1288	1265	1264	1254	1261	1350	1286	1301	1313	1269	1269	1246	1254	1319	1276	1284	1250	1286
152	1459	1434	1410	1480	1261	1268	1301	1314	1279	1272	1311	1251	1251	1253	1306	1262	1282	1271	1257	1254	1239	1224	1215	1179	1198	1228	1214	1238	1241	1223	1244	1241	1226	1225	1221	1224	1305	1249	1262	1274	1232	1232	1207	1215	1272	1237	1241	1211	1249
3199	1465	1426	1392	1464	1243	1252	1281	1294	1257	1254	1297	1239	1239	1235	1284	1248	1264	1253	1239	1248	1239	1224	1217	1177	1196	1228	1214	1242	1245	1221	1248	1245	1218	1225	1221	1216	1291	1247	1262	1274	1232	1232	1207	1213	1274	1241	1239	1217	1247
3615	1449	1434	1400	1470	1251	1258	1289	1302	1281	1264	1305	1247	1247	1243	1294	1260	1278	1267	1251	1242	1223	1212	1207	1171	1186	1216	1200	1232	1235	1217	1236	1233	1204	1215	1211	1204	1297	1237	1252	1262	1220	1220	1195	1203	1268	1237	1233	1217	1235
157	1433	1388	1360	1428	1219	1240	1255	1266	1235	1244	1263	1227	1227	1203	1258	1212	1232	1257	1207	1218	1207	1196	1183	1157	1172	1204	1184	1212	1215	1199	1222	1219	1192	1195	1195	1186	1253	1217	1230	1244	1218	1218	1181	1187	1244	1217	1213	1195	1221
1925	1627	1604	1574	1656	1433	1436	1455	1468	1443	1454	1485	1435	1435	1425	1474	1438	1450	1441	1427	1408	1409	1394	1383	1343	1362	1400	1378	1402	1407	1385	1406	1403	1384	1383	1371	1382	1477	1395	1412	1436	1384	1384	1371	1379	1428	1409	1405	1369	1411
9	1677	1652	1632	1710	1485	1494	1513	1528	1501	1510	1543	1495	1495	1481	1532	1494	1506	1495	1483	1468	1467	1452	1441	1399	1418	1460	1434	1462	1467	1445	1464	1461	1440	1443	1431	1444	1533	1457	1474	1494	1444	1444	1427	1435	1488	1463	1465	1431	1469
8	1629	1606	1584	1664	1449	1452	1477	1490	1461	1464	1501	1453	1453	1459	1486	1448	1486	1451	1437	1430	1419	1426	1397	1379	1376	1414	1402	1422	1427	1409	1426	1423	1402	1405	1393	1408	1487	1441	1458	1448	1406	1406	1391	1399	1448	1441	1425	1397	1421
3757	1631	1614	1588	1664	1455	1448	1475	1488	1457	1464	1497	1445	1445	1435	1486	1450	1466	1449	1437	1432	1417	1402	1391	1357	1376	1414	1398	1426	1431	1411	1432	1429	1404	1407	1395	1406	1489	1419	1434	1450	1410	1410	1393	1401	1452	1415	1425	1395	1421
3755	1629	1612	1586	1666	1443	1448	1475	1488	1455	1456	1497	1441	1441	1427	1486	1450	1456	1441	1429	1420	1409	1394	1391	1355	1374	1406	1390	1422	1425	1407	1426	1423	1398	1405	1393	1398	1481	1417	1432	1450	1404	1404	1383	1391	1448	1413	1425	1385	1419
3860	1640	1623	1595	1673	1450	1457	1478	1491	1468	1473	1506	1454	1454	1442	1495	1457	1471	1458	1446	1431	1428	1413	1400	1362	1381	1421	1393	1419	1424	1404	1425	1422	1399	1402	1390	1403	1498	1418	1433	1455	1403	1403	1386	1394	1445	1424	1422	1388	1430
3744	1630	1613	1585	1663	1440	1447	1468	1481	1458	1463	1496	1444	1444	1432	1485	1447	1461	1448	1436	1421	1418	1403	1390	1352	1371	1411	1383	1409	1414	1394	1415	1412	1389	1392	1380	1393	1488	1408	1423	1445	1393	1393	1376	1384	1435	1414	1412	1378	1420
3758	1621	1606	1580	1660	1439	1440	1467	1480	1447	1456	1489	1435	1435	1417	1476	1438	1452	1437	1427	1420	1405	1390	1385	1351	1370	1404	1388	1418	1423	1403	1420	1417	1396	1397	1385	1398	1477	1411	1426	1442	1400	1400	1381	1389	1442	1403	1419	1381	1411
3830	1660	1639	1615	1691	1460	1473	1494	1507	1482	1483	1522	1464	1464	1450	1511	1471	1479	1468	1456	1441	1440	1425	1418	1380	1399	1433	1407	1441	1444	1424	1445	1442	1419	1422	1410	1415	1508	1438	1453	1473	1423	1423	1400	1408	1465	1442	1442	1402	1448
3759	1636	1611	1585	1667	1438	1443	1462	1475	1454	1461	1494	1442	1442	1436	1485	1443	1461	1452	1436	1417	1414	1399	1386	1346	1365	1407	1383	1405	1410	1390	1413	1410	1395	1388	1376	1397	1488	1404	1419	1441	1389	1389	1376	1384	1431	1410	1410	1376	1416
3778	1623	1598	1576	1658	1429	1438	1457	1470	1443	1454	1485	1435	1435	1419	1476	1434	1452	1441	1427	1412	1405	1390	1383	1347	1366	1406	1378	1400	1405	1385	1404	1401	1382	1383	1371	1384	1477	1397	1412	1436	1384	1384	1369	1377	1424	1399	1407	1369	1409
3750	1631	1610	1580	1660	1437	1442	1469	1482	1451	1450	1491	1433	1433	1417	1480	1438	1448	1437	1425	1416	1407	1392	1385	1357	1376	1410	1386	1418	1421	1403	1424	1421	1396	1401	1389	1392	1477	1415	1430	1444	1400	1400	1379	1387	1444	1405	1421	1381	1415
3749	1614	1597	1569	1647	1428	1431	1462	1475	1438	1443	1480	1422	1422	1408	1467	1431	1437	1424	1410	1409	1394	1379	1374	1340	1359	1391	1373	1405	1408	1390	1411	1408	1385	1388	1376	1381	1464	1402	1417	1431	1389	1389	1366	1374	1431	1398	1408	1368	1402
6	1653	1634	1602	1680	1461	1460	1487	1500	1471	1474	1509	1457	1457	1451	1502	1460	1468	1461	1445	1436	1431	1416	1403	1379	1398	1438	1398	1434	1439	1415	1436	1433	1416	1413	1401	1414	1501	1431	1446	1466	1416	1416	1393	1401	1458	1433	1433	1397	1433
3763	1632	1613	1589	1665	1446	1447	1474	1487	1454	1457	1496	1440	1440	1430	1483	1451	1455	1440	1432	1425	1414	1399	1394	1360	1379	1407	1391	1427	1430	1410	1429	1426	1407	1408	1396	1399	1480	1418	1433	1451	1411	1411	1386	1394	1453	1422	1426	1386	1422
3851	1612	1597	1559	1635	1422	1419	1444	1455	1424	1431	1466	1416	1416	1406	1453	1421	1431	1420	1404	1395	1388	1373	1358	1324	1343	1387	1359	1387	1392	1370	1391	1388	1363	1370	1360	1365	1462	1388	1403	1419	1367	1367	1354	1362	1421	1386	1388	1360	1390
3743	1625	1610	1578	1658	1441	1438	1467	1480	1449	1456	1487	1437	1437	1421	1476	1436	1456	1441	1431	1426	1411	1396	1385	1351	1370	1412	1390	1418	1423	1403	1422	1419	1396	1397	1385	1402	1481	1415	1430	1444	1400	1400	1383	1391	1442	1403	1419	1387	1415
7	1653	1624	1606	1686	1455	1468	1489	1500	1475	1480	1515	1459	1459	1445	1504	1466	1476	1467	1453	1440	1437	1422	1415	1373	1392	1430	1396	1430	1433	1411	1430	1427	1410	1409	1399	1408	1507	1433	1450	1470	1416	1416	1391	1399	1460	1433	1433	1393	1447
11	1612	1579	1555	1627	1414	1439	1456	1469	1426	1447	1464	1426	1426	1394	1451	1415	1421	1438	1396	1403	1394	1379	1366	1338	1357	1385	1365	1403	1406	1388	1409	1406	1379	1382	1376	1379	1448	1400	1415	1429	1401	1401	1364	1372	1433	1390	1400	1366	1402
3131	1606	1589	1559	1635	1416	1419	1450	1463	1430	1427	1466	1412	1412	1408	1459	1423	1425	1422	1404	1395	1394	1379	1364	1334	1353	1383	1361	1397	1400	1380	1401	1398	1377	1380	1370	1377	1458	1392	1407	1427	1383	1383	1360	1368	1423	1392	1396	1364	1394
3775	1539	1516	1488	1562	1339	1344	1375	1386	1353	1350	1393	1335	1335	1329	1376	1350	1346	1343	1323	1320	1321	1306	1289	1261	1280	1308	1290	1324	1327	1307	1328	1325	1302	1307	1295	1298	1383	1325	1340	1354	1308	1308	1285	1293	1358	1321	1321	1291	1323
3130	1529	1492	1466	1536	1323	1324	1353	1366	1329	1336	1371	1319	1319	1313	1354	1330	1338	1329	1313	1328	1321	1306	1291	1255	1274	1308	1292	1320	1325	1303	1324	1321	1298	1301	1291	1304	1361	1319	1334	1348	1306	1306	1289	1295	1356	1313	1315	1297	1321
3146	1513	1476	1456	1522	1313	1338	1355	1366	1319	1350	1363	1333	1333	1303	1346	1316	1324	1345	1301	1316	1309	1294	1279	1245	1264	1296	1280	1306	1311	1291	1310	1307	1284	1287	1281	1290	1347	1305	1320	1336	1306	1306	1275	1283	1344	1301	1303	1283	1309
3730	1583	1536	1510	1586	1367	1366	1383	1398	1379	1382	1415	1367	1367	1357	1402	1368	1386	1377	1361	1366	1363	1348	1335	1297	1316	1356	1332	1354	1359	1337	1362	1359	1332	1333	1323	1340	1409	1351	1364	1388	1338	1338	1325	1331	1382	1359	1351	1329	1365
3196	1622	1581	1559	1633	1420	1419	1436	1453	1432	1433	1468	1420	1420	1408	1453	1419	1435	1428	1412	1413	1410	1395	1382	1340	1359	1401	1381	1401	1406	1386	1409	1406	1379	1380	1370	1387	1460	1398	1411	1433	1387	1387	1374	1382	1431	1404	1400	1378	1412
3722	1650	1629	1603	1679	1474	1473	1500	1513	1484	1485	1522	1468	1468	1460	1509	1477	1491	1474	1462	1457	1450	1435	1420	1396	1415	1445	1427	1457	1460	1444	1463	1460	1435	1438	1426	1431	1512	1452	1467	1479	1439	1439	1422	1430	1487	1444	1456	1426	1452
3736	1588	1567	1541	1615	1402	1399	1426	1439	1412	1413	1448	1398	1398	1390	1435	1403	1417	1402	1390	1387	1378	1363	1344	1320	1339	1375	1353	1383	1388	1370	1389	1386	1361	1364	1352	1363	1440	1378	1393	1405	1365	1365	1350	1358	1413	1370	1382	1356	1380
4335	1501	1482	1454	1528	1313	1308	1341	1354	1327	1328	1361	1313	1313	1325	1344	1316	1354	1317	1309	1308	1295	1300	1267	1261	1260	1294	1272	1306	1311	1291	1306	1303	1284	1283	1271	1286	1353	1317	1330	1324	1286	1286	1269	1277	1330	1311	1305	1281	1299
3886	1513	1474	1446	1520	1309	1304	1335	1346	1311	1316	1351	1303	1303	1297	1336	1312	1322	1305	1295	1312	1305	1290	1273	1241	1260	1296	1274	1304	1309	1289	1310	1307	1284	1287	1275	1288	1347	1307	1320	1332	1290	1290	1273	1279	1342	1299	1299	1281	1311
3165	1565	1522	1494	1568	1353	1350	1379	1394	1355	1358	1393	1339	1339	1331	1380	1350	1364	1357	1337	1354	1339	1324	1309	1275	1294	1330	1316	1346	1351	1331	1352	1349	1324	1329	1321	1326	1389	1347	1362	1370	1330	1330	1315	1323	1380	1331	1347	1319	1347
12	1626	1603	1565	1647	1432	1437	1468	1481	1444	1443	1482	1426	1426	1414	1467	1433	1447	1432	1420	1425	1418	1403	1392	1354	1373	1405	1387	1421	1424	1406	1427	1424	1399	1406	1394	1403	1472	1424	1441	1445	1405	1405	1388	1396	1455	1408	1424	1392	1426
3716	1563	1520	1496	1572	1357	1352	1381	1394	1365	1364	1401	1349	1349	1341	1386	1356	1368	1353	1345	1358	1345	1330	1317	1283	1302	1338	1320	1352	1357	1337	1360	1357	1334	1335	1323	1334	1389	1347	1362	1372	1334	1334	1321	1327	1382	1339	1351	1323	1351
3138	1560	1531	1503	1581	1374	1369	1400	1413	1380	1387	1420	1372	1372	1368	1405	1373	1389	1378	1360	1355	1352	1339	1322	1286	1303	1341	1321	1347	1352	1330	1355	1352	1325	1324	1314	1333	1414	1348	1363	1373	1331	1331	1316	1324	1375	1348	1348	1324	1350
3134	1570	1537	1511	1585	1374	1371	1402	1419	1386	1385	1420	1374	1374	1366	1407	1373	1389	1376	1364	1373	1366	1353	1334	1310	1327	1363	1333	1371	1376	1354	1375	1372	1343	1346	1336	1355	1412	1364	1379	1395	1351	1351	1332	1338	1397	1360	1368	1344	1366
3147	1563	1524	1496	1572	1365	1356	1383	1398	1369	1374	1405	1355	1355	1347	1392	1360	1374	1365	1347	1362	1353	1338	1319	1293	1312	1350	1328	1362	1367	1345	1368	1365	1340	1337	1327	1342	1401	1355	1368	1386	1344	1344	1327	1333	1390	1345	1357	1331	1357
4261	1535	1490	1464	1538	1325	1322	1347	1360	1331	1336	1369	1317	1317	1307	1354	1332	1340	1333	1313	1328	1319	1304	1285	1255	1274	1312	1294	1326	1331	1309	1332	1329	1302	1303	1293	1306	1367	1325	1338	1352	1308	1308	1293	1299	1360	1309	1321	1297	1325
10	1595	1560	1534	1606	1401	1392	1415	1430	1419	1408	1441	1393	1393	1393	1426	1396	1416	1405	1389	1388	1379	1370	1347	1321	1334	1370	1350	1386	1391	1371	1392	1389	1362	1363	1353	1366	1437	1385	1400	1406	1366	1366	1355	1363	1414	1387	1383	1365	1383
[truncated: 582 more columns]
